# Supplementary material for: LncRNA RUS shapes the gene expression program towards neurogenesis
Source: Life Sci Alliance. 2022 Jun 10;5(10):e202201504. doi: 10.26508/lsa.202201504 (PMC9187872; doi:10.26508/lsa.202201504)
Supplement: Supplementary file 2 [file LSA-2022-01504_TableS2.xlsx]

## Sheet: shRNA
name	strand	5'-> 3' sequence
RUS-sh-FW	FW	ccggGCCAGAAAGACCTGGATATctcgagATATCCAGGTCTTTCTGGCtttttg
RUS-sh-RV	RV	aattcaaaaaGCCAGAAAGACCTGGATATctcgagATATCCAGGTCTTTCTGGC

## Sheet: PCR
name	strand	5'-> 3' sequence
TBP-fw	FW	TCTACCGTGAATCTTGGCTGT
TBP-rv	RV	CAAATCgcTCTTGGCTCCTG
RUS-fw	FW	GGCGTTCGGAGTGTAGATTG
RUS-rv	RV	CTGAGGCATGCTTTGTGGAG
RUS-TSS-fw	FW	AGAGCATTTGGGCTTAAGCC
RUS-TTS-rv	RV	GGGAGCTATAGAGCATATGT
Nestin-fw	FW	AGGCTGAGAACTCTCGCTTGC
Nestin-rv	RV	GGTGCTGGTCCTCTGGTATCC
β-tubulin III-fw	FW	TAGACCCCAGCGGCAACTAT
β-tubulin III-rv	RV	GTTCCAGGTTCCAAGTCCACC
Map2-fw	FW	AGTTCAAGTAGTCACAGCTG
Map2-rv	RV	TGTGGCTGTTTGTTCTGAG
GFAP-fw	FW	GCACTCAATACGAGGCAGTG
GFAP-rv	RV	GGCGATAGTCGTTAGCTTCG
Glast-fw	FW	AAGCAACGGAGAAGAGCCTA
Glast-rv	RV	CCTCCCGGTAGCTCATTTTA
GAPDH-fw	FW	CTCCCACTCTTCCACCTTCG
GAPDH-rv	RV	CCACCACCCTGTTGCTGTAG
Malat-fw	FW	GACTAGCATTGGCAGCTGAC
Malat-rv	RV	TCCGTATGGCTCCTTCTTCC
Mapt-fw	FW	GCCAGGAGTTTGACACAATG
Mapt-rv	RV	TTGGAGTGCTCTTAGCATCG
Map2-fw	FW	AGTTCAAGTAGTCACAGCTG
Map2-rv	RV	TGTGGCTGTTTGTTCTGAG

## Sheet: RACE
oligonucleotide	orientation	5'-> 3' sequence
RUS-3'RACE	FW	TCTTTACTATGGCTCCTACCAC

## Sheet: cloning
name	strand	5'-> 3' sequence
BamH-GFP-fw	FW	ttctggatcctaccatggtgagcaagggc
Kpn-GFP-rv	RV	cttggtaccgatgcctacttgtacagctcgt
FRT-fw	FW	gatcgaagttcctattccgaagttcctattctctagaaagtataggaacttc
FRT-rv	RV	ctaggaagttcctatactttctagagaatag gaacttcggaataggaacttc
MS2-fw	FW	TACGACTCATCTAGAGGCGTACAC
MS2-rv	RV	CATGATTACGGATCCCGTACCCTG
RUS-LIC-fw	FW	TTTAAACTTAAG AGAGCATTTGGGCTTAAGCC
∆'RUS-LIC-fw	FW	TTTAAACTTAAG ACGTCTGTCCTCTGTAATGCAAGT
RUS-LIC-rv	RV	AAGCTTAAG GGGAGCTATAGAGCATATGT

## Sheet: ChIRP_probes
ODD
probe #	5' -> 3' sequence
1	AAAGGCTTGTACGCTGAGTG
3	AGTGAAAGATGAGCACCAGC
5	CTGTAACCACAGTGCAGTGG
7	CCAACCAATCCTCAGAACAT
EVEN
probe #	5' -> 3' sequence
2	AGAGTTCCAGTGAGTAGTTT
4	GGAAAGTTTAGTCAGAATTG
6	ACTTTTAGGATTAGTGCACA
8	GGTAGGAGCCATAGTAAAGA
