# Supplementary material for: LncRNA RUS shapes the gene expression program towards neurogenesis
Source: Life Sci Alliance. 2022 Jun 10;5(10):e202201504. doi: 10.26508/lsa.202201504 (PMC9187872; doi:10.26508/lsa.202201504)
Supplement: Supplementary file 5 [file LSA-2022-01504_TableS5.xlsx]

## Sheet: Info
Sheet Name	Description
proteinGroups	Maxquant Raw output
perseus_result_nuclear Proteins	Processed data with statistical analysis in Perseus:
	1. Remove protein groups: Potential Contaminations, Reversed and only identified by site
	2. Remove protein groups which are not detected in 5 out of 5 replicates of at least one condition
	3. log2 transformation of protein LFQ intensities
	4. Only keep proteins which are annotated as nuclear proteins in UniProt (SL-0191)
	5. Impute missing values from normal distribution: down shift 1.8, width 0.5
	6. Apply Student's Ttest with a permutation based FDR correction (p = 0.05; S0 = 1)

## Sheet: proteinGroups
Protein IDs	Majority protein IDs	Peptide counts (all)	Peptide counts (razor+unique)	Peptide counts (unique)	Protein names	Gene names	Fasta headers	Number of proteins	Peptides	Razor + unique peptides	Unique peptides	Peptides fl_1	Peptides fl_2	Peptides fl_3	Peptides fl_4	Peptides fl_5	Peptides mut_1	Peptides mut_2	Peptides mut_3	Peptides mut_4	Peptides mut_5	Razor + unique peptides fl_1	Razor + unique peptides fl_2	Razor + unique peptides fl_3	Razor + unique peptides fl_4	Razor + unique peptides fl_5	Razor + unique peptides mut_1	Razor + unique peptides mut_2	Razor + unique peptides mut_3	Razor + unique peptides mut_4	Razor + unique peptides mut_5	Unique peptides fl_1	Unique peptides fl_2	Unique peptides fl_3	Unique peptides fl_4	Unique peptides fl_5	Unique peptides mut_1	Unique peptides mut_2	Unique peptides mut_3	Unique peptides mut_4	Unique peptides mut_5	Sequence coverage [%]	Unique + razor sequence coverage [%]	Unique sequence coverage [%]	Mol. weight [kDa]	Sequence length	Sequence lengths	Fraction average	Fraction 1
A0A087WQ44	A0A087WQ44	3	2	2		Srcap	tr|A0A087WQ44|A0A087WQ44_MOUSE Snf2-related CREBBP activator protein OS=Mus musculus OX=10090 GN=Srcap PE=1 SV=1	1	3	2	2	2	2	1	1	1	3	1	1	1	2	1	1	0	0	0	2	0	0	0	1	1	1	0	0	0	2	0	0	0	1	0.8	0.6	0.6	349.26	3271	3271	1	5
A0A0A6YVU8;Q9JKV1	A0A0A6YVU8;Q9JKV1	2;2	2;2	2;2	Proteasomal ubiquitin receptor ADRM1	Gm9774;Adrm1	tr|A0A0A6YVU8|A0A0A6YVU8_MOUSE Predicted pseudogene 9774 OS=Mus musculus OX=10090 GN=Gm9774 PE=3 SV=1;sp|Q9JKV1|ADRM1_MOUSE Proteasomal ubiquitin receptor ADRM1 OS=Mus musculus OX=10090 GN=Adrm1 PE=1 SV=2	2	2	2	2	0	0	0	0	0	0	0	1	0	2	0	0	0	0	0	0	0	1	0	2	0	0	0	0	0	0	0	1	0	2	6.1	6.1	6.1	42.147	407	407;407	1	3
A0A0J9YUD5	A0A0J9YUD5	22	22	22			tr|A0A0J9YUD5|A0A0J9YUD5_MOUSE Nucleoporin 205 OS=Mus musculus OX=10090 GN=Nup205 PE=1 SV=1	1	22	22	22	15	18	16	13	10	3	1	1	1	2	15	18	16	13	10	3	1	1	1	2	15	18	16	13	10	3	1	1	1	2	13.9	13.9	13.9	233.1	2061	2061	1	80
A0A140LIW3	A0A140LIW3	1	1	1			tr|A0A140LIW3|A0A140LIW3_MOUSE FERM and PDZ domain-containing 3 OS=Mus musculus OX=10090 GN=Frmpd3 PE=1 SV=1	1	1	1	1	1	0	1	1	1	1	1	1	1	1	1	0	1	1	1	1	1	1	1	1	1	0	1	1	1	1	1	1	1	1	0.7	0.7	0.7	195.35	1774	1774	1	9
P51410;A0A140T8T4;S4R1R7	P51410;A0A140T8T4	7;7;2	7;7;2	7;7;2	60S ribosomal protein L9	Rpl9	sp|P51410|RL9_MOUSE 60S ribosomal protein L9 OS=Mus musculus OX=10090 GN=Rpl9 PE=1 SV=2;tr|A0A140T8T4|A0A140T8T4_MOUSE 60S ribosomal protein L9 OS=Mus musculus OX=10090 GN=Rpl9-ps6 PE=3 SV=1	3	7	7	7	3	3	5	2	3	7	5	7	2	6	3	3	5	2	3	7	5	7	2	6	3	3	5	2	3	7	5	7	2	6	59.9	59.9	59.9	21.881	192	192;192;191	1	43
A0A1B0GR91;A0A668KLC8	A0A1B0GR91	8;1	8;1	8;1			tr|A0A1B0GR91|A0A1B0GR91_MOUSE Predicted gene 4779 OS=Mus musculus OX=10090 GN=Gm4779 PE=1 SV=1	2	8	8	8	0	3	4	2	2	7	6	6	2	6	0	3	4	2	2	7	6	6	2	6	0	3	4	2	2	7	6	6	2	6	18.9	18.9	18.9	59.993	561	561;542	1	40
A0A1Y7VKT9;Q9EPV8	A0A1Y7VKT9;Q9EPV8	3;3	3;3	3;3	Ubiquitin-like protein 5	Ubl5	tr|A0A1Y7VKT9|A0A1Y7VKT9_MOUSE Ubiquitin-like protein 5 OS=Mus musculus OX=10090 GN=Ubl5b PE=4 SV=1;sp|Q9EPV8|UBL5_MOUSE Ubiquitin-like protein 5 OS=Mus musculus OX=10090 GN=Ubl5 PE=1 SV=1	2	3	3	3	2	3	3	2	2	3	3	3	1	3	2	3	3	2	2	3	3	3	1	3	2	3	3	2	2	3	3	3	1	3	41.1	41.1	41.1	8.5769	73	73;73	1	25
A0A2I3BPG9;P83882	A0A2I3BPG9;P83882	1;1	1;1	1;1	60S ribosomal protein L36a	Rpl36a	tr|A0A2I3BPG9|A0A2I3BPG9_MOUSE Ribosomal protein L36A, pseudogene 1 OS=Mus musculus OX=10090 GN=Rpl36a-ps1 PE=3 SV=1;sp|P83882|RL36A_MOUSE 60S ribosomal protein L36a OS=Mus musculus OX=10090 GN=Rpl36a PE=3 SV=2	2	1	1	1	0	1	1	1	1	1	1	1	0	1	0	1	1	1	1	1	1	1	0	1	0	1	1	1	1	1	1	1	0	1	8.5	8.5	8.5	12.455	106	106;106	1	8
A0A338P6K9	A0A338P6K9	6	6	6			tr|A0A338P6K9|A0A338P6K9_MOUSE Glutamine and serine-rich 1 OS=Mus musculus OX=10090 GN=Qser1 PE=1 SV=1	1	6	6	6	1	1	1	1	0	5	3	2	0	4	1	1	1	1	0	5	3	2	0	4	1	1	1	1	0	5	3	2	0	4	5.2	5.2	5.2	194.47	1788	1788	1	18
A0A494BB10	A0A494BB10	1	1	1			tr|A0A494BB10|A0A494BB10_MOUSE Predicted gene, 50478 OS=Mus musculus OX=10090 GN=Gm50478 PE=4 SV=1	1	1	1	1	1	1	1	1	1	0	1	0	1	0	1	1	1	1	1	0	1	0	1	0	1	1	1	1	1	0	1	0	1	0	10.1	10.1	10.1	11.148	99	99	1	7
A2A432;Q3TCH7	A2A432	9;3	9;3	9;3	Cullin-4B	Cul4b	sp|A2A432|CUL4B_MOUSE Cullin-4B OS=Mus musculus OX=10090 GN=Cul4b PE=1 SV=1	2	9	9	9	3	7	4	3	1	7	4	8	1	6	3	7	4	3	1	7	4	8	1	6	3	7	4	3	1	7	4	8	1	6	11.2	11.2	11.2	110.7	970	970;759	1	44
A2A484	A2A484	9	9	9		Zmynd8	tr|A2A484|A2A484_MOUSE Zinc finger, MYND-type-containing 8 OS=Mus musculus OX=10090 GN=Zmynd8 PE=1 SV=1	1	9	9	9	5	5	4	5	3	5	2	3	0	7	5	5	4	5	3	5	2	3	0	7	5	5	4	5	3	5	2	3	0	7	10.9	10.9	10.9	136.94	1235	1235	1	39
A2A4P0	A2A4P0	32	31	31	ATP-dependent RNA helicase DHX8	Dhx8	sp|A2A4P0|DHX8_MOUSE ATP-dependent RNA helicase DHX8 OS=Mus musculus OX=10090 GN=Dhx8 PE=2 SV=1	1	32	31	31	17	21	22	18	15	25	22	25	6	27	16	20	21	17	14	24	21	24	6	26	16	20	21	17	14	24	21	24	6	26	31.4	30.7	30.7	142.57	1244	1244	1	217
A2A654	A2A654	2	2	2		Bptf	tr|A2A654|A2A654_MOUSE Bromodomain PHD finger transcription factor OS=Mus musculus OX=10090 GN=Bptf PE=1 SV=1	1	2	2	2	0	2	0	1	1	2	2	2	0	1	0	2	0	1	1	2	2	2	0	1	0	2	0	1	1	2	2	2	0	1	1	1	1	333.22	3036	3036	1	11
A2A6Q5	A2A6Q5	7	7	7	Cell division cycle protein 27 homolog	Cdc27	sp|A2A6Q5|CDC27_MOUSE Cell division cycle protein 27 homolog OS=Mus musculus OX=10090 GN=Cdc27 PE=1 SV=1	1	7	7	7	1	4	1	1	0	4	2	6	0	5	1	4	1	1	0	4	2	6	0	5	1	4	1	1	0	4	2	6	0	5	12.7	12.7	12.7	91.841	825	825	1	25
A2A791	A2A791	2	2	2	Zinc finger MYM-type protein 4	Zmym4	sp|A2A791|ZMYM4_MOUSE Zinc finger MYM-type protein 4 OS=Mus musculus OX=10090 GN=Zmym4 PE=1 SV=1	1	2	2	2	0	0	0	0	0	0	0	0	0	2	0	0	0	0	0	0	0	0	0	2	0	0	0	0	0	0	0	0	0	2	1.4	1.4	1.4	172.44	1549	1549	1	2
A2A8U2	A2A8U2	1	1	1	Transmembrane protein 201	Tmem201	sp|A2A8U2|TM201_MOUSE Transmembrane protein 201 OS=Mus musculus OX=10090 GN=Tmem201 PE=1 SV=1	1	1	1	1	1	1	1	0	0	0	0	0	0	0	1	1	1	0	0	0	0	0	0	0	1	1	1	0	0	0	0	0	0	0	1.4	1.4	1.4	72.499	664	664	1	3
A2A935	A2A935	1	1	1	PR domain zinc finger protein 16	Prdm16	sp|A2A935|PRD16_MOUSE Histone-lysine N-methyltransferase PRDM16 OS=Mus musculus OX=10090 GN=Prdm16 PE=1 SV=1	1	1	1	1	1	1	1	1	1	1	1	1	0	1	1	1	1	1	1	1	1	1	0	1	1	1	1	1	1	1	1	1	0	1	0.7	0.7	0.7	140.86	1275	1275	1	9
A2AAY5;O89032	A2AAY5	6;1	6;1	6;1	SH3 and PX domain-containing protein 2B	Sh3pxd2b	sp|A2AAY5|SPD2B_MOUSE SH3 and PX domain-containing protein 2B OS=Mus musculus OX=10090 GN=Sh3pxd2b PE=1 SV=1	2	6	6	6	0	5	2	3	1	5	5	5	2	4	0	5	2	3	1	5	5	5	2	4	0	5	2	3	1	5	5	5	2	4	9.1	9.1	9.1	101.52	908	908;1124	1	32
A2ABV5	A2ABV5	11	11	11	Mediator of RNA polymerase II transcription subunit 14	Med14	sp|A2ABV5|MED14_MOUSE Mediator of RNA polymerase II transcription subunit 14 OS=Mus musculus OX=10090 GN=Med14 PE=1 SV=1	1	11	11	11	3	4	3	2	3	6	3	4	3	11	3	4	3	2	3	6	3	4	3	11	3	4	3	2	3	6	3	4	3	11	10.8	10.8	10.8	160.96	1459	1459	1	48
A2ADY9	A2ADY9	7	7	7	Protein DDI1 homolog 2	Ddi2	sp|A2ADY9|DDI2_MOUSE Protein DDI1 homolog 2 OS=Mus musculus OX=10090 GN=Ddi2 PE=1 SV=1	1	7	7	7	3	7	4	2	1	6	5	7	1	5	3	7	4	2	1	6	5	7	1	5	3	7	4	2	1	6	5	7	1	5	27.6	27.6	27.6	44.59	399	399	1	43
A2AFI6	A2AFI6	5	5	5		Gm364	tr|A2AFI6|A2AFI6_MOUSE Transmembrane 9 superfamily member OS=Mus musculus OX=10090 GN=Tm9sf5 PE=1 SV=1	1	5	5	5	5	4	4	4	4	1	1	1	1	0	5	4	4	4	4	1	1	1	1	0	5	4	4	4	4	1	1	1	1	0	8.8	8.8	8.8	77.299	671	671	1	25
A2AG50	A2AG50	12	12	12	MAP7 domain-containing protein 2	Map7d2	sp|A2AG50|MA7D2_MOUSE MAP7 domain-containing protein 2 OS=Mus musculus OX=10090 GN=Map7d2 PE=1 SV=1	1	12	12	12	8	7	9	6	4	7	6	8	6	8	8	7	9	6	4	7	6	8	6	8	8	7	9	6	4	7	6	8	6	8	18.3	18.3	18.3	86.049	781	781	1	70
A2AGH6	A2AGH6	4	4	4	Mediator of RNA polymerase II transcription subunit 12	Med12	sp|A2AGH6|MED12_MOUSE Mediator of RNA polymerase II transcription subunit 12 OS=Mus musculus OX=10090 GN=Med12 PE=1 SV=1	1	4	4	4	0	1	0	0	1	2	0	0	0	4	0	1	0	0	1	2	0	0	0	4	0	1	0	0	1	2	0	0	0	4	1.6	1.6	1.6	244.56	2190	2190	1	8
A2AGT5	A2AGT5	77	77	77	Cytoskeleton-associated protein 5	Ckap5	sp|A2AGT5|CKAP5_MOUSE Cytoskeleton-associated protein 5 OS=Mus musculus OX=10090 GN=Ckap5 PE=1 SV=1	1	77	77	77	39	55	36	40	29	62	58	65	34	70	39	55	36	40	29	62	58	65	34	70	39	55	36	40	29	62	58	65	34	70	42.3	42.3	42.3	225.63	2032	2032	1	526
A2AHC3	A2AHC3	11	11	11	Calmodulin-regulated spectrin-associated protein 1	Camsap1	sp|A2AHC3|CAMP1_MOUSE Calmodulin-regulated spectrin-associated protein 1 OS=Mus musculus OX=10090 GN=Camsap1 PE=1 SV=1	1	11	11	11	1	5	4	3	3	8	4	4	0	10	1	5	4	3	3	8	4	4	0	10	1	5	4	3	3	8	4	4	0	10	10.8	10.8	10.8	175.89	1581	1581	1	42
A2AHM0	A2AHM0	1	1	1		Mageb2	tr|A2AHM0|A2AHM0_MOUSE MAGE family member B2 OS=Mus musculus OX=10090 GN=Mageb2 PE=4 SV=1	1	1	1	1	0	1	0	0	0	0	0	1	0	1	0	1	0	0	0	0	0	1	0	1	0	1	0	0	0	0	0	1	0	1	5	5	5	41.333	380	380	1	3
A2AIV2	A2AIV2	42	42	42	Protein virilizer homolog	Kiaa1429	sp|A2AIV2|VIR_MOUSE Protein virilizer homolog OS=Mus musculus OX=10090 GN=Virma PE=1 SV=1	1	42	42	42	17	23	23	15	20	34	29	30	9	35	17	23	23	15	20	34	29	30	9	35	17	23	23	15	20	34	29	30	9	35	32.9	32.9	32.9	201.44	1811	1811	1	264
A2AJI0	A2AJI0	4	4	4	MAP7 domain-containing protein 1	Map7d1	sp|A2AJI0|MA7D1_MOUSE MAP7 domain-containing protein 1 OS=Mus musculus OX=10090 GN=Map7d1 PE=1 SV=1	1	4	4	4	3	2	1	1	1	2	3	3	0	2	3	2	1	1	1	2	3	3	0	2	3	2	1	1	1	2	3	3	0	2	6.5	6.5	6.5	93.275	846	846	1	18
A2AJK6;A3KFM7;P40201;E9PZM4	A2AJK6	23;2;1;1	23;2;1;1	17;0;0;0	Chromodomain-helicase-DNA-binding protein 7	Chd7	sp|A2AJK6|CHD7_MOUSE Chromodomain-helicase-DNA-binding protein 7 OS=Mus musculus OX=10090 GN=Chd7 PE=1 SV=1	4	23	23	17	8	8	10	8	6	22	17	16	1	20	8	8	10	8	6	22	17	16	1	20	6	5	6	4	3	17	13	12	0	16	9.4	9.4	7.5	334.06	2986	2986;2711;1711;1827	1	121
A2AJU2;Q62012;B1B0X0;B1AZM2;B1AVZ5;B1AV09;A2BI02;B1B0X6;E9QA14;A2BI72;A2ADW8	A2AJU2;Q62012;B1B0X0;B1AZM2;B1AVZ5;B1AV09;A2BI02;B1B0X6;E9QA14;A2BI72;A2ADW8	7;7;7;7;7;7;7;6;6;6;6	7;7;7;7;7;7;7;6;6;6;6	7;7;7;7;7;7;7;6;6;6;6		Gm10439;Ott;Gm15107;Gm15091;Gm15127;Luzp4;Gm15080;Gm15114;Gm15097;Gm15093;Gm15128	tr|A2AJU2|A2AJU2_MOUSE Predicted gene 10439 OS=Mus musculus OX=10090 GN=Gm10439 PE=4 SV=1;tr|Q62012|Q62012_MOUSE Ott protein OS=Mus musculus OX=10090 GN=Gm15085 PE=2 SV=1;tr|B1B0X0|B1B0X0_MOUSE Predicted gene 15107 OS=Mus musculus OX=10090 GN=Gm15107 PE=4	11	7	7	7	5	5	4	2	3	5	3	5	3	4	5	5	4	2	3	5	3	5	3	4	5	5	4	2	3	5	3	5	3	4	15	15	15	51.162	433	433;449;449;449;449;449;449;433;449;449;449	1	41
A2AK42;A2AK44;Q8C5N3	A2AK42;A2AK44;Q8C5N3	4;4;4	4;4;4	4;4;4	Pre-mRNA-splicing factor CWC22 homolog	Gm13697;Gm13695;Cwc22	tr|A2AK42|A2AK42_MOUSE Predicted gene 13691 OS=Mus musculus OX=10090 GN=Gm13697 PE=4 SV=1;tr|A2AK44|A2AK44_MOUSE Predicted gene 13695 OS=Mus musculus OX=10090 GN=Gm13695 PE=4 SV=1;sp|Q8C5N3|CWC22_MOUSE Pre-mRNA-splicing factor CWC22 homolog OS=Mus musculus	3	4	4	4	3	3	2	2	1	4	3	3	1	4	3	3	2	2	1	4	3	3	1	4	3	3	2	2	1	4	3	3	1	4	5.8	5.8	5.8	95.671	830	830;830;908	1	26
A2AKG8	A2AKG8	3	3	3	Focadhesin	Focad	sp|A2AKG8|FOCAD_MOUSE Focadhesin OS=Mus musculus OX=10090 GN=Focad PE=1 SV=1	1	3	3	3	0	1	0	0	0	1	0	1	0	3	0	1	0	0	0	1	0	1	0	3	0	1	0	0	0	1	0	1	0	3	2.9	2.9	2.9	198.95	1798	1798	1	6
A2AMD0	A2AMD0	9	1	1		Gm12666	tr|A2AMD0|A2AMD0_MOUSE Predicted gene 12666 (Fragment) OS=Mus musculus OX=10090 GN=Gm12666 PE=1 SV=1	1	9	1	1	6	8	6	6	7	7	6	8	2	9	0	0	0	0	0	0	0	0	0	1	0	0	0	0	0	0	0	0	0	1	39.8	6.7	6.7	28.465	254	254	1	1
A2ANY6	A2ANY6	23	23	23		Mdn1	tr|A2ANY6|A2ANY6_MOUSE Midasin OS=Mus musculus OX=10090 GN=Mdn1 PE=1 SV=1	1	23	23	23	9	15	8	3	4	14	3	12	0	19	9	15	8	3	4	14	3	12	0	19	9	15	8	3	4	14	3	12	0	19	5.7	5.7	5.7	630.33	5589	5589	1	87
A2APB8	A2APB8	32	32	32	Targeting protein for Xklp2	Tpx2	sp|A2APB8|TPX2_MOUSE Targeting protein for Xklp2 OS=Mus musculus OX=10090 GN=Tpx2 PE=1 SV=1	1	32	32	32	21	21	25	21	20	24	26	27	21	27	21	21	25	21	20	24	26	27	21	27	21	21	25	21	20	24	26	27	21	27	45.9	45.9	45.9	85.893	745	745	1	252
A2AR02	A2AR02	10	10	10	Peptidyl-prolyl cis-trans isomerase G	Ppig	sp|A2AR02|PPIG_MOUSE Peptidyl-prolyl cis-trans isomerase G OS=Mus musculus OX=10090 GN=Ppig PE=1 SV=1	1	10	10	10	6	6	8	6	7	10	10	10	5	10	6	6	8	6	7	10	10	10	5	10	6	6	8	6	7	10	10	10	5	10	16.6	16.6	16.6	88.324	752	752	1	81
A2ASS6	A2ASS6	4	3	3	Titin	Ttn	sp|A2ASS6|TITIN_MOUSE Titin OS=Mus musculus OX=10090 GN=Ttn PE=1 SV=1	1	4	3	3	2	2	2	1	3	1	2	2	1	2	1	1	1	0	2	0	1	1	0	1	1	1	1	0	2	0	1	1	0	1	0.1	0.1	0.1	3906.4	35213	35213	1	8
A2AT37	A2AT37	14	14	14		Upf2	sp|A2AT37|RENT2_MOUSE Regulator of nonsense transcripts 2 OS=Mus musculus OX=10090 GN=Upf2 PE=1 SV=1	1	14	14	14	8	9	11	8	6	11	9	12	1	12	8	9	11	8	6	11	9	12	1	12	8	9	11	8	6	11	9	12	1	12	14.2	14.2	14.2	147.55	1269	1269	1	98
A2AVT0	A2AVT0	1	1	1	Olfactory receptor	Olfr1160	tr|A2AVT0|A2AVT0_MOUSE Olfactory receptor OS=Mus musculus OX=10090 GN=Olfr1160 PE=3 SV=3	1	1	1	1	0	1	0	1	1	0	0	0	0	0	0	1	0	1	1	0	0	0	0	0	0	1	0	1	1	0	0	0	0	0	4.1	4.1	4.1	35.936	319	319	1	3
A2BE28	A2BE28	1	1	1	Ribosomal biogenesis protein LAS1L	Las1l	sp|A2BE28|LAS1L_MOUSE Ribosomal biogenesis protein LAS1L OS=Mus musculus OX=10090 GN=Las1l PE=1 SV=1	1	1	1	1	0	1	1	0	0	1	1	1	1	0	0	1	1	0	0	1	1	1	1	0	0	1	1	0	0	1	1	1	1	0	1.8	1.8	1.8	89.413	776	776	1	6
A2BH40	A2BH40	55	55	52	AT-rich interactive domain-containing protein 1A	Arid1a	sp|A2BH40|ARI1A_MOUSE AT-rich interactive domain-containing protein 1A OS=Mus musculus OX=10090 GN=Arid1a PE=1 SV=1	1	55	55	52	32	34	39	35	29	40	39	42	11	48	32	34	39	35	29	40	39	42	11	48	29	31	37	32	26	37	36	39	11	46	33.7	33.7	32	242.09	2283	2283	1	402
A2CG63	A2CG63	4	4	4	AT-rich interactive domain-containing protein 4B	Arid4b	sp|A2CG63|ARI4B_MOUSE AT-rich interactive domain-containing protein 4B OS=Mus musculus OX=10090 GN=Arid4b PE=1 SV=1	1	4	4	4	1	2	1	0	1	2	2	3	2	4	1	2	1	0	1	2	2	3	2	4	1	2	1	0	1	2	2	3	2	4	4.8	4.8	4.8	147.64	1314	1314	1	18
A2RSY1	A2RSY1	4	4	4	KAT8 regulatory NSL complex subunit 3	Kansl3	sp|A2RSY1|KANL3_MOUSE KAT8 regulatory NSL complex subunit 3 OS=Mus musculus OX=10090 GN=Kansl3 PE=1 SV=1	1	4	4	4	0	2	0	0	0	3	1	1	0	4	0	2	0	0	0	3	1	1	0	4	0	2	0	0	0	3	1	1	0	4	10.6	10.6	10.6	96.134	903	903	1	11
A2RSY6	A2RSY6	5	5	5	TRMT1-like protein	Trmt1l	sp|A2RSY6|TRM1L_MOUSE TRMT1-like protein OS=Mus musculus OX=10090 GN=Trmt1l PE=1 SV=1	1	5	5	5	1	3	3	2	1	3	1	2	0	4	1	3	3	2	1	3	1	2	0	4	1	3	3	2	1	3	1	2	0	4	7.8	7.8	7.8	80.86	728	728	1	20
A2RTL5	A2RTL5	1	1	1	Arginine/serine-rich coiled-coil protein 2	Rsrc2	sp|A2RTL5|RSRC2_MOUSE Arginine/serine-rich coiled-coil protein 2 OS=Mus musculus OX=10090 GN=Rsrc2 PE=2 SV=1	1	1	1	1	0	1	1	0	1	1	0	1	0	1	0	1	1	0	1	1	0	1	0	1	0	1	1	0	1	1	0	1	0	1	2.7	2.7	2.7	43.876	376	376	1	6
A6H687	A6H687	3	3	3	SAC3 domain-containing protein 1	Sac3d1	sp|A6H687|SAC31_MOUSE SAC3 domain-containing protein 1 OS=Mus musculus OX=10090 GN=Sac3d1 PE=1 SV=1	1	3	3	3	2	1	2	3	1	2	2	2	1	2	2	1	2	3	1	2	2	2	1	2	2	1	2	3	1	2	2	2	1	2	12.9	12.9	12.9	46.384	427	427	1	18
REV__Q8BYR5;A6PWV5	REV__Q8BYR5;A6PWV5	1;1	1;1	1;1	AT-rich interactive domain-containing protein 3C	Arid3c	sp|Q8BYR5|CAPS2_MOUSE Calcium-dependent secretion activator 2 OS=Mus musculus OX=10090 GN=Cadps2 PE=1 SV=2;sp|A6PWV5|ARI3C_MOUSE AT-rich interactive domain-containing protein 3C OS=Mus musculus OX=10090 GN=Arid3c PE=2 SV=2	2	1	1	1	1	1	0	0	0	0	0	0	1	1	1	1	0	0	0	0	0	0	1	1	1	1	0	0	0	0	0	0	1	1	1.5	1.5	1.5	147.84	1297	1297;409	1	4
A6PWY4	A6PWY4	7	7	7	WD repeat-containing protein 76	Wdr76	sp|A6PWY4|WDR76_MOUSE WD repeat-containing protein 76 OS=Mus musculus OX=10090 GN=Wdr76 PE=1 SV=1	1	7	7	7	1	0	1	0	0	6	4	6	1	7	1	0	1	0	0	6	4	6	1	7	1	0	1	0	0	6	4	6	1	7	15.4	15.4	15.4	69.007	622	622	1	26
A8DUK4;P02088	A8DUK4;P02088	5;3	5;3	4;2	Hemoglobin subunit beta-1	Hbbt1;Hbb-b1	tr|A8DUK4|A8DUK4_MOUSE Beta-globin OS=Mus musculus OX=10090 GN=Hbb-bs PE=1 SV=1;sp|P02088|HBB1_MOUSE Hemoglobin subunit beta-1 OS=Mus musculus OX=10090 GN=Hbb-b1 PE=1 SV=2	2	5	5	4	1	1	1	1	1	0	5	1	0	1	1	1	1	1	1	0	5	1	0	1	0	0	0	0	0	0	4	0	0	0	46.9	46.9	40.8	15.748	147	147;147	1	16
B1AQJ2	B1AQJ2	6	6	6	Ubiquitin carboxyl-terminal hydrolase 36	Usp36	sp|B1AQJ2|UBP36_MOUSE Ubiquitin carboxyl-terminal hydrolase 36 OS=Mus musculus OX=10090 GN=Usp36 PE=1 SV=1	1	6	6	6	6	4	5	5	4	5	6	5	1	5	6	4	5	5	4	5	6	5	1	5	6	4	5	5	4	5	6	5	1	5	10.3	10.3	10.3	119.91	1098	1098	1	46
B1AUN2	B1AUN2	8	8	8		Eif2b3	tr|B1AUN2|B1AUN2_MOUSE Eukaryotic translation initiation factor 2B, subunit 3 OS=Mus musculus OX=10090 GN=Eif2b3 PE=1 SV=1	1	8	8	8	3	5	5	1	2	2	2	5	1	5	3	5	5	1	2	2	2	5	1	5	3	5	5	1	2	2	2	5	1	5	23	23	23	50.488	452	452	1	31
B1AZI6;E9Q5E2	B1AZI6	57;24	57;24	57;24	THO complex subunit 2	Thoc2	sp|B1AZI6|THOC2_MOUSE THO complex subunit 2 OS=Mus musculus OX=10090 GN=Thoc2 PE=1 SV=1	2	57	57	57	37	45	42	40	41	44	45	47	34	55	37	45	42	40	41	44	45	47	34	55	37	45	42	40	41	44	45	47	34	55	44.2	44.2	44.2	182.77	1594	1594;1589	1	554
B2RPU8;Q9D1L0	B2RPU8;Q9D1L0	3;3	3;3	3;3	Coiled-coil-helix-coiled-coil-helix domain-containing protein 2	Zbed5;Chchd2	tr|B2RPU8|B2RPU8_MOUSE SCAN domain containing 3 OS=Mus musculus OX=10090 GN=Zbed5 PE=1 SV=1;sp|Q9D1L0|CHCH2_MOUSE Coiled-coil-helix-coiled-coil-helix domain-containing protein 2 OS=Mus musculus OX=10090 GN=Chchd2 PE=2 SV=1	2	3	3	3	2	3	3	2	2	3	3	2	2	2	2	3	3	2	2	3	3	2	2	2	2	3	3	2	2	3	3	2	2	2	6.2	6.2	6.2	84.266	756	756;153	1	26
B2RQC2	B2RQC2	3	3	3	Ubiquitin carboxyl-terminal hydrolase 42	Usp42	sp|B2RQC2|UBP42_MOUSE Ubiquitin carboxyl-terminal hydrolase 42 OS=Mus musculus OX=10090 GN=Usp42 PE=1 SV=1	1	3	3	3	1	1	0	2	0	1	0	2	0	3	1	1	0	2	0	1	0	2	0	3	1	1	0	2	0	1	0	2	0	3	4.3	4.3	4.3	146.22	1324	1324	1	10
B2RQC6	B2RQC6	8	8	8	CAD protein;Glutamine-dependent carbamoyl-phosphate synthase;Aspartate carbamoyltransferase;Dihydroorotase	Cad	sp|B2RQC6|PYR1_MOUSE CAD protein OS=Mus musculus OX=10090 GN=Cad PE=1 SV=1	1	8	8	8	2	4	3	1	1	3	1	4	0	8	2	4	3	1	1	3	1	4	0	8	2	4	3	1	1	3	1	4	0	8	5.6	5.6	5.6	243.24	2225	2225	1	27
B2RQG2	B2RQG2	19	19	19		Phf3	tr|B2RQG2|B2RQG2_MOUSE PHD finger protein 3 OS=Mus musculus OX=10090 GN=Phf3 PE=1 SV=1	1	19	19	19	5	10	9	9	6	13	10	13	4	17	5	10	9	9	6	13	10	13	4	17	5	10	9	9	6	13	10	13	4	17	12.9	12.9	12.9	225.54	2025	2025	1	97
B2RWS6	B2RWS6	19	19	11	Histone acetyltransferase p300	Ep300	sp|B2RWS6|EP300_MOUSE Histone acetyltransferase p300 OS=Mus musculus OX=10090 GN=Ep300 PE=1 SV=2	1	19	19	11	2	4	4	3	1	8	8	13	1	18	2	4	4	3	1	8	8	13	1	18	1	0	0	0	0	4	3	6	1	10	12	12	7.9	263.3	2412	2412	1	66
B2RX14	B2RX14	2	2	2	Terminal uridylyltransferase 4	Zcchc11	sp|B2RX14|TUT4_MOUSE Terminal uridylyltransferase 4 OS=Mus musculus OX=10090 GN=Tut4 PE=1 SV=2	1	2	2	2	0	0	0	0	0	1	1	1	0	2	0	0	0	0	0	1	1	1	0	2	0	0	0	0	0	1	1	1	0	2	2.3	2.3	2.3	184.65	1644	1644	1	5
B2RXQ2	B2RXQ2	13	13	8		Ppfia1	tr|B2RXQ2|B2RXQ2_MOUSE Ppfia1 protein OS=Mus musculus OX=10090 GN=Ppfia1 PE=1 SV=1	1	13	13	8	3	5	8	2	4	11	8	8	2	9	3	5	8	2	4	11	8	8	2	9	2	4	4	2	4	7	5	5	1	5	14	14	9.6	142.67	1266	1266	1	66
B2RY56	B2RY56	24	24	24	RNA-binding protein 25	Rbm25	sp|B2RY56|RBM25_MOUSE RNA-binding protein 25 OS=Mus musculus OX=10090 GN=Rbm25 PE=1 SV=2	1	24	24	24	14	18	20	18	18	21	19	21	12	21	14	18	20	18	18	21	19	21	12	21	14	18	20	18	18	21	19	21	12	21	31.6	31.6	31.6	99.551	838	838	1	229
C0HKD9;C0HKD8	C0HKD9;C0HKD8	8;8	8;8	8;8			sp|C0HKD9|MFA1B_MOUSE Microfibrillar-associated protein 1B OS=Mus musculus OX=10090 GN=Mfap1b PE=1 SV=1;sp|C0HKD8|MFA1A_MOUSE Microfibrillar-associated protein 1A OS=Mus musculus OX=10090 GN=Mfap1a PE=1 SV=1	2	8	8	8	5	4	5	5	5	6	6	5	4	8	5	4	5	5	5	6	6	5	4	8	5	4	5	5	5	6	6	5	4	8	26.2	26.2	26.2	51.954	439	439;439	1	68
C0HKE1;C0HKE3;C0HKE8;C0HKE9;C0HKE6;C0HKE4;C0HKE5;C0HKE2;C0HKE7;Q8CGP4;Q8R1M2;Q64523;Q8CGP7;Q6GSS7;Q8BFU2;Q8CGP5;Q8CGP6	C0HKE1;C0HKE3;C0HKE8;C0HKE9;C0HKE6;C0HKE4;C0HKE5;C0HKE2;C0HKE7;Q8CGP4;Q8R1M2;Q64523;Q8CGP7;Q6GSS7;Q8BFU2;Q8CGP5;Q8CGP6	4;4;4;4;4;4;4;4;4;4;4;4;4;4;4;4;4	4;4;4;4;4;4;4;4;4;4;4;4;4;4;4;4;4	1;1;1;1;1;1;1;1;1;1;1;1;1;1;1;1;1	Histone H2A;Histone H2A.J;Histone H2A type 2-C;Histone H2A type 1-K;Histone H2A type 2-A;Histone H2A type 3;Histone H2A type 1-F;Histone H2A type 1-H	Hist1h2aa;H2afj;Hist2h2ac;Hist1h2ak;Hist2h2aa1;Hist3h2a;Hist1h2af;Hist1h2ah	sp|C0HKE1|H2A1B_MOUSE Histone H2A type 1-B OS=Mus musculus OX=10090 GN=H2ac4 PE=1 SV=1;sp|C0HKE3|H2A1D_MOUSE Histone H2A type 1-D OS=Mus musculus OX=10090 GN=H2ac7 PE=1 SV=1;sp|C0HKE8|H2A1O_MOUSE Histone H2A type 1-O OS=Mus musculus OX=10090 GN=Hist1h2ao P	17	4	4	1	4	4	4	4	4	4	4	4	4	3	4	4	4	4	4	4	4	4	4	3	1	1	1	1	1	1	1	1	1	1	32.3	32.3	14.6	14.135	130	130;130;130;130;130;130;130;130;130;129;129;129;130;130;130;130;128	1	47
CON__ENSEMBL:ENSBTAP00000034412	CON__ENSEMBL:ENSBTAP00000034412	2	2	2				1	2	2	2	1	1	2	1	0	0	0	0	0	0	1	1	2	1	0	0	0	0	0	0	1	1	2	1	0	0	0	0	0	0	12.1	12.1	12.1	22.336	199	199	1	5
CON__ENSEMBL:ENSBTAP00000038329	CON__ENSEMBL:ENSBTAP00000038329	1	1	1				1	1	1	1	1	1	1	1	1	1	1	1	1	0	1	1	1	1	1	1	1	1	1	0	1	1	1	1	1	1	1	1	1	0	15	15	15	8.5787	80	80	1	9
CON__O76013	CON__O76013	3	2	1				1	3	2	1	2	1	1	1	1	1	1	1	1	3	1	0	0	0	0	0	0	0	0	2	1	0	0	0	0	0	0	0	0	1	6.6	5.1	2.6	52.247	467	467	1	3
CON__O95678	CON__O95678	16	2	2				1	16	2	2	8	9	9	9	10	9	13	6	8	15	0	0	0	0	0	1	1	0	0	2	0	0	0	0	0	1	1	0	0	2	18	2.2	2.2	59.504	551	551	1	4
CON__P00761	CON__P00761	4	4	4				1	4	4	4	4	4	4	4	4	4	4	4	3	4	4	4	4	4	4	4	4	4	3	4	4	4	4	4	4	4	4	4	3	4	25.1	25.1	25.1	24.409	231	231	1	58
CON__P01966	CON__P01966	5	4	4				1	5	4	4	3	4	4	3	4	3	3	4	1	4	2	3	3	2	3	2	2	3	1	3	2	3	3	2	3	2	2	3	1	3	50	43.7	43.7	15.184	142	142	1	24
CON__P02070;P04444;P02104	CON__P02070	6;1;1	6;1;1	4;1;1				3	6	6	4	3	5	4	2	3	3	1	1	0	3	3	5	4	2	3	3	1	1	0	3	2	3	3	1	1	2	1	0	0	1	47.6	47.6	31.7	15.954	145	145;147;147	1	25
CON__P02533;CON__Q6IFX2;Q6IFX2;CON__A2A4G1;Q61414;CON__Q61782;CON__Q9D312;Q9D312;Q8CCX5;CON__Q8N1A0	CON__P02533	31;14;14;8;8;4;3;3;2;1	26;13;13;3;3;4;3;3;2;1	5;2;2;0;0;1;0;0;0;0				10	31	26	5	19	15	16	21	28	20	24	17	22	31	14	11	12	17	23	16	19	12	17	26	2	1	1	4	5	3	4	3	4	5	64.4	59.1	15.5	51.621	472	472;452;452;456;452;93;431;431;294;295	1	195
CON__P02535-1;P02535	CON__P02535-1;P02535	13;13	1;1	1;1	Keratin, type I cytoskeletal 10	Krt10	;sp|P02535|K1C10_MOUSE Keratin, type I cytoskeletal 10 OS=Mus musculus OX=10090 GN=Krt10 PE=1 SV=3	2	13	1	1	10	10	10	11	12	10	11	9	8	12	0	0	0	0	1	1	0	1	0	1	0	0	0	0	1	1	0	1	0	1	17.9	4	4	57.769	570	570;570	1	4
CON__P02538;CON__H-INV:HIT000292931;Q99M73	CON__P02538	41;5;5	21;1;1	3;0;0				3	41	21	3	25	19	19	22	31	21	31	13	22	39	10	7	7	7	13	6	13	1	9	20	1	1	1	0	2	1	2	0	0	3	57.4	36.9	3.9	60.044	564	564;443;603	1	95
CON__P02662	CON__P02662	9	9	9				1	9	9	9	3	2	9	3	4	3	2	3	2	2	3	2	9	3	4	3	2	3	2	2	3	2	9	3	4	3	2	3	2	2	31.2	31.2	31.2	22.975	199	199	1	35
CON__P02663	CON__P02663	3	3	3				1	3	3	3	2	1	3	2	1	2	2	2	1	1	2	1	3	2	1	2	2	2	1	1	2	1	3	2	1	2	2	2	1	1	14.5	14.5	14.5	24.348	207	207	1	17
CON__P02666	CON__P02666	4	4	4				1	4	4	4	2	2	4	2	1	1	1	2	1	0	2	2	4	2	1	1	1	2	1	0	2	2	4	2	1	1	1	2	1	0	15.8	15.8	15.8	23.583	209	209	1	16
CON__P02668	CON__P02668	2	2	2				1	2	2	2	0	0	2	0	0	0	0	0	0	0	0	0	2	0	0	0	0	0	0	0	0	0	2	0	0	0	0	0	0	0	14.8	14.8	14.8	18.974	169	169	1	2
CON__P02754	CON__P02754	7	7	7				1	7	7	7	0	0	7	0	1	0	0	0	0	0	0	0	7	0	1	0	0	0	0	0	0	0	7	0	1	0	0	0	0	0	29	29	29	18.281	162	162	1	8
CON__P02768-1	CON__P02768-1	8	4	3				1	8	4	3	3	4	5	3	4	3	5	2	6	2	0	1	1	0	1	0	2	0	2	0	0	0	0	0	1	0	1	0	2	0	11.3	6.6	5.1	69.366	609	609	1	7
CON__P02769	CON__P02769	24	24	20				1	24	24	20	18	18	19	16	16	20	22	17	21	16	18	18	19	16	16	20	22	17	21	16	15	15	15	13	13	17	19	15	17	14	44.8	44.8	40	69.293	607	607	1	205
CON__P04259	CON__P04259	40	3	1				1	40	3	1	23	18	19	22	30	20	29	13	21	38	0	1	1	1	2	0	0	0	0	3	0	1	0	1	1	0	0	0	0	1	57.4	6.6	3	59.998	564	564	1	8
CON__P04264;CON__H-INV:HIT000016045	CON__P04264	50;4	44;2	28;0				2	50	44	28	44	40	34	42	46	43	47	34	43	44	39	36	30	37	40	39	41	32	37	39	24	20	16	22	24	24	25	21	22	25	56.4	52.6	39.4	66.017	644	644;99	1	687
CON__P08727	CON__P08727	9	1	1				1	9	1	1	7	5	6	5	7	6	6	5	7	9	1	0	0	0	1	0	0	0	0	1	1	0	0	0	1	0	0	0	0	1	16.5	2.2	2.2	44.091	400	400	1	3
CON__P08779;CON__Q9Z2K1;CON__Q3ZAW8;Q9Z2K1;Q9WTL4	CON__P08779	30;11;11;11;1	13;2;2;2;1	12;2;2;2;1				5	30	13	12	19	15	15	16	23	17	20	11	17	29	7	5	3	3	7	5	6	1	4	12	7	5	3	3	7	5	6	1	3	11	59.4	35.9	33.6	51.267	473	473;469;474;469;1300	1	54
CON__P12763	CON__P12763	5	5	5				1	5	5	5	1	2	1	3	1	5	3	2	2	4	1	2	1	3	1	5	3	2	2	4	1	2	1	3	1	5	3	2	2	4	16.4	16.4	16.4	38.418	359	359	1	24
CON__P13645;CON__Q7Z3Y7;CON__Q148H6;CON__Q7Z3Y8;CON__Q2M2I5;CON__Q99456;P05784;CON__P05784;CON__Q7Z3Z0;CON__Q7Z3Y9;CON__A2AB72;CON__Q92764;CON__Q14532;A6BLY7;Q9Z320;Q8VCW2;B1AQ75;Q6IFX3;A1L317;Q62168	CON__P13645	40;3;3;2;2;2;2;2;2;1;1;1;1;1;1;1;1;1;1;1	40;3;3;2;2;2;2;2;2;1;1;1;1;1;1;1;1;1;1;1	25;1;1;1;0;0;0;0;1;0;0;0;0;0;0;0;0;0;0;0				20	40	40	25	30	30	30	34	37	31	37	29	29	36	30	30	30	34	37	31	37	29	29	36	17	18	18	21	23	20	23	18	18	22	61.2	61.2	50.4	59.51	593	593;486;464;459;525;494;423;423;450;468;453;425;448;462;448;446;473;439;512;407	1	647
CON__P13647	CON__P13647	42	30	6				1	42	30	6	33	21	20	27	37	28	38	17	27	37	24	13	11	17	27	19	28	11	18	26	6	2	3	5	6	5	6	3	5	6	53.7	44.1	9.3	62.378	590	590	1	234
CON__P15497;Q00623	CON__P15497	9;1	9;1	9;1				2	9	9	9	6	8	9	4	5	3	3	4	1	4	6	8	9	4	5	3	3	4	1	4	6	8	9	4	5	3	3	4	1	4	43.4	43.4	43.4	30.276	265	265;264	1	47
CON__P19012	CON__P19012	9	2	1				1	9	2	1	5	4	6	5	8	6	6	4	6	7	0	0	1	0	2	1	1	0	0	0	0	0	0	0	1	0	0	0	0	0	14.5	4.2	2.2	49.167	456	456	1	5
CON__P20930	CON__P20930	7	7	7				1	7	7	7	2	0	1	1	5	2	5	0	2	7	2	0	1	1	5	2	5	0	2	7	2	0	1	1	5	2	5	0	2	7	1.9	1.9	1.9	435.16	4061	4061	1	34
CON__P35527	CON__P35527	29	28	28				1	29	28	28	19	20	19	21	28	26	26	17	25	23	18	19	18	21	27	25	25	16	24	22	18	19	18	21	27	25	25	16	24	22	56.2	55.1	55.1	62.129	623	623	1	290
CON__P35908v2;CON__P35908;CON__Q6NXH9;Q6NXH9	CON__P35908v2;CON__P35908	52;51;5;5	52;51;5;5	33;32;0;0			;	4	52	52	33	38	36	36	43	47	40	45	28	39	37	38	36	36	43	47	40	45	28	39	37	21	21	20	26	29	24	27	17	24	20	73.7	73.7	56.7	65.432	639	639;645;539;539	1	530
CON__P41361;P32261	CON__P41361;P32261	1;1	1;1	1;1	Antithrombin-III	Serpinc1	;sp|P32261|ANT3_MOUSE Antithrombin-III OS=Mus musculus OX=10090 GN=Serpinc1 PE=1 SV=1	2	1	1	1	0	1	0	1	0	1	1	1	0	0	0	1	0	1	0	1	1	1	0	0	0	1	0	1	0	1	1	1	0	0	2.4	2.4	2.4	52.347	465	465;465	1	5
CON__P78386;CON__O43790;CON__Q6NT21;CON__P78385;CON__Q14533;E9Q1Y9;CON__Q61726;Q9ERE2;P97861;Q6IMF0;Q9Z2T6	CON__P78386;CON__O43790;CON__Q6NT21;CON__P78385;CON__Q14533;E9Q1Y9;CON__Q61726;Q9ERE2;P97861;Q6IMF0;Q9Z2T6	6;5;5;5;5;4;4;4;4;4;4	3;2;2;2;2;2;2;2;2;2;2	3;2;2;2;2;2;2;2;2;2;2	Keratin, type II cuticular Hb1;Keratin, type II cuticular Hb6;Keratin, type II cuticular Hb3;Keratin, type II cuticular Hb5	5430421N21Rik;Krt81;Krt86;Krt83;Krt85	;;;;;tr|E9Q1Y9|E9Q1Y9_MOUSE Keratin 83 OS=Mus musculus OX=10090 GN=Krt83 PE=1 SV=1;;sp|Q9ERE2|KRT81_MOUSE Keratin, type II cuticular Hb1 OS=Mus musculus OX=10090 GN=Krt81 PE=2 SV=2;sp|P97861|KRT86_MOUSE Keratin, type II cuticular Hb6 OS=Mus musculus OX=100	11	6	3	3	2	2	2	2	1	1	3	1	1	5	1	0	1	0	0	0	1	0	0	2	1	0	1	0	0	0	1	0	0	2	8.3	4.5	4.5	55.802	507	507;486;493;493;505;479;479;481;486;495;507	1	6
CON__P81644	CON__P81644	1	1	1				1	1	1	1	0	1	0	0	0	1	1	1	0	1	0	1	0	0	0	1	1	1	0	1	0	1	0	0	0	1	1	1	0	1	16	16	16	11.202	100	100	1	5
CON__Q04695;CON__P19001;P19001;CON__Q99PS0;Q99PS0	CON__Q04695	25;8;8;1;1	12;2;2;1;1	4;2;2;0;0				5	25	12	4	11	10	10	10	14	12	15	11	11	25	0	0	0	1	2	0	3	2	0	12	0	0	0	0	0	0	0	0	0	4	53.9	35.4	8.8	48.105	432	432;403;403;422;422	1	22
CON__Q9UE12;CON__Q15323;CON__Q14525;CON__Q497I4;Q497I4;CON__Q6NTB9;CON__O76009	CON__Q9UE12;CON__Q15323;CON__Q14525;CON__Q497I4;Q497I4;CON__Q6NTB9;CON__O76009	4;4;3;3;3;2;2	3;3;2;2;2;2;2	0;0;0;0;0;0;0	Keratin, type I cuticular Ha5	Krt35	;;;;sp|Q497I4|KRT35_MOUSE Keratin, type I cuticular Ha5 OS=Mus musculus OX=10090 GN=Krt35 PE=1 SV=1;;	7	4	3	0	2	3	2	1	2	2	2	3	1	4	1	2	1	0	1	1	1	2	0	3	0	0	0	0	0	0	0	0	0	0	9.1	7.5	0	47.237	416	416;416;404;455;455;404;404	1	12
CON__Q1RMK2	CON__Q1RMK2	10	10	10				1	10	10	10	7	7	7	8	9	8	10	9	5	8	7	7	7	8	9	8	10	9	5	8	7	7	7	8	9	8	10	9	5	8	21.3	21.3	21.3	65.056	597	597	1	102
CON__Q3SX09;P02089	CON__Q3SX09	5;1	2;0	2;0				2	5	2	2	3	4	4	3	4	2	2	3	0	4	1	1	2	1	1	1	1	1	0	1	1	1	2	1	1	1	1	1	0	1	27.4	11.4	11.4	22.06	201	201;147	1	10
CON__Q3ZBS7	CON__Q3ZBS7	5	5	5				1	5	5	5	2	4	5	5	5	3	2	3	0	1	2	4	5	5	5	3	2	3	0	1	2	4	5	5	5	3	2	3	0	1	11.4	11.4	11.4	54.099	484	484	1	32
CON__Q5D862	CON__Q5D862	10	10	10				1	10	10	10	7	2	2	3	9	4	8	1	1	10	7	2	2	3	9	4	8	1	1	10	7	2	2	3	9	4	8	1	1	10	11.6	11.6	11.6	248.07	2391	2391	1	49
CON__Q5XKE5	CON__Q5XKE5	16	4	3				1	16	4	3	9	8	8	12	12	11	11	8	10	16	0	0	0	0	1	1	0	0	0	4	0	0	0	0	1	1	0	0	0	3	21.3	8.4	6.7	57.809	535	535	1	6
CON__Q9NSB2;CON__Q6ISB0	CON__Q9NSB2;CON__Q6ISB0	9;9	4;4	3;3			;	2	9	4	3	4	7	4	5	4	4	5	3	2	6	0	4	0	0	0	0	1	0	0	1	0	3	0	0	0	0	0	0	0	0	14.5	10.5	8.5	64.895	600	600;600	1	6
CON__Q6KB66-1;CON__Q0VBK2;Q0VBK2	CON__Q6KB66-1	8;3;3	8;3;3	8;3;3				3	8	8	8	1	0	0	0	6	0	4	0	1	6	1	0	0	0	6	0	4	0	1	6	1	0	0	0	6	0	4	0	1	6	19.9	19.9	19.9	50.525	452	452;452;452	1	19
CON__Q8N1N4-2;CON__Q7RTT2	CON__Q8N1N4-2;CON__Q7RTT2	16;16	12;12	11;11			;	2	16	12	11	5	1	2	2	14	2	6	1	4	13	4	0	0	0	12	1	5	0	3	9	4	0	0	0	11	1	5	0	3	8	29.9	28.2	26.3	56.964	521	521;521	1	38
CON__Q7Z794	CON__Q7Z794	24	18	13				1	24	18	13	11	4	5	5	18	6	15	3	6	19	6	0	0	0	12	1	9	1	1	14	5	0	0	0	8	0	6	0	1	10	37.5	32.7	25.1	61.802	578	578	1	46
CON__Q86YZ3	CON__Q86YZ3	2	2	2				1	2	2	2	2	1	2	2	2	2	2	2	2	2	2	1	2	2	2	2	2	2	2	2	2	1	2	2	2	2	2	2	2	2	4.5	4.5	4.5	282.39	2850	2850	1	25
CON__Q9C075	CON__Q9C075	4	2	2				1	4	2	2	1	1	1	1	3	1	3	1	0	4	0	0	0	0	1	0	2	0	0	2	0	0	0	0	1	0	2	0	0	2	13.3	9.5	9.5	48.131	422	422	1	5
CON__Q9NSB4;Q99M74	CON__Q9NSB4;Q99M74	2;2	1;1	1;1	Keratin, type II cuticular Hb2	Krt82	;sp|Q99M74|KRT82_MOUSE Keratin, type II cuticular Hb2 OS=Mus musculus OX=10090 GN=Krt82 PE=1 SV=2	2	2	1	1	0	1	0	0	0	0	1	0	0	2	0	0	0	0	0	0	0	0	0	1	0	0	0	0	0	0	0	0	0	1	4.3	1.9	1.9	56.682	513	513;516	1	1
CON__Streptavidin	CON__Streptavidin	1	1	1				1	1	1	1	1	1	1	1	1	1	1	1	1	0	1	1	1	1	1	1	1	1	1	0	1	1	1	1	1	1	1	1	1	0	11.9	11.9	11.9	16.622	160	160	1	11
D3YVV7;Q9JKN6	D3YVV7	11;2	11;2	11;2		Nova2	tr|D3YVV7|D3YVV7_MOUSE NOVA alternative-splicing regulator 2 OS=Mus musculus OX=10090 GN=Nova2 PE=1 SV=3	2	11	11	11	5	8	9	5	4	9	9	10	2	10	5	8	9	5	4	9	9	10	2	10	5	8	9	5	4	9	9	10	2	10	31.3	31.3	31.3	55.676	556	556;507	1	80
D3YXK2;B1AR51	D3YXK2	34;1	34;1	24;0	Scaffold attachment factor B1	Safb	sp|D3YXK2|SAFB1_MOUSE Scaffold attachment factor B1 OS=Mus musculus OX=10090 GN=Safb PE=1 SV=2	2	34	34	24	21	26	26	24	24	28	28	31	16	33	21	26	26	24	24	28	28	31	16	33	13	17	18	16	16	19	19	21	10	23	36	36	25.5	105.1	937	937;4484	1	325
D3YZZ5	D3YZZ5	4	4	4		Tmed7	tr|D3YZZ5|D3YZZ5_MOUSE Transmembrane p24-trafficking protein 7 OS=Mus musculus OX=10090 GN=Tmed7 PE=1 SV=1	1	4	4	4	3	4	3	3	2	0	1	1	2	1	3	4	3	3	2	0	1	1	2	1	3	4	3	3	2	0	1	1	2	1	24.1	24.1	24.1	25.2	224	224	1	20
D3Z0K6	D3Z0K6	11	11	11		Rsbn1l	tr|D3Z0K6|D3Z0K6_MOUSE Round spermatid basic protein 1-like OS=Mus musculus OX=10090 GN=Rsbn1l PE=1 SV=1	1	11	11	11	5	5	6	4	4	7	6	9	2	7	5	5	6	4	4	7	6	9	2	7	5	5	6	4	4	7	6	9	2	7	22	22	22	91.745	821	821	1	56
D3Z0M9	D3Z0M9	22	22	22		Ddx23	tr|D3Z0M9|D3Z0M9_MOUSE RNA helicase OS=Mus musculus OX=10090 GN=Ddx23 PE=1 SV=1	1	22	22	22	10	15	11	10	14	18	17	19	13	19	10	15	11	10	14	18	17	19	13	19	10	15	11	10	14	18	17	19	13	19	31.4	31.4	31.4	95.493	819	819	1	155
D3Z2H9	D3Z2H9	13	13	7		Tpm3-rs7	tr|D3Z2H9|D3Z2H9_MOUSE Tropomyosin 3, related sequence 7 OS=Mus musculus OX=10090 GN=Tpm3-rs7 PE=3 SV=1	1	13	13	7	5	6	6	10	9	11	11	11	12	9	5	6	6	10	9	11	11	11	12	9	2	3	2	5	4	6	6	6	6	5	42.3	42.3	25.8	28.991	248	248	1	102
D3Z3H0	D3Z3H0	3	3	3		Ino80e	tr|D3Z3H0|D3Z3H0_MOUSE INO80 complex subunit E OS=Mus musculus OX=10090 GN=Ino80e PE=1 SV=1	1	3	3	3	3	3	2	2	2	3	1	3	0	2	3	3	2	2	2	3	1	3	0	2	3	3	2	2	2	3	1	3	0	2	18.4	18.4	18.4	26.416	244	244	1	21
D3Z3N4	D3Z3N4	14	12	12		Hnrnph3	tr|D3Z3N4|D3Z3N4_MOUSE Heterogeneous nuclear ribonucleoprotein H3 OS=Mus musculus OX=10090 GN=Hnrnph3 PE=1 SV=1	1	14	12	12	8	10	8	6	7	13	10	14	6	13	7	9	7	5	6	11	8	12	4	11	7	9	7	5	6	11	8	12	4	11	52	49.1	49.1	36.869	346	346	1	104
D3Z4I3;Q62176	D3Z4I3;Q62176	4;4	4;4	4;4	RNA-binding protein 24;RNA-binding protein 38	Rbm24;Rbm38	sp|D3Z4I3|RBM24_MOUSE RNA-binding protein 24 OS=Mus musculus OX=10090 GN=Rbm24 PE=1 SV=1;sp|Q62176|RBM38_MOUSE RNA-binding protein 38 OS=Mus musculus OX=10090 GN=Rbm38 PE=1 SV=2	2	4	4	4	3	4	4	3	3	4	4	4	2	3	3	4	4	3	3	4	4	4	2	3	3	4	4	3	3	4	4	4	2	3	16.9	16.9	16.9	24.822	236	236;237	1	48
D3Z7P3	D3Z7P3	9	9	9	Glutaminase kidney isoform, mitochondrial	Gls	sp|D3Z7P3|GLSK_MOUSE Glutaminase kidney isoform, mitochondrial OS=Mus musculus OX=10090 GN=Gls PE=1 SV=1	1	9	9	9	4	8	6	3	4	6	3	7	1	7	4	8	6	3	4	6	3	7	1	7	4	8	6	3	4	6	3	7	1	7	22.4	22.4	22.4	73.963	674	674	1	50
D3Z7X0	D3Z7X0	12	12	3		Acad12	tr|D3Z7X0|D3Z7X0_MOUSE Acyl-Coenzyme A dehydrogenase family, member 12 OS=Mus musculus OX=10090 GN=Acad12 PE=1 SV=1	1	12	12	3	7	11	12	10	8	10	8	10	6	10	7	11	12	10	8	10	8	10	6	10	1	2	3	2	2	1	0	1	1	1	26.7	26.7	7.9	61.389	555	555	1	92
E0CZ26	E0CZ26	4	4	4		Kctd18	tr|E0CZ26|E0CZ26_MOUSE Potassium channel tetramerisation domain-containing 18 OS=Mus musculus OX=10090 GN=Kctd18 PE=1 SV=1	1	4	4	4	0	1	0	1	0	3	2	3	0	4	0	1	0	1	0	3	2	3	0	4	0	1	0	1	0	3	2	3	0	4	13.5	13.5	13.5	46.973	429	429	1	14
E9PUA5;Q9QWT9	E9PUA5;Q9QWT9	6;6	6;6	6;6	Kinesin-like protein;Kinesin-like protein KIFC1	Kifc5b;Kifc1	tr|E9PUA5|E9PUA5_MOUSE Kinesin-like protein OS=Mus musculus OX=10090 GN=Kifc5b PE=1 SV=1;sp|Q9QWT9|KIFC1_MOUSE Kinesin-like protein KIFC1 OS=Mus musculus OX=10090 GN=Kifc1 PE=1 SV=2	2	6	6	6	1	3	2	0	1	2	2	4	4	5	1	3	2	0	1	2	2	4	4	5	1	3	2	0	1	2	2	4	4	5	10.6	10.6	10.6	73.681	672	672;674	1	24
E9PV26	E9PV26	1	1	1		Prr36	tr|E9PV26|E9PV26_MOUSE Proline-rich 36 OS=Mus musculus OX=10090 GN=Prr36 PE=1 SV=1	1	1	1	1	0	0	0	0	0	0	1	1	0	1	0	0	0	0	0	0	1	1	0	1	0	0	0	0	0	0	1	1	0	1	1.8	1.8	1.8	110.69	1098	1098	1	3
E9PVA8	E9PVA8	55	55	55		Gcn1l1	sp|E9PVA8|GCN1_MOUSE eIF-2-alpha kinase activator GCN1 OS=Mus musculus OX=10090 GN=Gcn1 PE=1 SV=1	1	55	55	55	32	45	17	21	20	38	29	30	8	39	32	45	17	21	20	38	29	30	8	39	32	45	17	21	20	38	29	30	8	39	29.3	29.3	29.3	293.02	2671	2671	1	301
E9PVX6	E9PVX6	66	66	66		Mki67	sp|E9PVX6|KI67_MOUSE Proliferation marker protein Ki-67 OS=Mus musculus OX=10090 GN=Mki67 PE=1 SV=1	1	66	66	66	40	47	50	44	43	57	52	48	29	46	40	47	50	44	43	57	52	48	29	46	40	47	50	44	43	57	52	48	29	46	29.8	29.8	29.8	350.86	3177	3177	1	464
E9PVZ8	E9PVZ8	3	2	2		Golgb1	tr|E9PVZ8|E9PVZ8_MOUSE Golgi autoantigen, golgin subfamily b, macrogolgin 1 OS=Mus musculus OX=10090 GN=Golgb1 PE=1 SV=1	1	3	2	2	1	1	2	0	1	1	1	2	0	2	0	1	1	0	0	0	0	1	0	1	0	1	1	0	0	0	0	1	0	1	0.9	0.7	0.7	370.15	3238	3238	1	4
E9PW37	E9PW37	4	4	3		Rasal2	tr|E9PW37|E9PW37_MOUSE RAS protein activator-like 2 OS=Mus musculus OX=10090 GN=Rasal2 PE=1 SV=1	1	4	4	3	0	1	1	1	0	3	1	3	1	4	0	1	1	1	0	3	1	3	1	4	0	1	1	1	0	3	1	3	1	3	4.2	4.2	3	144.59	1286	1286	1	15
E9PW43;Q9CQS8	E9PW43;Q9CQS8	1;1	1;1	1;1	Protein transport protein Sec61 subunit beta	Gm10320;Sec61b	tr|E9PW43|E9PW43_MOUSE Predicted pseudogene 10320 OS=Mus musculus OX=10090 GN=Gm10320 PE=3 SV=1;sp|Q9CQS8|SC61B_MOUSE Protein transport protein Sec61 subunit beta OS=Mus musculus OX=10090 GN=Sec61b PE=1 SV=3	2	1	1	1	1	1	1	0	1	1	0	0	0	0	1	1	1	0	1	1	0	0	0	0	1	1	1	0	1	1	0	0	0	0	9.7	9.7	9.7	11.788	113	113;96	1	6
E9PWG6	E9PWG6	21	21	21		Ncapg	tr|E9PWG6|E9PWG6_MOUSE Non-SMC condensin I complex, subunit G OS=Mus musculus OX=10090 GN=Ncapg PE=1 SV=1	1	21	21	21	12	15	12	12	12	16	12	17	8	19	12	15	12	12	12	16	12	17	8	19	12	15	12	12	12	16	12	17	8	19	28.8	28.8	28.8	112.87	1004	1004	1	143
E9PX68	E9PX68	16	16	16		Slc4a1ap	tr|E9PX68|E9PX68_MOUSE Solute carrier family 4 (anion exchanger), member 1, adaptor protein OS=Mus musculus OX=10090 GN=Slc4a1ap PE=1 SV=1	1	16	16	16	3	9	11	7	5	13	12	11	4	15	3	9	11	7	5	13	12	11	4	15	3	9	11	7	5	13	12	11	4	15	30.6	30.6	30.6	82.886	744	744	1	92
E9Q7E4;E9PXN1;Q91X93	E9Q7E4;E9PXN1;Q91X93	1;1;1	1;1;1	1;1;1		Gm8882;Prpmp5;Prb1	tr|E9Q7E4|E9Q7E4_MOUSE Predicted gene 8882 OS=Mus musculus OX=10090 GN=Gm8882 PE=4 SV=1;tr|E9PXN1|E9PXN1_MOUSE Proline-rich protein MP5 OS=Mus musculus OX=10090 GN=Prpmp5 PE=4 SV=1;tr|Q91X93|Q91X93_MOUSE Proline-rich protein BstNI subfamily 1 OS=Mus muscul	3	1	1	1	0	0	0	1	1	1	1	1	1	1	0	0	0	1	1	1	1	1	1	1	0	0	0	1	1	1	1	1	1	1	17	17	17	29.623	283	283;296;504	1	7
E9PY43	E9PY43	4	4	4		Erich1	tr|E9PY43|E9PY43_MOUSE Glutamate-rich 1 OS=Mus musculus OX=10090 GN=Erich1 PE=1 SV=1	1	4	4	4	0	1	2	1	1	2	1	2	0	3	0	1	2	1	1	2	1	2	0	3	0	1	2	1	1	2	1	2	0	3	13.6	13.6	13.6	37.35	332	332	1	13
E9PY46	E9PY46	3	3	3		Ift140	sp|E9PY46|IF140_MOUSE Intraflagellar transport protein 140 homolog OS=Mus musculus OX=10090 GN=Ift140 PE=1 SV=1	1	3	3	3	1	2	1	1	1	1	0	0	1	1	1	2	1	1	1	1	0	0	1	1	1	2	1	1	1	1	0	0	1	1	2.5	2.5	2.5	165.87	1464	1464	1	9
E9PYH6	E9PYH6	14	14	14	Histone-lysine N-methyltransferase	Setd1a	sp|E9PYH6|SET1A_MOUSE Histone-lysine N-methyltransferase SETD1A OS=Mus musculus OX=10090 GN=Setd1a PE=1 SV=1	1	14	14	14	3	6	4	4	2	10	9	10	2	14	3	6	4	4	2	10	9	10	2	14	3	6	4	4	2	10	9	10	2	14	12.2	12.2	12.2	186.06	1716	1716	1	64
E9PYL2	E9PYL2	12	12	12		Prr12	sp|E9PYL2|PRR12_MOUSE Proline-rich protein 12 OS=Mus musculus OX=10090 GN=Prr12 PE=1 SV=1	1	12	12	12	5	9	4	2	3	11	7	11	2	9	5	9	4	2	3	11	7	11	2	9	5	9	4	2	3	11	7	11	2	9	9.4	9.4	9.4	211.87	2035	2035	1	63
E9PZJ8	E9PZJ8	29	29	29	Activating signal cointegrator 1 complex subunit 3	Ascc3	sp|E9PZJ8|ASCC3_MOUSE Activating signal cointegrator 1 complex subunit 3 OS=Mus musculus OX=10090 GN=Ascc3 PE=1 SV=1	1	29	29	29	9	14	12	9	6	20	16	20	1	22	9	14	12	9	6	20	16	20	1	22	9	14	12	9	6	20	16	20	1	22	18.7	18.7	18.7	250.55	2198	2198	1	130
E9PZM7	E9PZM7	9	9	9		Scaf11	tr|E9PZM7|E9PZM7_MOUSE SR-related CTD-associated factor 11 OS=Mus musculus OX=10090 GN=Scaf11 PE=1 SV=1	1	9	9	9	5	6	5	5	6	5	5	5	2	8	5	6	5	5	6	5	5	5	2	8	5	6	5	5	6	5	5	5	2	8	8	8	8	162.1	1456	1456	1	52
E9Q1F5	E9Q1F5	3	2	2		Myo5c	tr|E9Q1F5|E9Q1F5_MOUSE Myosin VC OS=Mus musculus OX=10090 GN=Myo5c PE=1 SV=1	1	3	2	2	1	2	1	0	0	2	0	1	1	2	0	1	0	0	0	1	0	1	1	2	0	1	0	0	0	1	0	1	1	2	2.8	1.3	1.3	202.7	1742	1742	1	7
E9Q1P8	E9Q1P8	14	10	10	Interferon regulatory factor 2-binding protein 2	Irf2bp2	sp|E9Q1P8|I2BP2_MOUSE Interferon regulatory factor 2-binding protein 2 OS=Mus musculus OX=10090 GN=Irf2bp2 PE=1 SV=1	1	14	10	10	4	7	7	5	4	8	9	9	3	13	3	4	4	3	2	5	6	6	1	9	3	4	4	3	2	5	6	6	1	9	38.8	28.2	28.2	59.291	570	570	1	43
E9Q2I4	E9Q2I4	22	22	22		Elmsan1	tr|E9Q2I4|E9Q2I4_MOUSE Mitotic deacetylase-associated SANT domain protein OS=Mus musculus OX=10090 GN=Mideas PE=1 SV=1	1	22	22	22	10	13	11	8	10	12	12	13	0	18	10	13	11	8	10	12	12	13	0	18	10	13	11	8	10	12	12	13	0	18	30	30	30	119.72	1089	1089	1	115
E9Q394	E9Q394	4	4	4		Akap13	sp|E9Q394|AKP13_MOUSE A-kinase anchor protein 13 OS=Mus musculus OX=10090 GN=Akap13 PE=1 SV=1	1	4	4	4	2	1	1	1	1	3	1	0	0	3	2	1	1	1	1	3	1	0	0	3	2	1	1	1	1	3	1	0	0	3	1.7	1.7	1.7	303.97	2776	2776	1	13
E9Q3G8	E9Q3G8	7	7	7		Nup153	tr|E9Q3G8|E9Q3G8_MOUSE Nucleoporin 153 OS=Mus musculus OX=10090 GN=Nup153 PE=1 SV=1	1	7	7	7	6	5	5	5	2	4	2	2	0	3	6	5	5	5	2	4	2	2	0	3	6	5	5	5	2	4	2	2	0	3	6.1	6.1	6.1	152.01	1462	1462	1	34
E9Q3P4	E9Q3P4	30	30	30		Cenpf	tr|E9Q3P4|E9Q3P4_MOUSE Centromere protein F OS=Mus musculus OX=10090 GN=Cenpf PE=1 SV=1	1	30	30	30	3	3	2	0	0	22	15	21	6	22	3	3	2	0	0	22	15	21	6	22	3	3	2	0	0	22	15	21	6	22	13.1	13.1	13.1	342.47	2997	2997	1	94
E9Q3S4	E9Q3S4	2	2	2	Mitogen-activated protein kinase kinase kinase 19	Map3k19	sp|E9Q3S4|M3K19_MOUSE Mitogen-activated protein kinase kinase kinase 19 OS=Mus musculus OX=10090 GN=Map3k19 PE=3 SV=1	1	2	2	2	0	2	2	1	1	1	2	1	1	1	0	2	2	1	1	1	2	1	1	1	0	2	2	1	1	1	2	1	1	1	2	2	2	146.41	1311	1311	1	12
E9Q4F7	E9Q4F7	17	17	16		Ankrd11	sp|E9Q4F7|ANR11_MOUSE Ankyrin repeat domain-containing protein 11 OS=Mus musculus OX=10090 GN=Ankrd11 PE=1 SV=1	1	17	17	16	7	7	8	8	6	17	9	13	3	11	7	7	8	8	6	17	9	13	3	11	6	6	7	7	5	16	8	12	3	10	9.5	9.5	9	296.18	2643	2643	1	94
E9Q4N7	E9Q4N7	23	20	20		Arid1b	sp|E9Q4N7|ARI1B_MOUSE AT-rich interactive domain-containing protein 1B OS=Mus musculus OX=10090 GN=Arid1b PE=1 SV=1	1	23	20	20	13	17	12	12	11	17	12	20	0	18	10	14	10	9	8	14	9	17	0	16	10	14	10	9	8	14	9	17	0	16	14.8	13.1	13.1	237.79	2244	2244	1	107
E9Q4P1	E9Q4P1	10	10	10		Wdfy1	sp|E9Q4P1|WDFY1_MOUSE WD repeat and FYVE domain-containing protein 1 OS=Mus musculus OX=10090 GN=Wdfy1 PE=1 SV=1	1	10	10	10	5	5	7	4	4	7	5	8	2	10	5	5	7	4	4	7	5	8	2	10	5	5	7	4	4	7	5	8	2	10	32.9	32.9	32.9	46.217	410	410	1	58
E9Q4Y8	E9Q4Y8	6	6	6		8030474K03Rik	tr|E9Q4Y8|E9Q4Y8_MOUSE RIKEN cDNA 8030474K03 gene OS=Mus musculus OX=10090 GN=8030474K03Rik PE=1 SV=2	1	6	6	6	2	1	3	0	0	4	4	5	1	5	2	1	3	0	0	4	4	5	1	5	2	1	3	0	0	4	4	5	1	5	24.4	24.4	24.4	58.697	554	554	1	25
E9Q512	E9Q512	1	1	1		Trip11	tr|E9Q512|E9Q512_MOUSE Thyroid hormone receptor interactor 11 OS=Mus musculus OX=10090 GN=Trip11 PE=1 SV=1	1	1	1	1	0	0	0	0	0	0	0	1	0	1	0	0	0	0	0	0	0	1	0	1	0	0	0	0	0	0	0	1	0	1	0.7	0.7	0.7	226.45	1976	1976	1	2
E9Q555	E9Q555	127	127	127	E3 ubiquitin-protein ligase RNF213	Rnf213	sp|E9Q555|RN213_MOUSE E3 ubiquitin-protein ligase RNF213 OS=Mus musculus OX=10090 GN=Rnf213 PE=1 SV=2	1	127	127	127	78	78	72	78	82	107	110	99	80	76	78	78	72	78	82	107	110	99	80	76	78	78	72	78	82	107	110	99	80	76	31.6	31.6	31.6	584.78	5152	5152	1	913
E9Q557	E9Q557	37	37	37	Desmoplakin	Dsp	sp|E9Q557|DESP_MOUSE Desmoplakin OS=Mus musculus OX=10090 GN=Dsp PE=1 SV=1	1	37	37	37	8	3	1	2	30	4	25	4	8	28	8	3	1	2	30	4	25	4	8	28	8	3	1	2	30	4	25	4	8	28	13.2	13.2	13.2	332.91	2883	2883	1	134
E9Q5C9	E9Q5C9	16	16	16		Nolc1	sp|E9Q5C9|NOLC1_MOUSE Nucleolar and coiled-body phosphoprotein 1 OS=Mus musculus OX=10090 GN=Nolc1 PE=1 SV=1	1	16	16	16	11	13	15	13	13	16	16	16	9	13	11	13	15	13	13	16	16	16	9	13	11	13	15	13	13	16	16	16	9	13	23.6	23.6	23.6	73.697	702	702	1	152
E9Q5F9	E9Q5F9	3	3	3	Histone-lysine N-methyltransferase SETD2	Setd2	sp|E9Q5F9|SETD2_MOUSE Histone-lysine N-methyltransferase SETD2 OS=Mus musculus OX=10090 GN=Setd2 PE=1 SV=1	1	3	3	3	0	0	0	0	0	0	0	1	0	3	0	0	0	0	0	0	0	1	0	3	0	0	0	0	0	0	0	1	0	3	2.4	2.4	2.4	285.66	2537	2537	1	4
E9Q5G3	E9Q5G3	2	2	2	Kinesin-like protein KIF23	Kif23	sp|E9Q5G3|KIF23_MOUSE Kinesin-like protein KIF23 OS=Mus musculus OX=10090 GN=Kif23 PE=1 SV=1	1	2	2	2	0	1	0	2	1	2	2	2	2	2	0	1	0	2	1	2	2	2	2	2	0	1	0	2	1	2	2	2	2	2	3.6	3.6	3.6	108.77	953	953	1	14
E9Q5K2	E9Q5K2	1	1	1		Gm17728	tr|E9Q5K2|E9Q5K2_MOUSE Predicted gene, 17728 OS=Mus musculus OX=10090 GN=Gm17728 PE=4 SV=1	1	1	1	1	1	1	1	1	1	1	1	0	1	0	1	1	1	1	1	1	1	0	1	0	1	1	1	1	1	1	1	0	1	0	6.8	6.8	6.8	14.977	132	132	1	8
E9Q5K9	E9Q5K9	4	4	4	YTH domain-containing protein 1	Ythdc1	sp|E9Q5K9|YTDC1_MOUSE YTH domain-containing protein 1 OS=Mus musculus OX=10090 GN=Ythdc1 PE=1 SV=2	1	4	4	4	1	2	1	1	1	2	1	2	1	4	1	2	1	1	1	2	1	2	1	4	1	2	1	1	1	2	1	2	1	4	6.7	6.7	6.7	85.648	736	736	1	17
E9Q616	E9Q616	171	171	171		Ahnak	tr|E9Q616|E9Q616_MOUSE AHNAK nucleoprotein (desmoyokin) OS=Mus musculus OX=10090 GN=Ahnak PE=1 SV=1	1	171	171	171	78	93	103	79	88	146	148	144	77	131	78	93	103	79	88	146	148	144	77	131	78	93	103	79	88	146	148	144	77	131	61.8	61.8	61.8	604.25	5656	5656	1	1187
E9Q6B2	E9Q6B2	4	4	4	Coiled-coil domain-containing protein 85C	Ccdc85c	sp|E9Q6B2|CC85C_MOUSE Coiled-coil domain-containing protein 85C OS=Mus musculus OX=10090 GN=Ccdc85c PE=1 SV=1	1	4	4	4	1	2	2	0	1	3	1	2	1	4	1	2	2	0	1	3	1	2	1	4	1	2	2	0	1	3	1	2	1	4	11.9	11.9	11.9	45.333	420	420	1	17
E9Q6E5	E9Q6E5	9	9	9		Srsf11	tr|E9Q6E5|E9Q6E5_MOUSE Serine and arginine-rich-splicing factor 11 OS=Mus musculus OX=10090 GN=Srsf11 PE=1 SV=1	1	9	9	9	5	7	6	6	5	7	6	7	2	7	5	7	6	6	5	7	6	7	2	7	5	7	6	6	5	7	6	7	2	7	21.1	21.1	21.1	56.697	511	511	1	86
E9Q6J5;Q5SQY2	E9Q6J5	17;1	17;1	17;1		Bod1l	sp|E9Q6J5|BD1L1_MOUSE Biorientation of chromosomes in cell division protein 1-like 1 OS=Mus musculus OX=10090 GN=Bod1l PE=1 SV=1	2	17	17	17	8	9	10	8	5	13	17	16	6	9	8	9	10	8	5	13	17	16	6	9	8	9	10	8	5	13	17	16	6	9	8.3	8.3	8.3	327.45	3032	3032;173	1	101
E9Q6R7	E9Q6R7	26	26	26		Utrn	tr|E9Q6R7|E9Q6R7_MOUSE Utrophin OS=Mus musculus OX=10090 GN=Utrn PE=1 SV=1	1	26	26	26	15	10	14	11	8	13	13	18	3	25	15	10	14	11	8	13	13	18	3	25	15	10	14	11	8	13	13	18	3	25	10.2	10.2	10.2	392.7	3430	3430	1	131
E9Q735	E9Q735	3	3	3	Ubiquitin conjugation factor E4 A	Ube4a	sp|E9Q735|UBE4A_MOUSE Ubiquitin conjugation factor E4 A OS=Mus musculus OX=10090 GN=Ube4a PE=1 SV=1	1	3	3	3	1	2	2	2	1	2	2	2	0	1	1	2	2	2	1	2	2	2	0	1	1	2	2	2	1	2	2	2	0	1	4.8	4.8	4.8	118.2	1028	1028	1	15
E9Q784	E9Q784	24	24	24		Zc3h13	sp|E9Q784|ZC3HD_MOUSE Zinc finger CCCH domain-containing protein 13 OS=Mus musculus OX=10090 GN=Zc3h13 PE=1 SV=1	1	24	24	24	15	15	14	13	12	20	18	19	8	18	15	15	14	13	12	20	18	19	8	18	15	15	14	13	12	20	18	19	8	18	14.3	14.3	14.3	203.75	1729	1729	1	168
E9Q7E2	E9Q7E2	29	29	29		Arid2	sp|E9Q7E2|ARID2_MOUSE AT-rich interactive domain-containing protein 2 OS=Mus musculus OX=10090 GN=Arid2 PE=1 SV=1	1	29	29	29	10	14	10	8	7	24	15	21	2	24	10	14	10	8	7	24	15	21	2	24	10	14	10	8	7	24	15	21	2	24	22.2	22.2	22.2	195.99	1828	1828	1	137
E9Q7G0	E9Q7G0	71	71	71		Numa1	sp|E9Q7G0|NUMA1_MOUSE Nuclear mitotic apparatus protein 1 OS=Mus musculus OX=10090 GN=Numa1 PE=1 SV=1	1	71	71	71	46	60	56	53	50	58	53	46	31	53	46	60	56	53	50	58	53	46	31	53	46	60	56	53	50	58	53	46	31	53	43	43	43	235.63	2094	2094	1	559
E9Q7L1	E9Q7L1	3	3	3		Urb2	tr|E9Q7L1|E9Q7L1_MOUSE URB2 ribosome biogenesis 2 homolog (S. cerevisiae) OS=Mus musculus OX=10090 GN=Urb2 PE=1 SV=1	1	3	3	3	1	2	0	0	0	2	1	0	0	2	1	2	0	0	0	2	1	0	0	2	1	2	0	0	0	2	1	0	0	2	3.1	3.1	3.1	171.62	1524	1524	1	8
E9Q8D0	E9Q8D0	2	2	2		Dnajc21	sp|E9Q8D0|DJC21_MOUSE DnaJ homolog subfamily C member 21 OS=Mus musculus OX=10090 GN=Dnajc21 PE=1 SV=1	1	2	2	2	1	0	1	1	0	1	0	0	0	2	1	0	1	1	0	1	0	0	0	2	1	0	1	1	0	1	0	0	0	2	7.2	7.2	7.2	61.734	531	531	1	6
E9Q8X5	E9Q8X5	5	5	5		Zbtb10	tr|E9Q8X5|E9Q8X5_MOUSE Zinc finger and BTB domain-containing 10 OS=Mus musculus OX=10090 GN=Zbtb10 PE=1 SV=1	1	5	5	5	3	4	4	4	3	5	4	4	1	1	3	4	4	4	3	5	4	4	1	1	3	4	4	4	3	5	4	4	1	1	9.1	9.1	9.1	94.044	861	861	1	33
E9Q912	E9Q912	4	4	4		Rap1gds1	sp|E9Q912|GDS1_MOUSE Rap1 GTPase-GDP dissociation stimulator 1 OS=Mus musculus OX=10090 GN=Rap1gds1 PE=2 SV=1	1	4	4	4	0	1	0	0	0	2	1	2	0	4	0	1	0	0	0	2	1	2	0	4	0	1	0	0	0	2	1	2	0	4	9.6	9.6	9.6	66.076	607	607	1	11
E9QA15	E9QA15	15	15	15		Cald1	tr|E9QA15|E9QA15_MOUSE Caldesmon 1 OS=Mus musculus OX=10090 GN=Cald1 PE=1 SV=1	1	15	15	15	8	6	8	10	8	11	12	11	10	12	8	6	8	10	8	11	12	11	10	12	8	6	8	10	8	11	12	11	10	12	19.7	19.7	19.7	89.272	768	768	1	101
E9QAP7;G5E8Z2	E9QAP7	13;1	13;1	13;1		Taf4a	tr|E9QAP7|E9QAP7_MOUSE TATA-box-binding protein-associated factor 4 OS=Mus musculus OX=10090 GN=Taf4 PE=1 SV=1	2	13	13	13	3	6	3	1	3	9	7	9	1	11	3	6	3	1	3	9	7	9	1	11	3	6	3	1	3	9	7	9	1	11	21.9	21.9	21.9	105.31	1042	1042;850	1	53
E9QAT4	E9QAT4	10	10	10		Sec16a	sp|E9QAT4|SC16A_MOUSE Protein transport protein Sec16A OS=Mus musculus OX=10090 GN=Sec16a PE=1 SV=1	1	10	10	10	6	8	9	5	5	8	9	7	1	6	6	8	9	5	5	8	9	7	1	6	6	8	9	5	5	8	9	7	1	6	6.1	6.1	6.1	254.2	2357	2357	1	70
F6ZDS4;REV__Q922Q6;Q922Q6	F6ZDS4	92;1;1	92;1;1	90;0;0	Nucleoprotein TPR	Tpr	sp|F6ZDS4|TPR_MOUSE Nucleoprotein TPR OS=Mus musculus OX=10090 GN=Tpr PE=1 SV=1	3	92	92	90	52	77	72	63	69	76	76	79	49	73	52	77	72	63	69	76	76	79	49	73	51	76	71	62	67	75	75	78	48	72	44.5	44.5	44.3	273.99	2431	2431;247;247	1	809
F7BJB9	F7BJB9	25	25	25		Morc3	sp|F7BJB9|MORC3_MOUSE MORC family CW-type zinc finger protein 3 OS=Mus musculus OX=10090 GN=Morc3 PE=1 SV=1	1	25	25	25	10	15	15	12	9	16	15	15	7	23	10	15	15	12	9	16	15	15	7	23	10	15	15	12	9	16	15	15	7	23	37.8	37.8	37.8	106.52	942	942	1	146
F8VPJ6	F8VPJ6	1	1	1		Rfx7	tr|F8VPJ6|F8VPJ6_MOUSE Regulatory factor X, 7 OS=Mus musculus OX=10090 GN=Rfx7 PE=1 SV=1	1	1	1	1	0	1	1	0	0	1	1	1	0	1	0	1	1	0	0	1	1	1	0	1	0	1	1	0	0	1	1	1	0	1	1.1	1.1	1.1	157.64	1459	1459	1	6
F8VPK0	F8VPK0	3	3	3		Ttc37	tr|F8VPK0|F8VPK0_MOUSE Tetratricopeptide repeat domain 37 OS=Mus musculus OX=10090 GN=Ttc37 PE=1 SV=1	1	3	3	3	0	0	0	0	0	3	2	3	1	2	0	0	0	0	0	3	2	3	1	2	0	0	0	0	0	3	2	3	1	2	2.3	2.3	2.3	173.94	1563	1563	1	11
F8VPP8	F8VPP8	3	3	3		Zc3h7b	tr|F8VPP8|F8VPP8_MOUSE Zinc finger CCCH type-containing 7B OS=Mus musculus OX=10090 GN=Zc3h7b PE=1 SV=1	1	3	3	3	1	1	1	0	1	2	1	2	0	2	1	1	1	0	1	2	1	2	0	2	1	1	1	0	1	2	1	2	0	2	3.6	3.6	3.6	110.29	982	982	1	11
F8VPQ2	F8VPQ2	3	3	3		Arid4a	sp|F8VPQ2|ARI4A_MOUSE AT-rich interactive domain-containing protein 4A OS=Mus musculus OX=10090 GN=Arid4a PE=1 SV=1	1	3	3	3	2	3	1	1	1	2	2	1	0	2	2	3	1	1	1	2	2	1	0	2	2	3	1	1	1	2	2	1	0	2	2.6	2.6	2.6	142.05	1261	1261	1	15
F8VPZ9	F8VPZ9	2	2	2		Gltscr1	sp|F8VPZ9|BICRA_MOUSE BRD4-interacting chromatin-remodeling complex-associated protein OS=Mus musculus OX=10090 GN=Bicra PE=1 SV=1	1	2	2	2	1	1	2	1	0	0	0	2	0	1	1	1	2	1	0	0	0	2	0	1	1	1	2	1	0	0	0	2	0	1	2.5	2.5	2.5	161.35	1578	1578	1	8
F8VQC1	F8VQC1	25	25	25	Signal recognition particle subunit SRP72	Srp72	tr|F8VQC1|F8VQC1_MOUSE Signal recognition particle subunit SRP72 OS=Mus musculus OX=10090 GN=Srp72 PE=1 SV=1	1	25	25	25	16	18	16	9	9	20	16	20	6	23	16	18	16	9	9	20	16	20	6	23	16	18	16	9	9	20	16	20	6	23	49.3	49.3	49.3	74.656	671	671	1	164
G3UYU0;Q69Z36;Q3UE17	G3UYU0;Q69Z36;Q3UE17	2;1;1	2;1;1	1;0;0	RNA-binding protein MEX3B;RNA-binding protein MEX3D	Mex3a;Mex3b;Mex3d	tr|G3UYU0|G3UYU0_MOUSE Mex3 RNA-binding family member A OS=Mus musculus OX=10090 GN=Mex3a PE=1 SV=1;sp|Q69Z36|MEX3B_MOUSE RNA-binding protein MEX3B OS=Mus musculus OX=10090 GN=Mex3b PE=2 SV=2;sp|Q3UE17|MEX3D_MOUSE RNA-binding protein MEX3D OS=Mus musculus	3	2	2	1	0	0	1	0	0	2	1	1	0	1	0	0	1	0	0	2	1	1	0	1	0	0	1	0	0	1	1	1	0	1	4.6	4.6	2.9	54.224	520	520;601;643	1	6
G3X8X0	G3X8X0	7	6	6		Dhx16	tr|G3X8X0|G3X8X0_MOUSE RNA helicase OS=Mus musculus OX=10090 GN=Dhx16 PE=1 SV=1	1	7	6	6	3	4	5	2	1	5	3	5	0	5	2	3	4	1	0	4	2	4	0	4	2	3	4	1	0	4	2	4	0	4	9.4	8.5	8.5	119.07	1044	1044	1	24
G3X972;Q91W86	G3X972	18;1	18;1	18;1		Sec24c	tr|G3X972|G3X972_MOUSE Sec24-related gene family, member C (S. cerevisiae) OS=Mus musculus OX=10090 GN=Sec24c PE=1 SV=1	2	18	18	18	10	12	12	7	8	11	12	15	4	14	10	12	12	7	8	11	12	15	4	14	10	12	12	7	8	11	12	15	4	14	21.5	21.5	21.5	118.58	1096	1096;941	1	108
G3X9B1	G3X9B1	2	2	2		Heatr1	tr|G3X9B1|G3X9B1_MOUSE HEAT repeat-containing protein 1 OS=Mus musculus OX=10090 GN=Heatr1 PE=1 SV=1	1	2	2	2	0	1	1	0	0	2	0	1	0	2	0	1	1	0	0	2	0	1	0	2	0	1	1	0	0	2	0	1	0	2	2	2	2	242.07	2143	2143	1	7
G3X9C2	G3X9C2	3	3	3	F-box only protein 50	Nccrp1	sp|G3X9C2|FBX50_MOUSE F-box only protein 50 OS=Mus musculus OX=10090 GN=Nccrp1 PE=1 SV=2	1	3	3	3	0	0	0	0	3	0	0	0	0	1	0	0	0	0	3	0	0	0	0	1	0	0	0	0	3	0	0	0	0	1	11.3	11.3	11.3	30.407	266	266	1	6
G3X9K3;A2A5R2	G3X9K3;A2A5R2	2;1	2;1	2;1	Brefeldin A-inhibited guanine nucleotide-exchange protein 1;Brefeldin A-inhibited guanine nucleotide-exchange protein 2	Arfgef1;Arfgef2	sp|G3X9K3|BIG1_MOUSE Brefeldin A-inhibited guanine nucleotide-exchange protein 1 OS=Mus musculus OX=10090 GN=Arfgef1 PE=1 SV=1;sp|A2A5R2|BIG2_MOUSE Brefeldin A-inhibited guanine nucleotide-exchange protein 2 OS=Mus musculus OX=10090 GN=Arfgef2 PE=1 SV=1	2	2	2	2	1	0	2	0	0	1	0	1	0	1	1	0	2	0	0	1	0	1	0	1	1	0	2	0	0	1	0	1	0	1	1.5	1.5	1.5	208.5	1846	1846;1792	1	6
G3X9Z4	G3X9Z4	23	23	23		Pcf11	tr|G3X9Z4|G3X9Z4_MOUSE PCF11 cleavage and polyadenylation factor subunit OS=Mus musculus OX=10090 GN=Pcf11 PE=1 SV=1	1	23	23	23	5	12	9	6	9	16	12	16	3	17	5	12	9	6	9	16	12	16	3	17	5	12	9	6	9	16	12	16	3	17	23.6	23.6	23.6	172.72	1553	1553	1	111
G5E870	G5E870	12	12	12	E3 ubiquitin-protein ligase TRIP12	Trip12	sp|G5E870|TRIPC_MOUSE E3 ubiquitin-protein ligase TRIP12 OS=Mus musculus OX=10090 GN=Trip12 PE=1 SV=1	1	12	12	12	5	7	3	3	3	6	4	5	1	8	5	7	3	3	3	6	4	5	1	8	5	7	3	3	3	6	4	5	1	8	8.4	8.4	8.4	224.13	2025	2025	1	45
G5E8K5	G5E8K5	33	33	32	Ankyrin-3	Ank3	sp|G5E8K5|ANK3_MOUSE Ankyrin-3 OS=Mus musculus OX=10090 GN=Ank3 PE=1 SV=1	1	33	33	32	16	26	22	17	22	25	25	27	8	27	16	26	22	17	22	25	25	27	8	27	16	25	21	17	22	24	24	26	8	26	24.8	24.8	24.3	214.06	1961	1961	1	233
G5E8V9	G5E8V9	5	5	5		Arfip1	tr|G5E8V9|G5E8V9_MOUSE ADP-ribosylation factor-interacting protein 1 OS=Mus musculus OX=10090 GN=Arfip1 PE=1 SV=1	1	5	5	5	0	3	1	1	1	5	4	3	0	3	0	3	1	1	1	5	4	3	0	3	0	3	1	1	1	5	4	3	0	3	13.7	13.7	13.7	41.518	373	373	1	22
G5E8Z3	G5E8Z3	2	2	2		2310050C09Rik	tr|G5E8Z3|G5E8Z3_MOUSE RIKEN cDNA 2310050C09 gene OS=Mus musculus OX=10090 GN=2310050C09Rik PE=1 SV=1	1	2	2	2	0	0	0	0	2	0	0	0	0	0	0	0	0	0	2	0	0	0	0	0	0	0	0	0	2	0	0	0	0	0	7.5	7.5	7.5	29.144	280	280	1	2
Q9DAV6;I7HJI5	Q9DAV6;I7HJI5	1;1	1;1	1;1		Serpinb9b;Serpinb9c	tr|Q9DAV6|Q9DAV6_MOUSE R86 OS=Mus musculus OX=10090 GN=Serpinb9b PE=1 SV=1;tr|I7HJI5|I7HJI5_MOUSE Serine (or cysteine) peptidase inhibitor, clade B, member 9c OS=Mus musculus OX=10090 GN=Serpinb9c PE=3 SV=1	2	1	1	1	1	0	1	0	0	0	1	1	0	1	1	0	1	0	0	0	1	1	0	1	1	0	1	0	0	0	1	1	0	1	2.7	2.7	2.7	42.733	377	377;387	1	5
O08528;Q3TRM8	O08528	13;1	11;1	10;1	Hexokinase-2	Hk2	sp|O08528|HXK2_MOUSE Hexokinase-2 OS=Mus musculus OX=10090 GN=Hk2 PE=1 SV=1	2	13	11	10	6	9	9	7	7	5	4	5	2	9	4	7	7	5	5	3	2	3	1	7	4	7	7	5	5	3	2	3	1	6	16.9	15.3	14.1	102.53	917	917;922	1	44
O08539;D3Z6Q9;Q7TQF7	O08539	13;1;1	13;1;1	13;1;1	Myc box-dependent-interacting protein 1	Bin1	sp|O08539|BIN1_MOUSE Myc box-dependent-interacting protein 1 OS=Mus musculus OX=10090 GN=Bin1 PE=1 SV=1	3	13	13	13	8	10	9	8	7	12	9	10	3	8	8	10	9	8	7	12	9	10	3	8	8	10	9	8	7	12	9	10	3	8	33.8	33.8	33.8	64.469	588	588;489;686	1	97
O08547	O08547	8	8	8	Vesicle-trafficking protein SEC22b	Sec22b	sp|O08547|SC22B_MOUSE Vesicle-trafficking protein SEC22b OS=Mus musculus OX=10090 GN=Sec22b PE=1 SV=3	1	8	8	8	5	7	7	7	6	6	5	4	0	5	5	7	7	7	6	6	5	4	0	5	5	7	7	7	6	6	5	4	0	5	47.4	47.4	47.4	24.74	215	215	1	62
O08553	O08553	8	6	5	Dihydropyrimidinase-related protein 2	Dpysl2	sp|O08553|DPYL2_MOUSE Dihydropyrimidinase-related protein 2 OS=Mus musculus OX=10090 GN=Dpysl2 PE=1 SV=2	1	8	6	5	5	7	8	7	5	6	8	8	6	7	4	5	6	5	4	4	6	6	4	5	3	5	5	4	3	3	5	5	4	4	19.4	15.2	12.9	62.277	572	572	1	51
O08579	O08579	3	3	3	Emerin	Emd	sp|O08579|EMD_MOUSE Emerin OS=Mus musculus OX=10090 GN=Emd PE=1 SV=1	1	3	3	3	2	3	3	3	3	2	1	0	0	1	2	3	3	3	3	2	1	0	0	1	2	3	3	3	3	2	1	0	0	1	18.9	18.9	18.9	29.435	259	259	1	19
O08580;Q61539	O08580	3;1	3;1	3;1	Steroid hormone receptor ERR1	Esrra	sp|O08580|ERR1_MOUSE Steroid hormone receptor ERR1 OS=Mus musculus OX=10090 GN=Esrra PE=1 SV=4	2	3	3	3	2	3	2	2	1	2	2	1	0	2	2	3	2	2	1	2	2	1	0	2	2	3	2	2	1	2	2	1	0	2	9	9	9	45.464	422	422;433	1	24
O08582	O08582	12	12	12	GTP-binding protein 1	Gtpbp1	sp|O08582|GTPB1_MOUSE GTP-binding protein 1 OS=Mus musculus OX=10090 GN=Gtpbp1 PE=1 SV=2	1	12	12	12	6	8	7	7	5	9	7	7	1	11	6	8	7	7	5	9	7	7	1	11	6	8	7	7	5	9	7	7	1	11	26.8	26.8	26.8	72.3	668	668	1	74
O08583	O08583	10	10	7	THO complex subunit 4	Alyref	sp|O08583|THOC4_MOUSE THO complex subunit 4 OS=Mus musculus OX=10090 GN=Alyref PE=1 SV=3	1	10	10	7	7	9	8	8	8	9	9	9	9	9	7	9	8	8	8	9	9	9	9	9	5	7	6	6	6	7	7	7	7	6	45.9	45.9	31.8	26.94	255	255	1	161
O08585	O08585	8	8	8	Clathrin light chain A	Clta	sp|O08585|CLCA_MOUSE Clathrin light chain A OS=Mus musculus OX=10090 GN=Clta PE=1 SV=2	1	8	8	8	5	6	7	6	6	7	6	8	5	7	5	6	7	6	6	7	6	8	5	7	5	6	7	6	6	7	6	8	5	7	24.3	24.3	24.3	25.604	235	235	1	86
O08599	O08599	15	15	15	Syntaxin-binding protein 1	Stxbp1	sp|O08599|STXB1_MOUSE Syntaxin-binding protein 1 OS=Mus musculus OX=10090 GN=Stxbp1 PE=1 SV=2	1	15	15	15	9	13	13	9	9	10	10	10	4	13	9	13	13	9	9	10	10	10	4	13	9	13	13	9	9	10	10	10	4	13	38.2	38.2	38.2	67.568	594	594	1	104
O08638	O08638	19	3	3	Myosin-11	Myh11	sp|O08638|MYH11_MOUSE Myosin-11 OS=Mus musculus OX=10090 GN=Myh11 PE=1 SV=1	1	19	3	3	12	13	15	16	15	16	15	9	14	10	1	1	2	1	1	1	2	0	2	2	1	1	2	1	1	1	2	0	2	2	8.8	1.4	1.4	227.03	1972	1972	1	13
O08663	O08663	4	4	4	Methionine aminopeptidase 2	Metap2	sp|O08663|MAP2_MOUSE Methionine aminopeptidase 2 OS=Mus musculus OX=10090 GN=Metap2 PE=1 SV=1	1	4	4	4	2	2	2	2	1	2	3	2	1	2	2	2	2	2	1	2	3	2	1	2	2	2	2	2	1	2	3	2	1	2	10	10	10	52.921	478	478	1	19
O08664;Q921K9	O08664	3;1	3;1	2;0	B-cell CLL/lymphoma 7 protein family member C	Bcl7c	sp|O08664|BCL7C_MOUSE B-cell CLL/lymphoma 7 protein family member C OS=Mus musculus OX=10090 GN=Bcl7c PE=1 SV=1	2	3	3	2	2	2	3	3	3	2	1	2	1	1	2	2	3	3	3	2	1	2	1	1	1	1	2	2	2	2	1	2	0	1	9.2	9.2	9.2	23.445	217	217;202	1	20
O08709;Q8BG37	O08709	4;1	4;1	4;1	Peroxiredoxin-6	Prdx6	sp|O08709|PRDX6_MOUSE Peroxiredoxin-6 OS=Mus musculus OX=10090 GN=Prdx6 PE=1 SV=3	2	4	4	4	1	0	1	0	0	2	3	2	1	4	1	0	1	0	0	2	3	2	1	4	1	0	1	0	0	2	3	2	1	4	21	21	21	24.87	224	224;224	1	14
O08740	O08740	2	2	2	DNA-directed RNA polymerase II subunit RPB11	Polr2j	sp|O08740|RPB11_MOUSE DNA-directed RNA polymerase II subunit RPB11 OS=Mus musculus OX=10090 GN=Polr2j PE=1 SV=1	1	2	2	2	1	2	1	1	1	2	2	2	1	2	1	2	1	1	1	2	2	2	1	2	1	2	1	1	1	2	2	2	1	2	21.4	21.4	21.4	13.251	117	117	1	15
O08749	O08749	12	12	12	Dihydrolipoyl dehydrogenase, mitochondrial	Dld	sp|O08749|DLDH_MOUSE Dihydrolipoyl dehydrogenase, mitochondrial OS=Mus musculus OX=10090 GN=Dld PE=1 SV=2	1	12	12	12	8	8	9	8	7	4	7	6	2	6	8	8	9	8	7	4	7	6	2	6	8	8	9	8	7	4	7	6	2	6	27.9	27.9	27.9	54.272	509	509	1	77
O08756	O08756	1	1	1	3-hydroxyacyl-CoA dehydrogenase type-2	Hsd17b10	sp|O08756|HCD2_MOUSE 3-hydroxyacyl-CoA dehydrogenase type-2 OS=Mus musculus OX=10090 GN=Hsd17b10 PE=1 SV=4	1	1	1	1	1	1	1	0	1	0	1	0	0	1	1	1	1	0	1	0	1	0	0	1	1	1	1	0	1	0	1	0	0	1	7.7	7.7	7.7	27.418	261	261	1	6
O08784	O08784	23	23	23	Treacle protein	Tcof1	sp|O08784|TCOF_MOUSE Treacle protein OS=Mus musculus OX=10090 GN=Tcof1 PE=1 SV=1	1	23	23	23	14	17	16	14	17	18	18	18	12	20	14	17	16	14	17	18	18	18	12	20	14	17	16	14	17	18	18	18	12	20	26.4	26.4	26.4	135	1320	1320	1	197
O08788	O08788	16	15	15	Dynactin subunit 1	Dctn1	sp|O08788|DCTN1_MOUSE Dynactin subunit 1 OS=Mus musculus OX=10090 GN=Dctn1 PE=1 SV=3	1	16	15	15	9	10	8	6	5	8	5	10	2	14	8	9	7	5	4	7	4	9	1	14	8	9	7	5	4	7	4	9	1	14	18.4	18	18	141.67	1281	1281	1	71
O08789	O08789	2	2	2	Max-binding protein MNT	Mnt	sp|O08789|MNT_MOUSE Max-binding protein MNT OS=Mus musculus OX=10090 GN=Mnt PE=2 SV=2	1	2	2	2	2	2	2	2	1	2	2	2	0	2	2	2	2	2	1	2	2	2	0	2	2	2	2	2	1	2	2	2	0	2	3.6	3.6	3.6	63.273	591	591	1	17
O08791;Q07802;Q8K4J2	O08791;Q07802	22;13;7	22;13;7	13;6;3	Transcription factor COE3;Transcription factor COE1	Ebf3;Ebf1	sp|O08791|COE3_MOUSE Transcription factor COE3 OS=Mus musculus OX=10090 GN=Ebf3 PE=1 SV=1;sp|Q07802|COE1_MOUSE Transcription factor COE1 OS=Mus musculus OX=10090 GN=Ebf1 PE=1 SV=1	3	22	22	13	16	21	20	16	19	22	20	21	14	19	16	21	20	16	19	22	20	21	14	19	9	12	11	9	12	13	12	13	8	11	41.9	41.9	27.9	64.877	596	596;591;599	1	248
O08792	O08792	10	1	1	Transcription factor COE2	Ebf2	sp|O08792|COE2_MOUSE Transcription factor COE2 OS=Mus musculus OX=10090 GN=Ebf2 PE=1 SV=4	1	10	1	1	8	10	9	8	7	9	9	8	6	9	1	1	0	1	0	0	1	0	0	1	1	1	0	1	0	0	1	0	0	1	16.7	2.1	2.1	62.605	575	575	1	5
O08795	O08795	8	8	8	Glucosidase 2 subunit beta	Prkcsh	sp|O08795|GLU2B_MOUSE Glucosidase 2 subunit beta OS=Mus musculus OX=10090 GN=Prkcsh PE=1 SV=1	1	8	8	8	6	7	8	7	8	5	6	5	3	7	6	7	8	7	8	5	6	5	3	7	6	7	8	7	8	5	6	5	3	7	22.5	22.5	22.5	58.792	521	521	1	62
O08807	O08807	9	7	7	Peroxiredoxin-4	Prdx4	sp|O08807|PRDX4_MOUSE Peroxiredoxin-4 OS=Mus musculus OX=10090 GN=Prdx4 PE=1 SV=1	1	9	7	7	8	8	8	7	8	8	7	9	7	9	7	6	6	6	6	7	6	7	5	7	7	6	6	6	6	7	6	7	5	7	32.8	29.2	29.2	31.052	274	274	1	80
O08808	O08808	1	1	1	Protein diaphanous homolog 1	Diaph1	sp|O08808|DIAP1_MOUSE Protein diaphanous homolog 1 OS=Mus musculus OX=10090 GN=Diaph1 PE=1 SV=1	1	1	1	1	0	0	0	0	0	0	0	0	0	1	0	0	0	0	0	0	0	0	0	1	0	0	0	0	0	0	0	0	0	1	1.3	1.3	1.3	139.34	1255	1255	1	1
O08810	O08810	50	50	49	116 kDa U5 small nuclear ribonucleoprotein component	Eftud2	sp|O08810|U5S1_MOUSE 116 kDa U5 small nuclear ribonucleoprotein component OS=Mus musculus OX=10090 GN=Eftud2 PE=1 SV=1	1	50	50	49	31	37	33	29	32	38	30	38	27	47	31	37	33	29	32	38	30	38	27	47	30	36	32	28	31	38	29	37	26	47	69.8	69.8	68.8	109.36	971	971	1	429
O08848	O08848	1	1	1	60 kDa SS-A/Ro ribonucleoprotein	Trove2	sp|O08848|RO60_MOUSE 60 kDa SS-A/Ro ribonucleoprotein OS=Mus musculus OX=10090 GN=RO60 PE=1 SV=1	1	1	1	1	0	1	1	1	1	1	1	1	0	1	0	1	1	1	1	1	1	1	0	1	0	1	1	1	1	1	1	1	0	1	2	2	2	60.123	538	538	1	8
O08856	O08856	2	2	2	RNA polymerase II elongation factor ELL	Ell	sp|O08856|ELL_MOUSE RNA polymerase II elongation factor ELL OS=Mus musculus OX=10090 GN=Ell PE=2 SV=2	1	2	2	2	0	1	1	0	0	2	2	2	0	2	0	1	1	0	0	2	2	2	0	2	0	1	1	0	0	2	2	2	0	2	6	6	6	67.146	602	602	1	10
O08901	O08901	1	1	1	Mitotic checkpoint serine/threonine-protein kinase BUB1	Bub1	sp|O08901|BUB1_MOUSE Mitotic checkpoint serine/threonine-protein kinase BUB1 OS=Mus musculus OX=10090 GN=Bub1 PE=1 SV=1	1	1	1	1	0	1	0	0	0	0	0	0	0	1	0	1	0	0	0	0	0	0	0	1	0	1	0	0	0	0	0	0	0	1	2.3	2.3	2.3	119.56	1058	1058	1	2
O08915	O08915	6	6	6	AH receptor-interacting protein	Aip	sp|O08915|AIP_MOUSE AH receptor-interacting protein OS=Mus musculus OX=10090 GN=Aip PE=1 SV=1	1	6	6	6	3	3	3	2	0	4	1	3	1	4	3	3	3	2	0	4	1	3	1	4	3	3	3	2	0	4	1	3	1	4	21.5	21.5	21.5	37.605	330	330	1	24
O08992	O08992	2	2	2	Syntenin-1	Sdcbp	sp|O08992|SDCB1_MOUSE Syntenin-1 OS=Mus musculus OX=10090 GN=Sdcbp PE=1 SV=1	1	2	2	2	1	0	1	0	0	1	1	1	0	1	1	0	1	0	0	1	1	1	0	1	1	0	1	0	0	1	1	1	0	1	6.7	6.7	6.7	32.379	299	299	1	6
O09000	O09000	2	2	2	Nuclear receptor coactivator 3	Ncoa3	sp|O09000|NCOA3_MOUSE Nuclear receptor coactivator 3 OS=Mus musculus OX=10090 GN=Ncoa3 PE=1 SV=2	1	2	2	2	0	0	0	0	0	1	0	1	0	1	0	0	0	0	0	1	0	1	0	1	0	0	0	0	0	1	0	1	0	1	2.4	2.4	2.4	151.57	1398	1398	1	3
O09005	O09005	2	2	2	Sphingolipid delta(4)-desaturase DES1	Degs1	sp|O09005|DEGS1_MOUSE Sphingolipid delta(4)-desaturase DES1 OS=Mus musculus OX=10090 GN=Degs1 PE=1 SV=1	1	2	2	2	0	2	2	1	1	0	0	0	0	0	0	2	2	1	1	0	0	0	0	0	0	2	2	1	1	0	0	0	0	0	10.5	10.5	10.5	38.241	323	323	1	6
O09061	O09061	2	2	2	Proteasome subunit beta type-1	Psmb1	sp|O09061|PSB1_MOUSE Proteasome subunit beta type-1 OS=Mus musculus OX=10090 GN=Psmb1 PE=1 SV=1	1	2	2	2	0	0	0	0	0	0	2	0	0	2	0	0	0	0	0	0	2	0	0	2	0	0	0	0	0	0	2	0	0	2	13.3	13.3	13.3	26.372	240	240	1	4
O09106	O09106	24	24	15	Histone deacetylase 1	Hdac1	sp|O09106|HDAC1_MOUSE Histone deacetylase 1 OS=Mus musculus OX=10090 GN=Hdac1 PE=1 SV=1	1	24	24	15	16	19	19	15	17	21	17	24	13	21	16	19	19	15	17	21	17	24	13	21	9	11	12	9	9	12	9	15	6	14	53.3	53.3	39.2	55.074	482	482	1	269
O09110	O09110	2	2	2	Dual specificity mitogen-activated protein kinase kinase 3	Map2k3	sp|O09110|MP2K3_MOUSE Dual specificity mitogen-activated protein kinase kinase 3 OS=Mus musculus OX=10090 GN=Map2k3 PE=1 SV=2	1	2	2	2	0	1	1	0	1	1	1	1	0	1	0	1	1	0	1	1	1	1	0	1	0	1	1	0	1	1	1	1	0	1	8.9	8.9	8.9	39.296	347	347	1	7
O09117	O09117	2	2	2	Synaptophysin-like protein 1	Sypl1	sp|O09117|SYPL1_MOUSE Synaptophysin-like protein 1 OS=Mus musculus OX=10090 GN=Sypl1 PE=1 SV=2	1	2	2	2	2	2	2	2	2	1	2	2	0	2	2	2	2	2	2	1	2	2	0	2	2	2	2	2	2	1	2	2	0	2	13	13	13	28.899	261	261	1	17
O09130	O09130	3	3	3	NFATC2-interacting protein	Nfatc2ip	sp|O09130|NF2IP_MOUSE NFATC2-interacting protein OS=Mus musculus OX=10090 GN=Nfatc2ip PE=1 SV=1	1	3	3	3	2	2	2	2	1	3	2	2	1	3	2	2	2	2	1	3	2	2	1	3	2	2	2	2	1	3	2	2	1	3	12.6	12.6	12.6	45.121	412	412	1	20
O09167	O09167	3	3	3	60S ribosomal protein L21	Rpl21	sp|O09167|RL21_MOUSE 60S ribosomal protein L21 OS=Mus musculus OX=10090 GN=Rpl21 PE=1 SV=3	1	3	3	3	2	2	2	2	2	2	2	3	2	2	2	2	2	2	2	2	2	3	2	2	2	2	2	2	2	2	2	3	2	2	16.2	16.2	16.2	18.562	160	160	1	22
O19441	O19441	2	2	1		H2-Q1	tr|O19441|O19441_MOUSE Histocompatibility 2, Q region locus 1 OS=Mus musculus OX=10090 GN=H2-Q1 PE=2 SV=1	1	2	2	1	1	1	0	0	1	0	0	0	0	1	1	1	0	0	1	0	0	0	0	1	0	1	0	0	1	0	0	0	0	1	6.5	6.5	3.8	41.322	368	368	1	4
O35114	O35114	4	4	4	Lysosome membrane protein 2	Scarb2	sp|O35114|SCRB2_MOUSE Lysosome membrane protein 2 OS=Mus musculus OX=10090 GN=Scarb2 PE=1 SV=3	1	4	4	4	0	1	2	4	3	2	1	2	0	2	0	1	2	4	3	2	1	2	0	2	0	1	2	4	3	2	1	2	0	2	12.3	12.3	12.3	54.043	478	478	1	19
O35127	O35127	5	5	5	Protein C10	Grcc10	sp|O35127|C10_MOUSE Protein C10 OS=Mus musculus OX=10090 GN=Grcc10 PE=1 SV=1	1	5	5	5	3	3	5	4	4	3	5	5	4	4	3	3	5	4	4	3	5	5	4	4	3	3	5	4	4	3	5	5	4	4	63.5	63.5	63.5	13.194	126	126	1	48
O35129	O35129	4	4	4	Prohibitin-2	Phb2	sp|O35129|PHB2_MOUSE Prohibitin-2 OS=Mus musculus OX=10090 GN=Phb2 PE=1 SV=1	1	4	4	4	4	4	3	3	3	0	1	0	1	0	4	4	3	3	3	0	1	0	1	0	4	4	3	3	3	0	1	0	1	0	19.1	19.1	19.1	33.296	299	299	1	19
O35130	O35130	14	14	14	Ribosomal RNA small subunit methyltransferase NEP1	Emg1	sp|O35130|NEP1_MOUSE Ribosomal RNA small subunit methyltransferase NEP1 OS=Mus musculus OX=10090 GN=Emg1 PE=1 SV=1	1	14	14	14	8	12	9	9	11	7	9	9	4	10	8	12	9	9	11	7	9	9	4	10	8	12	9	9	11	7	9	9	4	10	73.8	73.8	73.8	26.974	244	244	1	95
O35134	O35134	34	34	34	DNA-directed RNA polymerase I subunit RPA1	Polr1a	sp|O35134|RPA1_MOUSE DNA-directed RNA polymerase I subunit RPA1 OS=Mus musculus OX=10090 GN=Polr1a PE=1 SV=2	1	34	34	34	18	20	19	19	18	21	17	24	15	29	18	20	19	19	18	21	17	24	15	29	18	20	19	19	18	21	17	24	15	29	28.8	28.8	28.8	194.11	1717	1717	1	206
O35143	O35143	2	2	2	ATPase inhibitor, mitochondrial	Atpif1	sp|O35143|ATIF1_MOUSE ATPase inhibitor, mitochondrial OS=Mus musculus OX=10090 GN=Atp5if1 PE=1 SV=2	1	2	2	2	2	2	2	2	2	1	2	2	2	1	2	2	2	2	2	1	2	2	2	1	2	2	2	2	2	1	2	2	2	1	15.1	15.1	15.1	12.159	106	106	1	19
O35144	O35144	22	22	22	Telomeric repeat-binding factor 2	Terf2	sp|O35144|TERF2_MOUSE Telomeric repeat-binding factor 2 OS=Mus musculus OX=10090 GN=Terf2 PE=1 SV=3	1	22	22	22	15	18	16	16	12	20	18	20	9	21	15	18	16	16	12	20	18	20	9	21	15	18	16	16	12	20	18	20	9	21	43.4	43.4	43.4	60.263	541	541	1	196
O35207	O35207	2	2	2	Cyclin-dependent kinase 2-associated protein 1	Cdk2ap1	sp|O35207|CDKA1_MOUSE Cyclin-dependent kinase 2-associated protein 1 OS=Mus musculus OX=10090 GN=Cdk2ap1 PE=1 SV=2	1	2	2	2	1	1	1	1	0	1	1	2	1	2	1	1	1	1	0	1	1	2	1	2	1	1	1	1	0	1	1	2	1	2	34.2	34.2	34.2	12.354	114	114	1	11
O35218	O35218	21	21	21	Cleavage and polyadenylation specificity factor subunit 2	Cpsf2	sp|O35218|CPSF2_MOUSE Cleavage and polyadenylation specificity factor subunit 2 OS=Mus musculus OX=10090 GN=Cpsf2 PE=1 SV=1	1	21	21	21	8	13	14	8	11	14	13	14	7	18	8	13	14	8	11	14	13	14	7	18	8	13	14	8	11	14	13	14	7	18	34.8	34.8	34.8	88.382	782	782	1	134
O35226	O35226	8	8	8	26S proteasome non-ATPase regulatory subunit 4	Psmd4	sp|O35226|PSMD4_MOUSE 26S proteasome non-ATPase regulatory subunit 4 OS=Mus musculus OX=10090 GN=Psmd4 PE=1 SV=1	1	8	8	8	2	4	4	4	3	5	4	5	1	8	2	4	4	4	3	5	4	5	1	8	2	4	4	4	3	5	4	5	1	8	30.1	30.1	30.1	40.703	376	376	1	41
O35250	O35250	11	11	11	Exocyst complex component 7	Exoc7	sp|O35250|EXOC7_MOUSE Exocyst complex component 7 OS=Mus musculus OX=10090 GN=Exoc7 PE=1 SV=2	1	11	11	11	2	5	4	4	2	8	4	6	0	10	2	5	4	4	2	8	4	6	0	10	2	5	4	4	2	8	4	6	0	10	20.9	20.9	20.9	79.959	697	697	1	46
O35261	O35261	3	3	3	Transcription factor E2F3	E2f3	sp|O35261|E2F3_MOUSE Transcription factor E2F3 OS=Mus musculus OX=10090 GN=E2f3 PE=1 SV=2	1	3	3	3	1	2	1	1	0	2	3	3	0	1	1	2	1	1	0	2	3	3	0	1	1	2	1	1	0	2	3	3	0	1	8.8	8.8	8.8	48.757	457	457	1	14
O35280	O35280	5	5	5	Serine/threonine-protein kinase Chk1	Chek1	sp|O35280|CHK1_MOUSE Serine/threonine-protein kinase Chk1 OS=Mus musculus OX=10090 GN=Chek1 PE=1 SV=2	1	5	5	5	3	3	4	3	3	4	3	3	0	3	3	3	4	3	3	4	3	3	0	3	3	3	4	3	3	4	3	3	0	3	9.5	9.5	9.5	54.381	476	476	1	30
O35286	O35286	39	39	38	Pre-mRNA-splicing factor ATP-dependent RNA helicase DHX15	Dhx15	sp|O35286|DHX15_MOUSE Pre-mRNA-splicing factor ATP-dependent RNA helicase DHX15 OS=Mus musculus OX=10090 GN=Dhx15 PE=1 SV=2	1	39	39	38	30	35	34	31	30	33	35	34	27	34	30	35	34	31	30	33	35	34	27	34	29	34	33	30	29	32	34	33	27	33	57.5	57.5	56.4	91.006	795	795	1	470
O35295;Q8R4E6	O35295	11;2	11;2	9;1	Transcriptional activator protein Pur-beta	Purb	sp|O35295|PURB_MOUSE Transcriptional activator protein Pur-beta OS=Mus musculus OX=10090 GN=Purb PE=1 SV=3	2	11	11	9	3	6	6	5	5	8	8	10	4	10	3	6	6	5	5	8	8	10	4	10	3	5	6	5	5	7	7	9	4	8	46.9	46.9	42.9	33.901	324	324;350	1	66
O35317;P41778	O35317	7;3	7;3	5;2	Pre-B-cell leukemia transcription factor 3	Pbx3	sp|O35317|PBX3_MOUSE Pre-B-cell leukemia transcription factor 3 OS=Mus musculus OX=10090 GN=Pbx3 PE=2 SV=1	2	7	7	5	5	6	6	4	4	5	6	5	1	4	5	6	6	4	4	5	6	5	1	4	3	4	4	2	3	3	5	3	1	3	19.8	19.8	13.4	47.203	434	434;430	1	48
O35326	O35326	5	4	4	Serine/arginine-rich splicing factor 5	Srsf5	sp|O35326|SRSF5_MOUSE Serine/arginine-rich splicing factor 5 OS=Mus musculus OX=10090 GN=Srsf5 PE=1 SV=2	1	5	4	4	4	5	5	5	4	5	5	5	3	5	3	4	4	4	4	4	4	4	2	4	3	4	4	4	4	4	4	4	2	4	21.2	17.8	17.8	30.891	269	269	1	45
O35343	O35343	16	16	10	Importin subunit alpha-3	Kpna4	sp|O35343|IMA3_MOUSE Importin subunit alpha-3 OS=Mus musculus OX=10090 GN=Kpna4 PE=1 SV=1	1	16	16	10	13	14	14	14	12	13	14	13	7	15	13	14	14	14	12	13	14	13	7	15	8	9	9	9	8	9	9	10	6	10	46.4	46.4	34	57.922	521	521	1	193
O35344	O35344	15	9	9	Importin subunit alpha-4	Kpna3	sp|O35344|IMA4_MOUSE Importin subunit alpha-4 OS=Mus musculus OX=10090 GN=Kpna3 PE=1 SV=1	1	15	9	9	11	14	13	11	9	13	14	11	8	14	6	9	8	6	5	9	9	8	7	9	6	9	8	6	5	9	9	8	7	9	39.5	27.1	27.1	57.772	521	521	1	101
O35345	O35345	15	15	9	Importin subunit alpha-7	Kpna6	sp|O35345|IMA7_MOUSE Importin subunit alpha-7 OS=Mus musculus OX=10090 GN=Kpna6 PE=1 SV=2	1	15	15	9	11	9	11	9	8	12	8	11	6	12	11	9	11	9	8	12	8	11	6	12	6	4	6	4	3	7	3	6	4	8	33.2	33.2	22.2	59.964	536	536	1	117
O35347	O35347	2	2	2	Protein DGCR6	Dgcr6	sp|O35347|DGCR6_MOUSE Protein DGCR6 OS=Mus musculus OX=10090 GN=Dgcr6 PE=2 SV=2	1	2	2	2	1	1	1	0	1	2	1	1	0	1	1	1	1	0	1	2	1	1	0	1	1	1	1	0	1	2	1	1	0	1	10.6	10.6	10.6	22.837	198	198	1	9
O35382	O35382	5	5	5	Exocyst complex component 4	Exoc4	sp|O35382|EXOC4_MOUSE Exocyst complex component 4 OS=Mus musculus OX=10090 GN=Exoc4 PE=1 SV=2	1	5	5	5	4	4	1	2	2	5	2	2	0	2	4	4	1	2	2	5	2	2	0	2	4	4	1	2	2	5	2	2	0	2	7	7	7	110.54	975	975	1	24
O35459	O35459	3	3	3	Delta(3,5)-Delta(2,4)-dienoyl-CoA isomerase, mitochondrial	Ech1	sp|O35459|ECH1_MOUSE Delta(3,5)-Delta(2,4)-dienoyl-CoA isomerase, mitochondrial OS=Mus musculus OX=10090 GN=Ech1 PE=1 SV=1	1	3	3	3	3	2	2	2	1	0	0	0	1	1	3	2	2	2	1	0	0	0	1	1	3	2	2	2	1	0	0	0	1	1	9.5	9.5	9.5	36.118	327	327	1	12
O35593	O35593	6	6	6	26S proteasome non-ATPase regulatory subunit 14	Psmd14	sp|O35593|PSDE_MOUSE 26S proteasome non-ATPase regulatory subunit 14 OS=Mus musculus OX=10090 GN=Psmd14 PE=1 SV=2	1	6	6	6	3	4	3	2	3	5	2	5	0	6	3	4	3	2	3	5	2	5	0	6	3	4	3	2	3	5	2	5	0	6	37.4	37.4	37.4	34.577	310	310	1	34
O35609	O35609	5	5	5	Secretory carrier-associated membrane protein 3	Scamp3	sp|O35609|SCAM3_MOUSE Secretory carrier-associated membrane protein 3 OS=Mus musculus OX=10090 GN=Scamp3 PE=1 SV=3	1	5	5	5	5	4	4	5	3	5	1	1	1	3	5	4	4	5	3	5	1	1	1	3	5	4	4	5	3	5	1	1	1	3	19.8	19.8	19.8	38.458	349	349	1	32
O35613	O35613	8	8	8	Death domain-associated protein 6	Daxx	sp|O35613|DAXX_MOUSE Death domain-associated protein 6 OS=Mus musculus OX=10090 GN=Daxx PE=1 SV=1	1	8	8	8	6	8	8	5	5	6	5	7	1	7	6	8	8	5	5	6	5	7	1	7	6	8	8	5	5	6	5	7	1	7	16.9	16.9	16.9	81.488	739	739	1	58
O35638	O35638	19	19	16	Cohesin subunit SA-2	Stag2	sp|O35638|STAG2_MOUSE Cohesin subunit SA-2 OS=Mus musculus OX=10090 GN=Stag2 PE=1 SV=3	1	19	19	16	8	16	11	10	8	11	8	12	9	15	8	16	11	10	8	11	8	12	9	15	5	14	9	9	6	9	6	10	7	12	20.2	20.2	17.8	141.28	1231	1231	1	115
O35643	O35643	37	19	19	AP-1 complex subunit beta-1	Ap1b1	sp|O35643|AP1B1_MOUSE AP-1 complex subunit beta-1 OS=Mus musculus OX=10090 GN=Ap1b1 PE=1 SV=2	1	37	19	19	22	23	25	16	20	30	27	31	14	34	11	11	14	8	8	14	12	15	6	18	11	11	14	8	8	14	12	15	6	18	53.6	34.1	34.1	103.93	943	943	1	137
O35648	O35648	4	4	4	Centrin-3	Cetn3	sp|O35648|CETN3_MOUSE Centrin-3 OS=Mus musculus OX=10090 GN=Cetn3 PE=1 SV=1	1	4	4	4	2	1	1	2	2	1	1	1	1	2	2	1	1	2	2	1	1	1	1	2	2	1	1	2	2	1	1	1	1	2	30.5	30.5	30.5	19.519	167	167	1	14
O35654	O35654	7	7	7	DNA polymerase delta subunit 2	Pold2	sp|O35654|DPOD2_MOUSE DNA polymerase delta subunit 2 OS=Mus musculus OX=10090 GN=Pold2 PE=1 SV=2	1	7	7	7	3	3	2	0	1	3	3	4	0	7	3	3	2	0	1	3	3	4	0	7	3	3	2	0	1	3	3	4	0	7	24.3	24.3	24.3	51.354	469	469	1	26
O35658	O35658	6	6	6	Complement component 1 Q subcomponent-binding protein, mitochondrial	C1qbp	sp|O35658|C1QBP_MOUSE Complement component 1 Q subcomponent-binding protein, mitochondrial OS=Mus musculus OX=10090 GN=C1qbp PE=1 SV=1	1	6	6	6	4	4	5	5	5	4	5	5	4	5	4	4	5	5	5	4	5	5	4	5	4	4	5	5	5	4	5	5	4	5	25.2	25.2	25.2	31.013	278	278	1	54
O35685	O35685	15	15	15	Nuclear migration protein nudC	Nudc	sp|O35685|NUDC_MOUSE Nuclear migration protein nudC OS=Mus musculus OX=10090 GN=Nudc PE=1 SV=1	1	15	15	15	8	10	9	9	7	13	13	15	3	13	8	10	9	9	7	13	13	15	3	13	8	10	9	9	7	13	13	15	3	13	48.2	48.2	48.2	38.358	332	332	1	112
O35690;O88933;P63013;Q06348;Q8BYH0;O09113;Q8C8B0;P70390;O35602;O70137;O35137;O08934;O35085	O35690	6;1;1;1;1;1;1;1;1;1;1;1;1	2;0;0;0;0;0;0;0;0;0;0;0;0	2;0;0;0;0;0;0;0;0;0;0;0;0	Paired mesoderm homeobox protein 2B	Phox2b	sp|O35690|PHX2B_MOUSE Paired mesoderm homeobox protein 2B OS=Mus musculus OX=10090 GN=Phox2b PE=1 SV=1	13	6	2	2	5	5	5	5	3	5	5	5	2	3	2	2	2	1	1	1	2	1	1	1	2	2	2	1	1	1	2	1	1	1	19.1	7.6	7.6	31.621	314	314;382;245;247;263;325;326;331;342;343;399;530;564	1	14
O35691	O35691	16	16	16	Pinin	Pnn	sp|O35691|PININ_MOUSE Pinin OS=Mus musculus OX=10090 GN=Pnn PE=1 SV=4	1	16	16	16	10	13	9	9	9	13	10	12	5	12	10	13	9	9	9	13	10	12	5	12	10	13	9	9	9	13	10	12	5	12	28.7	28.7	28.7	82.435	725	725	1	104
O35730	O35730	9	6	6	E3 ubiquitin-protein ligase RING1	Ring1	sp|O35730|RING1_MOUSE E3 ubiquitin-protein ligase RING1 OS=Mus musculus OX=10090 GN=Ring1 PE=1 SV=2	1	9	6	6	7	6	6	5	7	8	7	8	3	9	4	3	4	3	4	5	4	5	1	6	4	3	4	3	4	5	4	5	1	6	30.5	22.9	22.9	42.63	406	406	1	56
O35737	O35737	23	23	12	Heterogeneous nuclear ribonucleoprotein H;Heterogeneous nuclear ribonucleoprotein H, N-terminally processed	Hnrnph1	sp|O35737|HNRH1_MOUSE Heterogeneous nuclear ribonucleoprotein H OS=Mus musculus OX=10090 GN=Hnrnph1 PE=1 SV=3	1	23	23	12	15	17	17	17	17	21	20	21	20	22	15	17	17	17	17	21	20	21	20	22	8	9	10	9	9	11	10	11	10	11	61.5	61.5	36.1	49.199	449	449	1	393
O35841;REV__P51450	O35841	27;1	27;1	27;1	Apoptosis inhibitor 5	Api5	sp|O35841|API5_MOUSE Apoptosis inhibitor 5 OS=Mus musculus OX=10090 GN=Api5 PE=1 SV=2	2	27	27	27	21	21	22	22	21	22	21	23	20	25	21	21	22	22	21	22	21	23	20	25	21	21	22	22	21	22	21	23	20	25	52.4	52.4	52.4	56.784	504	504;516	1	322
O35857	O35857	7	7	7	Mitochondrial import inner membrane translocase subunit TIM44	Timm44	sp|O35857|TIM44_MOUSE Mitochondrial import inner membrane translocase subunit TIM44 OS=Mus musculus OX=10090 GN=Timm44 PE=1 SV=2	1	7	7	7	6	5	7	6	6	6	5	6	3	6	6	5	7	6	6	6	5	6	3	6	6	5	7	6	6	6	5	6	3	6	19.2	19.2	19.2	51.091	452	452	1	60
O35864	O35864	16	16	16	COP9 signalosome complex subunit 5	Cops5	sp|O35864|CSN5_MOUSE COP9 signalosome complex subunit 5 OS=Mus musculus OX=10090 GN=Cops5 PE=1 SV=3	1	16	16	16	8	11	12	9	6	10	11	13	3	16	8	11	12	9	6	10	11	13	3	16	8	11	12	9	6	10	11	13	3	16	65.6	65.6	65.6	37.548	334	334	1	107
O35887	O35887	13	13	13	Calumenin	Calu	sp|O35887|CALU_MOUSE Calumenin OS=Mus musculus OX=10090 GN=Calu PE=1 SV=1	1	13	13	13	5	8	9	9	9	8	8	9	9	4	5	8	9	9	9	8	8	9	9	4	5	8	9	9	9	8	8	9	9	4	40	40	40	37.063	315	315	1	78
O35900	O35900	6	6	6	U6 snRNA-associated Sm-like protein LSm2	Lsm2	sp|O35900|LSM2_MOUSE U6 snRNA-associated Sm-like protein LSm2 OS=Mus musculus OX=10090 GN=Lsm2 PE=1 SV=1	1	6	6	6	5	5	5	5	5	5	6	5	5	5	5	5	5	5	5	5	6	5	5	5	5	5	5	5	5	5	6	5	5	5	69.5	69.5	69.5	10.834	95	95	1	83
O54692	O54692	1	1	1	Centromere/kinetochore protein zw10 homolog	Zw10	sp|O54692|ZW10_MOUSE Centromere/kinetochore protein zw10 homolog OS=Mus musculus OX=10090 GN=Zw10 PE=1 SV=3	1	1	1	1	0	1	0	1	0	1	0	0	0	1	0	1	0	1	0	1	0	0	0	1	0	1	0	1	0	1	0	0	0	1	2.1	2.1	2.1	88.062	779	779	1	4
O54734	O54734	12	12	12	Dolichyl-diphosphooligosaccharide--protein glycosyltransferase 48 kDa subunit	Ddost	sp|O54734|OST48_MOUSE Dolichyl-diphosphooligosaccharide--protein glycosyltransferase 48 kDa subunit OS=Mus musculus OX=10090 GN=Ddost PE=1 SV=2	1	12	12	12	11	10	10	7	9	3	2	2	4	7	11	10	10	7	9	3	2	2	4	7	11	10	10	7	9	3	2	2	4	7	32.9	32.9	32.9	49.027	441	441	1	72
O54774	O54774	7	7	7	AP-3 complex subunit delta-1	Ap3d1	sp|O54774|AP3D1_MOUSE AP-3 complex subunit delta-1 OS=Mus musculus OX=10090 GN=Ap3d1 PE=1 SV=1	1	7	7	7	2	5	2	1	1	5	4	3	0	6	2	5	2	1	1	5	4	3	0	6	2	5	2	1	1	5	4	3	0	6	8.3	8.3	8.3	135.08	1199	1199	1	30
O54781	O54781	9	6	6	SRSF protein kinase 2;SRSF protein kinase 2 N-terminal;SRSF protein kinase 2 C-terminal	Srpk2	sp|O54781|SRPK2_MOUSE SRSF protein kinase 2 OS=Mus musculus OX=10090 GN=Srpk2 PE=1 SV=2	1	9	6	6	3	8	7	4	6	7	6	7	1	7	2	5	4	2	4	4	3	4	1	5	2	5	4	2	4	4	3	4	1	5	16.2	11.9	11.9	76.756	681	681	1	34
O54784	O54784	1	1	1	Death-associated protein kinase 3	Dapk3	sp|O54784|DAPK3_MOUSE Death-associated protein kinase 3 OS=Mus musculus OX=10090 GN=Dapk3 PE=1 SV=1	1	1	1	1	0	0	0	0	1	1	1	0	0	0	0	0	0	0	1	1	1	0	0	0	0	0	0	0	1	1	1	0	0	0	2.9	2.9	2.9	51.421	448	448	1	3
O54785	O54785	2	2	2	LIM domain kinase 2	Limk2	sp|O54785|LIMK2_MOUSE LIM domain kinase 2 OS=Mus musculus OX=10090 GN=Limk2 PE=1 SV=2	1	2	2	2	0	0	0	0	0	0	0	0	0	2	0	0	0	0	0	0	0	0	0	2	0	0	0	0	0	0	0	0	0	2	5.2	5.2	5.2	72.201	638	638	1	2
O54825	O54825	14	14	14	Bystin	Bysl	sp|O54825|BYST_MOUSE Bystin OS=Mus musculus OX=10090 GN=Bysl PE=1 SV=3	1	14	14	14	7	12	8	6	5	9	7	9	3	14	7	12	8	6	5	9	7	9	3	14	7	12	8	6	5	9	7	9	3	14	40.6	40.6	40.6	49.783	436	436	1	82
O54833	O54833	12	11	11	Casein kinase II subunit alpha	Csnk2a2	sp|O54833|CSK22_MOUSE Casein kinase II subunit alpha OS=Mus musculus OX=10090 GN=Csnk2a2 PE=1 SV=1	1	12	11	11	8	11	8	7	7	11	10	11	5	9	7	10	7	6	6	10	9	10	5	8	7	10	7	6	6	10	9	10	5	8	45.1	43.4	43.4	41.215	350	350	1	92
O54908;Q9QYZ8	O54908	3;1	3;1	3;1	Dickkopf-related protein 1	Dkk1	sp|O54908|DKK1_MOUSE Dickkopf-related protein 1 OS=Mus musculus OX=10090 GN=Dkk1 PE=1 SV=2	2	3	3	3	2	1	1	1	1	1	1	1	0	2	2	1	1	1	1	1	1	1	0	2	2	1	1	1	1	1	1	1	0	2	11.4	11.4	11.4	29.297	272	272;259	1	11
O54916;Q80XA6	O54916	15;1	15;1	15;1	RalBP1-associated Eps domain-containing protein 1	Reps1	sp|O54916|REPS1_MOUSE RalBP1-associated Eps domain-containing protein 1 OS=Mus musculus OX=10090 GN=Reps1 PE=1 SV=2	2	15	15	15	7	10	10	7	6	13	12	14	5	12	7	10	10	7	6	13	12	14	5	12	7	10	10	7	6	13	12	14	5	12	27.7	27.7	27.7	86.518	795	795;521	1	105
O54941	O54941	19	18	18	SWI/SNF-related matrix-associated actin-dependent regulator of chromatin subfamily E member 1	Smarce1	sp|O54941|SMCE1_MOUSE SWI/SNF-related matrix-associated actin-dependent regulator of chromatin subfamily E member 1 OS=Mus musculus OX=10090 GN=Smarce1 PE=1 SV=1	1	19	18	18	11	14	14	11	13	16	15	18	9	16	11	14	13	11	13	15	14	17	9	15	11	14	13	11	13	15	14	17	9	15	47.4	45.7	45.7	46.638	411	411	1	168
O54950;Q91WG5	O54950	11;1	11;1	11;1	5-AMP-activated protein kinase subunit gamma-1	Prkag1	sp|O54950|AAKG1_MOUSE 5-AMP-activated protein kinase subunit gamma-1 OS=Mus musculus OX=10090 GN=Prkag1 PE=1 SV=2	2	11	11	11	8	7	8	7	7	9	9	8	2	8	8	7	8	7	7	9	9	8	2	8	8	7	8	7	7	9	9	8	2	8	45.8	45.8	45.8	37.52	330	330;566	1	75
O54962	O54962	3	3	3	Barrier-to-autointegration factor;Barrier-to-autointegration factor, N-terminally processed	Banf1	sp|O54962|BAF_MOUSE Barrier-to-autointegration factor OS=Mus musculus OX=10090 GN=Banf1 PE=1 SV=1	1	3	3	3	2	3	2	2	2	3	2	3	2	3	2	3	2	2	2	3	2	3	2	3	2	3	2	2	2	3	2	3	2	3	42.7	42.7	42.7	10.102	89	89	1	25
O54984	O54984	4	4	4	ATPase Asna1	Asna1	sp|O54984|GET3_MOUSE ATPase GET3 OS=Mus musculus OX=10090 GN=Get3 PE=1 SV=2	1	4	4	4	4	4	3	3	3	3	3	4	0	3	4	4	3	3	3	3	3	4	0	3	4	4	3	3	3	3	3	4	0	3	9.5	9.5	9.5	38.822	348	348	1	31
O55013	O55013	3	3	3	Trafficking protein particle complex subunit 3	Trappc3	sp|O55013|TPPC3_MOUSE Trafficking protein particle complex subunit 3 OS=Mus musculus OX=10090 GN=Trappc3 PE=1 SV=1	1	3	3	3	1	1	2	0	1	3	1	3	0	2	1	1	2	0	1	3	1	3	0	2	1	1	2	0	1	3	1	3	0	2	22.2	22.2	22.2	20.302	180	180	1	14
O55029	O55029	33	33	33	Coatomer subunit beta	Copb2	sp|O55029|COPB2_MOUSE Coatomer subunit beta OS=Mus musculus OX=10090 GN=Copb2 PE=1 SV=2	1	33	33	33	23	30	30	24	26	28	26	28	12	23	23	30	30	24	26	28	26	28	12	23	23	30	30	24	26	28	26	28	12	23	55.7	55.7	55.7	102.45	905	905	1	279
O55033	O55033	2	2	2	Cytoplasmic protein NCK2	Nck2	sp|O55033|NCK2_MOUSE Cytoplasmic protein NCK2 OS=Mus musculus OX=10090 GN=Nck2 PE=1 SV=1	1	2	2	2	0	1	0	1	0	1	1	2	1	2	0	1	0	1	0	1	1	2	1	2	0	1	0	1	0	1	1	2	1	2	6.3	6.3	6.3	42.879	380	380	1	9
O55047	O55047	9	9	7	Serine/threonine-protein kinase tousled-like 2	Tlk2	sp|O55047|TLK2_MOUSE Serine/threonine-protein kinase tousled-like 2 OS=Mus musculus OX=10090 GN=Tlk2 PE=1 SV=2	1	9	9	7	3	6	5	5	4	8	3	8	2	8	3	6	5	5	4	8	3	8	2	8	3	4	5	4	4	6	3	6	2	6	15.5	15.5	13.1	82.26	718	718	1	55
O55100	O55100	1	1	1	Synaptogyrin-1	Syngr1	sp|O55100|SNG1_MOUSE Synaptogyrin-1 OS=Mus musculus OX=10090 GN=Syngr1 PE=1 SV=2	1	1	1	1	1	1	1	1	1	1	1	1	0	1	1	1	1	1	1	1	1	1	0	1	1	1	1	1	1	1	1	1	0	1	5.1	5.1	5.1	25.652	234	234	1	9
O55106	O55106	11	10	10	Striatin	Strn	sp|O55106|STRN_MOUSE Striatin OS=Mus musculus OX=10090 GN=Strn PE=1 SV=2	1	11	10	10	4	7	7	3	2	5	6	6	1	9	4	7	7	3	2	5	6	6	1	8	4	7	7	3	2	5	6	6	1	8	25.3	24.4	24.4	85.965	780	780	1	49
O55128;REV__Q14BI5	O55128	9;1	9;1	9;1	Histone deacetylase complex subunit SAP18	Sap18	sp|O55128|SAP18_MOUSE Histone deacetylase complex subunit SAP18 OS=Mus musculus OX=10090 GN=Sap18 PE=1 SV=1	2	9	9	9	6	8	9	6	5	7	6	7	4	6	6	8	9	6	5	7	6	7	4	6	6	8	9	6	5	7	6	7	4	6	58.8	58.8	58.8	17.595	153	153;1463	1	80
O55131;Q9DA97	O55131	15;1	15;1	14;0	Septin-7	2007-09-01	sp|O55131|SEPT7_MOUSE Septin-7 OS=Mus musculus OX=10090 GN=Septin7 PE=1 SV=1	2	15	15	14	8	9	11	10	8	12	11	11	8	14	8	9	11	10	8	12	11	11	8	14	7	8	10	9	7	11	10	10	7	13	46.3	46.3	44.3	50.549	436	436;430	1	121
O55135	O55135	8	8	8	Eukaryotic translation initiation factor 6	Eif6	sp|O55135|IF6_MOUSE Eukaryotic translation initiation factor 6 OS=Mus musculus OX=10090 GN=Eif6 PE=1 SV=2	1	8	8	8	6	6	5	6	6	8	8	8	5	5	6	6	5	6	6	8	8	8	5	5	6	6	5	6	6	8	8	8	5	5	46.1	46.1	46.1	26.511	245	245	1	73
O55142	O55142	4	4	4	60S ribosomal protein L35a	Rpl35a	sp|O55142|RL35A_MOUSE 60S ribosomal protein L35a OS=Mus musculus OX=10090 GN=Rpl35a PE=1 SV=2	1	4	4	4	2	2	1	2	3	3	3	3	3	3	2	2	1	2	3	3	3	3	3	3	2	2	1	2	3	3	3	3	3	3	22.7	22.7	22.7	12.554	110	110	1	33
O55143;Q8R429;Q64518	O55143	29;9;5	29;9;5	29;9;5	Sarcoplasmic/endoplasmic reticulum calcium ATPase 2	Atp2a2	sp|O55143|AT2A2_MOUSE Sarcoplasmic/endoplasmic reticulum calcium ATPase 2 OS=Mus musculus OX=10090 GN=Atp2a2 PE=1 SV=2	3	29	29	29	22	28	23	21	18	17	13	8	13	10	22	28	23	21	18	17	13	8	13	10	22	28	23	21	18	17	13	8	13	10	32.7	32.7	32.7	114.86	1044	1044;994;999	1	176
O55201	O55201	20	20	20	Transcription elongation factor SPT5	Supt5h	sp|O55201|SPT5H_MOUSE Transcription elongation factor SPT5 OS=Mus musculus OX=10090 GN=Supt5h PE=1 SV=1	1	20	20	20	12	17	13	8	8	12	6	13	1	16	12	17	13	8	8	12	6	13	1	16	12	17	13	8	8	12	6	13	1	16	24	24	24	120.66	1082	1082	1	107
O55222	O55222	9	9	9	Integrin-linked protein kinase	Ilk	sp|O55222|ILK_MOUSE Integrin-linked protein kinase OS=Mus musculus OX=10090 GN=Ilk PE=1 SV=2	1	9	9	9	6	8	8	4	4	7	5	4	1	6	6	8	8	4	4	7	5	4	1	6	6	8	8	4	4	7	5	4	1	6	22.3	22.3	22.3	51.373	452	452	1	53
O55234	O55234	2	2	2	Proteasome subunit beta type-5	Psmb5	sp|O55234|PSB5_MOUSE Proteasome subunit beta type-5 OS=Mus musculus OX=10090 GN=Psmb5 PE=1 SV=3	1	2	2	2	1	0	0	1	1	0	0	0	0	1	1	0	0	1	1	0	0	0	0	1	1	0	0	1	1	0	0	0	0	1	10.6	10.6	10.6	28.532	264	264	1	4
O55236	O55236	11	11	11	mRNA-capping enzyme;Polynucleotide 5-triphosphatase;mRNA guanylyltransferase	Rngtt	sp|O55236|MCE1_MOUSE mRNA-capping enzyme OS=Mus musculus OX=10090 GN=Rngtt PE=1 SV=1	1	11	11	11	3	2	4	3	3	5	3	7	0	9	3	2	4	3	3	5	3	7	0	9	3	2	4	3	3	5	3	7	0	9	22.1	22.1	22.1	68.683	597	597	1	41
O55242	O55242	1	1	1	Sigma non-opioid intracellular receptor 1	Sigmar1	sp|O55242|SGMR1_MOUSE Sigma non-opioid intracellular receptor 1 OS=Mus musculus OX=10090 GN=Sigmar1 PE=1 SV=1	1	1	1	1	0	1	1	0	1	0	0	0	0	0	0	1	1	0	1	0	0	0	0	0	0	1	1	0	1	0	0	0	0	0	5.8	5.8	5.8	25.25	223	223	1	3
O70133	O70133	50	50	50	ATP-dependent RNA helicase A	Dhx9	sp|O70133|DHX9_MOUSE ATP-dependent RNA helicase A OS=Mus musculus OX=10090 GN=Dhx9 PE=1 SV=2	1	50	50	50	38	36	41	36	38	42	37	42	26	48	38	36	41	36	38	42	37	42	26	48	38	36	41	36	38	42	37	42	26	48	41.7	41.7	41.7	149.47	1380	1380	1	471
O70152	O70152	3	3	3	Dolichol-phosphate mannosyltransferase subunit 1	Dpm1	sp|O70152|DPM1_MOUSE Dolichol-phosphate mannosyltransferase subunit 1 OS=Mus musculus OX=10090 GN=Dpm1 PE=1 SV=1	1	3	3	3	2	2	3	2	2	0	0	0	0	1	2	2	3	2	2	0	0	0	0	1	2	2	3	2	2	0	0	0	0	1	11.9	11.9	11.9	29.174	260	260	1	12
O70194	O70194	22	22	22	Eukaryotic translation initiation factor 3 subunit D	Eif3d	sp|O70194|EIF3D_MOUSE Eukaryotic translation initiation factor 3 subunit D OS=Mus musculus OX=10090 GN=Eif3d PE=1 SV=2	1	22	22	22	12	16	17	16	14	17	16	18	11	20	12	16	17	16	14	17	16	18	11	20	12	16	17	16	14	17	16	18	11	20	50.9	50.9	50.9	63.988	548	548	1	212
O70230;Q8BMU0	O70230	7;2	7;2	7;2	Zinc finger protein 143	Znf143	sp|O70230|ZN143_MOUSE Zinc finger protein 143 OS=Mus musculus OX=10090 GN=Znf143 PE=1 SV=2	2	7	7	7	4	6	5	5	4	6	6	5	2	6	4	6	5	5	4	6	6	5	2	6	4	6	5	5	4	6	6	5	2	6	16.8	16.8	16.8	69.04	638	638;568	1	60
O70251	O70251	13	12	12	Elongation factor 1-beta	Eef1b	sp|O70251|EF1B_MOUSE Elongation factor 1-beta OS=Mus musculus OX=10090 GN=Eef1b PE=1 SV=5	1	13	12	12	7	9	8	8	9	10	11	11	11	13	6	8	7	7	8	9	10	10	10	12	6	8	7	7	8	9	10	10	10	12	75.6	70.7	70.7	24.693	225	225	1	116
O70252	O70252	3	3	3	Heme oxygenase 2	Hmox2	sp|O70252|HMOX2_MOUSE Heme oxygenase 2 OS=Mus musculus OX=10090 GN=Hmox2 PE=1 SV=1	1	3	3	3	2	3	2	2	3	3	2	1	1	3	2	3	2	2	3	3	2	1	1	3	2	3	2	2	3	3	2	1	1	3	15.6	15.6	15.6	35.738	315	315	1	28
O70274;Q63739	O70274;Q63739	4;2	4;2	4;2	Protein tyrosine phosphatase type IVA 2;Protein tyrosine phosphatase type IVA 1	Ptp4a2;Ptp4a1	sp|O70274|TP4A2_MOUSE Protein tyrosine phosphatase type IVA 2 OS=Mus musculus OX=10090 GN=Ptp4a2 PE=1 SV=1;sp|Q63739|TP4A1_MOUSE Protein tyrosine phosphatase type IVA 1 OS=Mus musculus OX=10090 GN=Ptp4a1 PE=1 SV=1	2	4	4	4	2	4	3	2	3	3	2	3	2	3	2	4	3	2	3	3	2	3	2	3	2	4	3	2	3	3	2	3	2	3	27.5	27.5	27.5	19.127	167	167;173	1	31
O70305	O70305	11	11	11	Ataxin-2	Atxn2	sp|O70305|ATX2_MOUSE Ataxin-2 OS=Mus musculus OX=10090 GN=Atxn2 PE=1 SV=1	1	11	11	11	7	6	8	4	2	7	8	9	3	11	7	6	8	4	2	7	8	9	3	11	7	6	8	4	2	7	8	9	3	11	13.2	13.2	13.2	136.48	1285	1285	1	65
O70310	O70310	11	11	9	Glycylpeptide N-tetradecanoyltransferase 1	Nmt1	sp|O70310|NMT1_MOUSE Glycylpeptide N-tetradecanoyltransferase 1 OS=Mus musculus OX=10090 GN=Nmt1 PE=1 SV=1	1	11	11	9	4	6	7	5	6	8	8	7	6	9	4	6	7	5	6	8	8	7	6	9	4	4	5	4	4	6	6	5	5	7	31.2	31.2	26.2	56.888	496	496	1	70
O70311	O70311	8	6	6	Glycylpeptide N-tetradecanoyltransferase 2	Nmt2	sp|O70311|NMT2_MOUSE Glycylpeptide N-tetradecanoyltransferase 2 OS=Mus musculus OX=10090 GN=Nmt2 PE=1 SV=1	1	8	6	6	2	3	4	3	2	4	6	6	1	6	2	1	2	2	0	2	4	4	0	4	2	1	2	2	0	2	4	4	0	4	19.8	15.1	15.1	60.484	529	529	1	21
O70318	O70318	18	18	16	Band 4.1-like protein 2	Epb41l2	sp|O70318|E41L2_MOUSE Band 4.1-like protein 2 OS=Mus musculus OX=10090 GN=Epb41l2 PE=1 SV=2	1	18	18	16	11	13	13	9	11	10	16	11	4	10	11	13	13	9	11	10	16	11	4	10	9	12	12	8	9	8	14	10	4	9	21.7	21.7	19.8	109.94	988	988	1	115
O70374	O70374	5	5	3	Protein CBFA2T2	Cbfa2t2	sp|O70374|MTG8R_MOUSE Protein CBFA2T2 OS=Mus musculus OX=10090 GN=Cbfa2t2 PE=1 SV=3	1	5	5	3	4	4	5	3	4	4	2	4	0	2	4	4	5	3	4	4	2	4	0	2	2	2	3	1	2	2	1	2	0	2	9.9	9.9	5.6	65.904	594	594	1	32
O70378	O70378	3	3	3	ER membrane protein complex subunit 8	Emc8	sp|O70378|EMC8_MOUSE ER membrane protein complex subunit 8 OS=Mus musculus OX=10090 GN=Emc8 PE=1 SV=1	1	3	3	3	1	3	2	1	1	1	1	1	0	2	1	3	2	1	1	1	1	1	0	2	1	3	2	1	1	1	1	1	0	2	17.4	17.4	17.4	23.348	207	207	1	13
O70435	O70435	3	3	3	Proteasome subunit alpha type-3	Psma3	sp|O70435|PSA3_MOUSE Proteasome subunit alpha type-3 OS=Mus musculus OX=10090 GN=Psma3 PE=1 SV=3	1	3	3	3	1	0	0	0	2	1	2	2	2	3	1	0	0	0	2	1	2	2	2	3	1	0	0	0	2	1	2	2	2	3	13.7	13.7	13.7	28.405	255	255	1	14
O70477;Q8BG99	O70477	5;1	5;1	5;1	Homeobox protein PKNOX1	Pknox1	sp|O70477|PKNX1_MOUSE Homeobox protein PKNOX1 OS=Mus musculus OX=10090 GN=Pknox1 PE=1 SV=3	2	5	5	5	3	3	3	3	3	4	4	4	0	5	3	3	3	3	3	4	4	4	0	5	3	3	3	3	3	4	4	4	0	5	16.3	16.3	16.3	47.538	436	436;474	1	34
O70492	O70492	13	13	11	Sorting nexin-3	Snx3	sp|O70492|SNX3_MOUSE Sorting nexin-3 OS=Mus musculus OX=10090 GN=Snx3 PE=1 SV=3	1	13	13	11	9	9	10	9	10	12	12	12	10	11	9	9	10	9	10	12	12	12	10	11	8	7	8	7	8	10	10	10	8	10	66.7	66.7	62.3	18.757	162	162	1	118
O70493	O70493	11	9	9	Sorting nexin-12	Snx12	sp|O70493|SNX12_MOUSE Sorting nexin-12 OS=Mus musculus OX=10090 GN=Snx12 PE=1 SV=1	1	11	9	9	6	10	11	11	10	10	10	10	6	9	5	8	9	9	8	8	8	8	4	8	5	8	9	9	8	8	8	8	4	8	59.4	55.2	55.2	19.116	165	165	1	84
O70494	O70494	4	4	4	Transcription factor Sp3	Sp3	sp|O70494|SP3_MOUSE Transcription factor Sp3 OS=Mus musculus OX=10090 GN=Sp3 PE=1 SV=2	1	4	4	4	0	2	2	3	4	3	4	4	2	4	0	2	2	3	4	3	4	4	2	4	0	2	2	3	4	3	4	4	2	4	8.2	8.2	8.2	82.361	783	783	1	30
O70503	O70503	9	9	9	Very-long-chain 3-oxoacyl-CoA reductase	Hsd17b12	sp|O70503|DHB12_MOUSE Very-long-chain 3-oxoacyl-CoA reductase OS=Mus musculus OX=10090 GN=Hsd17b12 PE=1 SV=1	1	9	9	9	4	8	7	8	6	4	2	2	1	7	4	8	7	8	6	4	2	2	1	7	4	8	7	8	6	4	2	2	1	7	36.9	36.9	36.9	34.741	312	312	1	52
O70546;P79457	O70546	9;2	9;2	9;2	Lysine-specific demethylase 6A	Kdm6a	sp|O70546|KDM6A_MOUSE Lysine-specific demethylase 6A OS=Mus musculus OX=10090 GN=Kdm6a PE=1 SV=2	2	9	9	9	1	3	2	0	0	5	4	5	0	8	1	3	2	0	0	5	4	5	0	8	1	3	2	0	0	5	4	5	0	8	10.2	10.2	10.2	154.35	1401	1401;1212	1	28
O70551;Q9Z0G2	O70551	16;3	16;3	13;0	SRSF protein kinase 1	Srpk1	sp|O70551|SRPK1_MOUSE SRSF protein kinase 1 OS=Mus musculus OX=10090 GN=Srpk1 PE=1 SV=2	2	16	16	13	8	14	13	8	8	15	14	15	8	14	8	14	13	8	8	15	14	15	8	14	7	11	10	6	6	12	11	12	8	12	33.8	33.8	29.3	73.088	648	648;565	1	139
O70562;O70558;O70555;O70554;O70559	O70562;O70558;O70555;O70554;O70559	1;1;1;1;1	1;1;1;1;1	1;1;1;1;1	Small proline-rich protein 2K;Small proline-rich protein 2G;Small proline-rich protein 2D;Small proline-rich protein 2B;Small proline-rich protein 2H	Sprr2k;Sprr2g;Sprr2d;Sprr2b;Sprr2h	sp|O70562|SPR2K_MOUSE Small proline-rich protein 2K OS=Mus musculus OX=10090 GN=Sprr2k PE=2 SV=1;sp|O70558|SPR2G_MOUSE Small proline-rich protein 2G OS=Mus musculus OX=10090 GN=Sprr2g PE=2 SV=1;sp|O70555|SPR2D_MOUSE Small proline-rich protein 2D OS=Mus mus	5	1	1	1	0	0	0	0	1	0	0	0	0	0	0	0	0	0	1	0	0	0	0	0	0	0	0	0	1	0	0	0	0	0	13.2	13.2	13.2	7.4989	68	68;76;85;98;108	1	1
O70591	O70591	3	3	3	Prefoldin subunit 2	Pfdn2	sp|O70591|PFD2_MOUSE Prefoldin subunit 2 OS=Mus musculus OX=10090 GN=Pfdn2 PE=1 SV=2	1	3	3	3	2	3	3	2	2	3	3	3	1	3	2	3	3	2	2	3	3	3	1	3	2	3	3	2	2	3	3	3	1	3	23.4	23.4	23.4	16.534	154	154	1	33
O88271	O88271	2	2	2	Craniofacial development protein 1	Cfdp1	sp|O88271|CFDP1_MOUSE Craniofacial development protein 1 OS=Mus musculus OX=10090 GN=Cfdp1 PE=1 SV=1	1	2	2	2	1	2	2	2	2	1	2	1	2	2	1	2	2	2	2	1	2	1	2	2	1	2	2	2	2	1	2	1	2	2	8.8	8.8	8.8	32.921	295	295	1	17
O88286	O88286	8	8	8	Protein Wiz	Wiz	sp|O88286|WIZ_MOUSE Protein Wiz OS=Mus musculus OX=10090 GN=Wiz PE=1 SV=2	1	8	8	8	7	5	6	6	6	8	6	6	4	8	7	5	6	6	6	8	6	6	4	8	7	5	6	6	6	8	6	6	4	8	6.1	6.1	6.1	184.29	1684	1684	1	63
O88291	O88291	6	6	6	DBIRD complex subunit ZNF326	Znf326	sp|O88291|ZN326_MOUSE DBIRD complex subunit ZNF326 OS=Mus musculus OX=10090 GN=Znf326 PE=1 SV=1	1	6	6	6	3	2	2	2	2	5	3	3	0	5	3	2	2	2	2	5	3	3	0	5	3	2	2	2	2	5	3	3	0	5	14.7	14.7	14.7	65.225	580	580	1	27
O88379	O88379	18	18	18	Bromodomain adjacent to zinc finger domain protein 1A	Baz1a	sp|O88379|BAZ1A_MOUSE Bromodomain adjacent to zinc finger domain protein 1A OS=Mus musculus OX=10090 GN=Baz1a PE=1 SV=3	1	18	18	18	8	12	6	7	10	12	10	8	1	11	8	12	6	7	10	12	10	8	1	11	8	12	6	7	10	12	10	8	1	11	16.9	16.9	16.9	178.46	1555	1555	1	94
O88448;O88447;Q9DBS5	O88448	3;1;1	3;1;1	3;1;1	Kinesin light chain 2	Klc2	sp|O88448|KLC2_MOUSE Kinesin light chain 2 OS=Mus musculus OX=10090 GN=Klc2 PE=1 SV=1	3	3	3	3	1	1	1	0	1	1	0	1	0	3	1	1	1	0	1	1	0	1	0	3	1	1	1	0	1	1	0	1	0	3	7.2	7.2	7.2	66.662	599	599;541;619	1	9
O88455	O88455	4	4	4	7-dehydrocholesterol reductase	Dhcr7	sp|O88455|DHCR7_MOUSE 7-dehydrocholesterol reductase OS=Mus musculus OX=10090 GN=Dhcr7 PE=1 SV=1	1	4	4	4	4	4	4	3	2	1	1	0	0	1	4	4	4	3	2	1	1	0	0	1	4	4	4	3	2	1	1	0	0	1	9.3	9.3	9.3	53.918	471	471	1	21
O88485	O88485	1	1	1	Cytoplasmic dynein 1 intermediate chain 1	Dync1i1	sp|O88485|DC1I1_MOUSE Cytoplasmic dynein 1 intermediate chain 1 OS=Mus musculus OX=10090 GN=Dync1i1 PE=1 SV=2	1	1	1	1	0	0	1	0	0	1	0	0	0	1	0	0	1	0	0	1	0	0	0	1	0	0	1	0	0	1	0	0	0	1	5.4	5.4	5.4	70.724	628	628	1	3
O88487	O88487	18	18	18	Cytoplasmic dynein 1 intermediate chain 2	Dync1i2	sp|O88487|DC1I2_MOUSE Cytoplasmic dynein 1 intermediate chain 2 OS=Mus musculus OX=10090 GN=Dync1i2 PE=1 SV=1	1	18	18	18	9	11	13	10	8	15	10	14	5	16	9	11	13	10	8	15	10	14	5	16	9	11	13	10	8	15	10	14	5	16	53.9	53.9	53.9	68.393	612	612	1	125
O88520	O88520	2	2	2	Leucine-rich repeat protein SHOC-2	Shoc2	sp|O88520|SHOC2_MOUSE Leucine-rich repeat protein SHOC-2 OS=Mus musculus OX=10090 GN=Shoc2 PE=1 SV=2	1	2	2	2	2	1	0	0	0	2	2	0	0	2	2	1	0	0	0	2	2	0	0	2	2	1	0	0	0	2	2	0	0	2	6.9	6.9	6.9	64.892	582	582	1	9
O88532	O88532	39	39	39	Zinc finger RNA-binding protein	Zfr	sp|O88532|ZFR_MOUSE Zinc finger RNA-binding protein OS=Mus musculus OX=10090 GN=Zfr PE=1 SV=2	1	39	39	39	22	27	27	23	23	37	34	35	15	37	22	27	27	23	23	37	34	35	15	37	22	27	27	23	23	37	34	35	15	37	46.4	46.4	46.4	116.86	1074	1074	1	368
O88543	O88543	11	11	11	COP9 signalosome complex subunit 3	Cops3	sp|O88543|CSN3_MOUSE COP9 signalosome complex subunit 3 OS=Mus musculus OX=10090 GN=Cops3 PE=1 SV=3	1	11	11	11	6	5	6	6	5	8	6	10	2	9	6	5	6	6	5	8	6	10	2	9	6	5	6	6	5	8	6	10	2	9	35.7	35.7	35.7	47.832	423	423	1	70
O88544	O88544	22	22	22	COP9 signalosome complex subunit 4	Cops4	sp|O88544|CSN4_MOUSE COP9 signalosome complex subunit 4 OS=Mus musculus OX=10090 GN=Cops4 PE=1 SV=1	1	22	22	22	12	17	12	15	11	17	14	17	8	21	12	17	12	15	11	17	14	17	8	21	12	17	12	15	11	17	14	17	8	21	70.4	70.4	70.4	46.284	406	406	1	181
O88545	O88545	10	10	10	COP9 signalosome complex subunit 6	Cops6	sp|O88545|CSN6_MOUSE COP9 signalosome complex subunit 6 OS=Mus musculus OX=10090 GN=Cops6 PE=1 SV=1	1	10	10	10	6	10	8	7	7	10	9	10	4	8	6	10	8	7	7	10	9	10	4	8	6	10	8	7	7	10	9	10	4	8	46.3	46.3	46.3	35.88	324	324	1	93
O88559	O88559	5	5	5	Menin	Men1	sp|O88559|MEN1_MOUSE Menin OS=Mus musculus OX=10090 GN=Men1 PE=1 SV=2	1	5	5	5	0	3	0	0	0	3	2	3	1	4	0	3	0	0	0	3	2	3	1	4	0	3	0	0	0	3	2	3	1	4	13.1	13.1	13.1	67.5	611	611	1	16
O88569	O88569	32	32	32	Heterogeneous nuclear ribonucleoproteins A2/B1	Hnrnpa2b1	sp|O88569|ROA2_MOUSE Heterogeneous nuclear ribonucleoproteins A2/B1 OS=Mus musculus OX=10090 GN=Hnrnpa2b1 PE=1 SV=2	1	32	32	32	22	25	26	27	26	29	31	30	28	29	22	25	26	27	26	29	31	30	28	29	22	25	26	27	26	29	31	30	28	29	76.2	76.2	76.2	37.402	353	353	1	984
O88574	O88574	5	5	5	Histone deacetylase complex subunit SAP30	Sap30	sp|O88574|SAP30_MOUSE Histone deacetylase complex subunit SAP30 OS=Mus musculus OX=10090 GN=Sap30 PE=1 SV=1	1	5	5	5	5	3	4	4	4	4	4	4	3	4	5	3	4	4	4	4	4	4	3	4	5	3	4	4	4	4	4	4	3	4	21.8	21.8	21.8	23.231	220	220	1	49
O88587	O88587	3	3	3	Catechol O-methyltransferase	Comt	sp|O88587|COMT_MOUSE Catechol O-methyltransferase OS=Mus musculus OX=10090 GN=Comt PE=1 SV=2	1	3	3	3	3	3	3	0	1	1	1	2	0	1	3	3	3	0	1	1	1	2	0	1	3	3	3	0	1	1	1	2	0	1	16.6	16.6	16.6	29.486	265	265	1	15
O88597	O88597	1	1	1	Beclin-1	Becn1	sp|O88597|BECN1_MOUSE Beclin-1 OS=Mus musculus OX=10090 GN=Becn1 PE=1 SV=3	1	1	1	1	1	1	1	0	0	0	0	1	0	1	1	1	1	0	0	0	0	1	0	1	1	1	1	0	0	0	0	1	0	1	3.1	3.1	3.1	51.588	448	448	1	5
O88653	O88653	2	2	2	Ragulator complex protein LAMTOR3	Lamtor3	sp|O88653|LTOR3_MOUSE Ragulator complex protein LAMTOR3 OS=Mus musculus OX=10090 GN=Lamtor3 PE=1 SV=1	1	2	2	2	1	2	2	1	1	1	1	2	0	2	1	2	2	1	1	1	1	2	0	2	1	2	2	1	1	1	1	2	0	2	27.4	27.4	27.4	13.553	124	124	1	13
O88665	O88665	12	12	12	Bromodomain-containing protein 7	Brd7	sp|O88665|BRD7_MOUSE Bromodomain-containing protein 7 OS=Mus musculus OX=10090 GN=Brd7 PE=1 SV=1	1	12	12	12	4	8	7	2	5	9	8	8	0	10	4	8	7	2	5	9	8	8	0	10	4	8	7	2	5	9	8	8	0	10	30	30	30	73.999	651	651	1	61
O88685	O88685	6	6	6	26S protease regulatory subunit 6A	Psmc3	sp|O88685|PRS6A_MOUSE 26S proteasome regulatory subunit 6A OS=Mus musculus OX=10090 GN=Psmc3 PE=1 SV=2	1	6	6	6	2	3	1	0	1	2	2	4	0	5	2	3	1	0	1	2	2	4	0	5	2	3	1	0	1	2	2	4	0	5	14.7	14.7	14.7	49.548	442	442	1	20
O88700	O88700	1	1	1	Bloom syndrome protein homolog	Blm	sp|O88700|BLM_MOUSE Bloom syndrome protein homolog OS=Mus musculus OX=10090 GN=Blm PE=1 SV=1	1	1	1	1	1	0	1	0	0	1	0	0	1	1	1	0	1	0	0	1	0	0	1	1	1	0	1	0	0	1	0	0	1	1	1	1	1	158.36	1416	1416	1	5
O88708;CON__Q2YDI2	O88708	8;2	8;2	8;2	Origin recognition complex subunit 4	Orc4	sp|O88708|ORC4_MOUSE Origin recognition complex subunit 4 OS=Mus musculus OX=10090 GN=Orc4 PE=1 SV=2	2	8	8	8	2	2	2	3	2	4	3	4	0	7	2	2	2	3	2	4	3	4	0	7	2	2	2	3	2	4	3	4	0	7	24.5	24.5	24.5	49.981	433	433;436	1	31
O88712;REV__Q9D8M3	O88712	19;1	19;1	14;1	C-terminal-binding protein 1	Ctbp1	sp|O88712|CTBP1_MOUSE C-terminal-binding protein 1 OS=Mus musculus OX=10090 GN=Ctbp1 PE=1 SV=2	2	19	19	14	11	13	13	13	13	18	15	19	9	15	11	13	13	13	13	18	15	19	9	15	7	10	10	9	10	14	11	14	6	14	52.6	52.6	44.9	47.744	441	441;146	1	158
O88746	O88746	11	11	11	Target of Myb protein 1	Tom1	sp|O88746|TOM1_MOUSE Target of Myb protein 1 OS=Mus musculus OX=10090 GN=Tom1 PE=1 SV=1	1	11	11	11	5	9	9	6	3	6	8	6	4	6	5	9	9	6	3	6	8	6	4	6	5	9	9	6	3	6	8	6	4	6	40	40	40	54.325	492	492	1	63
O88796	O88796	11	11	11	Ribonuclease P protein subunit p30	Rpp30	sp|O88796|RPP30_MOUSE Ribonuclease P protein subunit p30 OS=Mus musculus OX=10090 GN=Rpp30 PE=1 SV=1	1	11	11	11	6	9	10	5	9	8	9	8	4	11	6	9	10	5	9	8	9	8	4	11	6	9	10	5	9	8	9	8	4	11	54.5	54.5	54.5	29.473	268	268	1	90
O88811	O88811	6	5	5	Signal transducing adapter molecule 2	Stam2	sp|O88811|STAM2_MOUSE Signal transducing adapter molecule 2 OS=Mus musculus OX=10090 GN=Stam2 PE=1 SV=1	1	6	5	5	3	4	4	4	3	6	5	4	2	5	2	3	3	3	2	5	4	4	2	5	2	3	3	3	2	5	4	4	2	5	13.4	11.5	11.5	57.454	523	523	1	33
O88845	O88845	2	2	2	A-kinase anchor protein 10, mitochondrial	Akap10	sp|O88845|AKA10_MOUSE A-kinase anchor protein 10, mitochondrial OS=Mus musculus OX=10090 GN=Akap10 PE=1 SV=3	1	2	2	2	0	2	0	0	0	0	0	1	0	2	0	2	0	0	0	0	0	1	0	2	0	2	0	0	0	0	0	1	0	2	3.3	3.3	3.3	73.631	662	662	1	5
O88874	O88874	9	9	9	Cyclin-K	Ccnk	sp|O88874|CCNK_MOUSE Cyclin-K OS=Mus musculus OX=10090 GN=Ccnk PE=1 SV=3	1	9	9	9	5	8	5	5	5	7	7	6	2	9	5	8	5	5	5	7	7	6	2	9	5	8	5	5	5	7	7	6	2	9	25.1	25.1	25.1	61.363	554	554	1	60
O88895	O88895	10	9	9	Histone deacetylase 3	Hdac3	sp|O88895|HDAC3_MOUSE Histone deacetylase 3 OS=Mus musculus OX=10090 GN=Hdac3 PE=1 SV=1	1	10	9	9	3	6	6	3	4	7	5	7	3	8	2	5	5	2	3	6	4	6	2	7	2	5	5	2	3	6	4	6	2	7	39.6	37.7	37.7	48.364	424	424	1	51
O88939	O88939	3	3	3	Zinc finger and BTB domain-containing protein 7A	Zbtb7a	sp|O88939|ZBT7A_MOUSE Zinc finger and BTB domain-containing protein 7A OS=Mus musculus OX=10090 GN=Zbtb7a PE=1 SV=2	1	3	3	3	3	3	2	1	1	2	2	2	0	3	3	3	2	1	1	2	2	2	0	3	3	3	2	1	1	2	2	2	0	3	6.9	6.9	6.9	60.28	569	569	1	26
O88952;Q8JZS0;O88951	O88952;Q8JZS0	3;2;1	3;2;1	3;2;1	Protein lin-7 homolog C;Protein lin-7 homolog A	Lin7c;Lin7a	sp|O88952|LIN7C_MOUSE Protein lin-7 homolog C OS=Mus musculus OX=10090 GN=Lin7c PE=1 SV=2;sp|Q8JZS0|LIN7A_MOUSE Protein lin-7 homolog A OS=Mus musculus OX=10090 GN=Lin7a PE=1 SV=2	3	3	3	3	2	3	2	0	2	0	2	1	2	2	2	3	2	0	2	0	2	1	2	2	2	3	2	0	2	0	2	1	2	2	17.8	17.8	17.8	21.834	197	197;233;207	1	16
O89079	O89079	13	13	13	Coatomer subunit epsilon	Cope	sp|O89079|COPE_MOUSE Coatomer subunit epsilon OS=Mus musculus OX=10090 GN=Cope PE=1 SV=3	1	13	13	13	8	9	8	7	7	10	8	9	6	12	8	9	8	7	7	10	8	9	6	12	8	9	8	7	7	10	8	9	6	12	73.1	73.1	73.1	34.567	308	308	1	105
O89086	O89086	10	10	10	RNA-binding protein 3	Rbm3	sp|O89086|RBM3_MOUSE RNA-binding protein 3 OS=Mus musculus OX=10090 GN=Rbm3 PE=1 SV=1	1	10	10	10	5	5	7	6	8	9	9	8	9	9	5	5	7	6	8	9	9	8	9	9	5	5	7	6	8	9	9	8	9	9	67.3	67.3	67.3	16.604	153	153	1	124
O89090	O89090	4	4	4	Transcription factor Sp1	Sp1	sp|O89090|SP1_MOUSE Transcription factor Sp1 OS=Mus musculus OX=10090 GN=Sp1 PE=1 SV=2	1	4	4	4	2	2	3	4	4	4	4	4	3	4	2	2	3	4	4	4	4	4	3	4	2	2	3	4	4	4	4	4	3	4	10.6	10.6	10.6	80.731	784	784	1	36
O89094	O89094	2	2	2	Caspase-14;Caspase-14 subunit p17, mature form;Caspase-14 subunit p10, mature form;Caspase-14 subunit p20, intermediate form;Caspase-14 subunit p8, intermediate form	Casp14	sp|O89094|CASPE_MOUSE Caspase-14 OS=Mus musculus OX=10090 GN=Casp14 PE=1 SV=1	1	2	2	2	0	0	0	0	2	0	0	0	0	2	0	0	0	0	2	0	0	0	0	2	0	0	0	0	2	0	0	0	0	2	5.8	5.8	5.8	29.458	257	257	1	4
P00405	P00405	3	3	3	Cytochrome c oxidase subunit 2	Mtco2	sp|P00405|COX2_MOUSE Cytochrome c oxidase subunit 2 OS=Mus musculus OX=10090 GN=Mtco2 PE=1 SV=1	1	3	3	3	2	3	2	2	2	0	1	0	0	0	2	3	2	2	2	0	1	0	0	0	2	3	2	2	2	0	1	0	0	0	10.6	10.6	10.6	25.976	227	227	1	15
P00520	P00520	3	1	1	Tyrosine-protein kinase ABL1	Abl1	sp|P00520|ABL1_MOUSE Tyrosine-protein kinase ABL1 OS=Mus musculus OX=10090 GN=Abl1 PE=1 SV=3	1	3	1	1	1	2	2	1	1	3	2	2	0	3	0	1	1	0	0	1	1	1	0	1	0	1	1	0	0	1	1	1	0	1	3.7	1.8	1.8	122.67	1123	1123	1	6
P01887	P01887	2	2	2	Beta-2-microglobulin	B2m	sp|P01887|B2MG_MOUSE Beta-2-microglobulin OS=Mus musculus OX=10090 GN=B2m PE=1 SV=2	1	2	2	2	2	2	2	2	1	2	2	2	0	1	2	2	2	2	1	2	2	2	0	1	2	2	2	2	1	2	2	2	0	1	16	16	16	13.779	119	119	1	16
P01901;P79568;Q8HWB2;G3UXE9;P01896;P01898;P14430;P14429;P01897	P01901;P79568;Q8HWB2;G3UXE9;P01896;P01898;P14430;P14429;P01897	2;1;1;1;1;1;1;1;1	1;0;0;0;0;0;0;0;0	1;0;0;0;0;0;0;0;0	H-2 class I histocompatibility antigen, K-B alpha chain;H-2 class I histocompatibility antigen, alpha chain;H-2 class I histocompatibility antigen, Q10 alpha chain;H-2 class I histocompatibility antigen, Q8 alpha chain;H-2 class I histocompatibility antigen, Q7 alpha chain;H-2 class I histocompatibility antigen, L-D alpha chain	H2-K1;H2-Q6;H2-Q4;Gm8909;H2-Q10;H2-Q8;H2-Q7;H2-L	sp|P01901|HA1B_MOUSE H-2 class I histocompatibility antigen, K-B alpha chain OS=Mus musculus OX=10090 GN=H2-K1 PE=1 SV=1;tr|P79568|P79568_MOUSE Class Ib MHC antigen Qa-2 OS=Mus musculus OX=10090 GN=H2-Q6 PE=1 SV=1;tr|Q8HWB2|Q8HWB2_MOUSE Histocompatibility	9	2	1	1	2	1	1	1	1	1	1	0	0	1	1	1	1	1	1	1	1	0	0	1	1	1	1	1	1	1	1	0	0	1	6.2	3.5	3.5	41.301	369	369;326;354;396;185;325;326;334;362	1	8
P01942	P01942	6	6	5	Hemoglobin subunit alpha	Hba	sp|P01942|HBA_MOUSE Hemoglobin subunit alpha OS=Mus musculus OX=10090 GN=Hba PE=1 SV=2	1	6	6	5	1	1	1	1	1	1	6	2	0	1	1	1	1	1	1	1	6	2	0	1	0	0	0	0	0	0	5	1	0	0	62.7	62.7	56.3	15.085	142	142	1	17
P84244;P02301;P84228;P68433	P84244;P02301;P84228;P68433	5;5;4;4	5;5;4;4	5;5;4;4	Histone H3.3;Histone H3.3C;Histone H3.2;Histone H3.1	H3f3a;H3f3c;Hist1h3b;Hist1h3a	sp|P84244|H33_MOUSE Histone H3.3 OS=Mus musculus OX=10090 GN=H3-3b PE=1 SV=2;sp|P02301|H3C_MOUSE Histone H3.3C OS=Mus musculus OX=10090 GN=H3-5 PE=3 SV=3;sp|P84228|H32_MOUSE Histone H3.2 OS=Mus musculus OX=10090 GN=H3c15 PE=1 SV=2;sp|P68433|H31_MOUSE Histo	4	5	5	5	4	5	4	4	4	5	5	5	4	5	4	5	4	4	4	5	5	5	4	5	4	5	4	4	4	5	5	5	4	5	41.2	41.2	41.2	15.328	136	136;136;136;136	1	50
P03975	P03975	12	12	12	IgE-binding protein	Iap	sp|P03975|IGEB_MOUSE IgE-binding protein OS=Mus musculus OX=10090 GN=Iap PE=2 SV=1	1	12	12	12	9	12	11	11	9	9	5	6	3	10	9	12	11	11	9	9	5	6	3	10	9	12	11	11	9	9	5	6	3	10	30.3	30.3	30.3	62.747	557	557	1	90
P05064;A6ZI46;A6ZI47;P05063;Q91Y97	P05064;A6ZI46	21;16;8;2;1	21;16;8;2;1	21;16;8;2;1	Fructose-bisphosphate aldolase A;Fructose-bisphosphate aldolase	Aldoa;Aldoart1	sp|P05064|ALDOA_MOUSE Fructose-bisphosphate aldolase A OS=Mus musculus OX=10090 GN=Aldoa PE=1 SV=2;tr|A6ZI46|A6ZI46_MOUSE Fructose-bisphosphate aldolase OS=Mus musculus OX=10090 GN=Aldoart1 PE=1 SV=1	5	21	21	21	18	13	13	13	14	15	17	15	16	15	18	13	13	13	14	15	17	15	16	15	18	13	13	13	14	15	17	15	16	15	60.2	60.2	60.2	39.355	364	364;419;364;363;364	1	161
P68181;P05132	P68181;P05132	4;4	4;4	4;4	cAMP-dependent protein kinase catalytic subunit beta;cAMP-dependent protein kinase catalytic subunit alpha	Prkacb;Prkaca	sp|P68181|KAPCB_MOUSE cAMP-dependent protein kinase catalytic subunit beta OS=Mus musculus OX=10090 GN=Prkacb PE=1 SV=2;sp|P05132|KAPCA_MOUSE cAMP-dependent protein kinase catalytic subunit alpha OS=Mus musculus OX=10090 GN=Prkaca PE=1 SV=3	2	4	4	4	1	2	2	1	1	1	3	2	1	3	1	2	2	1	1	1	3	2	1	3	1	2	2	1	1	1	3	2	1	3	12	12	12	40.707	351	351;351	1	17
P05142	P05142	1	1	1	Proline-rich protein HaeIII subfamily 1	Prh1	sp|P05142|PRH1_MOUSE Proline-rich protein HaeIII subfamily 1 OS=Mus musculus OX=10090 GN=Prh1 PE=2 SV=2	1	1	1	1	0	1	0	0	0	1	0	1	0	1	0	1	0	0	0	1	0	1	0	1	0	1	0	0	0	1	0	1	0	1	5.4	5.4	5.4	26.09	261	261	1	4
P05202	P05202	14	14	14	Aspartate aminotransferase, mitochondrial	Got2	sp|P05202|AATM_MOUSE Aspartate aminotransferase, mitochondrial OS=Mus musculus OX=10090 GN=Got2 PE=1 SV=1	1	14	14	14	14	9	12	11	14	7	14	6	12	5	14	9	12	11	14	7	14	6	12	5	14	9	12	11	14	7	14	6	12	5	36.3	36.3	36.3	47.411	430	430	1	121
P05213;P68368;Q3UX10	P05213;P68368	24;19;2	24;19;2	2;2;0	Tubulin alpha-1B chain;Tubulin alpha-4A chain	Tuba1b;Tuba4a	sp|P05213|TBA1B_MOUSE Tubulin alpha-1B chain OS=Mus musculus OX=10090 GN=Tuba1b PE=1 SV=2;sp|P68368|TBA4A_MOUSE Tubulin alpha-4A chain OS=Mus musculus OX=10090 GN=Tuba4a PE=1 SV=1	3	24	24	2	17	20	14	17	15	19	17	19	13	21	17	20	14	17	15	19	17	19	13	21	2	2	2	2	2	1	2	2	0	1	65.9	65.9	3.1	50.151	451	451;448;446	1	239
P05627	P05627	3	2	2	Transcription factor AP-1	Jun	sp|P05627|JUN_MOUSE Transcription factor AP-1 OS=Mus musculus OX=10090 GN=Jun PE=1 SV=3	1	3	2	2	1	3	1	1	1	3	3	2	0	3	1	2	1	1	1	2	2	1	0	2	1	2	1	1	1	2	2	1	0	2	15	12.6	12.6	35.943	334	334	1	13
P05977;P09542	P05977;P09542	2;2	2;2	2;2	Myosin light chain 1/3, skeletal muscle isoform;Myosin light chain 3	Myl1;Myl3	sp|P05977|MYL1_MOUSE Myosin light chain 1/3, skeletal muscle isoform OS=Mus musculus OX=10090 GN=Myl1 PE=1 SV=2;sp|P09542|MYL3_MOUSE Myosin light chain 3 OS=Mus musculus OX=10090 GN=Myl3 PE=1 SV=4	2	2	2	2	1	1	0	2	2	1	1	1	1	1	1	1	0	2	2	1	1	1	1	1	1	1	0	2	2	1	1	1	1	1	8.5	8.5	8.5	20.594	188	188;204	1	11
P06151;P00342;P16125;Q8BVP2	P06151	13;2;2;1	13;2;2;1	13;2;2;1	L-lactate dehydrogenase A chain	Ldha	sp|P06151|LDHA_MOUSE L-lactate dehydrogenase A chain OS=Mus musculus OX=10090 GN=Ldha PE=1 SV=3	4	13	13	13	8	8	9	5	10	7	13	7	10	9	8	8	9	5	10	7	13	7	10	9	8	8	9	5	10	7	13	7	10	9	42.2	42.2	42.2	36.498	332	332;332;334;382	1	86
P06745;CON__Q3ZBD7	P06745	4;1	4;1	4;1	Glucose-6-phosphate isomerase	Gpi	sp|P06745|G6PI_MOUSE Glucose-6-phosphate isomerase OS=Mus musculus OX=10090 GN=Gpi PE=1 SV=4	2	4	4	4	1	0	0	0	1	1	2	0	1	4	1	0	0	0	1	1	2	0	1	4	1	0	0	0	1	1	2	0	1	4	10.2	10.2	10.2	62.766	558	558;557	1	10
P07356	P07356	11	11	11	Annexin A2	Anxa2	sp|P07356|ANXA2_MOUSE Annexin A2 OS=Mus musculus OX=10090 GN=Anxa2 PE=1 SV=2	1	11	11	11	7	2	4	4	10	7	10	8	6	10	7	2	4	4	10	7	10	8	6	10	7	2	4	4	10	7	10	8	6	10	36.3	36.3	36.3	38.676	339	339	1	71
P07724	P07724	3	2	2	Serum albumin	Alb	sp|P07724|ALBU_MOUSE Albumin OS=Mus musculus OX=10090 GN=Alb PE=1 SV=3	1	3	2	2	1	1	2	0	0	0	3	0	0	0	1	0	1	0	0	0	2	0	0	0	1	0	1	0	0	0	2	0	0	0	5.4	3.9	3.9	68.692	608	608	1	4
P07742	P07742	8	8	8	Ribonucleoside-diphosphate reductase large subunit	Rrm1	sp|P07742|RIR1_MOUSE Ribonucleoside-diphosphate reductase large subunit OS=Mus musculus OX=10090 GN=Rrm1 PE=1 SV=2	1	8	8	8	1	4	1	0	1	5	4	6	0	8	1	4	1	0	1	5	4	6	0	8	1	4	1	0	1	5	4	6	0	8	17.8	17.8	17.8	90.209	792	792	1	30
P07901	P07901	42	26	26	Heat shock protein HSP 90-alpha	Hsp90aa1	sp|P07901|HS90A_MOUSE Heat shock protein HSP 90-alpha OS=Mus musculus OX=10090 GN=Hsp90aa1 PE=1 SV=4	1	42	26	26	22	33	31	27	26	33	36	37	28	38	13	21	20	15	17	21	23	23	18	25	13	21	20	15	17	21	23	23	18	25	52.4	35.5	35.5	84.787	733	733	1	289
P07903	P07903	3	3	3	DNA excision repair protein ERCC-1	Ercc1	sp|P07903|ERCC1_MOUSE DNA excision repair protein ERCC-1 OS=Mus musculus OX=10090 GN=Ercc1 PE=2 SV=2	1	3	3	3	1	1	1	0	0	1	1	2	0	3	1	1	1	0	0	1	1	2	0	3	1	1	1	0	0	1	1	2	0	3	16.8	16.8	16.8	32.909	298	298	1	12
P08003	P08003	19	19	19	Protein disulfide-isomerase A4	Pdia4	sp|P08003|PDIA4_MOUSE Protein disulfide-isomerase A4 OS=Mus musculus OX=10090 GN=Pdia4 PE=1 SV=3	1	19	19	19	13	13	13	10	14	12	14	9	10	13	13	13	13	10	14	12	14	9	10	13	13	13	13	10	14	12	14	9	10	13	33.2	33.2	33.2	71.982	638	638	1	122
P08030	P08030	2	2	2	Adenine phosphoribosyltransferase	Aprt	sp|P08030|APT_MOUSE Adenine phosphoribosyltransferase OS=Mus musculus OX=10090 GN=Aprt PE=1 SV=2	1	2	2	2	0	0	1	0	0	1	1	0	0	2	0	0	1	0	0	1	1	0	0	2	0	0	1	0	0	1	1	0	0	2	20	20	20	19.724	180	180	1	5
P08113	P08113	41	39	39	Endoplasmin	Hsp90b1	sp|P08113|ENPL_MOUSE Endoplasmin OS=Mus musculus OX=10090 GN=Hsp90b1 PE=1 SV=2	1	41	39	39	29	34	35	31	32	33	34	35	25	36	27	32	33	29	30	31	32	33	23	34	27	32	33	29	30	31	32	33	23	34	52.1	50.4	50.4	92.475	802	802	1	517
P08228	P08228	5	5	5	Superoxide dismutase [Cu-Zn]	Sod1	sp|P08228|SODC_MOUSE Superoxide dismutase [Cu-Zn] OS=Mus musculus OX=10090 GN=Sod1 PE=1 SV=2	1	5	5	5	3	1	2	3	2	2	4	3	5	2	3	1	2	3	2	2	4	3	5	2	3	1	2	3	2	2	4	3	5	2	39	39	39	15.942	154	154	1	30
P08249	P08249	16	16	16	Malate dehydrogenase, mitochondrial	Mdh2	sp|P08249|MDHM_MOUSE Malate dehydrogenase, mitochondrial OS=Mus musculus OX=10090 GN=Mdh2 PE=1 SV=3	1	16	16	16	14	11	15	14	15	7	13	9	10	10	14	11	15	14	15	7	13	9	10	10	14	11	15	14	15	7	13	9	10	10	61.2	61.2	61.2	35.611	338	338	1	150
P08775;Q8R4Y4	P08775	37;1	37;1	36;0	DNA-directed RNA polymerase II subunit RPB1	Polr2a	sp|P08775|RPB1_MOUSE DNA-directed RNA polymerase II subunit RPB1 OS=Mus musculus OX=10090 GN=Polr2a PE=1 SV=3	2	37	37	36	16	26	27	23	22	20	19	21	11	30	16	26	27	23	22	20	19	21	11	30	16	25	26	23	22	20	18	20	11	29	25.5	25.5	25.2	217.17	1970	1970;2571	1	225
P09055	P09055	6	6	6	Integrin beta-1	Itgb1	sp|P09055|ITB1_MOUSE Integrin beta-1 OS=Mus musculus OX=10090 GN=Itgb1 PE=1 SV=1	1	6	6	6	4	5	4	4	4	2	3	3	1	3	4	5	4	4	4	2	3	3	1	3	4	5	4	4	4	2	3	3	1	3	11.2	11.2	11.2	88.231	798	798	1	33
P09103;REV__Q09XV5	P09103	32;1	32;1	31;0	Protein disulfide-isomerase	P4hb	sp|P09103|PDIA1_MOUSE Protein disulfide-isomerase OS=Mus musculus OX=10090 GN=P4hb PE=1 SV=2	2	32	32	31	21	29	28	29	25	27	26	28	20	28	21	29	28	29	25	27	26	28	20	28	20	28	27	28	25	26	25	27	19	27	65.2	65.2	64	57.058	509	509;2582	1	382
P09405	P09405	32	32	32	Nucleolin	Ncl	sp|P09405|NUCL_MOUSE Nucleolin OS=Mus musculus OX=10090 GN=Ncl PE=1 SV=2	1	32	32	32	22	25	26	28	27	26	26	26	26	27	22	25	26	28	27	26	26	26	26	27	22	25	26	28	27	26	26	26	26	27	39.3	39.3	39.3	76.722	707	707	1	584
P09411;P09041	P09411	8;2	8;2	8;2	Phosphoglycerate kinase 1	Pgk1	sp|P09411|PGK1_MOUSE Phosphoglycerate kinase 1 OS=Mus musculus OX=10090 GN=Pgk1 PE=1 SV=4	2	8	8	8	4	3	2	4	5	2	7	3	6	4	4	3	2	4	5	2	7	3	6	4	4	3	2	4	5	2	7	3	6	4	23.7	23.7	23.7	44.55	417	417;417	1	40
P09602	P09602	3	3	3	Non-histone chromosomal protein HMG-17	Hmgn2	sp|P09602|HMGN2_MOUSE Non-histone chromosomal protein HMG-17 OS=Mus musculus OX=10090 GN=Hmgn2 PE=1 SV=2	1	3	3	3	1	2	3	2	2	3	2	3	2	3	1	2	3	2	2	3	2	3	2	3	1	2	3	2	2	3	2	3	2	3	16.7	16.7	16.7	9.4226	90	90	1	33
Q3THW5;P0C0S6	Q3THW5;P0C0S6	3;3	1;1	1;1	Histone H2A.V;Histone H2A.Z	H2afv;H2afz	sp|Q3THW5|H2AV_MOUSE Histone H2A.V OS=Mus musculus OX=10090 GN=H2az2 PE=1 SV=3;sp|P0C0S6|H2AZ_MOUSE Histone H2A.Z OS=Mus musculus OX=10090 GN=H2az1 PE=1 SV=2	2	3	1	1	3	3	3	3	3	3	3	3	3	3	1	1	1	1	1	1	1	1	1	1	1	1	1	1	1	1	1	1	1	1	23.4	10.9	10.9	13.509	128	128;128	1	15
P0DP28;P0DP27;P0DP26;Q9D6P8;P20801	P0DP28;P0DP27;P0DP26;Q9D6P8	7;7;7;4;1	7;7;7;4;1	7;7;7;4;1	Calmodulin-like protein 3	Calml3	sp|P0DP28|CALM3_MOUSE Calmodulin-3 OS=Mus musculus OX=10090 GN=Calm3 PE=1 SV=1;sp|P0DP27|CALM2_MOUSE Calmodulin-2 OS=Mus musculus OX=10090 GN=Calm2 PE=1 SV=1;sp|P0DP26|CALM1_MOUSE Calmodulin-1 OS=Mus musculus OX=10090 GN=Calm1 PE=1 SV=1;sp|Q9D6P8|CALL3_MOU	5	7	7	7	4	6	6	6	6	7	7	7	7	7	4	6	6	6	6	7	7	7	7	7	4	6	6	6	6	7	7	7	7	7	43	43	43	16.837	149	149;149;149;149;160	1	150
P10126;P62631	P10126	28;10	28;10	28;10	Elongation factor 1-alpha 1	Eef1a1	sp|P10126|EF1A1_MOUSE Elongation factor 1-alpha 1 OS=Mus musculus OX=10090 GN=Eef1a1 PE=1 SV=3	2	28	28	28	19	25	23	24	21	24	25	28	22	27	19	25	23	24	21	24	25	28	22	27	19	25	23	24	21	24	25	28	22	27	64.9	64.9	64.9	50.113	462	462;463	1	527
P10630	P10630	16	3	3	Eukaryotic initiation factor 4A-II;Eukaryotic initiation factor 4A-II, N-terminally processed	Eif4a2	sp|P10630|IF4A2_MOUSE Eukaryotic initiation factor 4A-II OS=Mus musculus OX=10090 GN=Eif4a2 PE=1 SV=2	1	16	3	3	9	15	14	13	12	15	15	15	10	14	0	2	2	2	1	2	2	2	1	1	0	2	2	2	1	2	2	2	1	1	40	12	12	46.402	407	407	1	15
P10639	P10639	6	6	6	Thioredoxin	Txn	sp|P10639|THIO_MOUSE Thioredoxin OS=Mus musculus OX=10090 GN=Txn PE=1 SV=3	1	6	6	6	4	6	4	5	4	5	6	4	4	5	4	6	4	5	4	5	6	4	4	5	4	6	4	5	4	5	6	4	4	5	57.1	57.1	57.1	11.675	105	105	1	57
P10711;Q9QVN7	P10711	15;1	15;1	15;1	Transcription elongation factor A protein 1	Tcea1	sp|P10711|TCEA1_MOUSE Transcription elongation factor A protein 1 OS=Mus musculus OX=10090 GN=Tcea1 PE=1 SV=2	2	15	15	15	10	12	10	12	11	13	14	12	8	13	10	12	10	12	11	13	14	12	8	13	10	12	10	12	11	13	14	12	8	13	54.8	54.8	54.8	33.88	301	301;299	1	138
P10852	P10852	10	10	10	4F2 cell-surface antigen heavy chain	Slc3a2	sp|P10852|4F2_MOUSE 4F2 cell-surface antigen heavy chain OS=Mus musculus OX=10090 GN=Slc3a2 PE=1 SV=1	1	10	10	10	8	8	9	9	9	6	3	3	1	6	8	8	9	9	9	6	3	3	1	6	8	8	9	9	9	6	3	3	1	6	24.5	24.5	24.5	58.336	526	526	1	69
Q8CGP2;Q8CGP1;Q6ZWY9;Q64525;Q64478;Q64475;P10854;P10853;Q9D2U9;Q8CGP0;Q64524;P70696	Q8CGP2;Q8CGP1;Q6ZWY9;Q64525;Q64478;Q64475;P10854;P10853;Q9D2U9;Q8CGP0;Q64524;P70696	5;5;5;5;5;5;5;5;3;3;3;3	5;5;5;5;5;5;5;5;3;3;3;3	5;5;5;5;5;5;5;5;3;3;3;3	Histone H2B type 1-P;Histone H2B type 1-K;Histone H2B type 1-C/E/G;Histone H2B type 2-B;Histone H2B type 1-H;Histone H2B type 1-B;Histone H2B type 1-M;Histone H2B type 1-F/J/L;Histone H2B type 3-A;Histone H2B type 3-B;Histone H2B type 2-E;Histone H2B type 1-A	Hist1h2bp;Hist1h2bk;Hist1h2bc;Hist2h2bb;Hist1h2bh;Hist1h2bb;Hist1h2bm;Hist1h2bf;Hist3h2ba;Hist3h2bb;Hist2h2be;Hist1h2ba	sp|Q8CGP2|H2B1P_MOUSE Histone H2B type 1-P OS=Mus musculus OX=10090 GN=Hist1h2bp PE=1 SV=3;sp|Q8CGP1|H2B1K_MOUSE Histone H2B type 1-K OS=Mus musculus OX=10090 GN=H2bc12 PE=1 SV=3;sp|Q6ZWY9|H2B1C_MOUSE Histone H2B type 1-C/E/G OS=Mus musculus OX=10090 GN=H2	12	5	5	5	4	4	4	4	4	4	4	4	4	5	4	4	4	4	4	4	4	4	4	5	4	4	4	4	4	4	4	4	4	5	40.5	40.5	40.5	13.992	126	126;126;126;126;126;126;126;126;126;126;126;127	1	63
P10922	P10922	4	4	4	Histone H1.0;Histone H1.0, N-terminally processed	H1f0	sp|P10922|H10_MOUSE Histone H1.0 OS=Mus musculus OX=10090 GN=H1-0 PE=2 SV=4	1	4	4	4	2	2	2	2	4	4	4	4	2	3	2	2	2	2	4	4	4	4	2	3	2	2	2	2	4	4	4	4	2	3	18.6	18.6	18.6	20.861	194	194	1	29
P11031	P11031	7	7	7	Activated RNA polymerase II transcriptional coactivator p15	Sub1	sp|P11031|TCP4_MOUSE Activated RNA polymerase II transcriptional coactivator p15 OS=Mus musculus OX=10090 GN=Sub1 PE=1 SV=3	1	7	7	7	3	3	3	2	3	7	7	7	5	7	3	3	3	2	3	7	7	7	5	7	3	3	3	2	3	7	7	7	5	7	49.6	49.6	49.6	14.427	127	127	1	61
P11103	P11103	30	30	30	Poly [ADP-ribose] polymerase 1	Parp1	sp|P11103|PARP1_MOUSE Poly [ADP-ribose] polymerase 1 OS=Mus musculus OX=10090 GN=Parp1 PE=1 SV=3	1	30	30	30	14	18	18	15	17	27	23	27	17	27	14	18	18	15	17	27	23	27	17	27	14	18	18	15	17	27	23	27	17	27	35.6	35.6	35.6	113.1	1013	1013	1	281
P11276	P11276	4	4	4	Fibronectin;Anastellin	Fn1	sp|P11276|FINC_MOUSE Fibronectin OS=Mus musculus OX=10090 GN=Fn1 PE=1 SV=4	1	4	4	4	1	2	2	0	0	0	0	0	0	1	1	2	2	0	0	0	0	0	0	1	1	2	2	0	0	0	0	0	0	1	2.6	2.6	2.6	272.53	2477	2477	1	6
P11438	P11438	3	3	3	Lysosome-associated membrane glycoprotein 1	Lamp1	sp|P11438|LAMP1_MOUSE Lysosome-associated membrane glycoprotein 1 OS=Mus musculus OX=10090 GN=Lamp1 PE=1 SV=2	1	3	3	3	3	3	3	2	2	3	3	3	1	1	3	3	3	2	2	3	3	3	1	1	3	3	3	2	2	3	3	3	1	1	8.4	8.4	8.4	43.865	406	406	1	27
P11440	P11440	16	16	15	Cyclin-dependent kinase 1	Cdk1	sp|P11440|CDK1_MOUSE Cyclin-dependent kinase 1 OS=Mus musculus OX=10090 GN=Cdk1 PE=1 SV=3	1	16	16	15	4	7	6	3	6	11	11	9	8	13	4	7	6	3	6	11	11	9	8	13	3	6	5	2	5	10	10	8	7	12	59.3	59.3	56.6	34.106	297	297	1	83
P11499	P11499	48	48	30	Heat shock protein HSP 90-beta	Hsp90ab1	sp|P11499|HS90B_MOUSE Heat shock protein HSP 90-beta OS=Mus musculus OX=10090 GN=Hsp90ab1 PE=1 SV=3	1	48	48	30	32	39	38	37	36	40	42	42	35	44	32	39	38	37	36	40	42	42	35	44	21	25	25	23	25	26	27	26	23	29	59.5	59.5	41.3	83.28	724	724	1	744
P11983	P11983	34	34	34	T-complex protein 1 subunit alpha	Tcp1	sp|P11983|TCPA_MOUSE T-complex protein 1 subunit alpha OS=Mus musculus OX=10090 GN=Tcp1 PE=1 SV=3	1	34	34	34	23	32	32	27	28	33	31	33	19	34	23	32	32	27	28	33	31	33	19	34	23	32	32	27	28	33	31	33	19	34	74.6	74.6	74.6	60.448	556	556	1	422
P12367	P12367	3	3	3	cAMP-dependent protein kinase type II-alpha regulatory subunit	Prkar2a	sp|P12367|KAP2_MOUSE cAMP-dependent protein kinase type II-alpha regulatory subunit OS=Mus musculus OX=10090 GN=Prkar2a PE=1 SV=2	1	3	3	3	1	2	2	1	1	3	3	2	0	3	1	2	2	1	1	3	3	2	0	3	1	2	2	1	1	3	3	2	0	3	8	8	8	45.389	401	401	1	18
P12382;P47857	P12382;P47857	3;2	3;2	3;2	ATP-dependent 6-phosphofructokinase, liver type;ATP-dependent 6-phosphofructokinase, muscle type	Pfkl;Pfkm	sp|P12382|PFKAL_MOUSE ATP-dependent 6-phosphofructokinase, liver type OS=Mus musculus OX=10090 GN=Pfkl PE=1 SV=4;sp|P47857|PFKAM_MOUSE ATP-dependent 6-phosphofructokinase, muscle type OS=Mus musculus OX=10090 GN=Pfkm PE=1 SV=3	2	3	3	3	0	2	1	0	0	0	0	0	0	2	0	2	1	0	0	0	0	0	0	2	0	2	1	0	0	0	0	0	0	2	4.5	4.5	4.5	85.359	780	780;780	1	5
P12787	P12787	2	2	2	Cytochrome c oxidase subunit 5A, mitochondrial	Cox5a	sp|P12787|COX5A_MOUSE Cytochrome c oxidase subunit 5A, mitochondrial OS=Mus musculus OX=10090 GN=Cox5a PE=1 SV=2	1	2	2	2	1	2	2	2	1	0	0	0	0	0	1	2	2	2	1	0	0	0	0	0	1	2	2	2	1	0	0	0	0	0	17.1	17.1	17.1	16.101	146	146	1	8
P12970;V9GX35	P12970	17;4	17;4	17;4	60S ribosomal protein L7a	Rpl7a	sp|P12970|RL7A_MOUSE 60S ribosomal protein L7a OS=Mus musculus OX=10090 GN=Rpl7a PE=1 SV=2	2	17	17	17	15	14	13	14	14	17	15	16	14	15	15	14	13	14	14	17	15	16	14	15	15	14	13	14	14	17	15	16	14	15	56	56	56	29.976	266	266;225	1	172
P13020	P13020	19	19	12	Gelsolin	Gsn	sp|P13020|GELS_MOUSE Gelsolin OS=Mus musculus OX=10090 GN=Gsn PE=1 SV=3	1	19	19	12	8	14	14	14	13	15	16	16	7	15	8	14	14	14	13	15	16	16	7	15	3	10	10	9	8	11	12	11	4	9	38.1	38.1	25.4	85.941	780	780	1	139
P13439	P13439	4	4	4	Uridine 5-monophosphate synthase;Orotate phosphoribosyltransferase;Orotidine 5-phosphate decarboxylase	Umps	sp|P13439|UMPS_MOUSE Uridine 5-monophosphate synthase OS=Mus musculus OX=10090 GN=Umps PE=1 SV=3	1	4	4	4	2	2	2	0	1	2	1	3	0	4	2	2	2	0	1	2	1	3	0	4	2	2	2	0	1	2	1	3	0	4	11	11	11	52.292	481	481	1	17
P13705	P13705	3	3	3	DNA mismatch repair protein Msh3	Msh3	sp|P13705|MSH3_MOUSE DNA mismatch repair protein Msh3 OS=Mus musculus OX=10090 GN=Msh3 PE=2 SV=3	1	3	3	3	0	1	0	0	0	2	1	2	0	3	0	1	0	0	0	2	1	2	0	3	0	1	0	0	0	2	1	2	0	3	3.5	3.5	3.5	123.07	1091	1091	1	9
P13864	P13864	46	46	46	DNA (cytosine-5)-methyltransferase 1	Dnmt1	sp|P13864|DNMT1_MOUSE DNA (cytosine-5)-methyltransferase 1 OS=Mus musculus OX=10090 GN=Dnmt1 PE=1 SV=5	1	46	46	46	26	31	35	26	31	37	43	40	25	34	26	31	35	26	31	37	43	40	25	34	26	31	35	26	31	37	43	40	25	34	33.4	33.4	33.4	183.19	1620	1620	1	346
P14069	P14069	3	3	3	Protein S100-A6	S100a6	sp|P14069|S10A6_MOUSE Protein S100-A6 OS=Mus musculus OX=10090 GN=S100a6 PE=1 SV=3	1	3	3	3	2	2	2	2	2	3	3	3	2	3	2	2	2	2	2	3	3	3	2	3	2	2	2	2	2	3	3	3	2	3	19.1	19.1	19.1	10.051	89	89	1	41
P14094	P14094	2	2	2	Sodium/potassium-transporting ATPase subunit beta-1	Atp1b1	sp|P14094|AT1B1_MOUSE Sodium/potassium-transporting ATPase subunit beta-1 OS=Mus musculus OX=10090 GN=Atp1b1 PE=1 SV=1	1	2	2	2	1	2	1	0	0	0	0	0	0	1	1	2	1	0	0	0	0	0	0	1	1	2	1	0	0	0	0	0	0	1	8.2	8.2	8.2	35.194	304	304	1	5
P14115	P14115	5	5	5	60S ribosomal protein L27a	Rpl27a	sp|P14115|RL27A_MOUSE 60S ribosomal protein L27a OS=Mus musculus OX=10090 GN=Rpl27a PE=1 SV=5	1	5	5	5	4	5	4	4	4	5	4	4	3	4	4	5	4	4	4	5	4	4	3	4	4	5	4	4	4	5	4	4	3	4	28.4	28.4	28.4	16.605	148	148	1	47
P14131	P14131	10	10	10	40S ribosomal protein S16	Rps16	sp|P14131|RS16_MOUSE 40S ribosomal protein S16 OS=Mus musculus OX=10090 GN=Rps16 PE=1 SV=4	1	10	10	10	4	7	4	3	5	9	7	8	7	9	4	7	4	3	5	9	7	8	7	9	4	7	4	3	5	9	7	8	7	9	53.4	53.4	53.4	16.445	146	146	1	64
P14148	P14148	20	20	19	60S ribosomal protein L7	Rpl7	sp|P14148|RL7_MOUSE 60S ribosomal protein L7 OS=Mus musculus OX=10090 GN=Rpl7 PE=1 SV=2	1	20	20	19	18	16	19	15	14	14	14	11	13	10	18	16	19	15	14	14	14	11	13	10	17	15	18	14	13	13	13	10	12	9	59.6	59.6	57.4	31.419	270	270	1	164
P14152	P14152	3	3	3	Malate dehydrogenase, cytoplasmic	Mdh1	sp|P14152|MDHC_MOUSE Malate dehydrogenase, cytoplasmic OS=Mus musculus OX=10090 GN=Mdh1 PE=1 SV=3	1	3	3	3	1	1	1	0	1	1	3	2	2	3	1	1	1	0	1	1	3	2	2	3	1	1	1	0	1	1	3	2	2	3	11.7	11.7	11.7	36.511	334	334	1	15
P14206;REV__Q9D516	P14206	19;1	19;1	19;1	40S ribosomal protein SA	Rpsa	sp|P14206|RSSA_MOUSE 40S ribosomal protein SA OS=Mus musculus OX=10090 GN=Rpsa PE=1 SV=4	2	19	19	19	14	16	17	16	15	18	19	19	16	17	14	16	17	16	15	18	19	19	16	17	14	16	17	16	15	18	19	19	16	17	66.1	66.1	66.1	32.838	295	295;385	1	250
P14211	P14211	13	13	13	Calreticulin	Calr	sp|P14211|CALR_MOUSE Calreticulin OS=Mus musculus OX=10090 GN=Calr PE=1 SV=1	1	13	13	13	8	8	10	10	9	9	9	9	9	9	8	8	10	10	9	9	9	9	9	9	8	8	10	10	9	9	9	9	9	9	43	43	43	47.994	416	416	1	98
P14246	P14246	5	5	5	Solute carrier family 2, facilitated glucose transporter member 2	Slc2a2	sp|P14246|GTR2_MOUSE Solute carrier family 2, facilitated glucose transporter member 2 OS=Mus musculus OX=10090 GN=Slc2a2 PE=1 SV=3	1	5	5	5	3	4	3	3	5	1	2	3	1	4	3	4	3	3	5	1	2	3	1	4	3	4	3	3	5	1	2	3	1	4	9	9	9	57.106	523	523	1	29
P14576;E9PXC0	P14576;E9PXC0	12;11	12;11	12;11	Signal recognition particle 54 kDa protein	Srp54;Srp54c	sp|P14576|SRP54_MOUSE Signal recognition particle 54 kDa protein OS=Mus musculus OX=10090 GN=Srp54 PE=1 SV=2;tr|E9PXC0|E9PXC0_MOUSE Signal recognition particle 54 kDa protein OS=Mus musculus OX=10090 GN=Srp54c PE=1 SV=1	2	12	12	12	7	8	6	8	6	9	6	8	1	9	7	8	6	8	6	9	6	8	1	9	7	8	6	8	6	9	6	8	1	9	27.4	27.4	27.4	55.72	504	504;504	1	69
P14602	P14602	1	1	1	Heat shock protein beta-1	Hspb1	sp|P14602|HSPB1_MOUSE Heat shock protein beta-1 OS=Mus musculus OX=10090 GN=Hspb1 PE=1 SV=3	1	1	1	1	0	0	0	0	0	0	1	0	0	1	0	0	0	0	0	0	1	0	0	1	0	0	0	0	0	0	1	0	0	1	6.2	6.2	6.2	23.014	209	209	1	2
P14685	P14685	10	10	10	26S proteasome non-ATPase regulatory subunit 3	Psmd3	sp|P14685|PSMD3_MOUSE 26S proteasome non-ATPase regulatory subunit 3 OS=Mus musculus OX=10090 GN=Psmd3 PE=1 SV=3	1	10	10	10	3	6	3	1	1	6	6	8	0	9	3	6	3	1	1	6	6	8	0	9	3	6	3	1	1	6	6	8	0	9	19.4	19.4	19.4	60.718	530	530	1	43
P14733	P14733	28	27	26	Lamin-B1	Lmnb1	sp|P14733|LMNB1_MOUSE Lamin-B1 OS=Mus musculus OX=10090 GN=Lmnb1 PE=1 SV=3	1	28	27	26	21	23	21	22	21	9	12	9	5	10	21	23	20	22	21	9	11	8	5	9	20	22	19	21	20	9	10	8	5	9	44.2	44.2	42.5	66.785	588	588	1	164
P14824	P14824	8	8	8	Annexin A6	Anxa6	sp|P14824|ANXA6_MOUSE Annexin A6 OS=Mus musculus OX=10090 GN=Anxa6 PE=1 SV=3	1	8	8	8	5	6	7	6	4	6	6	5	3	7	5	6	7	6	4	6	6	5	3	7	5	6	7	6	4	6	6	5	3	7	14	14	14	75.884	673	673	1	56
P14869	P14869	16	16	16	60S acidic ribosomal protein P0	Rplp0	sp|P14869|RLA0_MOUSE 60S acidic ribosomal protein P0 OS=Mus musculus OX=10090 GN=Rplp0 PE=1 SV=3	1	16	16	16	14	16	16	14	14	16	15	16	11	16	14	16	16	14	14	16	15	16	11	16	14	16	16	14	14	16	15	16	11	16	58.4	58.4	58.4	34.216	317	317	1	199
P14873	P14873	98	98	95	Microtubule-associated protein 1B;MAP1B heavy chain;MAP1 light chain LC1	Map1b	sp|P14873|MAP1B_MOUSE Microtubule-associated protein 1B OS=Mus musculus OX=10090 GN=Map1b PE=1 SV=2	1	98	98	95	53	68	68	62	64	88	85	89	53	94	53	68	68	62	64	88	85	89	53	94	50	65	66	61	62	86	82	86	51	91	53.2	53.2	52.7	270.25	2464	2464	1	931
P15066	P15066	4	4	3	Transcription factor jun-D	Jund	sp|P15066|JUND_MOUSE Transcription factor jun-D OS=Mus musculus OX=10090 GN=Jund PE=1 SV=1	1	4	4	3	1	2	1	1	0	3	3	3	0	3	1	2	1	1	0	3	3	3	0	3	1	1	1	1	0	2	2	2	0	2	19.1	19.1	16.7	34.904	341	341	1	17
P15331;REV__A2TJV2;REV__Q6P542;REV__P81122;Q9D4H4	P15331	48;1;1;1;1	43;1;1;1;1	43;1;1;1;1	Peripherin	Prph	sp|P15331|PERI_MOUSE Peripherin OS=Mus musculus OX=10090 GN=Prph PE=1 SV=2	5	48	43	43	40	42	44	39	39	43	44	44	28	41	35	37	39	34	35	39	40	40	25	37	35	37	39	34	35	39	40	40	25	37	73.1	66.7	66.7	54.267	475	475;734;837;1321;968	1	491
P15806	P15806	6	5	5	Transcription factor E2-alpha	Tcf3	sp|P15806|TFE2_MOUSE Transcription factor E2-alpha OS=Mus musculus OX=10090 GN=Tcf3 PE=1 SV=2	1	6	5	5	4	4	4	4	3	6	4	4	0	6	3	3	3	3	2	5	3	3	0	5	3	3	3	3	2	5	3	3	0	5	19.4	18	18	67.7	651	651	1	38
P15864;Q07133	P15864	12;2	12;2	4;0	Histone H1.2	Hist1h1c	sp|P15864|H12_MOUSE Histone H1.2 OS=Mus musculus OX=10090 GN=H1-2 PE=1 SV=2	2	12	12	4	8	11	9	8	10	11	10	12	7	8	8	11	9	8	10	11	10	12	7	8	3	3	3	3	3	4	4	4	2	3	32.1	32.1	13.2	21.266	212	212;208	1	113
P16045	P16045	5	5	5	Galectin-1	Lgals1	sp|P16045|LEG1_MOUSE Galectin-1 OS=Mus musculus OX=10090 GN=Lgals1 PE=1 SV=3	1	5	5	5	4	4	5	4	4	3	5	4	4	4	4	4	5	4	4	3	5	4	4	4	4	4	5	4	4	3	5	4	4	4	48.1	48.1	48.1	14.866	135	135	1	48
P16254	P16254	6	6	6	Signal recognition particle 14 kDa protein;Signal recognition particle 14 kDa protein, N-terminally processed	Srp14	sp|P16254|SRP14_MOUSE Signal recognition particle 14 kDa protein OS=Mus musculus OX=10090 GN=Srp14 PE=1 SV=1	1	6	6	6	4	4	5	4	4	5	4	5	3	6	4	4	5	4	4	5	4	5	3	6	4	4	5	4	4	5	4	5	3	6	50	50	50	12.51	110	110	1	48
P16546;P08032	P16546	180;1	180;1	180;1	Spectrin alpha chain, non-erythrocytic 1	Sptan1	sp|P16546|SPTN1_MOUSE Spectrin alpha chain, non-erythrocytic 1 OS=Mus musculus OX=10090 GN=Sptan1 PE=1 SV=4	2	180	180	180	99	140	137	120	119	149	147	162	95	162	99	140	137	120	119	149	147	162	95	162	99	140	137	120	119	149	147	162	95	162	72.9	72.9	72.9	284.59	2472	2472;2415	1	1821
P16858;A0A1D5RLD8;S4R1W1;Q64467;V9GXA7;V9GX06	P16858;A0A1D5RLD8;S4R1W1	11;10;10;2;1;1	11;10;10;2;1;1	11;10;10;2;1;1	Glyceraldehyde-3-phosphate dehydrogenase	Gapdh;Gm3839	sp|P16858|G3P_MOUSE Glyceraldehyde-3-phosphate dehydrogenase OS=Mus musculus OX=10090 GN=Gapdh PE=1 SV=2;tr|A0A1D5RLD8|A0A1D5RLD8_MOUSE Glyceraldehyde-3-phosphate dehydrogenase OS=Mus musculus OX=10090 GN=Gm10358 PE=1 SV=1;tr|S4R1W1|S4R1W1_MOUSE Glyceralde	6	11	11	11	5	7	5	5	7	5	10	4	5	8	5	7	5	5	7	5	10	4	5	8	5	7	5	5	7	5	10	4	5	8	48.3	48.3	48.3	35.81	333	333;333;333;440;121;183	1	74
P16951	P16951	3	2	2	Cyclic AMP-dependent transcription factor ATF-2	Atf2	sp|P16951|ATF2_MOUSE Cyclic AMP-dependent transcription factor ATF-2 OS=Mus musculus OX=10090 GN=Atf2 PE=1 SV=2	1	3	2	2	3	2	3	3	3	2	3	2	1	2	2	1	2	2	2	1	2	1	0	1	2	1	2	2	2	1	2	1	0	1	7	4.7	4.7	52.297	487	487	1	15
P17047	P17047	2	2	2	Lysosome-associated membrane glycoprotein 2	Lamp2	sp|P17047|LAMP2_MOUSE Lysosome-associated membrane glycoprotein 2 OS=Mus musculus OX=10090 GN=Lamp2 PE=1 SV=2	1	2	2	2	0	1	2	1	1	2	2	2	0	2	0	1	2	1	1	2	2	2	0	2	0	1	2	1	1	2	2	2	0	2	4.6	4.6	4.6	45.681	415	415	1	13
P17095	P17095	3	3	3	High mobility group protein HMG-I/HMG-Y	Hmga1	sp|P17095|HMGA1_MOUSE High mobility group protein HMG-I/HMG-Y OS=Mus musculus OX=10090 GN=Hmga1 PE=1 SV=4	1	3	3	3	2	1	2	2	1	3	2	2	0	2	2	1	2	2	1	3	2	2	0	2	2	1	2	2	1	3	2	2	0	2	23.4	23.4	23.4	11.614	107	107	1	17
P17156	P17156	28	9	9	Heat shock-related 70 kDa protein 2	Hspa2	sp|P17156|HSP72_MOUSE Heat shock-related 70 kDa protein 2 OS=Mus musculus OX=10090 GN=Hspa2 PE=1 SV=2	1	28	9	9	21	19	22	21	18	24	23	24	16	23	6	5	5	5	3	5	6	7	2	7	6	5	5	5	3	5	6	7	2	7	38.5	19.7	19.7	69.641	633	633	1	53
P17182;P17183;P21550	P17182	15;2;1	15;2;1	15;2;1	Alpha-enolase	Eno1	sp|P17182|ENOA_MOUSE Alpha-enolase OS=Mus musculus OX=10090 GN=Eno1 PE=1 SV=3	3	15	15	15	8	7	9	4	8	9	13	10	7	13	8	7	9	4	8	9	13	10	7	13	8	7	9	4	8	9	13	10	7	13	44.7	44.7	44.7	47.14	434	434;434;434	1	92
P17225;B2RU80	P17225	20;1	19;1	16;0	Polypyrimidine tract-binding protein 1	Ptbp1	sp|P17225|PTBP1_MOUSE Polypyrimidine tract-binding protein 1 OS=Mus musculus OX=10090 GN=Ptbp1 PE=1 SV=2	2	20	19	16	14	19	16	17	15	20	19	20	15	19	14	18	16	17	15	19	18	19	14	18	12	16	14	15	13	16	15	16	12	15	64.7	63.6	58.8	56.477	527	527;1998	1	280
P17426	P17426	21	13	13	AP-2 complex subunit alpha-1	Ap2a1	sp|P17426|AP2A1_MOUSE AP-2 complex subunit alpha-1 OS=Mus musculus OX=10090 GN=Ap2a1 PE=1 SV=1	1	21	13	13	11	17	14	12	10	18	16	17	10	18	5	9	7	5	3	10	9	10	4	13	5	9	7	5	3	10	9	10	4	13	30.1	19.8	19.8	107.66	977	977	1	80
P17427	P17427	34	34	26	AP-2 complex subunit alpha-2	Ap2a2	sp|P17427|AP2A2_MOUSE AP-2 complex subunit alpha-2 OS=Mus musculus OX=10090 GN=Ap2a2 PE=1 SV=2	1	34	34	26	22	28	25	23	19	29	25	30	14	30	22	28	25	23	19	29	25	30	14	30	16	20	18	16	12	21	18	23	8	25	51.1	51.1	40.3	104.02	938	938	1	278
P17710	P17710	26	26	23	Hexokinase-1	Hk1	sp|P17710|HXK1_MOUSE Hexokinase-1 OS=Mus musculus OX=10090 GN=Hk1 PE=1 SV=3	1	26	26	23	20	23	22	21	21	12	15	16	10	14	20	23	22	21	21	12	15	16	10	14	18	21	20	18	19	10	13	14	9	12	30.2	30.2	28.7	108.3	974	974	1	186
P17742;V9GX31	P17742	13;2	12;2	12;2	Peptidyl-prolyl cis-trans isomerase A;Peptidyl-prolyl cis-trans isomerase A, N-terminally processed	Ppia	sp|P17742|PPIA_MOUSE Peptidyl-prolyl cis-trans isomerase A OS=Mus musculus OX=10090 GN=Ppia PE=1 SV=2	2	13	12	12	8	8	10	10	11	9	12	10	12	11	8	7	9	9	10	8	11	9	11	10	8	7	9	9	10	8	11	9	11	10	74.4	70.7	70.7	17.971	164	164;77	1	151
P17751	P17751	8	8	8	Triosephosphate isomerase	Tpi1	sp|P17751|TPIS_MOUSE Triosephosphate isomerase OS=Mus musculus OX=10090 GN=Tpi1 PE=1 SV=5	1	8	8	8	3	4	5	5	4	4	7	4	5	6	3	4	5	5	4	4	7	4	5	6	3	4	5	5	4	4	7	4	5	6	45.4	45.4	45.4	26.712	249	249	1	47
P17809	P17809	2	2	2	Solute carrier family 2, facilitated glucose transporter member 1	Slc2a1	sp|P17809|GTR1_MOUSE Solute carrier family 2, facilitated glucose transporter member 1 OS=Mus musculus OX=10090 GN=Slc2a1 PE=1 SV=4	1	2	2	2	1	2	2	0	0	1	0	0	0	1	1	2	2	0	0	1	0	0	0	1	1	2	2	0	0	1	0	0	0	1	3.7	3.7	3.7	53.984	492	492	1	7
P17879;Q61696	P17879;Q61696	19;18	10;9	7;6	Heat shock 70 kDa protein 1B;Heat shock 70 kDa protein 1A	Hspa1b;Hspa1a	sp|P17879|HS71B_MOUSE Heat shock 70 kDa protein 1B OS=Mus musculus OX=10090 GN=Hspa1b PE=1 SV=3;sp|Q61696|HS71A_MOUSE Heat shock 70 kDa protein 1A OS=Mus musculus OX=10090 GN=Hspa1a PE=1 SV=2	2	19	10	7	12	11	13	11	11	16	13	15	11	14	5	5	5	3	3	7	6	7	5	8	4	4	3	3	2	5	3	5	4	6	32.2	22.3	16.4	70.175	642	642;641	1	61
P17918	P17918	7	7	7	Proliferating cell nuclear antigen	Pcna	sp|P17918|PCNA_MOUSE Proliferating cell nuclear antigen OS=Mus musculus OX=10090 GN=Pcna PE=1 SV=2	1	7	7	7	5	1	1	1	3	6	7	4	4	5	5	1	1	1	3	6	7	4	4	5	5	1	1	1	3	6	7	4	4	5	33.7	33.7	33.7	28.785	261	261	1	39
P18242	P18242	3	3	3	Cathepsin D	Ctsd	sp|P18242|CATD_MOUSE Cathepsin D OS=Mus musculus OX=10090 GN=Ctsd PE=1 SV=1	1	3	3	3	2	2	1	2	1	2	1	1	0	3	2	2	1	2	1	2	1	1	0	3	2	2	1	2	1	2	1	1	0	3	11.2	11.2	11.2	44.953	410	410	1	15
P18572	P18572	3	3	3	Basigin	Bsg	sp|P18572|BASI_MOUSE Basigin OS=Mus musculus OX=10090 GN=Bsg PE=1 SV=2	1	3	3	3	2	3	3	2	3	1	2	1	1	1	2	3	3	2	3	1	2	1	1	1	2	3	3	2	3	1	2	1	1	1	8.2	8.2	8.2	42.444	389	389	1	19
P18760;P45591	P18760	11;1	11;1	11;1	Cofilin-1	Cfl1	sp|P18760|COF1_MOUSE Cofilin-1 OS=Mus musculus OX=10090 GN=Cfl1 PE=1 SV=3	2	11	11	11	9	8	9	9	9	11	11	8	9	8	9	8	9	9	9	11	11	8	9	8	9	8	9	9	9	11	11	8	9	8	64.5	64.5	64.5	18.559	166	166;166	1	108
P19096	P19096	42	42	42	Fatty acid synthase;[Acyl-carrier-protein] S-acetyltransferase;[Acyl-carrier-protein] S-malonyltransferase;3-oxoacyl-[acyl-carrier-protein] synthase;3-oxoacyl-[acyl-carrier-protein] reductase;3-hydroxyacyl-[acyl-carrier-protein] dehydratase;Enoyl-[acyl-carrier-protein] reductase;Oleoyl-[acyl-carrier-protein] hydrolase	Fasn	sp|P19096|FAS_MOUSE Fatty acid synthase OS=Mus musculus OX=10090 GN=Fasn PE=1 SV=2	1	42	42	42	2	22	6	2	3	19	17	29	3	40	2	22	6	2	3	19	17	29	3	40	2	22	6	2	3	19	17	29	3	40	26.2	26.2	26.2	272.43	2504	2504	1	152
P19157;P46425;F6RWR5	P19157;P46425	7;5;1	7;5;1	7;5;1	Glutathione S-transferase P 1;Glutathione S-transferase P 2	Gstp1;Gstp2	sp|P19157|GSTP1_MOUSE Glutathione S-transferase P 1 OS=Mus musculus OX=10090 GN=Gstp1 PE=1 SV=2;sp|P46425|GSTP2_MOUSE Glutathione S-transferase P 2 OS=Mus musculus OX=10090 GN=Gstp2 PE=1 SV=2	3	7	7	7	4	3	4	3	4	7	6	5	6	6	4	3	4	3	4	7	6	5	6	6	4	3	4	3	4	7	6	5	6	6	54.3	54.3	54.3	23.609	210	210;210;210	1	53
P19182	P19182	2	2	2	Interferon-related developmental regulator 1	Ifrd1	sp|P19182|IFRD1_MOUSE Interferon-related developmental regulator 1 OS=Mus musculus OX=10090 GN=Ifrd1 PE=1 SV=2	1	2	2	2	1	0	1	2	1	2	2	2	0	1	1	0	1	2	1	2	2	2	0	1	1	0	1	2	1	2	2	2	0	1	8.2	8.2	8.2	49.935	449	449	1	12
P19253;REV__P52825	P19253	11;1	11;1	11;1	60S ribosomal protein L13a	Rpl13a	sp|P19253|RL13A_MOUSE 60S ribosomal protein L13a OS=Mus musculus OX=10090 GN=Rpl13a PE=1 SV=4	2	11	11	11	6	9	8	6	8	10	8	8	6	9	6	9	8	6	8	10	8	8	6	9	6	9	8	6	8	10	8	8	6	9	42.9	42.9	42.9	23.464	203	203;658	1	85
P19426	P19426	7	7	7	Negative elongation factor E	Nelfe	sp|P19426|NELFE_MOUSE Negative elongation factor E OS=Mus musculus OX=10090 GN=Nelfe PE=1 SV=2	1	7	7	7	2	5	3	4	3	5	4	6	0	6	2	5	3	4	3	5	4	6	0	6	2	5	3	4	3	5	4	6	0	6	26.4	26.4	26.4	42.554	375	375	1	43
P19536	P19536	3	3	3	Cytochrome c oxidase subunit 5B, mitochondrial	Cox5b	sp|P19536|COX5B_MOUSE Cytochrome c oxidase subunit 5B, mitochondrial OS=Mus musculus OX=10090 GN=Cox5b PE=1 SV=1	1	3	3	3	2	3	3	2	3	0	1	0	0	1	2	3	3	2	3	0	1	0	0	1	2	3	3	2	3	0	1	0	0	1	21.9	21.9	21.9	13.813	128	128	1	15
P19783	P19783	5	5	5	Cytochrome c oxidase subunit 4 isoform 1, mitochondrial	Cox4i1	sp|P19783|COX41_MOUSE Cytochrome c oxidase subunit 4 isoform 1, mitochondrial OS=Mus musculus OX=10090 GN=Cox4i1 PE=1 SV=2	1	5	5	5	2	4	2	2	1	1	1	0	0	0	2	4	2	2	1	1	1	0	0	0	2	4	2	2	1	1	1	0	0	0	36.1	36.1	36.1	19.53	169	169	1	13
P20029	P20029	36	33	33	78 kDa glucose-regulated protein	Hspa5	sp|P20029|BIP_MOUSE Endoplasmic reticulum chaperone BiP OS=Mus musculus OX=10090 GN=Hspa5 PE=1 SV=3	1	36	33	33	30	33	32	31	32	31	32	31	29	31	27	30	29	28	30	28	30	28	27	28	27	30	29	28	30	28	30	28	27	28	51	51	51	72.421	655	655	1	404
P20108	P20108	4	4	4	Thioredoxin-dependent peroxide reductase, mitochondrial	Prdx3	sp|P20108|PRDX3_MOUSE Thioredoxin-dependent peroxide reductase, mitochondrial OS=Mus musculus OX=10090 GN=Prdx3 PE=1 SV=1	1	4	4	4	4	3	3	3	1	1	2	2	1	3	4	3	3	3	1	1	2	2	1	3	4	3	3	3	1	1	2	2	1	3	24.9	24.9	24.9	28.127	257	257	1	23
P20152;P31001;P03995	P20152	67;6;4	67;6;4	58;2;2	Vimentin	Vim	sp|P20152|VIME_MOUSE Vimentin OS=Mus musculus OX=10090 GN=Vim PE=1 SV=3	3	67	67	58	52	57	59	62	63	57	61	57	56	57	52	57	59	62	63	57	61	57	56	57	44	49	51	53	56	50	54	50	50	49	89.9	89.9	79.4	53.687	466	466;469;430	1	1281
P20664	P20664	3	3	3	DNA primase small subunit	Prim1	sp|P20664|PRI1_MOUSE DNA primase small subunit OS=Mus musculus OX=10090 GN=Prim1 PE=1 SV=1	1	3	3	3	0	2	1	0	0	2	3	3	0	2	0	2	1	0	0	2	3	3	0	2	0	2	1	0	0	2	3	3	0	2	10.3	10.3	10.3	49.295	417	417	1	13
P21107	P21107	8	2	2	Tropomyosin alpha-3 chain	Tpm3	sp|P21107|TPM3_MOUSE Tropomyosin alpha-3 chain OS=Mus musculus OX=10090 GN=Tpm3 PE=1 SV=3	1	8	2	2	4	4	5	7	7	7	7	7	7	5	1	1	1	2	2	2	2	2	1	1	1	1	1	2	2	2	2	2	1	1	20.4	4.9	4.9	32.994	285	285	1	15
P21126	P21126	4	4	4	Ubiquitin-like protein 4A	Ubl4a	sp|P21126|UBL4A_MOUSE Ubiquitin-like protein 4A OS=Mus musculus OX=10090 GN=Ubl4a PE=1 SV=1	1	4	4	4	1	2	1	0	0	1	2	3	1	3	1	2	1	0	0	1	2	3	1	3	1	2	1	0	0	1	2	3	1	3	31.2	31.2	31.2	17.8	157	157	1	14
P21619	P21619	17	15	15	Lamin-B2	Lmnb2	sp|P21619|LMNB2_MOUSE Lamin-B2 OS=Mus musculus OX=10090 GN=Lmnb2 PE=1 SV=2	1	17	15	15	13	12	15	11	15	5	4	4	1	5	12	11	13	10	14	5	2	3	1	4	12	11	13	10	14	5	2	3	1	4	33.1	31.4	31.4	67.317	596	596	1	75
P21995	P21995	3	3	3	Embigin	Emb	sp|P21995|EMB_MOUSE Embigin OS=Mus musculus OX=10090 GN=Emb PE=1 SV=2	1	3	3	3	2	3	3	2	1	0	0	0	0	1	2	3	3	2	1	0	0	0	0	1	2	3	3	2	1	0	0	0	0	1	9.1	9.1	9.1	37.064	330	330	1	12
P22892	P22892	12	12	12	AP-1 complex subunit gamma-1	Ap1g1	sp|P22892|AP1G1_MOUSE AP-1 complex subunit gamma-1 OS=Mus musculus OX=10090 GN=Ap1g1 PE=1 SV=3	1	12	12	12	7	11	6	7	3	8	7	9	2	9	7	11	6	7	3	8	7	9	2	9	7	11	6	7	3	8	7	9	2	9	21.9	21.9	21.9	91.349	822	822	1	69
P22907	P22907	2	2	2	Porphobilinogen deaminase	Hmbs	sp|P22907|HEM3_MOUSE Porphobilinogen deaminase OS=Mus musculus OX=10090 GN=Hmbs PE=1 SV=2	1	2	2	2	0	0	1	0	0	1	1	2	0	1	0	0	1	0	0	1	1	2	0	1	0	0	1	0	0	1	1	2	0	1	10.8	10.8	10.8	39.344	361	361	1	6
P23116	P23116	70	70	70	Eukaryotic translation initiation factor 3 subunit A	Eif3a	sp|P23116|EIF3A_MOUSE Eukaryotic translation initiation factor 3 subunit A OS=Mus musculus OX=10090 GN=Eif3a PE=1 SV=5	1	70	70	70	40	54	51	46	40	59	55	62	27	60	40	54	51	46	40	59	55	62	27	60	40	54	51	46	40	59	55	62	27	60	49	49	49	161.93	1344	1344	1	608
P23198	P23198	6	5	4	Chromobox protein homolog 3	Cbx3	sp|P23198|CBX3_MOUSE Chromobox protein homolog 3 OS=Mus musculus OX=10090 GN=Cbx3 PE=1 SV=2	1	6	5	4	3	3	4	4	3	5	5	4	3	6	2	2	3	3	2	4	4	3	2	5	1	1	2	2	1	3	3	2	1	4	36.1	29.5	20.8	20.855	183	183	1	38
P23249	P23249	28	28	28	Putative helicase MOV-10	Mov10	sp|P23249|MOV10_MOUSE Putative helicase MOV-10 OS=Mus musculus OX=10090 GN=Mov10 PE=1 SV=2	1	28	28	28	8	12	8	10	4	25	15	23	6	26	8	12	8	10	4	25	15	23	6	26	8	12	8	10	4	25	15	23	6	26	35.1	35.1	35.1	113.58	1004	1004	1	141
P23475	P23475	15	15	15	X-ray repair cross-complementing protein 6	Xrcc6	sp|P23475|XRCC6_MOUSE X-ray repair cross-complementing protein 6 OS=Mus musculus OX=10090 GN=Xrcc6 PE=1 SV=5	1	15	15	15	5	8	2	2	2	13	11	12	4	15	5	8	2	2	2	13	11	12	4	15	5	8	2	2	2	13	11	12	4	15	33.6	33.6	33.6	69.483	608	608	1	80
P23708	P23708	2	2	2	Nuclear transcription factor Y subunit alpha	Nfya	sp|P23708|NFYA_MOUSE Nuclear transcription factor Y subunit alpha OS=Mus musculus OX=10090 GN=Nfya PE=1 SV=2	1	2	2	2	0	1	2	2	2	2	2	2	0	1	0	1	2	2	2	2	2	2	0	1	0	1	2	2	2	2	2	2	0	1	11.6	11.6	11.6	36.778	346	346	1	23
P23798	P23798	5	5	2	Polycomb group RING finger protein 2	Pcgf2	sp|P23798|PCGF2_MOUSE Polycomb group RING finger protein 2 OS=Mus musculus OX=10090 GN=Pcgf2 PE=1 SV=2	1	5	5	2	2	4	3	2	2	4	3	5	2	2	2	4	3	2	2	4	3	5	2	2	0	1	1	0	0	1	0	2	0	0	12	12	5.6	37.723	342	342	1	29
P23881	P23881	2	2	2	Transcription elongation factor A protein 3	Tcea3	sp|P23881|TCEA3_MOUSE Transcription elongation factor A protein 3 OS=Mus musculus OX=10090 GN=Tcea3 PE=1 SV=3	1	2	2	2	1	1	2	1	2	2	1	1	0	2	1	1	2	1	2	2	1	1	0	2	1	1	2	1	2	2	1	1	0	2	8.1	8.1	8.1	38.849	347	347	1	13
P23906	P23906	4	4	4	Interferon regulatory factor 2	Irf2	sp|P23906|IRF2_MOUSE Interferon regulatory factor 2 OS=Mus musculus OX=10090 GN=Irf2 PE=1 SV=1	1	4	4	4	1	2	2	0	0	3	2	3	0	3	1	2	2	0	0	3	2	3	0	3	1	2	2	0	0	3	2	3	0	3	18.1	18.1	18.1	39.452	349	349	1	16
P24369	P24369	16	16	15	Peptidyl-prolyl cis-trans isomerase B	Ppib	sp|P24369|PPIB_MOUSE Peptidyl-prolyl cis-trans isomerase B OS=Mus musculus OX=10090 GN=Ppib PE=1 SV=2	1	16	16	15	14	14	14	14	15	13	13	13	10	12	14	14	14	14	15	13	13	13	10	12	14	13	13	13	14	12	12	12	9	11	59.3	59.3	56.5	23.713	216	216	1	166
P24452	P24452	4	4	4	Macrophage-capping protein	Capg	sp|P24452|CAPG_MOUSE Macrophage-capping protein OS=Mus musculus OX=10090 GN=Capg PE=1 SV=2	1	4	4	4	0	4	1	0	1	2	2	4	1	1	0	4	1	0	1	2	2	4	1	1	0	4	1	0	1	2	2	4	1	1	10.2	10.2	10.2	39.24	352	352	1	16
P24547	P24547	6	6	6	Inosine-5-monophosphate dehydrogenase 2	Impdh2	sp|P24547|IMDH2_MOUSE Inosine-5-monophosphate dehydrogenase 2 OS=Mus musculus OX=10090 GN=Impdh2 PE=1 SV=2	1	6	6	6	3	5	3	2	4	3	5	2	2	6	3	5	3	2	4	3	5	2	2	6	3	5	3	2	4	3	5	2	2	6	16	16	16	55.814	514	514	1	35
P24668	P24668	3	3	3	Cation-dependent mannose-6-phosphate receptor	M6pr	sp|P24668|MPRD_MOUSE Cation-dependent mannose-6-phosphate receptor OS=Mus musculus OX=10090 GN=M6pr PE=1 SV=1	1	3	3	3	3	3	3	1	1	2	2	2	1	2	3	3	3	1	1	2	2	2	1	2	3	3	3	1	1	2	2	2	1	2	14.4	14.4	14.4	31.172	278	278	1	20
P24788;Q64434	P24788	16;1	15;1	15;1	Cyclin-dependent kinase 11B	Cdk11b	sp|P24788|CD11B_MOUSE Cyclin-dependent kinase 11B OS=Mus musculus OX=10090 GN=Cdk11b PE=1 SV=2	2	16	15	15	6	7	7	6	10	10	6	11	2	12	6	6	6	6	9	9	5	10	2	12	6	6	6	6	9	9	5	10	2	12	20.8	20.8	20.8	91.512	784	784;451	1	73
P24860	P24860	2	2	2	G2/mitotic-specific cyclin-B1	Ccnb1	sp|P24860|CCNB1_MOUSE G2/mitotic-specific cyclin-B1 OS=Mus musculus OX=10090 GN=Ccnb1 PE=1 SV=3	1	2	2	2	0	1	0	0	0	1	2	2	1	1	0	1	0	0	0	1	2	2	1	1	0	1	0	0	0	1	2	2	1	1	4.7	4.7	4.7	48.051	430	430	1	8
P25206	P25206	22	22	22	DNA replication licensing factor MCM3	Mcm3	sp|P25206|MCM3_MOUSE DNA replication licensing factor MCM3 OS=Mus musculus OX=10090 GN=Mcm3 PE=1 SV=2	1	22	22	22	12	17	16	12	12	13	15	16	6	16	12	17	16	12	12	13	15	16	6	16	12	17	16	12	12	13	15	16	6	16	36.2	36.2	36.2	91.545	812	812	1	149
P25425;P31362;Q00196;Q00286;Q07916;P20263;P62515;P31360;P21952;P31361	P25425	9;4;4;1;1;1;1;1;1;1	9;4;4;1;1;1;1;1;1;1	9;4;4;1;1;1;1;1;1;1	POU domain, class 2, transcription factor 1	Pou2f1	sp|P25425|PO2F1_MOUSE POU domain, class 2, transcription factor 1 OS=Mus musculus OX=10090 GN=Pou2f1 PE=1 SV=3	10	9	9	9	6	6	8	7	5	8	7	8	4	9	6	6	8	7	5	8	7	8	4	9	6	6	8	7	5	8	7	8	4	9	21.4	21.4	21.4	79.546	770	770;431;463;291;301;352;361;445;449;497	1	80
P25444;Q6Y4S4	P25444	14;1	14;1	14;1	40S ribosomal protein S2	Rps2	sp|P25444|RS2_MOUSE 40S ribosomal protein S2 OS=Mus musculus OX=10090 GN=Rps2 PE=1 SV=3	2	14	14	14	12	13	12	9	12	13	14	14	9	13	12	13	12	9	12	13	14	14	9	13	12	13	12	9	12	13	14	14	9	13	51.2	51.2	51.2	31.231	293	293;130	1	137
P25916	P25916	5	2	2	Polycomb complex protein BMI-1	Bmi1	sp|P25916|BMI1_MOUSE Polycomb complex protein BMI-1 OS=Mus musculus OX=10090 GN=Bmi1 PE=1 SV=1	1	5	2	2	4	4	4	4	3	5	5	5	4	2	2	1	2	2	1	2	2	2	2	0	2	1	2	2	1	2	2	2	2	0	12.7	5.9	5.9	36.707	324	324	1	17
P25976	P25976	5	5	5	Nucleolar transcription factor 1	Ubtf	sp|P25976|UBF1_MOUSE Nucleolar transcription factor 1 OS=Mus musculus OX=10090 GN=Ubtf PE=1 SV=1	1	5	5	5	1	2	1	1	2	4	2	3	0	1	1	2	1	1	2	4	2	3	0	1	1	2	1	1	2	4	2	3	0	1	10.7	10.7	10.7	89.508	765	765	1	17
P26039	P26039	64	64	56	Talin-1	Tln1	sp|P26039|TLN1_MOUSE Talin-1 OS=Mus musculus OX=10090 GN=Tln1 PE=1 SV=2	1	64	64	56	31	46	41	35	28	48	38	57	11	57	31	46	41	35	28	48	38	57	11	57	27	41	33	29	23	42	32	49	8	50	38.7	38.7	34.7	269.82	2541	2541	1	418
P26040	P26040	15	7	7	Ezrin	Ezr	sp|P26040|EZRI_MOUSE Ezrin OS=Mus musculus OX=10090 GN=Ezr PE=1 SV=3	1	15	7	7	8	9	11	9	10	13	12	13	9	10	3	4	5	4	4	6	6	6	5	3	3	4	5	4	4	6	6	6	5	3	24.4	14.8	14.8	69.406	586	586	1	46
P26043;P26041	P26043;P26041	16;8	16;8	8;1	Radixin;Moesin	Rdx;Msn	sp|P26043|RADI_MOUSE Radixin OS=Mus musculus OX=10090 GN=Rdx PE=1 SV=3;sp|P26041|MOES_MOUSE Moesin OS=Mus musculus OX=10090 GN=Msn PE=1 SV=3	2	16	16	8	8	7	11	8	7	12	12	13	7	14	8	7	11	8	7	12	12	13	7	14	3	2	5	3	1	5	6	6	3	7	27.3	27.3	17.7	68.542	583	583;577	1	100
P26231;REV__Q9JMB1;Q65CL1	P26231	24;1;1	24;1;1	21;0;1	Catenin alpha-1	Ctnna1	sp|P26231|CTNA1_MOUSE Catenin alpha-1 OS=Mus musculus OX=10090 GN=Ctnna1 PE=1 SV=1	3	24	24	21	8	12	17	11	12	21	19	22	7	23	8	12	17	11	12	21	19	22	7	23	6	9	15	10	10	18	16	19	6	20	39.5	39.5	36.1	100.11	906	906;375;895	1	157
P26350	P26350	2	2	2	Prothymosin alpha;Prothymosin alpha, N-terminally processed;Thymosin alpha	Ptma	sp|P26350|PTMA_MOUSE Prothymosin alpha OS=Mus musculus OX=10090 GN=Ptma PE=1 SV=2	1	2	2	2	0	0	0	0	0	0	2	2	1	1	0	0	0	0	0	0	2	2	1	1	0	0	0	0	0	0	2	2	1	1	22.5	22.5	22.5	12.254	111	111	1	9
P26369	P26369	19	19	19	Splicing factor U2AF 65 kDa subunit	U2af2	sp|P26369|U2AF2_MOUSE Splicing factor U2AF 65 kDa subunit OS=Mus musculus OX=10090 GN=U2af2 PE=1 SV=3	1	19	19	19	15	16	15	12	15	15	15	15	11	19	15	16	15	12	15	15	15	15	11	19	15	16	15	12	15	15	15	15	11	19	54.1	54.1	54.1	53.516	475	475	1	247
P26443	P26443	4	4	4	Glutamate dehydrogenase 1, mitochondrial	Glud1	sp|P26443|DHE3_MOUSE Glutamate dehydrogenase 1, mitochondrial OS=Mus musculus OX=10090 GN=Glud1 PE=1 SV=1	1	4	4	4	3	3	4	4	3	1	4	3	1	1	3	3	4	4	3	1	4	3	1	1	3	3	4	4	3	1	4	3	1	1	7.7	7.7	7.7	61.336	558	558	1	27
P26516	P26516	9	9	9	26S proteasome non-ATPase regulatory subunit 7	Psmd7	sp|P26516|PSMD7_MOUSE 26S proteasome non-ATPase regulatory subunit 7 OS=Mus musculus OX=10090 GN=Psmd7 PE=1 SV=2	1	9	9	9	2	7	6	1	3	5	2	6	0	9	2	7	6	1	3	5	2	6	0	9	2	7	6	1	3	5	2	6	0	9	47.4	47.4	47.4	36.539	321	321	1	48
P26638	P26638	3	3	3	Serine--tRNA ligase, cytoplasmic	Sars	sp|P26638|SYSC_MOUSE Serine--tRNA ligase, cytoplasmic OS=Mus musculus OX=10090 GN=Sars1 PE=1 SV=3	1	3	3	3	2	1	1	0	1	1	2	1	1	3	2	1	1	0	1	1	2	1	1	3	2	1	1	0	1	1	2	1	1	3	5.1	5.1	5.1	58.388	512	512	1	14
P26645	P26645	7	7	7	Myristoylated alanine-rich C-kinase substrate	Marcks	sp|P26645|MARCS_MOUSE Myristoylated alanine-rich C-kinase substrate OS=Mus musculus OX=10090 GN=Marcks PE=1 SV=2	1	7	7	7	3	4	3	1	2	4	5	5	3	7	3	4	3	1	2	4	5	5	3	7	3	4	3	1	2	4	5	5	3	7	36.9	36.9	36.9	29.661	309	309	1	37
P26883	P26883	2	2	2	Peptidyl-prolyl cis-trans isomerase FKBP1A	Fkbp1a	sp|P26883|FKB1A_MOUSE Peptidyl-prolyl cis-trans isomerase FKBP1A OS=Mus musculus OX=10090 GN=Fkbp1a PE=1 SV=2	1	2	2	2	2	2	1	1	0	0	2	2	1	2	2	2	1	1	0	0	2	2	1	2	2	2	1	1	0	0	2	2	1	2	27.8	27.8	27.8	11.922	108	108	1	13
P27048;P63163	P27048;P63163	8;8	8;8	8;8	Small nuclear ribonucleoprotein-associated protein B;Small nuclear ribonucleoprotein-associated protein N	Snrpb;Snrpn	sp|P27048|RSMB_MOUSE Small nuclear ribonucleoprotein-associated protein B OS=Mus musculus OX=10090 GN=Snrpb PE=1 SV=1;sp|P63163|RSMN_MOUSE Small nuclear ribonucleoprotein-associated protein N OS=Mus musculus OX=10090 GN=Snrpn PE=1 SV=1	2	8	8	8	8	8	7	8	8	8	8	8	8	7	8	8	7	8	8	8	8	8	8	7	8	8	7	8	8	8	8	8	8	7	28.6	28.6	28.6	23.656	231	231;240	1	127
P27546	P27546	20	20	20	Microtubule-associated protein 4	Map4	sp|P27546|MAP4_MOUSE Microtubule-associated protein 4 OS=Mus musculus OX=10090 GN=Map4 PE=1 SV=3	1	20	20	20	12	10	12	10	13	11	14	13	9	15	12	10	12	10	13	11	14	13	9	15	12	10	12	10	13	11	14	13	9	15	28.5	28.5	28.5	117.43	1125	1125	1	119
P27612	P27612	12	12	12	Phospholipase A-2-activating protein	Plaa	sp|P27612|PLAP_MOUSE Phospholipase A-2-activating protein OS=Mus musculus OX=10090 GN=Plaa PE=1 SV=4	1	12	12	12	1	6	2	2	0	5	2	9	0	11	1	6	2	2	0	5	2	9	0	11	1	6	2	2	0	5	2	9	0	11	20.9	20.9	20.9	87.22	794	794	1	38
P27641	P27641	8	8	8	X-ray repair cross-complementing protein 5	Xrcc5	sp|P27641|XRCC5_MOUSE X-ray repair cross-complementing protein 5 OS=Mus musculus OX=10090 GN=Xrcc5 PE=1 SV=4	1	8	8	8	2	2	2	0	3	6	6	7	2	5	2	2	2	0	3	6	6	7	2	5	2	2	2	0	3	6	6	7	2	5	13.7	13.7	13.7	83.056	732	732	1	35
P27659;E9PWZ3	P27659	16;2	16;2	16;2	60S ribosomal protein L3	Rpl3	sp|P27659|RL3_MOUSE 60S ribosomal protein L3 OS=Mus musculus OX=10090 GN=Rpl3 PE=1 SV=3	2	16	16	16	13	12	14	11	13	16	15	16	10	13	13	12	14	11	13	16	15	16	10	13	13	12	14	11	13	16	15	16	10	13	43.4	43.4	43.4	46.109	403	403;407	1	161
P27661;Q64522	P27661;Q64522	4;2	1;1	1;1	Histone H2AX;Histone H2A type 2-B	H2afx;Hist2h2ab	sp|P27661|H2AX_MOUSE Histone H2AX OS=Mus musculus OX=10090 GN=H2ax PE=1 SV=2;sp|Q64522|H2A2B_MOUSE Histone H2A type 2-B OS=Mus musculus OX=10090 GN=H2ac21 PE=1 SV=3	2	4	1	1	4	4	4	4	4	4	4	4	3	3	1	1	1	1	1	1	1	1	0	1	1	1	1	1	1	1	1	1	0	1	32.2	16.1	16.1	15.142	143	143;130	1	17
P27773	P27773	27	27	27	Protein disulfide-isomerase A3	Pdia3	sp|P27773|PDIA3_MOUSE Protein disulfide-isomerase A3 OS=Mus musculus OX=10090 GN=Pdia3 PE=1 SV=2	1	27	27	27	25	22	21	21	22	20	24	21	22	22	25	22	21	21	22	20	24	21	22	22	25	22	21	21	22	20	24	21	22	22	58.8	58.8	58.8	56.678	505	505	1	262
P28271	P28271	6	6	6	Cytoplasmic aconitate hydratase	Aco1	sp|P28271|ACOC_MOUSE Cytoplasmic aconitate hydratase OS=Mus musculus OX=10090 GN=Aco1 PE=1 SV=3	1	6	6	6	3	2	3	0	2	2	5	4	1	5	3	2	3	0	2	2	5	4	1	5	3	2	3	0	2	2	5	4	1	5	9.9	9.9	9.9	98.124	889	889	1	33
P28352	P28352	6	6	6	DNA-(apurinic or apyrimidinic site) lyase;DNA-(apurinic or apyrimidinic site) lyase, mitochondrial	Apex1	sp|P28352|APEX1_MOUSE DNA-(apurinic or apyrimidinic site) endonuclease OS=Mus musculus OX=10090 GN=Apex1 PE=1 SV=2	1	6	6	6	5	3	5	5	4	3	4	5	6	4	5	3	5	5	4	3	4	5	6	4	5	3	5	5	4	3	4	5	6	4	26.5	26.5	26.5	35.49	317	317	1	44
P28574	P28574	4	4	4	Protein max	Max	sp|P28574|MAX_MOUSE Protein max OS=Mus musculus OX=10090 GN=Max PE=1 SV=2	1	4	4	4	2	3	2	3	3	4	3	4	3	3	2	3	2	3	3	4	3	4	3	3	2	3	2	3	3	4	3	4	3	3	33.1	33.1	33.1	18.245	160	160	1	30
P28656	P28656	6	6	4	Nucleosome assembly protein 1-like 1	Nap1l1	sp|P28656|NP1L1_MOUSE Nucleosome assembly protein 1-like 1 OS=Mus musculus OX=10090 GN=Nap1l1 PE=1 SV=2	1	6	6	4	3	5	5	4	5	6	6	6	4	6	3	5	5	4	5	6	6	6	4	6	2	4	3	2	3	4	4	4	3	4	19.4	19.4	16.6	45.345	391	391	1	56
P28658	P28658	13	13	13	Ataxin-10	Atxn10	sp|P28658|ATX10_MOUSE Ataxin-10 OS=Mus musculus OX=10090 GN=Atxn10 PE=1 SV=2	1	13	13	13	5	8	6	2	4	9	10	10	1	12	5	8	6	2	4	9	10	10	1	12	5	8	6	2	4	9	10	10	1	12	35.4	35.4	35.4	53.706	475	475	1	67
P28659;Q9Z0H4	P28659	10;2	10;2	10;2	CUGBP Elav-like family member 1	Celf1	sp|P28659|CELF1_MOUSE CUGBP Elav-like family member 1 OS=Mus musculus OX=10090 GN=Celf1 PE=1 SV=2	2	10	10	10	4	7	6	5	2	8	6	9	5	10	4	7	6	5	2	8	6	9	5	10	4	7	6	5	2	8	6	9	5	10	26.1	26.1	26.1	52.107	486	486;508	1	73
P28660	P28660	12	12	12	Nck-associated protein 1	Nckap1	sp|P28660|NCKP1_MOUSE Nck-associated protein 1 OS=Mus musculus OX=10090 GN=Nckap1 PE=1 SV=2	1	12	12	12	2	7	7	1	3	7	7	10	1	9	2	7	7	1	3	7	7	10	1	9	2	7	7	1	3	7	7	10	1	9	15.6	15.6	15.6	128.78	1128	1128	1	54
P28667	P28667	1	1	1	MARCKS-related protein	Marcksl1	sp|P28667|MRP_MOUSE MARCKS-related protein OS=Mus musculus OX=10090 GN=Marcksl1 PE=1 SV=2	1	1	1	1	1	1	1	1	1	1	1	1	1	1	1	1	1	1	1	1	1	1	1	1	1	1	1	1	1	1	1	1	1	1	7.5	7.5	7.5	20.165	200	200	1	10
P28700;P28705	P28700	7;3	4;1	4;1	Retinoic acid receptor RXR-alpha	Rxra	sp|P28700|RXRA_MOUSE Retinoic acid receptor RXR-alpha OS=Mus musculus OX=10090 GN=Rxra PE=1 SV=1	2	7	4	4	5	5	5	4	6	5	6	7	0	5	2	2	3	2	3	3	3	4	0	3	2	2	3	2	3	3	3	4	0	3	18	11.3	11.3	51.216	467	467;463	1	25
P28704	P28704	11	11	8	Retinoic acid receptor RXR-beta	Rxrb	sp|P28704|RXRB_MOUSE Retinoic acid receptor RXR-beta OS=Mus musculus OX=10090 GN=Rxrb PE=1 SV=2	1	11	11	8	7	9	7	6	7	8	8	10	3	7	7	9	7	6	7	8	8	10	3	7	4	6	5	4	4	6	5	7	3	5	27.9	27.9	21.9	55.865	520	520	1	72
P28740	P28740	13	13	12	Kinesin-like protein KIF2A	Kif2a	sp|P28740|KIF2A_MOUSE Kinesin-like protein KIF2A OS=Mus musculus OX=10090 GN=Kif2a PE=1 SV=2	1	13	13	12	4	7	5	4	3	6	4	10	3	12	4	7	5	4	3	6	4	10	3	12	3	6	4	3	3	5	3	9	3	11	22	22	20.7	79.755	705	705	1	63
P28798	P28798	4	4	4	Granulins;Acrogranin;Granulin-1;Granulin-2;Granulin-3;Granulin-4;Granulin-5;Granulin-6;Granulin-7	Grn	sp|P28798|GRN_MOUSE Progranulin OS=Mus musculus OX=10090 GN=Grn PE=1 SV=2	1	4	4	4	2	4	3	2	2	3	3	3	1	4	2	4	3	2	2	3	3	3	1	4	2	4	3	2	2	3	3	3	1	4	12.4	12.4	12.4	63.458	589	589	1	27
P29037;Q6SJ95	P29037;Q6SJ95	2;1	2;1	2;1	TATA-box-binding protein;TATA box-binding protein-like protein 2	Tbp;Tbpl2	sp|P29037|TBP_MOUSE TATA-box-binding protein OS=Mus musculus OX=10090 GN=Tbp PE=1 SV=1;sp|Q6SJ95|TBPL2_MOUSE TATA box-binding protein-like 2 OS=Mus musculus OX=10090 GN=Tbpl2 PE=1 SV=1	2	2	2	2	1	2	1	0	1	2	1	2	0	1	1	2	1	0	1	2	1	2	0	1	1	2	1	0	1	2	1	2	0	1	8.5	8.5	8.5	34.709	316	316;350	1	11
P29341;Q9D4E6	P29341	42;16	42;16	22;6	Polyadenylate-binding protein 1	Pabpc1	sp|P29341|PABP1_MOUSE Polyadenylate-binding protein 1 OS=Mus musculus OX=10090 GN=Pabpc1 PE=1 SV=2	2	42	42	22	28	30	32	27	30	35	37	35	26	37	28	30	32	27	30	35	37	35	26	37	13	13	14	11	14	18	19	17	16	20	71.7	71.7	44.7	70.67	636	636;643	1	474
P29351	P29351	2	2	2	Tyrosine-protein phosphatase non-receptor type 6	Ptpn6	sp|P29351|PTN6_MOUSE Tyrosine-protein phosphatase non-receptor type 6 OS=Mus musculus OX=10090 GN=Ptpn6 PE=1 SV=2	1	2	2	2	0	0	0	0	0	0	0	0	0	2	0	0	0	0	0	0	0	0	0	2	0	0	0	0	0	0	0	0	0	2	3.5	3.5	3.5	67.558	595	595	1	2
P29758	P29758	4	4	4	Ornithine aminotransferase, mitochondrial	Oat	sp|P29758|OAT_MOUSE Ornithine aminotransferase, mitochondrial OS=Mus musculus OX=10090 GN=Oat PE=1 SV=1	1	4	4	4	3	1	2	1	1	2	3	2	2	2	3	1	2	1	1	2	3	2	2	2	3	1	2	1	1	2	3	2	2	2	9.1	9.1	9.1	48.354	439	439	1	19
P30051;P70210;P48301;Q62296	P30051;P70210;P48301	3;3;2;1	3;3;2;1	3;3;2;1	Transcriptional enhancer factor TEF-1;Transcriptional enhancer factor TEF-5;Transcriptional enhancer factor TEF-4	Tead1;Tead3;Tead2	sp|P30051|TEAD1_MOUSE Transcriptional enhancer factor TEF-1 OS=Mus musculus OX=10090 GN=Tead1 PE=1 SV=2;sp|P70210|TEAD3_MOUSE Transcriptional enhancer factor TEF-5 OS=Mus musculus OX=10090 GN=Tead3 PE=2 SV=2;sp|P48301|TEAD2_MOUSE Transcriptional enhancer f	4	3	3	3	2	1	2	1	2	2	0	2	1	1	2	1	2	1	2	2	0	2	1	1	2	1	2	1	2	2	0	2	1	1	7.5	7.5	7.5	47.947	426	426;439;445;427	1	14
P30285	P30285	5	4	4	Cyclin-dependent kinase 4	Cdk4	sp|P30285|CDK4_MOUSE Cyclin-dependent kinase 4 OS=Mus musculus OX=10090 GN=Cdk4 PE=1 SV=1	1	5	4	4	1	2	1	2	1	3	2	5	1	4	0	1	0	1	0	2	1	4	0	3	0	1	0	1	0	2	1	4	0	3	25.4	22.8	22.8	33.75	303	303	1	12
P30416	P30416	22	22	22	Peptidyl-prolyl cis-trans isomerase FKBP4;Peptidyl-prolyl cis-trans isomerase FKBP4, N-terminally processed	Fkbp4	sp|P30416|FKBP4_MOUSE Peptidyl-prolyl cis-trans isomerase FKBP4 OS=Mus musculus OX=10090 GN=Fkbp4 PE=1 SV=5	1	22	22	22	12	15	11	5	10	16	16	20	7	22	12	15	11	5	10	16	16	20	7	22	12	15	11	5	10	16	16	20	7	22	61.4	61.4	61.4	51.572	458	458	1	154
P30681	P30681	10	6	6	High mobility group protein B2	Hmgb2	sp|P30681|HMGB2_MOUSE High mobility group protein B2 OS=Mus musculus OX=10090 GN=Hmgb2 PE=1 SV=3	1	10	6	6	10	8	9	8	9	8	10	7	9	8	6	5	6	5	6	6	6	5	6	6	6	5	6	5	6	6	6	5	6	6	40.5	28.6	28.6	24.162	210	210	1	106
P30999	P30999	28	28	28	Catenin delta-1	Ctnnd1	sp|P30999|CTND1_MOUSE Catenin delta-1 OS=Mus musculus OX=10090 GN=Ctnnd1 PE=1 SV=2	1	28	28	28	15	17	16	7	10	23	21	20	5	23	15	17	16	7	10	23	21	20	5	23	15	17	16	7	10	23	21	20	5	23	40.7	40.7	40.7	104.92	938	938	1	172
P31230	P31230	11	11	11	Aminoacyl tRNA synthase complex-interacting multifunctional protein 1;Endothelial monocyte-activating polypeptide 2	Aimp1	sp|P31230|AIMP1_MOUSE Aminoacyl tRNA synthase complex-interacting multifunctional protein 1 OS=Mus musculus OX=10090 GN=Aimp1 PE=1 SV=2	1	11	11	11	5	7	5	7	6	8	7	10	3	7	5	7	5	7	6	8	7	10	3	7	5	7	5	7	6	8	7	10	3	7	54.8	54.8	54.8	33.997	310	310	1	67
P31257	P31257	2	2	2	Homeobox protein Hox-C10	Hoxc10	sp|P31257|HXC10_MOUSE Homeobox protein Hox-C10 OS=Mus musculus OX=10090 GN=Hoxc10 PE=2 SV=1	1	2	2	2	1	1	1	1	0	1	1	2	0	0	1	1	1	1	0	1	1	2	0	0	1	1	1	1	0	1	1	2	0	0	7	7	7	38.195	342	342	1	8
P31266	P31266	12	12	12	Recombining binding protein suppressor of hairless	Rbpj	sp|P31266|SUH_MOUSE Recombining binding protein suppressor of hairless OS=Mus musculus OX=10090 GN=Rbpj PE=1 SV=1	1	12	12	12	8	9	6	5	2	9	10	11	4	9	8	9	6	5	2	9	10	11	4	9	8	9	6	5	2	9	10	11	4	9	32.5	32.5	32.5	58.537	526	526	1	73
P31324	P31324	2	2	2	cAMP-dependent protein kinase type II-beta regulatory subunit	Prkar2b	sp|P31324|KAP3_MOUSE cAMP-dependent protein kinase type II-beta regulatory subunit OS=Mus musculus OX=10090 GN=Prkar2b PE=1 SV=3	1	2	2	2	0	1	1	1	2	2	1	2	0	2	0	1	1	1	2	2	1	2	0	2	0	1	1	1	2	2	1	2	0	2	7.9	7.9	7.9	46.167	416	416	1	12
P31786	P31786	2	2	2	Acyl-CoA-binding protein	Dbi	sp|P31786|ACBP_MOUSE Acyl-CoA-binding protein OS=Mus musculus OX=10090 GN=Dbi PE=1 SV=2	1	2	2	2	2	1	2	2	2	2	2	1	2	1	2	1	2	2	2	2	2	1	2	1	2	1	2	2	2	2	2	1	2	1	39.1	39.1	39.1	10	87	87	1	17
P32020	P32020	4	4	4	Non-specific lipid-transfer protein	Scp2	sp|P32020|SCP2_MOUSE Sterol carrier protein 2 OS=Mus musculus OX=10090 GN=Scp2 PE=1 SV=3	1	4	4	4	2	3	2	2	3	1	2	1	1	3	2	3	2	2	3	1	2	1	1	3	2	3	2	2	3	1	2	1	1	3	8.6	8.6	8.6	59.125	547	547	1	20
P32067;O55028	P32067	25;1	25;1	25;1	Lupus La protein homolog	Ssb	sp|P32067|LA_MOUSE Lupus La protein homolog OS=Mus musculus OX=10090 GN=Ssb PE=1 SV=1	2	25	25	25	18	21	23	21	19	24	24	24	18	24	18	21	23	21	19	24	24	24	18	24	18	21	23	21	19	24	24	24	18	24	51.8	51.8	51.8	47.756	415	415;412	1	262
P32233	P32233	17	17	17	Developmentally-regulated GTP-binding protein 1	Drg1	sp|P32233|DRG1_MOUSE Developmentally-regulated GTP-binding protein 1 OS=Mus musculus OX=10090 GN=Drg1 PE=1 SV=1	1	17	17	17	6	13	10	8	4	12	12	11	6	16	6	13	10	8	4	12	12	11	6	16	6	13	10	8	4	12	12	11	6	16	64	64	64	40.512	367	367	1	109
P32921	P32921	7	7	7	Tryptophan--tRNA ligase, cytoplasmic;T1-TrpRS;T2-TrpRS	Wars	sp|P32921|SYWC_MOUSE Tryptophan--tRNA ligase, cytoplasmic OS=Mus musculus OX=10090 GN=Wars1 PE=1 SV=2	1	7	7	7	3	4	3	3	3	1	5	3	3	5	3	4	3	3	3	1	5	3	3	5	3	4	3	3	3	1	5	3	3	5	20.2	20.2	20.2	54.357	481	481	1	33
P33174;E9PX57;P28741	P33174	32;1;1	32;1;1	32;1;1	Chromosome-associated kinesin KIF4	Kif4	sp|P33174|KIF4_MOUSE Chromosome-associated kinesin KIF4 OS=Mus musculus OX=10090 GN=Kif4 PE=1 SV=3	3	32	32	32	8	15	12	9	10	23	18	27	4	31	8	15	12	9	10	23	18	27	4	31	8	15	12	9	10	23	18	27	4	31	38.7	38.7	38.7	139.52	1231	1231;802;701	1	157
P33215	P33215	7	7	7	Protein NEDD1	Nedd1	sp|P33215|NEDD1_MOUSE Protein NEDD1 OS=Mus musculus OX=10090 GN=Nedd1 PE=1 SV=2	1	7	7	7	2	4	2	0	2	2	3	5	0	7	2	4	2	0	2	2	3	5	0	7	2	4	2	0	2	2	3	5	0	7	16.2	16.2	16.2	71.292	660	660	1	28
P33609	P33609	6	6	6	DNA polymerase alpha catalytic subunit	Pola1	sp|P33609|DPOLA_MOUSE DNA polymerase alpha catalytic subunit OS=Mus musculus OX=10090 GN=Pola1 PE=1 SV=2	1	6	6	6	0	1	0	0	1	4	4	4	0	6	0	1	0	0	1	4	4	4	0	6	0	1	0	0	1	4	4	4	0	6	5.4	5.4	5.4	167.34	1465	1465	1	20
P33610	P33610	3	3	3	DNA primase large subunit	Prim2	sp|P33610|PRI2_MOUSE DNA primase large subunit OS=Mus musculus OX=10090 GN=Prim2 PE=1 SV=1	1	3	3	3	1	1	1	0	0	2	1	3	0	2	1	1	1	0	0	2	1	3	0	2	1	1	1	0	0	2	1	3	0	2	6.7	6.7	6.7	58.408	505	505	1	11
P33611	P33611	1	1	1	DNA polymerase alpha subunit B	Pola2	sp|P33611|DPOA2_MOUSE DNA polymerase alpha subunit B OS=Mus musculus OX=10090 GN=Pola2 PE=1 SV=2	1	1	1	1	0	0	0	0	0	1	0	1	0	1	0	0	0	0	0	1	0	1	0	1	0	0	0	0	0	1	0	1	0	1	2.2	2.2	2.2	66.213	600	600	1	3
P34022	P34022	6	6	6	Ran-specific GTPase-activating protein	Ranbp1	sp|P34022|RANG_MOUSE Ran-specific GTPase-activating protein OS=Mus musculus OX=10090 GN=Ranbp1 PE=1 SV=2	1	6	6	6	4	5	5	5	4	5	4	5	3	6	4	5	5	5	4	5	4	5	3	6	4	5	5	5	4	5	4	5	3	6	40.4	40.4	40.4	23.596	203	203	1	61
P34152	P34152	17	17	17	Focal adhesion kinase 1	Ptk2	sp|P34152|FAK1_MOUSE Focal adhesion kinase 1 OS=Mus musculus OX=10090 GN=Ptk2 PE=1 SV=4	1	17	17	17	10	10	12	7	5	12	12	14	2	13	10	10	12	7	5	12	12	14	2	13	10	10	12	7	5	12	12	14	2	13	22.6	22.6	22.6	119.24	1052	1052	1	103
P34884	P34884	3	3	3	Macrophage migration inhibitory factor	Mif	sp|P34884|MIF_MOUSE Macrophage migration inhibitory factor OS=Mus musculus OX=10090 GN=Mif PE=1 SV=2	1	3	3	3	3	2	3	2	2	3	3	3	3	3	3	2	3	2	2	3	3	3	3	3	3	2	3	2	2	3	3	3	3	3	35.7	35.7	35.7	12.504	115	115	1	36
P35278;Q9CQD1;P61021	P35278	6;2;2	6;2;2	6;2;2	Ras-related protein Rab-5C	Rab5c	sp|P35278|RAB5C_MOUSE Ras-related protein Rab-5C OS=Mus musculus OX=10090 GN=Rab5c PE=1 SV=2	3	6	6	6	3	5	4	3	2	6	2	4	1	4	3	5	4	3	2	6	2	4	1	4	3	5	4	3	2	6	2	4	1	4	37.5	37.5	37.5	23.412	216	216;215;215	1	34
P35279;P61294;Q8BHD0	P35279;P61294	4;3;1	4;3;1	4;3;1	Ras-related protein Rab-6A;Ras-related protein Rab-6B	Rab6a;Rab6b	sp|P35279|RAB6A_MOUSE Ras-related protein Rab-6A OS=Mus musculus OX=10090 GN=Rab6a PE=1 SV=4;sp|P61294|RAB6B_MOUSE Ras-related protein Rab-6B OS=Mus musculus OX=10090 GN=Rab6b PE=1 SV=1	3	4	4	4	3	2	3	2	3	3	1	1	1	2	3	2	3	2	3	3	1	1	1	2	3	2	3	2	3	3	1	1	1	2	22.6	22.6	22.6	23.59	208	208;208;217	1	27
P35293	P35293	2	2	2	Ras-related protein Rab-18	Rab18	sp|P35293|RAB18_MOUSE Ras-related protein Rab-18 OS=Mus musculus OX=10090 GN=Rab18 PE=1 SV=2	1	2	2	2	2	2	2	1	0	1	1	0	0	1	2	2	2	1	0	1	1	0	0	1	2	2	2	1	0	1	1	0	0	1	12.6	12.6	12.6	23.035	206	206	1	10
P35486	P35486	17	17	17	Pyruvate dehydrogenase E1 component subunit alpha, somatic form, mitochondrial	Pdha1	sp|P35486|ODPA_MOUSE Pyruvate dehydrogenase E1 component subunit alpha, somatic form, mitochondrial OS=Mus musculus OX=10090 GN=Pdha1 PE=1 SV=1	1	17	17	17	10	16	16	9	13	10	5	9	1	7	10	16	16	9	13	10	5	9	1	7	10	16	16	9	13	10	5	9	1	7	48.7	48.7	48.7	43.231	390	390	1	104
P35492	P35492	3	3	3	Histidine ammonia-lyase	Hal	sp|P35492|HUTH_MOUSE Histidine ammonia-lyase OS=Mus musculus OX=10090 GN=Hal PE=1 SV=1	1	3	3	3	0	0	0	0	2	0	2	0	0	0	0	0	0	0	2	0	2	0	0	0	0	0	0	0	2	0	2	0	0	0	5.3	5.3	5.3	72.257	657	657	1	4
P35550	P35550	16	16	13	rRNA 2-O-methyltransferase fibrillarin	Fbl	sp|P35550|FBRL_MOUSE rRNA 2-O-methyltransferase fibrillarin OS=Mus musculus OX=10090 GN=Fbl PE=1 SV=2	1	16	16	13	10	13	15	12	10	13	13	13	10	13	10	13	15	12	10	13	13	13	10	13	7	10	12	9	7	10	10	10	7	10	62.1	62.1	54.4	34.306	327	327	1	152
P35564	P35564	23	23	23	Calnexin	Canx	sp|P35564|CALX_MOUSE Calnexin OS=Mus musculus OX=10090 GN=Canx PE=1 SV=1	1	23	23	23	16	19	18	17	14	11	7	11	9	13	16	19	18	17	14	11	7	11	9	13	16	19	18	17	14	11	7	11	9	13	41.8	41.8	41.8	67.277	591	591	1	158
P35585;Q9WVP1	P35585	14;1	14;1	14;1	AP-1 complex subunit mu-1	Ap1m1	sp|P35585|AP1M1_MOUSE AP-1 complex subunit mu-1 OS=Mus musculus OX=10090 GN=Ap1m1 PE=1 SV=3	2	14	14	14	8	10	8	7	4	13	9	9	0	11	8	10	8	7	4	13	9	9	0	11	8	10	8	7	4	13	9	9	0	11	43.7	43.7	43.7	48.542	423	423;423	1	95
P35601	P35601	22	22	22	Replication factor C subunit 1	Rfc1	sp|P35601|RFC1_MOUSE Replication factor C subunit 1 OS=Mus musculus OX=10090 GN=Rfc1 PE=1 SV=2	1	22	22	22	11	13	10	7	11	19	13	14	11	19	11	13	10	7	11	19	13	14	11	19	11	13	10	7	11	19	13	14	11	19	24.1	24.1	24.1	125.98	1131	1131	1	132
P35700	P35700	18	18	16	Peroxiredoxin-1	Prdx1	sp|P35700|PRDX1_MOUSE Peroxiredoxin-1 OS=Mus musculus OX=10090 GN=Prdx1 PE=1 SV=1	1	18	18	16	15	16	15	13	14	16	15	16	14	14	15	16	15	13	14	16	15	16	14	14	14	14	13	12	12	15	14	14	12	12	70.9	70.9	70.9	22.176	199	199	1	201
P35831	P35831	1	1	1	Tyrosine-protein phosphatase non-receptor type 12	Ptpn12	sp|P35831|PTN12_MOUSE Tyrosine-protein phosphatase non-receptor type 12 OS=Mus musculus OX=10090 GN=Ptpn12 PE=1 SV=3	1	1	1	1	1	0	1	1	0	0	0	1	0	0	1	0	1	1	0	0	0	1	0	0	1	0	1	1	0	0	0	1	0	0	1.7	1.7	1.7	86.525	775	775	1	4
P35922	P35922	21	20	19	Fragile X mental retardation protein 1 homolog	Fmr1	sp|P35922|FMR1_MOUSE Synaptic functional regulator FMR1 OS=Mus musculus OX=10090 GN=Fmr1 PE=1 SV=1	1	21	20	19	13	17	17	12	10	18	19	20	8	19	12	16	16	11	9	17	18	19	7	18	11	15	15	10	8	16	17	18	6	17	40.1	38.8	35.7	68.988	614	614	1	165
P35979	P35979	9	9	9	60S ribosomal protein L12	Rpl12	sp|P35979|RL12_MOUSE 60S ribosomal protein L12 OS=Mus musculus OX=10090 GN=Rpl12 PE=1 SV=2	1	9	9	9	6	8	6	5	5	9	9	9	5	6	6	8	6	5	5	9	9	9	5	6	6	8	6	5	5	9	9	9	5	6	63.6	63.6	63.6	17.804	165	165	1	106
P35980	P35980	9	9	9	60S ribosomal protein L18	Rpl18	sp|P35980|RL18_MOUSE 60S ribosomal protein L18 OS=Mus musculus OX=10090 GN=Rpl18 PE=1 SV=3	1	9	9	9	5	8	6	6	6	8	9	8	6	4	5	8	6	6	6	8	9	8	6	4	5	8	6	6	6	8	9	8	6	4	35.6	35.6	35.6	21.644	188	188	1	74
P37040	P37040	14	14	14	NADPH--cytochrome P450 reductase	Por	sp|P37040|NCPR_MOUSE NADPH--cytochrome P450 reductase OS=Mus musculus OX=10090 GN=Por PE=1 SV=2	1	14	14	14	12	14	12	9	11	3	2	2	2	5	12	14	12	9	11	3	2	2	2	5	12	14	12	9	11	3	2	2	2	5	22.6	22.6	22.6	77.043	678	678	1	82
P37913	P37913	30	30	30	DNA ligase 1	Lig1	sp|P37913|DNLI1_MOUSE DNA ligase 1 OS=Mus musculus OX=10090 GN=Lig1 PE=1 SV=2	1	30	30	30	12	19	18	14	14	26	25	26	8	25	12	19	18	14	14	26	25	26	8	25	12	19	18	14	14	26	25	26	8	25	45.6	45.6	45.6	102.29	916	916	1	208
P38532	P38532	1	1	1	Heat shock factor protein 1	Hsf1	sp|P38532|HSF1_MOUSE Heat shock factor protein 1 OS=Mus musculus OX=10090 GN=Hsf1 PE=1 SV=2	1	1	1	1	1	1	0	1	0	1	0	1	1	1	1	1	0	1	0	1	0	1	1	1	1	1	0	1	0	1	0	1	1	1	2.7	2.7	2.7	57.223	525	525	1	7
P38533	P38533	2	2	2	Heat shock factor protein 2	Hsf2	sp|P38533|HSF2_MOUSE Heat shock factor protein 2 OS=Mus musculus OX=10090 GN=Hsf2 PE=2 SV=2	1	2	2	2	1	2	2	2	1	2	2	2	0	1	1	2	2	2	1	2	2	2	0	1	1	2	2	2	1	2	2	2	0	1	4.3	4.3	4.3	60.224	535	535	1	15
P38647	P38647	41	40	40	Stress-70 protein, mitochondrial	Hspa9	sp|P38647|GRP75_MOUSE Stress-70 protein, mitochondrial OS=Mus musculus OX=10090 GN=Hspa9 PE=1 SV=3	1	41	40	40	36	38	38	37	34	30	32	28	26	30	35	37	37	36	33	29	31	28	25	29	35	37	37	36	33	29	31	28	25	29	62.4	61.4	61.4	73.46	679	679	1	480
P39053	P39053	21	12	11	Dynamin-1	Dnm1	sp|P39053|DYN1_MOUSE Dynamin-1 OS=Mus musculus OX=10090 GN=Dnm1 PE=1 SV=2	1	21	12	11	12	16	12	9	9	17	11	16	2	13	5	8	5	3	4	10	5	9	0	8	5	7	5	3	4	9	5	8	0	8	26.6	17.2	17.2	97.802	867	867	1	57
P39054	P39054	25	25	12	Dynamin-2	Dnm2	sp|P39054|DYN2_MOUSE Dynamin-2 OS=Mus musculus OX=10090 GN=Dnm2 PE=1 SV=2	1	25	25	12	12	17	13	10	8	21	15	15	7	16	12	17	13	10	8	21	15	15	7	16	3	8	5	4	3	11	8	6	5	8	33.8	33.8	19.2	98.144	870	870	1	136
P39447	P39447	67	67	67	Tight junction protein ZO-1	Tjp1	sp|P39447|ZO1_MOUSE Tight junction protein ZO-1 OS=Mus musculus OX=10090 GN=Tjp1 PE=1 SV=2	1	67	67	67	44	52	51	44	45	60	58	58	30	58	44	52	51	44	45	60	58	58	30	58	44	52	51	44	45	60	58	58	30	58	55.2	55.2	55.2	194.74	1745	1745	1	593
P39749;CON__ENSEMBL:ENSBTAP00000007350;CON__P01030	P39749	16;1;1	16;1;1	16;1;1	Flap endonuclease 1	Fen1	sp|P39749|FEN1_MOUSE Flap endonuclease 1 OS=Mus musculus OX=10090 GN=Fen1 PE=1 SV=1	3	16	16	16	6	10	7	8	9	12	11	12	3	13	6	10	7	8	9	12	11	12	3	13	6	10	7	8	9	12	11	12	3	13	36.5	36.5	36.5	42.314	378	378;1742;1741	1	109
P40124	P40124	14	14	13	Adenylyl cyclase-associated protein 1	Cap1	sp|P40124|CAP1_MOUSE Adenylyl cyclase-associated protein 1 OS=Mus musculus OX=10090 GN=Cap1 PE=1 SV=4	1	14	14	13	5	10	8	5	5	10	8	14	5	12	5	10	8	5	5	10	8	14	5	12	4	9	7	4	4	10	7	13	4	12	40.9	40.9	39.2	51.564	474	474	1	103
P40142	P40142	18	18	18	Transketolase	Tkt	sp|P40142|TKT_MOUSE Transketolase OS=Mus musculus OX=10090 GN=Tkt PE=1 SV=1	1	18	18	18	13	9	11	5	10	9	16	10	11	15	13	9	11	5	10	9	16	10	11	15	13	9	11	5	10	9	16	10	11	15	39.6	39.6	39.6	67.63	623	623	1	117
P40240	P40240	2	2	2	CD9 antigen	Cd9	sp|P40240|CD9_MOUSE CD9 antigen OS=Mus musculus OX=10090 GN=Cd9 PE=1 SV=2	1	2	2	2	2	2	2	2	2	2	2	1	1	2	2	2	2	2	2	2	2	1	1	2	2	2	2	2	2	2	2	1	1	2	14.2	14.2	14.2	25.258	226	226	1	18
P40336	P40336	6	6	5	Vacuolar protein sorting-associated protein 26A	Vps26a	sp|P40336|VP26A_MOUSE Vacuolar protein sorting-associated protein 26A OS=Mus musculus OX=10090 GN=Vps26a PE=1 SV=1	1	6	6	5	2	3	3	1	1	5	4	5	3	5	2	3	3	1	1	5	4	5	3	5	2	2	2	1	1	4	3	4	3	4	22	22	19.9	38.113	327	327	1	32
P40630;REV__Q921G6	P40630;REV__Q921G6	2;1	2;1	2;1	Transcription factor A, mitochondrial	Tfam	sp|P40630|TFAM_MOUSE Transcription factor A, mitochondrial OS=Mus musculus OX=10090 GN=Tfam PE=1 SV=2;sp|Q921G6|LRCH4_MOUSE Leucine-rich repeat and calponin homology domain-containing protein 4 OS=Mus musculus OX=10090 GN=Lrch4 PE=1 SV=1	2	2	2	2	1	1	1	1	1	2	2	2	0	1	1	1	1	1	1	2	2	2	0	1	1	1	1	1	1	2	2	2	0	1	7	7	7	27.987	243	243;680	1	12
P40694	P40694	1	1	1	DNA-binding protein SMUBP-2	Ighmbp2	sp|P40694|SMBP2_MOUSE DNA-binding protein SMUBP-2 OS=Mus musculus OX=10090 GN=Ighmbp2 PE=1 SV=1	1	1	1	1	0	0	1	1	1	0	1	0	1	0	0	0	1	1	1	0	1	0	1	0	0	0	1	1	1	0	1	0	1	0	1.1	1.1	1.1	109.46	993	993	1	5
P41105	P41105	6	6	6	60S ribosomal protein L28	Rpl28	sp|P41105|RL28_MOUSE 60S ribosomal protein L28 OS=Mus musculus OX=10090 GN=Rpl28 PE=1 SV=2	1	6	6	6	4	6	4	4	4	5	6	6	4	3	4	6	4	4	4	5	6	6	4	3	4	6	4	4	4	5	6	6	4	3	39.4	39.4	39.4	15.733	137	137	1	50
P41216;Q8JZR0	P41216;Q8JZR0	3;2	3;2	3;2	Long-chain-fatty-acid--CoA ligase 1;Long-chain-fatty-acid--CoA ligase 5	Acsl1;Acsl5	sp|P41216|ACSL1_MOUSE Long-chain-fatty-acid--CoA ligase 1 OS=Mus musculus OX=10090 GN=Acsl1 PE=1 SV=2;sp|Q8JZR0|ACSL5_MOUSE Long-chain-fatty-acid--CoA ligase 5 OS=Mus musculus OX=10090 GN=Acsl5 PE=1 SV=1	2	3	3	3	3	3	2	1	2	2	0	2	0	0	3	3	2	1	2	2	0	2	0	0	3	3	2	1	2	2	0	2	0	0	5.9	5.9	5.9	77.951	699	699;683	1	15
P42125	P42125	1	1	1	Enoyl-CoA delta isomerase 1, mitochondrial	Eci1	sp|P42125|ECI1_MOUSE Enoyl-CoA delta isomerase 1, mitochondrial OS=Mus musculus OX=10090 GN=Eci1 PE=1 SV=2	1	1	1	1	1	1	1	0	1	0	1	0	0	1	1	1	1	0	1	0	1	0	0	1	1	1	1	0	1	0	1	0	0	1	5.2	5.2	5.2	32.25	289	289	1	6
P42128;REV__P83714;O88470;Q5EBP3	P42128	22;1;1;1	22;1;1;1	19;1;0;1	Forkhead box protein K1	Foxk1	sp|P42128|FOXK1_MOUSE Forkhead box protein K1 OS=Mus musculus OX=10090 GN=Foxk1 PE=1 SV=2	4	22	22	19	12	19	17	12	13	19	18	16	1	19	12	19	17	12	13	19	18	16	1	19	12	16	16	11	12	18	16	15	1	18	40.2	40.2	38.1	74.919	719	719;204;375;926	1	159
P42208	P42208	16	16	16	Septin-2	2002-09-01	sp|P42208|SEPT2_MOUSE Septin-2 OS=Mus musculus OX=10090 GN=Septin2 PE=1 SV=2	1	16	16	16	9	12	13	10	10	14	15	13	14	15	9	12	13	10	10	14	15	13	14	15	9	12	13	10	10	14	15	13	14	15	53.5	53.5	53.5	41.525	361	361	1	155
P42209	P42209	1	1	1	Septin-1	2001-09-01	sp|P42209|SEPT1_MOUSE Septin-1 OS=Mus musculus OX=10090 GN=Septin1 PE=1 SV=2	1	1	1	1	0	1	0	0	0	1	1	1	0	1	0	1	0	0	0	1	1	1	0	1	0	1	0	0	0	1	1	1	0	1	3	3	3	42.019	366	366	1	5
P42225	P42225	2	2	2	Signal transducer and activator of transcription 1	Stat1	sp|P42225|STAT1_MOUSE Signal transducer and activator of transcription 1 OS=Mus musculus OX=10090 GN=Stat1 PE=1 SV=1	1	2	2	2	0	0	0	0	0	0	0	1	0	1	0	0	0	0	0	0	0	1	0	1	0	0	0	0	0	0	0	1	0	1	3.3	3.3	3.3	87.196	749	749	1	2
P42227	P42227	6	6	6	Signal transducer and activator of transcription 3	Stat3	sp|P42227|STAT3_MOUSE Signal transducer and activator of transcription 3 OS=Mus musculus OX=10090 GN=Stat3 PE=1 SV=2	1	6	6	6	1	3	2	1	2	4	1	5	0	5	1	3	2	1	2	4	1	5	0	5	1	3	2	1	2	4	1	5	0	5	13.5	13.5	13.5	88.053	770	770	1	24
P42567	P42567	16	16	16	Epidermal growth factor receptor substrate 15	Eps15	sp|P42567|EPS15_MOUSE Epidermal growth factor receptor substrate 15 OS=Mus musculus OX=10090 GN=Eps15 PE=1 SV=1	1	16	16	16	10	9	10	9	7	13	12	12	7	14	10	9	10	9	7	13	12	12	7	14	10	9	10	9	7	13	12	12	7	14	27.1	27.1	27.1	98.47	897	897	1	104
P42582;Q9EQM3;P50220	P42582	3;1;1	3;1;1	3;1;1	Homeobox protein Nkx-2.5	Nkx2-5	sp|P42582|NKX25_MOUSE Homeobox protein Nkx-2.5 OS=Mus musculus OX=10090 GN=Nkx2-5 PE=1 SV=1	3	3	3	3	2	1	2	2	1	2	2	2	0	0	2	1	2	2	1	2	2	2	0	0	2	1	2	2	1	2	2	2	0	0	11.3	11.3	11.3	34.162	318	318;354;372	1	14
P42669	P42669	8	6	6	Transcriptional activator protein Pur-alpha	Pura	sp|P42669|PURA_MOUSE Transcriptional activator protein Pur-alpha OS=Mus musculus OX=10090 GN=Pura PE=1 SV=1	1	8	6	6	3	4	4	3	3	5	5	6	2	8	3	3	4	3	3	4	4	5	2	6	3	3	4	3	3	4	4	5	2	6	29	24.9	24.9	34.883	321	321	1	44
P42932	P42932	41	41	41	T-complex protein 1 subunit theta	Cct8	sp|P42932|TCPQ_MOUSE T-complex protein 1 subunit theta OS=Mus musculus OX=10090 GN=Cct8 PE=1 SV=3	1	41	41	41	27	36	32	32	30	37	34	35	23	38	27	36	32	32	30	37	34	35	23	38	27	36	32	32	30	37	34	35	23	38	77.9	77.9	77.9	59.555	548	548	1	426
P43135;Q60632	P43135	3;1	3;1	3;1	COUP transcription factor 2	Nr2f2	sp|P43135|COT2_MOUSE COUP transcription factor 2 OS=Mus musculus OX=10090 GN=Nr2f2 PE=1 SV=2	2	3	3	3	1	2	0	1	0	2	0	1	0	2	1	2	0	1	0	2	0	1	0	2	1	2	0	1	0	2	0	1	0	2	11.6	11.6	11.6	45.571	414	414;422	1	11
P43247	P43247	26	26	26	DNA mismatch repair protein Msh2	Msh2	sp|P43247|MSH2_MOUSE DNA mismatch repair protein Msh2 OS=Mus musculus OX=10090 GN=Msh2 PE=1 SV=1	1	26	26	26	10	20	16	7	7	19	14	21	4	20	10	20	16	7	7	19	14	21	4	20	10	20	16	7	7	19	14	21	4	20	34.5	34.5	34.5	104.15	935	935	1	146
P43274	P43274	11	5	5	Histone H1.4	Hist1h1e	sp|P43274|H14_MOUSE Histone H1.4 OS=Mus musculus OX=10090 GN=H1-4 PE=1 SV=2	1	11	5	5	7	9	8	7	7	10	6	11	7	9	3	3	4	3	2	4	2	5	3	5	3	3	4	3	2	4	2	5	3	5	27.9	15.5	15.5	21.977	219	219	1	41
P43275	P43275	10	6	6	Histone H1.1	Hist1h1a	sp|P43275|H11_MOUSE Histone H1.1 OS=Mus musculus OX=10090 GN=H1-1 PE=1 SV=2	1	10	6	6	8	8	10	7	8	9	8	9	8	7	6	4	6	5	5	5	5	5	6	4	6	4	6	5	5	5	5	5	6	4	31.9	26.3	26.3	21.785	213	213	1	71
P43276	P43276	8	8	8	Histone H1.5	Hist1h1b	sp|P43276|H15_MOUSE Histone H1.5 OS=Mus musculus OX=10090 GN=H1-5 PE=1 SV=2	1	8	8	8	6	8	7	7	7	7	8	8	4	7	6	8	7	7	7	7	8	8	4	7	6	8	7	7	7	7	8	8	4	7	26.5	26.5	26.5	22.576	223	223	1	76
P43277	P43277	9	1	1	Histone H1.3	Hist1h1d	sp|P43277|H13_MOUSE Histone H1.3 OS=Mus musculus OX=10090 GN=H1-3 PE=1 SV=2	1	9	1	1	6	9	6	6	8	8	7	8	6	6	1	1	0	1	1	1	1	0	1	1	1	1	0	1	1	1	1	0	1	1	25.3	7.2	7.2	22.099	221	221	1	9
P45878	P45878	2	2	2	Peptidyl-prolyl cis-trans isomerase FKBP2	Fkbp2	sp|P45878|FKBP2_MOUSE Peptidyl-prolyl cis-trans isomerase FKBP2 OS=Mus musculus OX=10090 GN=Fkbp2 PE=1 SV=1	1	2	2	2	2	1	2	2	1	2	2	0	1	2	2	1	2	2	1	2	2	0	1	2	2	1	2	2	1	2	2	0	1	2	18.6	18.6	18.6	15.344	140	140	1	15
P46061	P46061	30	30	30	Ran GTPase-activating protein 1	Rangap1	sp|P46061|RAGP1_MOUSE Ran GTPase-activating protein 1 OS=Mus musculus OX=10090 GN=Rangap1 PE=1 SV=2	1	30	30	30	23	25	25	24	22	25	22	24	10	25	23	25	25	24	22	25	22	24	10	25	23	25	25	24	22	25	22	24	10	25	54.3	54.3	54.3	63.53	589	589	1	269
P46414	P46414	2	2	2	Cyclin-dependent kinase inhibitor 1B	Cdkn1b	sp|P46414|CDN1B_MOUSE Cyclin-dependent kinase inhibitor 1B OS=Mus musculus OX=10090 GN=Cdkn1b PE=1 SV=2	1	2	2	2	0	2	2	0	0	2	0	2	0	2	0	2	2	0	0	2	0	2	0	2	0	2	2	0	0	2	0	2	0	2	13.7	13.7	13.7	22.193	197	197	1	10
P46460	P46460	37	37	36	Vesicle-fusing ATPase	Nsf	sp|P46460|NSF_MOUSE Vesicle-fusing ATPase OS=Mus musculus OX=10090 GN=Nsf PE=1 SV=2	1	37	37	36	26	28	33	29	29	32	32	30	18	33	26	28	33	29	29	32	32	30	18	33	26	28	32	29	29	31	31	29	18	32	56.7	56.7	55.8	82.613	744	744	1	317
P46467;Q8VEJ9	P46467	5;2	5;2	4;1	Vacuolar protein sorting-associated protein 4B	Vps4b	sp|P46467|VPS4B_MOUSE Vacuolar protein sorting-associated protein 4B OS=Mus musculus OX=10090 GN=Vps4b PE=1 SV=2	2	5	5	4	0	1	2	0	0	0	0	2	0	4	0	1	2	0	0	0	0	2	0	4	0	0	1	0	0	0	0	1	0	3	16.2	16.2	13.5	49.419	444	444;437	1	9
P46471	P46471	6	6	6	26S protease regulatory subunit 7	Psmc2	sp|P46471|PRS7_MOUSE 26S proteasome regulatory subunit 7 OS=Mus musculus OX=10090 GN=Psmc2 PE=1 SV=5	1	6	6	6	1	3	2	2	1	2	2	4	1	6	1	3	2	2	1	2	2	4	1	6	1	3	2	2	1	2	2	4	1	6	16.2	16.2	16.2	48.647	433	433	1	24
P46638;P62492	P46638;P62492	6;5	6;5	6;5	Ras-related protein Rab-11B;Ras-related protein Rab-11A	Rab11b;Rab11a	sp|P46638|RB11B_MOUSE Ras-related protein Rab-11B OS=Mus musculus OX=10090 GN=Rab11b PE=1 SV=3;sp|P62492|RB11A_MOUSE Ras-related protein Rab-11A OS=Mus musculus OX=10090 GN=Rab11a PE=1 SV=3	2	6	6	6	4	5	6	6	4	6	6	5	4	6	4	5	6	6	4	6	6	5	4	6	4	5	6	6	4	6	6	5	4	6	28.9	28.9	28.9	24.489	218	218;216	1	54
P46660	P46660	8	6	4	Alpha-internexin	Ina	sp|P46660|AINX_MOUSE Alpha-internexin OS=Mus musculus OX=10090 GN=Ina PE=1 SV=3	1	8	6	4	4	3	7	3	6	6	7	5	3	6	2	1	5	1	4	4	5	3	1	4	2	1	3	1	3	4	4	3	1	4	19.8	17.4	13.2	55.382	501	501	1	30
P46718	P46718	1	1	1	Programmed cell death protein 2	Pdcd2	sp|P46718|PDCD2_MOUSE Programmed cell death protein 2 OS=Mus musculus OX=10090 GN=Pdcd2 PE=2 SV=2	1	1	1	1	1	0	0	1	1	1	1	0	1	0	1	0	0	1	1	1	1	0	1	0	1	0	0	1	1	1	1	0	1	0	2.9	2.9	2.9	38.341	343	343	1	6
P46737;Q7M757	P46737	8;1	8;1	8;1	Lys-63-specific deubiquitinase BRCC36	Brcc3	sp|P46737|BRCC3_MOUSE Lys-63-specific deubiquitinase BRCC36 OS=Mus musculus OX=10090 GN=Brcc3 PE=1 SV=1	2	8	8	8	4	6	5	4	5	7	6	8	3	5	4	6	5	4	5	7	6	8	3	5	4	6	5	4	5	7	6	8	3	5	44.7	44.7	44.7	33.34	291	291;291	1	56
P46978	P46978	5	4	4	Dolichyl-diphosphooligosaccharide--protein glycosyltransferase subunit STT3A	Stt3a	sp|P46978|STT3A_MOUSE Dolichyl-diphosphooligosaccharide--protein glycosyltransferase subunit STT3A OS=Mus musculus OX=10090 GN=Stt3a PE=1 SV=1	1	5	4	4	4	4	3	3	4	2	2	0	2	1	3	3	2	2	3	2	2	0	1	1	3	3	2	2	3	2	2	0	1	1	6	5	5	80.597	705	705	1	19
P47738	P47738	6	6	6	Aldehyde dehydrogenase, mitochondrial	Aldh2	sp|P47738|ALDH2_MOUSE Aldehyde dehydrogenase, mitochondrial OS=Mus musculus OX=10090 GN=Aldh2 PE=1 SV=1	1	6	6	6	6	4	4	4	3	2	4	1	4	3	6	4	4	4	3	2	4	1	4	3	6	4	4	4	3	2	4	1	4	3	14.8	14.8	14.8	56.537	519	519	1	41
P47753	P47753	6	4	4	F-actin-capping protein subunit alpha-1	Capza1	sp|P47753|CAZA1_MOUSE F-actin-capping protein subunit alpha-1 OS=Mus musculus OX=10090 GN=Capza1 PE=1 SV=4	1	6	4	4	6	5	5	5	4	5	4	4	5	6	4	3	3	4	3	3	2	2	3	4	4	3	3	4	3	3	2	2	3	4	33.2	23.8	23.8	32.939	286	286	1	31
P47754	P47754	11	11	9	F-actin-capping protein subunit alpha-2	Capza2	sp|P47754|CAZA2_MOUSE F-actin-capping protein subunit alpha-2 OS=Mus musculus OX=10090 GN=Capza2 PE=1 SV=3	1	11	11	9	7	10	9	7	7	11	9	10	7	10	7	10	9	7	7	11	9	10	7	10	5	8	7	6	6	9	7	8	5	8	60.5	60.5	51	32.967	286	286	1	92
P47757	P47757	11	11	11	F-actin-capping protein subunit beta	Capzb	sp|P47757|CAPZB_MOUSE F-actin-capping protein subunit beta OS=Mus musculus OX=10090 GN=Capzb PE=1 SV=3	1	11	11	11	7	7	9	8	10	9	10	10	10	9	7	7	9	8	10	9	10	10	10	9	7	7	9	8	10	9	10	10	10	9	45.8	45.8	45.8	31.345	277	277	1	101
P47758	P47758	5	5	5	Signal recognition particle receptor subunit beta	Srprb	sp|P47758|SRPRB_MOUSE Signal recognition particle receptor subunit beta OS=Mus musculus OX=10090 GN=Srprb PE=1 SV=1	1	5	5	5	5	4	5	4	3	2	1	1	1	1	5	4	5	4	3	2	1	1	1	1	5	4	5	4	3	2	1	1	1	1	21.6	21.6	21.6	29.579	269	269	1	27
P47911	P47911	17	17	17	60S ribosomal protein L6	Rpl6	sp|P47911|RL6_MOUSE 60S ribosomal protein L6 OS=Mus musculus OX=10090 GN=Rpl6 PE=1 SV=3	1	17	17	17	14	13	13	14	12	14	15	12	14	12	14	13	13	14	12	14	15	12	14	12	14	13	13	14	12	14	15	12	14	12	47	47	47	33.509	296	296	1	165
P47915;W4VSN7	P47915;W4VSN7	4;3	4;3	4;3	60S ribosomal protein L29	Rpl29;Gm3550	sp|P47915|RL29_MOUSE 60S ribosomal protein L29 OS=Mus musculus OX=10090 GN=Rpl29 PE=1 SV=2;tr|W4VSN7|W4VSN7_MOUSE 60S ribosomal protein L29 OS=Mus musculus OX=10090 GN=Gm3550 PE=3 SV=1	2	4	4	4	3	3	2	3	2	4	3	4	2	3	3	3	2	3	2	4	3	4	2	3	3	3	2	3	2	4	3	4	2	3	19.4	19.4	19.4	17.587	160	160;160	1	33
P47955;A0A494BA26	P47955	5;1	5;1	5;1	60S acidic ribosomal protein P1	Rplp1	sp|P47955|RLA1_MOUSE 60S acidic ribosomal protein P1 OS=Mus musculus OX=10090 GN=Rplp1 PE=1 SV=1	2	5	5	5	4	4	3	3	3	3	5	4	3	5	4	4	3	3	3	3	5	4	3	5	4	4	3	3	3	3	5	4	3	5	80.7	80.7	80.7	11.475	114	114;113	1	60
P47962	P47962	10	10	10	60S ribosomal protein L5	Rpl5	sp|P47962|RL5_MOUSE 60S ribosomal protein L5 OS=Mus musculus OX=10090 GN=Rpl5 PE=1 SV=3	1	10	10	10	10	10	9	7	8	9	9	8	9	9	10	10	9	7	8	9	9	8	9	9	10	10	9	7	8	9	9	8	9	9	33.7	33.7	33.7	34.4	297	297	1	108
P47963	P47963	9	9	9	60S ribosomal protein L13	Rpl13	sp|P47963|RL13_MOUSE 60S ribosomal protein L13 OS=Mus musculus OX=10090 GN=Rpl13 PE=1 SV=3	1	9	9	9	5	7	8	5	6	7	9	8	5	8	5	7	8	5	6	7	9	8	5	8	5	7	8	5	6	7	9	8	5	8	33.2	33.2	33.2	24.305	211	211	1	76
P47964	P47964	2	2	2	60S ribosomal protein L36	Rpl36	sp|P47964|RL36_MOUSE 60S ribosomal protein L36 OS=Mus musculus OX=10090 GN=Rpl36 PE=1 SV=2	1	2	2	2	0	2	2	1	1	1	1	1	0	1	0	2	2	1	1	1	1	1	0	1	0	2	2	1	1	1	1	1	0	1	18.1	18.1	18.1	12.215	105	105	1	10
P48024	P48024	7	7	2	Eukaryotic translation initiation factor 1	Eif1	sp|P48024|EIF1_MOUSE Eukaryotic translation initiation factor 1 OS=Mus musculus OX=10090 GN=Eif1 PE=1 SV=2	1	7	7	2	1	2	5	5	5	6	5	7	4	6	1	2	5	5	5	6	5	7	4	6	1	1	2	2	2	2	1	2	2	2	76.1	76.1	26.5	12.746	113	113	1	56
P48193	P48193	8	7	6	Protein 4.1	Epb41	sp|P48193|EPB41_MOUSE Protein 4.1 OS=Mus musculus OX=10090 GN=Epb41 PE=1 SV=2	1	8	7	6	5	4	6	3	4	6	4	5	2	5	4	4	5	3	3	5	3	5	2	4	4	4	4	3	3	4	3	5	2	4	12.4	11.1	9.9	95.91	858	858	1	38
P48377	P48377	13	11	10	MHC class II regulatory factor RFX1	Rfx1	sp|P48377|RFX1_MOUSE MHC class II regulatory factor RFX1 OS=Mus musculus OX=10090 GN=Rfx1 PE=1 SV=2	1	13	11	10	7	10	7	6	7	13	11	9	2	8	5	8	5	4	5	11	9	8	1	6	4	8	4	3	4	10	8	7	0	5	20.7	18.2	17	103.71	963	963	1	67
P48381	P48381	13	13	9	Transcription factor RFX3	Rfx3	sp|P48381|RFX3_MOUSE Transcription factor RFX3 OS=Mus musculus OX=10090 GN=Rfx3 PE=1 SV=2	1	13	13	9	6	6	5	7	9	9	7	7	3	8	6	6	5	7	9	9	7	7	3	8	2	3	3	4	5	6	5	5	1	5	31.6	31.6	24.2	83.511	749	749	1	76
P48428	P48428	3	3	3	Tubulin-specific chaperone A	Tbca	sp|P48428|TBCA_MOUSE Tubulin-specific chaperone A OS=Mus musculus OX=10090 GN=Tbca PE=1 SV=3	1	3	3	3	2	1	2	2	2	1	2	1	3	0	2	1	2	2	2	1	2	1	3	0	2	1	2	2	2	1	2	1	3	0	22.2	22.2	22.2	12.758	108	108	1	16
P48678	P48678	52	52	51	Prelamin-A/C;Lamin-A/C	Lmna	sp|P48678|LMNA_MOUSE Prelamin-A/C OS=Mus musculus OX=10090 GN=Lmna PE=1 SV=2	1	52	52	51	39	39	46	43	43	40	40	41	23	40	39	39	46	43	43	40	40	41	23	40	39	39	45	43	43	40	39	40	23	39	67.7	67.7	67.7	74.237	665	665	1	456
P48722	P48722	9	7	7	Heat shock 70 kDa protein 4L	Hspa4l	sp|P48722|HS74L_MOUSE Heat shock 70 kDa protein 4L OS=Mus musculus OX=10090 GN=Hspa4l PE=1 SV=2	1	9	7	7	5	4	5	3	2	6	5	3	2	6	3	3	3	2	1	4	4	2	1	4	3	3	3	2	1	4	4	2	1	4	15.5	11.9	11.9	94.381	838	838	1	27
P48754	P48754	18	18	18	Breast cancer type 1 susceptibility protein homolog	Brca1	sp|P48754|BRCA1_MOUSE Breast cancer type 1 susceptibility protein homolog OS=Mus musculus OX=10090 GN=Brca1 PE=1 SV=3	1	18	18	18	4	7	8	6	7	14	10	12	3	14	4	7	8	6	7	14	10	12	3	14	4	7	8	6	7	14	10	12	3	14	13.4	13.4	13.4	198.79	1812	1812	1	89
P48962;Q3V132	P48962	11;3	4;0	4;0	ADP/ATP translocase 1	Slc25a4	sp|P48962|ADT1_MOUSE ADP/ATP translocase 1 OS=Mus musculus OX=10090 GN=Slc25a4 PE=1 SV=4	2	11	4	4	8	10	7	7	6	2	3	2	3	3	2	4	2	2	2	1	1	1	2	1	2	4	2	2	2	1	1	1	2	1	40.9	11.1	11.1	32.904	298	298;320	1	21
P49025	P49025	3	3	3	Citron Rho-interacting kinase	Cit	sp|P49025|CTRO_MOUSE Citron Rho-interacting kinase OS=Mus musculus OX=10090 GN=Cit PE=1 SV=3	1	3	3	3	2	0	0	1	0	2	2	1	0	2	2	0	0	1	0	2	2	1	0	2	2	0	0	1	0	2	2	1	0	2	2.2	2.2	2.2	235.39	2055	2055	1	10
P49117	P49117	4	4	4	Nuclear receptor subfamily 2 group C member 2	Nr2c2	sp|P49117|NR2C2_MOUSE Nuclear receptor subfamily 2 group C member 2 OS=Mus musculus OX=10090 GN=Nr2c2 PE=1 SV=1	1	4	4	4	1	0	2	1	0	2	1	0	0	2	1	0	2	1	0	2	1	0	0	2	1	0	2	1	0	2	1	0	0	2	8.9	8.9	8.9	65.239	596	596	1	9
P49135	P49135	3	3	3	TFIIH basal transcription factor complex helicase XPB subunit	Ercc3	sp|P49135|ERCC3_MOUSE General transcription and DNA repair factor IIH helicase subunit XPB OS=Mus musculus OX=10090 GN=Ercc3 PE=2 SV=1	1	3	3	3	0	1	1	1	0	1	1	1	0	2	0	1	1	1	0	1	1	1	0	2	0	1	1	1	0	1	1	1	0	2	5.9	5.9	5.9	89.125	783	783	1	8
P49312	P49312	29	29	27	Heterogeneous nuclear ribonucleoprotein A1;Heterogeneous nuclear ribonucleoprotein A1, N-terminally processed	Hnrnpa1	sp|P49312|ROA1_MOUSE Heterogeneous nuclear ribonucleoprotein A1 OS=Mus musculus OX=10090 GN=Hnrnpa1 PE=1 SV=2	1	29	29	27	23	25	23	26	25	24	22	25	21	27	23	25	23	26	25	24	22	25	21	27	22	24	22	25	23	23	21	24	20	25	81.2	81.2	74.7	34.196	320	320	1	1132
P49586;Q811Q9	P49586	10;3	10;3	10;3	Choline-phosphate cytidylyltransferase A	Pcyt1a	sp|P49586|PCY1A_MOUSE Choline-phosphate cytidylyltransferase A OS=Mus musculus OX=10090 GN=Pcyt1a PE=1 SV=1	2	10	10	10	3	3	4	1	0	7	6	9	0	6	3	3	4	1	0	7	6	9	0	6	3	3	4	1	0	7	6	9	0	6	31.1	31.1	31.1	41.666	367	367;369	1	41
P49717	P49717	17	17	17	DNA replication licensing factor MCM4	Mcm4	sp|P49717|MCM4_MOUSE DNA replication licensing factor MCM4 OS=Mus musculus OX=10090 GN=Mcm4 PE=1 SV=1	1	17	17	17	4	10	8	4	1	6	5	10	2	14	4	10	8	4	1	6	5	10	2	14	4	10	8	4	1	6	5	10	2	14	30.2	30.2	30.2	96.735	862	862	1	71
P49718	P49718	8	8	8	DNA replication licensing factor MCM5	Mcm5	sp|P49718|MCM5_MOUSE DNA replication licensing factor MCM5 OS=Mus musculus OX=10090 GN=Mcm5 PE=1 SV=2	1	8	8	8	3	6	4	4	3	5	4	5	0	4	3	6	4	4	3	5	4	5	0	4	3	6	4	4	3	5	4	5	0	4	13.6	13.6	13.6	82.406	734	734	1	38
P49722	P49722	3	3	3	Proteasome subunit alpha type-2	Psma2	sp|P49722|PSA2_MOUSE Proteasome subunit alpha type-2 OS=Mus musculus OX=10090 GN=Psma2 PE=1 SV=3	1	3	3	3	1	0	1	1	2	1	2	1	2	3	1	0	1	1	2	1	2	1	2	3	1	0	1	1	2	1	2	1	2	3	26.5	26.5	26.5	25.926	234	234	1	14
P49962	P49962	6	6	6	Signal recognition particle 9 kDa protein	Srp9	sp|P49962|SRP09_MOUSE Signal recognition particle 9 kDa protein OS=Mus musculus OX=10090 GN=Srp9 PE=1 SV=2	1	6	6	6	4	5	6	6	5	5	6	6	4	5	4	5	6	6	5	5	6	6	4	5	4	5	6	6	5	5	6	6	4	5	45.3	45.3	45.3	10.194	86	86	1	60
P50518	P50518	5	5	5	V-type proton ATPase subunit E 1	Atp6v1e1	sp|P50518|VATE1_MOUSE V-type proton ATPase subunit E 1 OS=Mus musculus OX=10090 GN=Atp6v1e1 PE=1 SV=2	1	5	5	5	1	2	0	1	0	1	0	1	0	4	1	2	0	1	0	1	0	1	0	4	1	2	0	1	0	1	0	1	0	4	30.5	30.5	30.5	26.157	226	226	1	10
P50543	P50543	1	1	1	Protein S100-A11	S100a11	sp|P50543|S10AB_MOUSE Protein S100-A11 OS=Mus musculus OX=10090 GN=S100a11 PE=1 SV=1	1	1	1	1	0	0	0	0	1	0	1	0	0	1	0	0	0	0	1	0	1	0	0	1	0	0	0	0	1	0	1	0	0	1	16.3	16.3	16.3	11.083	98	98	1	3
P50544	P50544	5	5	5	Very long-chain specific acyl-CoA dehydrogenase, mitochondrial	Acadvl	sp|P50544|ACADV_MOUSE Very long-chain specific acyl-CoA dehydrogenase, mitochondrial OS=Mus musculus OX=10090 GN=Acadvl PE=1 SV=3	1	5	5	5	2	4	4	2	3	1	1	3	0	3	2	4	4	2	3	1	1	3	0	3	2	4	4	2	3	1	1	3	0	3	12.2	12.2	12.2	70.875	656	656	1	23
P50580	P50580	23	23	23	Proliferation-associated protein 2G4	Pa2g4	sp|P50580|PA2G4_MOUSE Proliferation-associated protein 2G4 OS=Mus musculus OX=10090 GN=Pa2g4 PE=1 SV=3	1	23	23	23	20	21	21	17	21	21	21	23	17	20	20	21	21	17	21	21	21	23	17	20	20	21	21	17	21	21	21	23	17	20	56.6	56.6	56.6	43.698	394	394	1	315
P51125	P51125	3	3	3	Calpastatin	Cast	sp|P51125|ICAL_MOUSE Calpastatin OS=Mus musculus OX=10090 GN=Cast PE=1 SV=2	1	3	3	3	3	3	3	2	2	1	3	2	2	3	3	3	3	2	2	1	3	2	2	3	3	3	3	2	2	1	3	2	2	3	7.1	7.1	7.1	84.921	788	788	1	24
P51150	P51150	8	8	8	Ras-related protein Rab-7a	Rab7a	sp|P51150|RAB7A_MOUSE Ras-related protein Rab-7a OS=Mus musculus OX=10090 GN=Rab7a PE=1 SV=2	1	8	8	8	7	7	6	6	5	6	5	4	2	2	7	7	6	6	5	6	5	4	2	2	7	7	6	6	5	6	5	4	2	2	48.8	48.8	48.8	23.489	207	207	1	50
P51432	P51432	8	8	8	1-phosphatidylinositol 4,5-bisphosphate phosphodiesterase beta-3	Plcb3	sp|P51432|PLCB3_MOUSE 1-phosphatidylinositol 4,5-bisphosphate phosphodiesterase beta-3 OS=Mus musculus OX=10090 GN=Plcb3 PE=1 SV=2	1	8	8	8	3	6	2	4	4	4	4	5	0	5	3	6	2	4	4	4	4	5	0	5	3	6	2	4	4	4	4	5	0	5	6.4	6.4	6.4	139.49	1234	1234	1	37
P51660	P51660	11	11	11	Peroxisomal multifunctional enzyme type 2;(3R)-hydroxyacyl-CoA dehydrogenase;Enoyl-CoA hydratase 2	Hsd17b4	sp|P51660|DHB4_MOUSE Peroxisomal multifunctional enzyme type 2 OS=Mus musculus OX=10090 GN=Hsd17b4 PE=1 SV=3	1	11	11	11	7	10	11	7	8	2	1	3	1	7	7	10	11	7	8	2	1	3	1	7	7	10	11	7	8	2	1	3	1	7	21.2	21.2	21.2	79.481	735	735	1	62
P51807	P51807	4	4	4	Dynein light chain Tctex-type 1	Dynlt1	sp|P51807|DYLT1_MOUSE Dynein light chain Tctex-type 1 OS=Mus musculus OX=10090 GN=Dynlt1 PE=1 SV=1	1	4	4	4	4	3	3	3	3	3	3	3	1	4	4	3	3	3	3	3	3	3	1	4	4	3	3	3	3	3	3	3	1	4	60.2	60.2	60.2	12.483	113	113	1	46
P51859	P51859	7	6	6	Hepatoma-derived growth factor	Hdgf	sp|P51859|HDGF_MOUSE Hepatoma-derived growth factor OS=Mus musculus OX=10090 GN=Hdgf PE=1 SV=2	1	7	6	6	5	4	6	5	5	5	7	6	7	6	4	3	5	4	4	4	6	5	6	5	4	3	5	4	4	4	6	5	6	5	35	31.6	31.6	26.268	237	237	1	60
P51863	P51863	1	1	1	V-type proton ATPase subunit d 1	Atp6v0d1	sp|P51863|VA0D1_MOUSE V-type proton ATPase subunit d 1 OS=Mus musculus OX=10090 GN=Atp6v0d1 PE=1 SV=2	1	1	1	1	0	1	1	1	1	1	0	1	0	1	0	1	1	1	1	1	0	1	0	1	0	1	1	1	1	1	0	1	0	1	3.7	3.7	3.7	40.301	351	351	1	7
P51881	P51881	11	11	4	ADP/ATP translocase 2;ADP/ATP translocase 2, N-terminally processed	Slc25a5	sp|P51881|ADT2_MOUSE ADP/ATP translocase 2 OS=Mus musculus OX=10090 GN=Slc25a5 PE=1 SV=3	1	11	11	4	10	10	8	8	7	1	2	1	1	2	10	10	8	8	7	1	2	1	1	2	4	4	3	3	3	0	0	0	0	0	43.6	43.6	13.8	32.931	298	298	1	56
P51912	P51912	2	2	2	Neutral amino acid transporter B(0)	Slc1a5	sp|P51912|AAAT_MOUSE Neutral amino acid transporter B(0) OS=Mus musculus OX=10090 GN=Slc1a5 PE=1 SV=2	1	2	2	2	2	2	2	2	1	0	0	0	0	1	2	2	2	2	1	0	0	0	0	1	2	2	2	2	1	0	0	0	0	1	6	6	6	58.482	553	553	1	10
P51943	P51943	4	4	4	Cyclin-A2	Ccna2	sp|P51943|CCNA2_MOUSE Cyclin-A2 OS=Mus musculus OX=10090 GN=Ccna2 PE=1 SV=2	1	4	4	4	1	1	1	1	1	3	2	2	2	4	1	1	1	1	1	3	2	2	2	4	1	1	1	1	1	3	2	2	2	4	17.1	17.1	17.1	47.269	422	422	1	18
P51949	P51949	2	2	2	CDK-activating kinase assembly factor MAT1	Mnat1	sp|P51949|MAT1_MOUSE CDK-activating kinase assembly factor MAT1 OS=Mus musculus OX=10090 GN=Mnat1 PE=1 SV=2	1	2	2	2	1	2	2	1	1	2	2	2	0	2	1	2	2	1	1	2	2	2	0	2	1	2	2	1	1	2	2	2	0	2	13.3	13.3	13.3	35.848	309	309	1	15
P52293	P52293	25	25	24	Importin subunit alpha-1	Kpna2	sp|P52293|IMA1_MOUSE Importin subunit alpha-1 OS=Mus musculus OX=10090 GN=Kpna2 PE=1 SV=2	1	25	25	24	18	16	19	19	18	22	21	21	14	22	18	16	19	19	18	22	21	21	14	22	17	16	18	19	17	21	20	20	14	21	68.6	68.6	67.5	57.927	529	529	1	239
P52432	P52432	10	10	10	DNA-directed RNA polymerases I and III subunit RPAC1	Polr1c	sp|P52432|RPAC1_MOUSE DNA-directed RNA polymerases I and III subunit RPAC1 OS=Mus musculus OX=10090 GN=Polr1c PE=1 SV=3	1	10	10	10	7	6	6	7	3	7	3	7	5	7	7	6	6	7	3	7	3	7	5	7	7	6	6	7	3	7	3	7	5	7	43.6	43.6	43.6	39.106	346	346	1	59
P52479	P52479	18	18	18	Ubiquitin carboxyl-terminal hydrolase 10	Usp10	sp|P52479|UBP10_MOUSE Ubiquitin carboxyl-terminal hydrolase 10 OS=Mus musculus OX=10090 GN=Usp10 PE=1 SV=3	1	18	18	18	7	15	12	10	9	15	16	17	8	15	7	15	12	10	9	15	16	17	8	15	7	15	12	10	9	15	16	17	8	15	34.2	34.2	34.2	87.021	792	792	1	130
P52480	P52480	14	14	14	Pyruvate kinase PKM	Pkm	sp|P52480|KPYM_MOUSE Pyruvate kinase PKM OS=Mus musculus OX=10090 GN=Pkm PE=1 SV=4	1	14	14	14	5	10	8	4	8	8	7	9	5	11	5	10	8	4	8	8	7	9	5	11	5	10	8	4	8	8	7	9	5	11	41.4	41.4	41.4	57.844	531	531	1	81
P52482	P52482	3	3	1	Ubiquitin-conjugating enzyme E2 E1	Ube2e1	sp|P52482|UB2E1_MOUSE Ubiquitin-conjugating enzyme E2 E1 OS=Mus musculus OX=10090 GN=Ube2e1 PE=1 SV=1	1	3	3	1	1	1	1	1	0	1	0	0	0	2	1	1	1	1	0	1	0	0	0	2	0	0	0	0	0	0	0	0	0	1	29	29	9.3	21.333	193	193	1	7
P52633	P52633	2	2	2	Signal transducer and transcription activator 6	Stat6	sp|P52633|STAT6_MOUSE Signal transducer and transcription activator 6 OS=Mus musculus OX=10090 GN=Stat6 PE=1 SV=2	1	2	2	2	0	2	1	0	1	1	2	1	0	1	0	2	1	0	1	1	2	1	0	1	0	2	1	0	1	1	2	1	0	1	2.5	2.5	2.5	93.496	837	837	1	9
P52651	P52651	5	5	5	Homeobox protein Rhox5	Rhox5	sp|P52651|RHOX5_MOUSE Homeobox protein Rhox5 OS=Mus musculus OX=10090 GN=Rhox5 PE=2 SV=1	1	5	5	5	2	2	2	0	2	4	4	4	0	3	2	2	2	0	2	4	4	4	0	3	2	2	2	0	2	4	4	4	0	3	31	31	31	23.045	210	210	1	23
P52875	P52875	1	1	1	Transmembrane protein 165	Tmem165	sp|P52875|TM165_MOUSE Transmembrane protein 165 OS=Mus musculus OX=10090 GN=Tmem165 PE=1 SV=2	1	1	1	1	1	1	1	1	0	0	0	0	0	0	1	1	1	1	0	0	0	0	0	0	1	1	1	1	0	0	0	0	0	0	7.7	7.7	7.7	34.79	323	323	1	4
P52912	P52912	12	8	8	Nucleolysin TIA-1	Tia1	sp|P52912|TIA1_MOUSE Nucleolysin TIA-1 OS=Mus musculus OX=10090 GN=Tia1 PE=1 SV=1	1	12	8	8	6	11	9	6	5	11	9	12	3	9	2	7	5	2	1	7	5	8	1	6	2	7	5	2	1	7	5	8	1	6	44.6	34.5	34.5	42.799	386	386	1	55
P53026	P53026	12	12	12	60S ribosomal protein L10a	Rpl10a	sp|P53026|RL10A_MOUSE 60S ribosomal protein L10a OS=Mus musculus OX=10090 GN=Rpl10a PE=1 SV=3	1	12	12	12	9	11	9	9	10	10	10	11	8	10	9	11	9	9	10	10	10	11	8	10	9	11	9	9	10	10	10	11	8	10	42.9	42.9	42.9	24.916	217	217	1	147
P53395	P53395	1	1	1	Lipoamide acyltransferase component of branched-chain alpha-keto acid dehydrogenase complex, mitochondrial	Dbt	sp|P53395|ODB2_MOUSE Lipoamide acyltransferase component of branched-chain alpha-keto acid dehydrogenase complex, mitochondrial OS=Mus musculus OX=10090 GN=Dbt PE=1 SV=2	1	1	1	1	0	1	1	1	1	0	0	0	0	0	0	1	1	1	1	0	0	0	0	0	0	1	1	1	1	0	0	0	0	0	2.5	2.5	2.5	53.246	482	482	1	4
P53564;P70298	P53564	52;4	52;4	52;4	Homeobox protein cut-like 1	Cux1	sp|P53564|CUX1_MOUSE Homeobox protein cut-like 1 OS=Mus musculus OX=10090 GN=Cux1 PE=1 SV=3	2	52	52	52	34	36	43	34	30	46	43	45	19	45	34	36	43	34	30	46	43	45	19	45	34	36	43	34	30	46	43	45	19	45	46.6	46.6	46.6	165.59	1515	1515;1426	1	400
P53994	P53994	7	7	3	Ras-related protein Rab-2A	Rab2a	sp|P53994|RAB2A_MOUSE Ras-related protein Rab-2A OS=Mus musculus OX=10090 GN=Rab2a PE=1 SV=1	1	7	7	3	6	6	6	5	5	2	2	3	2	6	6	6	6	5	5	2	2	3	2	6	2	3	3	3	2	0	0	0	2	3	41.5	41.5	17.5	23.547	212	212	1	44
P53995	P53995	20	20	20	Anaphase-promoting complex subunit 1	Anapc1	sp|P53995|APC1_MOUSE Anaphase-promoting complex subunit 1 OS=Mus musculus OX=10090 GN=Anapc1 PE=1 SV=2	1	20	20	20	8	11	7	3	2	13	6	15	1	19	8	11	7	3	2	13	6	15	1	19	8	11	7	3	2	13	6	15	1	19	18	18	18	215.99	1944	1944	1	85
P53996	P53996	3	3	3	Cellular nucleic acid-binding protein	Cnbp	sp|P53996|CNBP_MOUSE Cellular nucleic acid-binding protein OS=Mus musculus OX=10090 GN=Cnbp PE=1 SV=2	1	3	3	3	2	3	3	1	3	3	3	3	2	3	2	3	3	1	3	3	3	3	2	3	2	3	3	1	3	3	3	3	2	3	22.5	22.5	22.5	19.592	178	178	1	28
P54071	P54071	2	2	2	Isocitrate dehydrogenase [NADP], mitochondrial	Idh2	sp|P54071|IDHP_MOUSE Isocitrate dehydrogenase [NADP], mitochondrial OS=Mus musculus OX=10090 GN=Idh2 PE=1 SV=3	1	2	2	2	2	2	2	1	2	0	0	0	1	0	2	2	2	1	2	0	0	0	1	0	2	2	2	1	2	0	0	0	1	0	5.3	5.3	5.3	50.906	452	452	1	11
P54103	P54103	14	14	14	DnaJ homolog subfamily C member 2;DnaJ homolog subfamily C member 2, N-terminally processed	Dnajc2	sp|P54103|DNJC2_MOUSE DnaJ homolog subfamily C member 2 OS=Mus musculus OX=10090 GN=Dnajc2 PE=1 SV=2	1	14	14	14	6	11	7	5	6	11	9	13	3	12	6	11	7	5	6	11	9	13	3	12	6	11	7	5	6	11	9	13	3	12	31.4	31.4	31.4	71.721	621	621	1	90
P54227	P54227	3	3	2	Stathmin	Stmn1	sp|P54227|STMN1_MOUSE Stathmin OS=Mus musculus OX=10090 GN=Stmn1 PE=1 SV=2	1	3	3	2	2	1	1	1	1	1	2	1	2	2	2	1	1	1	1	1	2	1	2	2	1	0	0	0	0	0	1	1	1	2	23.5	23.5	17.4	17.274	149	149	1	15
P54276	P54276	15	15	15	DNA mismatch repair protein Msh6	Msh6	sp|P54276|MSH6_MOUSE DNA mismatch repair protein Msh6 OS=Mus musculus OX=10090 GN=Msh6 PE=1 SV=3	1	15	15	15	2	7	7	5	4	9	8	11	2	13	2	7	7	5	4	9	8	11	2	13	2	7	7	5	4	9	8	11	2	13	14.4	14.4	14.4	151.08	1358	1358	1	68
P54310	P54310	1	1	1	Hormone-sensitive lipase	Lipe	sp|P54310|LIPS_MOUSE Hormone-sensitive lipase OS=Mus musculus OX=10090 GN=Lipe PE=1 SV=2	1	1	1	1	0	0	0	0	0	1	1	0	0	1	0	0	0	0	0	1	1	0	0	1	0	0	0	0	0	1	1	0	0	1	2.1	2.1	2.1	83.347	759	759	1	3
P54728;P54726	P54728	9;2	9;2	9;2	UV excision repair protein RAD23 homolog B	Rad23b	sp|P54728|RD23B_MOUSE UV excision repair protein RAD23 homolog B OS=Mus musculus OX=10090 GN=Rad23b PE=1 SV=2	2	9	9	9	3	3	3	3	5	5	8	6	2	5	3	3	3	3	5	5	8	6	2	5	3	3	3	3	5	5	8	6	2	5	29.8	29.8	29.8	43.512	416	416;363	1	47
P54731	P54731	4	4	4	FAS-associated factor 1	Faf1	sp|P54731|FAF1_MOUSE FAS-associated factor 1 OS=Mus musculus OX=10090 GN=Faf1 PE=1 SV=2	1	4	4	4	2	2	2	2	1	3	2	3	0	3	2	2	2	2	1	3	2	3	0	3	2	2	2	2	1	3	2	3	0	3	8	8	8	73.862	649	649	1	20
P54775	P54775	8	8	8	26S protease regulatory subunit 6B	Psmc4	sp|P54775|PRS6B_MOUSE 26S proteasome regulatory subunit 6B OS=Mus musculus OX=10090 GN=Psmc4 PE=1 SV=2	1	8	8	8	1	3	4	2	1	5	2	5	0	8	1	3	4	2	1	5	2	5	0	8	1	3	4	2	1	5	2	5	0	8	28.5	28.5	28.5	47.408	418	418	1	32
P54823	P54823	13	13	13	Probable ATP-dependent RNA helicase DDX6	Ddx6	sp|P54823|DDX6_MOUSE Probable ATP-dependent RNA helicase DDX6 OS=Mus musculus OX=10090 GN=Ddx6 PE=1 SV=1	1	13	13	13	6	10	9	6	8	13	11	10	7	13	6	10	9	6	8	13	11	10	7	13	6	10	9	6	8	13	11	10	7	13	43.5	43.5	43.5	54.191	483	483	1	112
P55096	P55096	4	4	4	ATP-binding cassette sub-family D member 3	Abcd3	sp|P55096|ABCD3_MOUSE ATP-binding cassette sub-family D member 3 OS=Mus musculus OX=10090 GN=Abcd3 PE=1 SV=2	1	4	4	4	1	3	1	1	0	0	0	0	0	0	1	3	1	1	0	0	0	0	0	0	1	3	1	1	0	0	0	0	0	0	9.6	9.6	9.6	75.474	659	659	1	6
P55194	P55194	21	21	21	SH3 domain-binding protein 1	Sh3bp1	sp|P55194|3BP1_MOUSE SH3 domain-binding protein 1 OS=Mus musculus OX=10090 GN=Sh3bp1 PE=1 SV=3	1	21	21	21	10	9	7	8	10	16	15	18	6	20	10	9	7	8	10	16	15	18	6	20	10	9	7	8	10	16	15	18	6	20	35.9	35.9	35.9	74.172	680	680	1	146
P55258;P61028;Q8K386	P55258;P61028;Q8K386	2;1;1	1;0;0	1;0;0	Ras-related protein Rab-8A;Ras-related protein Rab-8B;Ras-related protein Rab-15	Rab8a;Rab8b;Rab15	sp|P55258|RAB8A_MOUSE Ras-related protein Rab-8A OS=Mus musculus OX=10090 GN=Rab8a PE=1 SV=2;sp|P61028|RAB8B_MOUSE Ras-related protein Rab-8B OS=Mus musculus OX=10090 GN=Rab8b PE=1 SV=1;sp|Q8K386|RAB15_MOUSE Ras-related protein Rab-15 OS=Mus musculus OX=10	3	2	1	1	2	2	1	1	1	1	1	1	1	1	1	1	1	0	0	0	0	0	0	0	1	1	1	0	0	0	0	0	0	0	12.1	6.8	6.8	23.668	207	207;207;212	1	3
P55302	P55302	3	3	3	Alpha-2-macroglobulin receptor-associated protein	Lrpap1	sp|P55302|AMRP_MOUSE Alpha-2-macroglobulin receptor-associated protein OS=Mus musculus OX=10090 GN=Lrpap1 PE=1 SV=1	1	3	3	3	2	2	3	2	3	0	1	0	0	0	2	2	3	2	3	0	1	0	0	0	2	2	3	2	3	0	1	0	0	0	9.7	9.7	9.7	42.215	360	360	1	13
P55821	P55821	2	1	1	Stathmin-2	Stmn2	sp|P55821|STMN2_MOUSE Stathmin-2 OS=Mus musculus OX=10090 GN=Stmn2 PE=1 SV=1	1	2	1	1	1	1	1	1	1	1	2	0	1	1	0	0	0	0	0	0	1	0	0	1	0	0	0	0	0	0	1	0	0	1	10.6	5.6	5.6	20.828	179	179	1	2
P55937	P55937	14	14	14	Golgin subfamily A member 3	Golga3	sp|P55937|GOGA3_MOUSE Golgin subfamily A member 3 OS=Mus musculus OX=10090 GN=Golga3 PE=1 SV=3	1	14	14	14	6	10	10	9	7	9	10	13	1	11	6	10	10	9	7	9	10	13	1	11	6	10	10	9	7	9	10	13	1	11	13.7	13.7	13.7	167.22	1487	1487	1	86
P56183	P56183	7	7	7	Ribosomal RNA processing protein 1 homolog A	Rrp1	sp|P56183|RRP1_MOUSE Ribosomal RNA processing protein 1 homolog A OS=Mus musculus OX=10090 GN=Rrp1 PE=1 SV=2	1	7	7	7	5	5	5	5	6	4	4	5	4	4	5	5	5	5	6	4	4	5	4	4	5	5	5	5	6	4	4	5	4	4	20	20	20	54.776	494	494	1	52
P56212;P60840	P56212;P60840	1;1	1;1	1;1	cAMP-regulated phosphoprotein 19;Alpha-endosulfine	Arpp19;Ensa	sp|P56212|ARP19_MOUSE cAMP-regulated phosphoprotein 19 OS=Mus musculus OX=10090 GN=Arpp19 PE=1 SV=2;sp|P60840|ENSA_MOUSE Alpha-endosulfine OS=Mus musculus OX=10090 GN=Ensa PE=1 SV=1	2	1	1	1	1	0	1	0	1	0	1	0	0	0	1	0	1	0	1	0	1	0	0	0	1	0	1	0	1	0	1	0	0	0	9.8	9.8	9.8	12.293	112	112;121	1	4
P56391	P56391	4	4	4	Cytochrome c oxidase subunit 6B1	Cox6b1	sp|P56391|CX6B1_MOUSE Cytochrome c oxidase subunit 6B1 OS=Mus musculus OX=10090 GN=Cox6b1 PE=1 SV=2	1	4	4	4	3	4	3	4	3	0	0	0	0	1	3	4	3	4	3	0	0	0	0	1	3	4	3	4	3	0	0	0	0	1	59.3	59.3	59.3	10.071	86	86	1	18
P56399	P56399	4	4	4	Ubiquitin carboxyl-terminal hydrolase 5	Usp5	sp|P56399|UBP5_MOUSE Ubiquitin carboxyl-terminal hydrolase 5 OS=Mus musculus OX=10090 GN=Usp5 PE=1 SV=1	1	4	4	4	0	0	1	0	0	1	1	2	0	4	0	0	1	0	0	1	1	2	0	4	0	0	1	0	0	1	1	2	0	4	7.7	7.7	7.7	95.832	858	858	1	9
P56480	P56480	22	22	22	ATP synthase subunit beta, mitochondrial	Atp5b	sp|P56480|ATPB_MOUSE ATP synthase subunit beta, mitochondrial OS=Mus musculus OX=10090 GN=Atp5f1b PE=1 SV=2	1	22	22	22	19	21	22	22	21	10	11	14	8	12	19	21	22	22	21	10	11	14	8	12	19	21	22	22	21	10	11	14	8	12	59	59	59	56.3	529	529	1	212
P56546	P56546	13	8	8	C-terminal-binding protein 2	Ctbp2	sp|P56546|CTBP2_MOUSE C-terminal-binding protein 2 OS=Mus musculus OX=10090 GN=Ctbp2 PE=1 SV=2	1	13	8	8	5	9	7	8	4	11	10	10	4	9	1	6	4	4	1	7	6	5	1	8	1	6	4	4	1	7	6	5	1	8	40.7	33	33	48.956	445	445	1	43
P56671	P56671	6	6	5	Myc-associated zinc finger protein	Maz	sp|P56671|MAZ_MOUSE Myc-associated zinc finger protein OS=Mus musculus OX=10090 GN=Maz PE=1 SV=1	1	6	6	5	6	6	6	6	6	6	6	6	2	6	6	6	6	6	6	6	6	6	2	6	5	5	5	5	5	5	5	5	2	5	13.4	13.4	11.9	48.769	477	477	1	61
P56959	P56959	11	11	8	RNA-binding protein FUS	Fus	sp|P56959|FUS_MOUSE RNA-binding protein FUS OS=Mus musculus OX=10090 GN=Fus PE=1 SV=1	1	11	11	8	11	11	11	10	10	11	11	11	8	10	11	11	11	10	10	11	11	11	8	10	8	8	8	8	7	8	8	8	7	7	16.6	16.6	13.7	52.673	518	518	1	152
P56960	P56960	27	27	27	Exosome component 10	Exosc10	sp|P56960|EXOSX_MOUSE Exosome component 10 OS=Mus musculus OX=10090 GN=Exosc10 PE=1 SV=2	1	27	27	27	16	22	18	14	13	22	19	23	6	25	16	22	18	14	13	22	19	23	6	25	16	22	18	14	13	22	19	23	6	25	40	40	40	100.94	887	887	1	192
P57722	P57722	20	20	14	Poly(rC)-binding protein 3	Pcbp3	sp|P57722|PCBP3_MOUSE Poly(rC)-binding protein 3 OS=Mus musculus OX=10090 GN=Pcbp3 PE=1 SV=3	1	20	20	14	19	17	18	15	15	18	17	18	14	18	19	17	18	15	15	18	17	18	14	18	14	11	13	10	10	12	11	12	9	12	86.8	86.8	68.5	39.294	371	371	1	247
P57759	P57759	9	9	9	Endoplasmic reticulum resident protein 29	Erp29	sp|P57759|ERP29_MOUSE Endoplasmic reticulum resident protein 29 OS=Mus musculus OX=10090 GN=Erp29 PE=1 SV=2	1	9	9	9	5	7	6	7	7	7	6	7	2	9	5	7	6	7	7	7	6	7	2	9	5	7	6	7	7	7	6	7	2	9	36.6	36.6	36.6	28.823	262	262	1	66
P57776	P57776	15	15	14	Elongation factor 1-delta	Eef1d	sp|P57776|EF1D_MOUSE Elongation factor 1-delta OS=Mus musculus OX=10090 GN=Eef1d PE=1 SV=3	1	15	15	14	13	13	13	12	14	13	14	14	10	13	13	13	13	12	14	13	14	14	10	13	12	12	12	11	13	12	13	13	9	12	58.7	58.7	58.7	31.293	281	281	1	157
P57780;O88990	P57780	55;10	55;10	33;0	Alpha-actinin-4	Actn4	sp|P57780|ACTN4_MOUSE Alpha-actinin-4 OS=Mus musculus OX=10090 GN=Actn4 PE=1 SV=1	2	55	55	33	31	41	42	36	42	47	47	49	35	54	31	41	42	36	42	47	47	49	35	54	14	23	24	19	23	29	28	29	22	33	71.8	71.8	51.2	104.98	912	912;900	1	578
P57784	P57784	21	21	21	U2 small nuclear ribonucleoprotein A	Snrpa1	sp|P57784|RU2A_MOUSE U2 small nuclear ribonucleoprotein A OS=Mus musculus OX=10090 GN=Snrpa1 PE=1 SV=2	1	21	21	21	15	18	18	17	16	18	18	19	13	21	15	18	18	17	16	18	18	19	13	21	15	18	18	17	16	18	18	19	13	21	75.3	75.3	75.3	28.357	255	255	1	221
P58021	P58021	1	1	1	Transmembrane 9 superfamily member 2	Tm9sf2	sp|P58021|TM9S2_MOUSE Transmembrane 9 superfamily member 2 OS=Mus musculus OX=10090 GN=Tm9sf2 PE=1 SV=1	1	1	1	1	1	1	0	0	0	0	0	1	0	1	1	1	0	0	0	0	0	1	0	1	1	1	0	0	0	0	0	1	0	1	2.1	2.1	2.1	75.329	662	662	1	4
P58252	P58252	45	44	44	Elongation factor 2	Eef2	sp|P58252|EF2_MOUSE Elongation factor 2 OS=Mus musculus OX=10090 GN=Eef2 PE=1 SV=2	1	45	44	44	32	31	39	29	34	34	43	31	38	37	31	30	38	28	33	34	42	30	37	37	31	30	38	28	33	34	42	30	37	37	55.8	54.7	54.7	95.313	858	858	1	429
P58269;Q9QX66;Q8BRB7;Q8BZ21	P58269	8;1;1;1	7;0;0;0	7;0;0;0	Zinc finger protein DPF3	Dpf3	sp|P58269|DPF3_MOUSE Zinc finger protein DPF3 OS=Mus musculus OX=10090 GN=Dpf3 PE=1 SV=2	4	8	7	7	5	6	6	6	6	7	8	8	3	6	4	5	5	5	5	6	7	7	2	5	4	5	5	5	5	6	7	7	2	5	23	21.2	21.2	43.07	378	378;387;1872;2003	1	51
P58281	P58281	10	10	10	Dynamin-like 120 kDa protein, mitochondrial;Dynamin-like 120 kDa protein, form S1	Opa1	sp|P58281|OPA1_MOUSE Dynamin-like 120 kDa protein, mitochondrial OS=Mus musculus OX=10090 GN=Opa1 PE=1 SV=1	1	10	10	10	6	8	7	5	6	6	5	7	3	7	6	8	7	5	6	6	5	7	3	7	6	8	7	5	6	6	5	7	3	7	12.9	12.9	12.9	111.34	960	960	1	62
P58404	P58404	10	7	7	Striatin-4	Strn4	sp|P58404|STRN4_MOUSE Striatin-4 OS=Mus musculus OX=10090 GN=Strn4 PE=1 SV=2	1	10	7	7	6	7	7	5	5	8	7	7	1	8	5	5	6	5	4	6	5	6	0	6	5	5	6	5	4	6	5	6	0	6	14.7	11.6	11.6	81.644	760	760	1	48
P58462	P58462	14	14	14	Forkhead box protein P1	Foxp1	sp|P58462|FOXP1_MOUSE Forkhead box protein P1 OS=Mus musculus OX=10090 GN=Foxp1 PE=1 SV=1	1	14	14	14	12	11	12	12	11	12	11	12	4	10	12	11	12	12	11	12	11	12	4	10	12	11	12	12	11	12	11	12	4	10	33.2	33.2	33.2	78.832	705	705	1	127
P58468	P58468	2	2	2	Protein FAM207A	Fam207a	sp|P58468|F207A_MOUSE Protein FAM207A OS=Mus musculus OX=10090 GN=Fam207a PE=1 SV=1	1	2	2	2	2	2	2	1	1	2	0	2	0	2	2	2	2	1	1	2	0	2	0	2	2	2	2	1	1	2	0	2	0	2	13.2	13.2	13.2	24.814	219	219	1	14
P58501	P58501	11	11	11	PAX3- and PAX7-binding protein 1	Paxbp1	sp|P58501|PAXB1_MOUSE PAX3- and PAX7-binding protein 1 OS=Mus musculus OX=10090 GN=Paxbp1 PE=1 SV=3	1	11	11	11	6	6	7	4	4	9	7	7	1	4	6	6	7	4	4	9	7	7	1	4	6	6	7	4	4	9	7	7	1	4	14.9	14.9	14.9	104.83	919	919	1	55
P58771	P58771	7	4	2	Tropomyosin alpha-1 chain	Tpm1	sp|P58771|TPM1_MOUSE Tropomyosin alpha-1 chain OS=Mus musculus OX=10090 GN=Tpm1 PE=1 SV=1	1	7	4	2	3	4	5	4	6	6	5	5	5	4	1	2	3	1	3	3	2	2	2	1	0	1	1	0	1	1	0	1	2	0	17.3	9.9	4.9	32.68	284	284	1	22
P58854	P58854	2	2	2	Gamma-tubulin complex component 3	Tubgcp3	sp|P58854|GCP3_MOUSE Gamma-tubulin complex component 3 OS=Mus musculus OX=10090 GN=Tubgcp3 PE=1 SV=2	1	2	2	2	1	2	1	0	0	1	1	2	0	1	1	2	1	0	0	1	1	2	0	1	1	2	1	0	0	1	1	2	0	1	2.2	2.2	2.2	103.47	905	905	1	9
P58871	P58871	68	68	68	182 kDa tankyrase-1-binding protein	Tnks1bp1	sp|P58871|TB182_MOUSE 182 kDa tankyrase-1-binding protein OS=Mus musculus OX=10090 GN=Tnks1bp1 PE=1 SV=2	1	68	68	68	34	38	50	47	41	56	56	56	36	58	34	38	50	47	41	56	56	56	36	58	34	38	50	47	41	56	56	56	36	58	57.7	57.7	57.7	181.82	1720	1720	1	514
P59235	P59235	8	8	8	Nucleoporin Nup43	Nup43	sp|P59235|NUP43_MOUSE Nucleoporin Nup43 OS=Mus musculus OX=10090 GN=Nup43 PE=1 SV=2	1	8	8	8	5	7	7	6	5	5	5	4	1	3	5	7	7	6	5	5	5	4	1	3	5	7	7	6	5	5	5	4	1	3	31.6	31.6	31.6	41.989	380	380	1	49
P59267	P59267	1	1	1	Palmitoyltransferase ZDHHC2	Zdhhc2	sp|P59267|ZDHC2_MOUSE Palmitoyltransferase ZDHHC2 OS=Mus musculus OX=10090 GN=Zdhhc2 PE=1 SV=1	1	1	1	1	0	0	0	0	0	0	0	1	0	0	0	0	0	0	0	0	0	1	0	0	0	0	0	0	0	0	0	1	0	0	3.8	3.8	3.8	41.981	366	366	1	1
P59325	P59325	8	8	8	Eukaryotic translation initiation factor 5	Eif5	sp|P59325|IF5_MOUSE Eukaryotic translation initiation factor 5 OS=Mus musculus OX=10090 GN=Eif5 PE=1 SV=1	1	8	8	8	4	6	4	6	4	7	6	7	4	5	4	6	4	6	4	7	6	7	4	5	4	6	4	6	4	7	6	7	4	5	21	21	21	48.968	429	429	1	54
P59326	P59326	8	2	2	YTH domain-containing family protein 1	Ythdf1	sp|P59326|YTHD1_MOUSE YTH domain-containing family protein 1 OS=Mus musculus OX=10090 GN=Ythdf1 PE=1 SV=1	1	8	2	2	3	5	3	3	4	5	4	8	3	7	1	1	1	1	1	1	1	2	0	2	1	1	1	1	1	1	1	2	0	2	20.8	9.1	9.1	60.878	559	559	1	11
P59328	P59328	14	14	14	WD repeat and HMG-box DNA-binding protein 1	Wdhd1	sp|P59328|WDHD1_MOUSE WD repeat and HMG-box DNA-binding protein 1 OS=Mus musculus OX=10090 GN=Wdhd1 PE=1 SV=2	1	14	14	14	3	3	3	3	2	6	5	11	1	12	3	3	3	3	2	6	5	11	1	12	3	3	3	3	2	6	5	11	1	12	19.9	19.9	19.9	124.25	1117	1117	1	49
P59708	P59708	6	6	6	Splicing factor 3B subunit 6	Sf3b6	sp|P59708|SF3B6_MOUSE Splicing factor 3B subunit 6 OS=Mus musculus OX=10090 GN=Sf3b6 PE=1 SV=1	1	6	6	6	6	4	6	6	5	6	6	5	4	5	6	4	6	6	5	6	6	5	4	5	6	4	6	6	5	6	6	5	4	5	53.6	53.6	53.6	14.585	125	125	1	68
P59764	P59764	1	1	1	Dedicator of cytokinesis protein 4	Dock4	sp|P59764|DOCK4_MOUSE Dedicator of cytokinesis protein 4 OS=Mus musculus OX=10090 GN=Dock4 PE=1 SV=1	1	1	1	1	0	0	0	0	0	0	0	0	0	1	0	0	0	0	0	0	0	0	0	1	0	0	0	0	0	0	0	0	0	1	0.7	0.7	0.7	226.55	1978	1978	1	1
P59997	P59997	1	1	1	Lysine-specific demethylase 2A	Kdm2a	sp|P59997|KDM2A_MOUSE Lysine-specific demethylase 2A OS=Mus musculus OX=10090 GN=Kdm2a PE=1 SV=2	1	1	1	1	1	1	1	1	1	1	1	1	1	1	1	1	1	1	1	1	1	1	1	1	1	1	1	1	1	1	1	1	1	1	1.5	1.5	1.5	132.68	1161	1161	1	10
P59999	P59999	4	4	4	Actin-related protein 2/3 complex subunit 4	Arpc4	sp|P59999|ARPC4_MOUSE Actin-related protein 2/3 complex subunit 4 OS=Mus musculus OX=10090 GN=Arpc4 PE=1 SV=3	1	4	4	4	4	4	4	4	4	4	4	4	4	4	4	4	4	4	4	4	4	4	4	4	4	4	4	4	4	4	4	4	4	4	22.6	22.6	22.6	19.667	168	168	1	42
P60060	P60060	2	2	2	Protein transport protein Sec61 subunit gamma	Sec61g	sp|P60060|SC61G_MOUSE Protein transport protein Sec61 subunit gamma OS=Mus musculus OX=10090 GN=Sec61g PE=3 SV=1	1	2	2	2	1	2	2	2	1	1	0	0	0	1	1	2	2	2	1	1	0	0	0	1	1	2	2	2	1	1	0	0	0	1	36.8	36.8	36.8	7.7412	68	68	1	10
P60122	P60122	29	29	29	RuvB-like 1	Ruvbl1	sp|P60122|RUVB1_MOUSE RuvB-like 1 OS=Mus musculus OX=10090 GN=Ruvbl1 PE=1 SV=1	1	29	29	29	19	22	23	21	20	24	24	25	18	24	19	22	23	21	20	24	24	25	18	24	19	22	23	21	20	24	24	25	18	24	70.4	70.4	70.4	50.213	456	456	1	298
P60229	P60229	17	17	17	Eukaryotic translation initiation factor 3 subunit E	Eif3e	sp|P60229|EIF3E_MOUSE Eukaryotic translation initiation factor 3 subunit E OS=Mus musculus OX=10090 GN=Eif3e PE=1 SV=1	1	17	17	17	9	8	10	10	9	13	12	11	8	14	9	8	10	10	9	13	12	11	8	14	9	8	10	10	9	13	12	11	8	14	49	49	49	52.22	445	445	1	137
P60330	P60330	4	4	4	Separin	Espl1	sp|P60330|ESPL1_MOUSE Separin OS=Mus musculus OX=10090 GN=Espl1 PE=1 SV=1	1	4	4	4	1	2	1	1	0	3	2	4	1	2	1	2	1	1	0	3	2	4	1	2	1	2	1	1	0	3	2	4	1	2	2.2	2.2	2.2	233.03	2118	2118	1	17
P60335;P57724	P60335	18;1	14;0	13;0	Poly(rC)-binding protein 1	Pcbp1	sp|P60335|PCBP1_MOUSE Poly(rC)-binding protein 1 OS=Mus musculus OX=10090 GN=Pcbp1 PE=1 SV=1	2	18	14	13	16	17	17	17	17	18	18	18	16	18	13	13	14	14	14	14	14	14	13	14	12	12	13	13	13	13	13	13	12	13	80.9	69.1	69.1	37.497	356	356;403	1	309
P60670	P60670	30	30	30	Nuclear protein localization protein 4 homolog	Nploc4	sp|P60670|NPL4_MOUSE Nuclear protein localization protein 4 homolog OS=Mus musculus OX=10090 GN=Nploc4 PE=1 SV=3	1	30	30	30	19	23	25	19	22	26	24	26	17	24	19	23	25	19	22	26	24	26	17	24	19	23	25	19	22	26	24	26	17	24	63.7	63.7	63.7	68.016	608	608	1	305
P60710;V9GXQ2;E9Q3M9	P60710	33;2;1	1;0;0	1;0;0	Actin, cytoplasmic 1;Actin, cytoplasmic 1, N-terminally processed	Actb	sp|P60710|ACTB_MOUSE Actin, cytoplasmic 1 OS=Mus musculus OX=10090 GN=Actb PE=1 SV=1	3	33	1	1	31	29	32	32	32	30	30	29	28	29	0	0	1	1	1	1	1	1	1	1	0	0	1	1	1	1	1	1	1	1	78.4	4.5	4.5	41.736	375	375;156;1175	1	58
P60762	P60762	10	9	9	Mortality factor 4-like protein 1	Morf4l1	sp|P60762|MO4L1_MOUSE Mortality factor 4-like protein 1 OS=Mus musculus OX=10090 GN=Morf4l1 PE=1 SV=2	1	10	9	9	4	5	4	3	2	7	6	6	4	8	4	5	4	3	2	7	5	5	4	8	4	5	4	3	2	7	5	5	4	8	34.5	30.7	30.7	41.492	362	362	1	47
P60766	P60766	2	1	1	Cell division control protein 42 homolog	Cdc42	sp|P60766|CDC42_MOUSE Cell division control protein 42 homolog OS=Mus musculus OX=10090 GN=Cdc42 PE=1 SV=2	1	2	1	1	1	1	0	0	0	1	1	0	0	1	0	0	0	0	0	1	1	0	0	1	0	0	0	0	0	1	1	0	0	1	14.7	8.9	8.9	21.258	191	191	1	3
P60824	P60824	6	6	6	Cold-inducible RNA-binding protein	Cirbp	sp|P60824|CIRBP_MOUSE Cold-inducible RNA-binding protein OS=Mus musculus OX=10090 GN=Cirbp PE=1 SV=1	1	6	6	6	4	4	4	5	4	5	6	6	3	6	4	4	4	5	4	5	6	6	3	6	4	4	4	5	4	5	6	6	3	6	39.5	39.5	39.5	18.607	172	172	1	58
P60843	P60843	25	22	12	Eukaryotic initiation factor 4A-I	Eif4a1	sp|P60843|IF4A1_MOUSE Eukaryotic initiation factor 4A-I OS=Mus musculus OX=10090 GN=Eif4a1 PE=1 SV=1	1	25	22	12	17	23	24	21	19	24	24	25	17	23	14	20	21	18	16	21	21	22	14	20	8	10	12	10	8	11	11	12	8	10	59.9	54.2	31.8	46.153	406	406	1	229
P60867	P60867	7	7	7	40S ribosomal protein S20	Rps20	sp|P60867|RS20_MOUSE 40S ribosomal protein S20 OS=Mus musculus OX=10090 GN=Rps20 PE=1 SV=1	1	7	7	7	4	6	6	5	6	7	6	7	5	7	4	6	6	5	6	7	6	7	5	7	4	6	6	5	6	7	6	7	5	7	42.9	42.9	42.9	13.373	119	119	1	94
P60898	P60898	4	4	4	DNA-directed RNA polymerase II subunit RPB9	Polr2i	sp|P60898|RPB9_MOUSE DNA-directed RNA polymerase II subunit RPB9 OS=Mus musculus OX=10090 GN=Polr2i PE=1 SV=1	1	4	4	4	4	4	3	3	3	4	4	4	3	3	4	4	3	3	3	4	4	4	3	3	4	4	3	3	3	4	4	4	3	3	47.2	47.2	47.2	14.523	125	125	1	46
P61022	P61022	4	4	4	Calcineurin B homologous protein 1	Chp1	sp|P61022|CHP1_MOUSE Calcineurin B homologous protein 1 OS=Mus musculus OX=10090 GN=Chp1 PE=1 SV=2	1	4	4	4	3	4	4	1	2	1	2	2	1	2	3	4	4	1	2	1	2	2	1	2	3	4	4	1	2	1	2	2	1	2	28.2	28.2	28.2	22.432	195	195	1	22
P61025	P61025	1	1	1	Cyclin-dependent kinases regulatory subunit 1	Cks1b	sp|P61025|CKS1_MOUSE Cyclin-dependent kinases regulatory subunit 1 OS=Mus musculus OX=10090 GN=Cks1b PE=3 SV=1	1	1	1	1	0	1	0	0	0	1	0	1	0	0	0	1	0	0	0	1	0	1	0	0	0	1	0	0	0	1	0	1	0	0	32.9	32.9	32.9	9.6601	79	79	1	3
P61027;Q9DD03	P61027;Q9DD03	4;2	3;1	3;1	Ras-related protein Rab-10;Ras-related protein Rab-13	Rab10;Rab13	sp|P61027|RAB10_MOUSE Ras-related protein Rab-10 OS=Mus musculus OX=10090 GN=Rab10 PE=1 SV=1;sp|Q9DD03|RAB13_MOUSE Ras-related protein Rab-13 OS=Mus musculus OX=10090 GN=Rab13 PE=1 SV=1	2	4	3	3	4	4	3	3	4	3	4	3	3	3	3	3	3	2	3	2	3	2	2	2	3	3	3	2	3	2	3	2	2	2	15	9.5	9.5	22.541	200	200;202	1	25
P61079;P62838;P61080	P61079;P62838;P61080	2;2;1	2;2;1	2;2;1	Ubiquitin-conjugating enzyme E2 D3;Ubiquitin-conjugating enzyme E2 D2;Ubiquitin-conjugating enzyme E2 D1	Ube2d3;Ube2d2;Ube2d1	sp|P61079|UB2D3_MOUSE Ubiquitin-conjugating enzyme E2 D3 OS=Mus musculus OX=10090 GN=Ube2d3 PE=1 SV=1;sp|P62838|UB2D2_MOUSE Ubiquitin-conjugating enzyme E2 D2 OS=Mus musculus OX=10090 GN=Ube2d2 PE=1 SV=1;sp|P61080|UB2D1_MOUSE Ubiquitin-conjugating enzyme E	3	2	2	2	0	1	0	0	0	0	1	1	0	2	0	1	0	0	0	0	1	1	0	2	0	1	0	0	0	0	1	1	0	2	28.6	28.6	28.6	16.687	147	147;147;147	1	6
P61082	P61082	8	8	8	NEDD8-conjugating enzyme Ubc12	Ube2m	sp|P61082|UBC12_MOUSE NEDD8-conjugating enzyme Ubc12 OS=Mus musculus OX=10090 GN=Ube2m PE=1 SV=1	1	8	8	8	6	6	7	5	5	6	7	7	1	7	6	6	7	5	5	6	7	7	1	7	6	6	7	5	5	6	7	7	1	7	30.6	30.6	30.6	20.9	183	183	1	58
P61087	P61087	7	7	7	Ubiquitin-conjugating enzyme E2 K	Ube2k	sp|P61087|UBE2K_MOUSE Ubiquitin-conjugating enzyme E2 K OS=Mus musculus OX=10090 GN=Ube2k PE=1 SV=3	1	7	7	7	2	4	2	1	1	6	2	5	1	3	2	4	2	1	1	6	2	5	1	3	2	4	2	1	1	6	2	5	1	3	37	37	37	22.406	200	200	1	27
P61089	P61089	8	8	7	Ubiquitin-conjugating enzyme E2 N	Ube2n	sp|P61089|UBE2N_MOUSE Ubiquitin-conjugating enzyme E2 N OS=Mus musculus OX=10090 GN=Ube2n PE=1 SV=1	1	8	8	7	4	6	6	5	5	6	6	8	4	8	4	6	6	5	5	6	6	8	4	8	4	5	5	4	4	5	5	7	3	7	53.3	53.3	53.3	17.138	152	152	1	61
P61161	P61161	11	11	11	Actin-related protein 2	Actr2	sp|P61161|ARP2_MOUSE Actin-related protein 2 OS=Mus musculus OX=10090 GN=Actr2 PE=1 SV=1	1	11	11	11	9	11	8	7	8	11	9	8	7	8	9	11	8	7	8	11	9	8	7	8	9	11	8	7	8	11	9	8	7	8	36	36	36	44.76	394	394	1	102
P61164	P61164	17	7	7	Alpha-centractin	Actr1a	sp|P61164|ACTZ_MOUSE Alpha-centractin OS=Mus musculus OX=10090 GN=Actr1a PE=1 SV=1	1	17	7	7	10	14	13	11	13	12	10	12	8	16	2	5	4	4	5	4	3	5	3	7	2	5	4	4	5	4	3	5	3	7	60.4	30.6	30.6	42.613	376	376	1	46
P61202	P61202	20	20	20	COP9 signalosome complex subunit 2	Cops2	sp|P61202|CSN2_MOUSE COP9 signalosome complex subunit 2 OS=Mus musculus OX=10090 GN=Cops2 PE=1 SV=1	1	20	20	20	9	11	11	12	11	17	15	17	8	20	9	11	11	12	11	17	15	17	8	20	9	11	11	12	11	17	15	17	8	20	50.8	50.8	50.8	51.596	443	443	1	153
P61205;P84078;Q8BSL7	P61205;P84078;Q8BSL7	5;5;3	5;5;3	2;2;1	ADP-ribosylation factor 3;ADP-ribosylation factor 1;ADP-ribosylation factor 2	Arf3;Arf1;Arf2	sp|P61205|ARF3_MOUSE ADP-ribosylation factor 3 OS=Mus musculus OX=10090 GN=Arf3 PE=2 SV=2;sp|P84078|ARF1_MOUSE ADP-ribosylation factor 1 OS=Mus musculus OX=10090 GN=Arf1 PE=1 SV=2;sp|Q8BSL7|ARF2_MOUSE ADP-ribosylation factor 2 OS=Mus musculus OX=10090 GN=A	3	5	5	2	2	5	1	2	2	4	3	3	1	4	2	5	1	2	2	4	3	3	1	4	1	2	1	1	1	2	1	1	1	2	35.4	35.4	17.7	20.601	181	181;181;181	1	38
P61216	P61216	1	1	1	Transcription initiation factor TFIID subunit 13	Taf13	sp|P61216|TAF13_MOUSE Transcription initiation factor TFIID subunit 13 OS=Mus musculus OX=10090 GN=Taf13 PE=2 SV=1	1	1	1	1	1	1	1	1	1	1	1	1	1	1	1	1	1	1	1	1	1	1	1	1	1	1	1	1	1	1	1	1	1	1	8.9	8.9	8.9	14.287	124	124	1	10
P61219	P61219	3	3	3	DNA-directed RNA polymerases I, II, and III subunit RPABC2	Polr2f	sp|P61219|RPAB2_MOUSE DNA-directed RNA polymerases I, II, and III subunit RPABC2 OS=Mus musculus OX=10090 GN=Polr2f PE=2 SV=1	1	3	3	3	2	2	1	0	2	1	1	1	1	2	2	2	1	0	2	1	1	1	1	2	2	2	1	0	2	1	1	1	1	2	27.6	27.6	27.6	14.464	127	127	1	13
P61222	P61222	3	3	3	ATP-binding cassette sub-family E member 1	Abce1	sp|P61222|ABCE1_MOUSE ATP-binding cassette sub-family E member 1 OS=Mus musculus OX=10090 GN=Abce1 PE=1 SV=1	1	3	3	3	1	1	1	1	1	1	2	1	0	2	1	1	1	1	1	1	2	1	0	2	1	1	1	1	1	1	2	1	0	2	5.3	5.3	5.3	67.314	599	599	1	17
P61255;A3KGS3	P61255	7;1	7;1	7;1	60S ribosomal protein L26	Rpl26	sp|P61255|RL26_MOUSE 60S ribosomal protein L26 OS=Mus musculus OX=10090 GN=Rpl26 PE=1 SV=1	2	7	7	7	7	6	7	6	7	7	7	6	7	7	7	6	7	6	7	7	7	6	7	7	7	6	7	6	7	7	7	6	7	7	42.8	42.8	42.8	17.258	145	145;1872	1	71
P61290	P61290	5	5	5	Proteasome activator complex subunit 3	Psme3	sp|P61290|PSME3_MOUSE Proteasome activator complex subunit 3 OS=Mus musculus OX=10090 GN=Psme3 PE=1 SV=1	1	5	5	5	3	5	2	2	3	4	4	4	1	3	3	5	2	2	3	4	4	4	1	3	3	5	2	2	3	4	4	4	1	3	21.3	21.3	21.3	29.506	254	254	1	42
P61327;Q9CQL1	P61327;Q9CQL1	13;12	13;12	13;12	Protein mago nashi homolog;Protein mago nashi homolog 2	Magoh;Magohb	sp|P61327|MGN_MOUSE Protein mago nashi homolog OS=Mus musculus OX=10090 GN=Magoh PE=2 SV=1;sp|Q9CQL1|MGN2_MOUSE Protein mago nashi homolog 2 OS=Mus musculus OX=10090 GN=Magohb PE=2 SV=1	2	13	13	13	10	11	11	9	9	11	12	12	10	13	10	11	11	9	9	11	12	12	10	13	10	11	11	9	9	11	12	12	10	13	76	76	76	17.163	146	146;146	1	171
P61358	P61358	10	10	10	60S ribosomal protein L27	Rpl27	sp|P61358|RL27_MOUSE 60S ribosomal protein L27 OS=Mus musculus OX=10090 GN=Rpl27 PE=1 SV=2	1	10	10	10	10	10	10	9	9	10	10	8	8	9	10	10	10	9	9	10	10	8	8	9	10	10	10	9	9	10	10	8	8	9	49.3	49.3	49.3	15.798	136	136	1	174
P61514	P61514	1	1	1	60S ribosomal protein L37a	Rpl37a	sp|P61514|RL37A_MOUSE 60S ribosomal protein L37a OS=Mus musculus OX=10090 GN=Rpl37a PE=1 SV=2	1	1	1	1	1	1	1	1	1	1	1	1	0	1	1	1	1	1	1	1	1	1	0	1	1	1	1	1	1	1	1	1	0	1	19.6	19.6	19.6	10.275	92	92	1	9
P61620;Q9JLR1	P61620	4;1	4;1	4;1	Protein transport protein Sec61 subunit alpha isoform 1	Sec61a1	sp|P61620|S61A1_MOUSE Protein transport protein Sec61 subunit alpha isoform 1 OS=Mus musculus OX=10090 GN=Sec61a1 PE=1 SV=2	2	4	4	4	4	4	4	3	3	0	0	0	0	0	4	4	4	3	3	0	0	0	0	0	4	4	4	3	3	0	0	0	0	0	10.5	10.5	10.5	52.264	476	476;476	1	18
P61759	P61759	7	7	7	Prefoldin subunit 3	Vbp1	sp|P61759|PFD3_MOUSE Prefoldin subunit 3 OS=Mus musculus OX=10090 GN=Vbp1 PE=1 SV=2	1	7	7	7	3	4	5	3	3	5	4	6	2	6	3	4	5	3	3	5	4	6	2	6	3	4	5	3	3	5	4	6	2	6	33.2	33.2	33.2	22.435	196	196	1	41
P61804	P61804	2	2	2	Dolichyl-diphosphooligosaccharide--protein glycosyltransferase subunit DAD1	Dad1	sp|P61804|DAD1_MOUSE Dolichyl-diphosphooligosaccharide--protein glycosyltransferase subunit DAD1 OS=Mus musculus OX=10090 GN=Dad1 PE=1 SV=3	1	2	2	2	2	2	2	2	1	1	1	1	1	0	2	2	2	2	1	1	1	1	1	0	2	2	2	2	1	1	1	1	1	0	19.5	19.5	19.5	12.497	113	113	1	15
P61924	P61924	7	7	7	Coatomer subunit zeta-1	Copz1	sp|P61924|COPZ1_MOUSE Coatomer subunit zeta-1 OS=Mus musculus OX=10090 GN=Copz1 PE=1 SV=1	1	7	7	7	4	5	6	4	4	6	5	6	4	6	4	5	6	4	4	6	5	6	4	6	4	5	6	4	4	6	5	6	4	6	44.1	44.1	44.1	20.198	177	177	1	69
P61957;Q9Z172	P61957;Q9Z172	2;1	2;1	2;1	Small ubiquitin-related modifier 2;Small ubiquitin-related modifier 3	Sumo2;Sumo3	sp|P61957|SUMO2_MOUSE Small ubiquitin-related modifier 2 OS=Mus musculus OX=10090 GN=Sumo2 PE=1 SV=1;sp|Q9Z172|SUMO3_MOUSE Small ubiquitin-related modifier 3 OS=Mus musculus OX=10090 GN=Sumo3 PE=1 SV=1	2	2	2	2	2	2	2	1	1	2	2	2	1	2	2	2	2	1	1	2	2	2	1	2	2	2	2	1	1	2	2	2	1	2	23.2	23.2	23.2	10.871	95	95;110	1	18
P61961	P61961	4	4	4	Ubiquitin-fold modifier 1	Ufm1	sp|P61961|UFM1_MOUSE Ubiquitin-fold modifier 1 OS=Mus musculus OX=10090 GN=Ufm1 PE=1 SV=1	1	4	4	4	2	4	4	3	3	2	4	4	2	4	2	4	4	3	3	2	4	4	2	4	2	4	4	3	3	2	4	4	2	4	58.8	58.8	58.8	9.1175	85	85	1	39
P61963	P61963	1	1	1	DDB1- and CUL4-associated factor 7	Dcaf7	sp|P61963|DCAF7_MOUSE DDB1- and CUL4-associated factor 7 OS=Mus musculus OX=10090 GN=Dcaf7 PE=1 SV=1	1	1	1	1	1	0	1	1	0	1	1	1	0	1	1	0	1	1	0	1	1	1	0	1	1	0	1	1	0	1	1	1	0	1	4.4	4.4	4.4	38.926	342	342	1	7
P61965	P61965	15	15	15	WD repeat-containing protein 5	Wdr5	sp|P61965|WDR5_MOUSE WD repeat-containing protein 5 OS=Mus musculus OX=10090 GN=Wdr5 PE=1 SV=1	1	15	15	15	10	11	10	9	9	13	13	13	10	15	10	11	10	9	9	13	13	13	10	15	10	11	10	9	9	13	13	13	10	15	65.6	65.6	65.6	36.588	334	334	1	133
P61967	P61967	3	3	3	AP-1 complex subunit sigma-1A	Ap1s1	sp|P61967|AP1S1_MOUSE AP-1 complex subunit sigma-1A OS=Mus musculus OX=10090 GN=Ap1s1 PE=1 SV=1	1	3	3	3	1	1	0	1	0	0	1	1	0	3	1	1	0	1	0	0	1	1	0	3	1	1	0	1	0	0	1	1	0	3	22.2	22.2	22.2	18.733	158	158	1	8
P61979	P61979	33	33	33	Heterogeneous nuclear ribonucleoprotein K	Hnrnpk	sp|P61979|HNRPK_MOUSE Heterogeneous nuclear ribonucleoprotein K OS=Mus musculus OX=10090 GN=Hnrnpk PE=1 SV=1	1	33	33	33	26	30	30	27	27	31	32	30	26	32	26	30	30	27	27	31	32	30	26	32	26	30	30	27	27	31	32	30	26	32	69.5	69.5	69.5	50.976	463	463	1	682
P61982;O70456	P61982	15;2	12;0	10;0	14-3-3 protein gamma;14-3-3 protein gamma, N-terminally processed	Ywhag	sp|P61982|1433G_MOUSE 14-3-3 protein gamma OS=Mus musculus OX=10090 GN=Ywhag PE=1 SV=2	2	15	12	10	7	9	10	11	11	11	11	12	10	12	5	6	7	9	9	8	8	9	8	9	3	4	5	7	7	6	6	7	6	7	61.9	53.8	47.4	28.302	247	247;248	1	101
P62075	P62075	6	6	6	Mitochondrial import inner membrane translocase subunit Tim13	Timm13	sp|P62075|TIM13_MOUSE Mitochondrial import inner membrane translocase subunit Tim13 OS=Mus musculus OX=10090 GN=Timm13 PE=1 SV=1	1	6	6	6	4	6	6	6	6	6	6	6	3	6	4	6	6	6	6	6	6	6	3	6	4	6	6	6	6	6	6	6	3	6	77.9	77.9	77.9	10.458	95	95	1	62
P62077	P62077	2	2	2	Mitochondrial import inner membrane translocase subunit Tim8 B	Timm8b	sp|P62077|TIM8B_MOUSE Mitochondrial import inner membrane translocase subunit Tim8 B OS=Mus musculus OX=10090 GN=Timm8b PE=1 SV=1	1	2	2	2	1	0	1	1	0	0	0	0	1	1	1	0	1	1	0	0	0	0	1	1	1	0	1	1	0	0	0	0	1	1	26.5	26.5	26.5	9.2864	83	83	1	5
P62082	P62082	12	12	12	40S ribosomal protein S7	Rps7	sp|P62082|RS7_MOUSE 40S ribosomal protein S7 OS=Mus musculus OX=10090 GN=Rps7 PE=2 SV=1	1	12	12	12	6	7	7	6	9	12	12	11	9	11	6	7	7	6	9	12	12	11	9	11	6	7	7	6	9	12	12	11	9	11	57.2	57.2	57.2	22.127	194	194	1	104
P62137	P62137	21	21	6	Serine/threonine-protein phosphatase PP1-alpha catalytic subunit	Ppp1ca	sp|P62137|PP1A_MOUSE Serine/threonine-protein phosphatase PP1-alpha catalytic subunit OS=Mus musculus OX=10090 GN=Ppp1ca PE=1 SV=1	1	21	21	6	16	19	18	17	18	17	19	19	18	18	16	19	18	17	18	17	19	19	18	18	5	5	5	5	5	5	5	5	6	5	65.8	65.8	19.4	37.54	330	330	1	241
P62141	P62141	20	9	8	Serine/threonine-protein phosphatase PP1-beta catalytic subunit	Ppp1cb	sp|P62141|PP1B_MOUSE Serine/threonine-protein phosphatase PP1-beta catalytic subunit OS=Mus musculus OX=10090 GN=Ppp1cb PE=1 SV=3	1	20	9	8	16	18	18	16	19	19	19	20	16	18	6	7	8	6	8	9	8	9	5	9	5	6	7	5	7	8	7	8	4	8	63.3	34.6	31.2	37.186	327	327	1	99
P62192	P62192	6	6	6	26S protease regulatory subunit 4	Psmc1	sp|P62192|PRS4_MOUSE 26S proteasome regulatory subunit 4 OS=Mus musculus OX=10090 GN=Psmc1 PE=1 SV=1	1	6	6	6	1	3	1	1	1	3	1	5	0	5	1	3	1	1	1	3	1	5	0	5	1	3	1	1	1	3	1	5	0	5	16.8	16.8	16.8	49.184	440	440	1	21
P62196	P62196	7	7	7	26S protease regulatory subunit 8	Psmc5	sp|P62196|PRS8_MOUSE 26S proteasome regulatory subunit 8 OS=Mus musculus OX=10090 GN=Psmc5 PE=1 SV=1	1	7	7	7	0	3	1	1	0	1	0	5	1	7	0	3	1	1	0	1	0	5	1	7	0	3	1	1	0	1	0	5	1	7	21.9	21.9	21.9	45.626	406	406	1	19
P62242	P62242	12	12	12	40S ribosomal protein S8	Rps8	sp|P62242|RS8_MOUSE 40S ribosomal protein S8 OS=Mus musculus OX=10090 GN=Rps8 PE=1 SV=2	1	12	12	12	10	10	11	10	8	11	12	11	7	9	10	10	11	10	8	11	12	11	7	9	10	10	11	10	8	11	12	11	7	9	54.8	54.8	54.8	24.205	208	208	1	123
P62245	P62245	8	8	8	40S ribosomal protein S15a	Rps15a	sp|P62245|RS15A_MOUSE 40S ribosomal protein S15a OS=Mus musculus OX=10090 GN=Rps15a PE=1 SV=2	1	8	8	8	6	6	6	5	4	5	5	5	4	6	6	6	6	5	4	5	5	5	4	6	6	6	6	5	4	5	5	5	4	6	49.2	49.2	49.2	14.839	130	130	1	54
P62259	P62259	15	13	13	14-3-3 protein epsilon	Ywhae	sp|P62259|1433E_MOUSE 14-3-3 protein epsilon OS=Mus musculus OX=10090 GN=Ywhae PE=1 SV=1	1	15	13	13	7	12	12	9	9	14	14	15	9	12	6	10	10	8	8	12	12	13	8	10	6	10	10	8	8	12	12	13	8	10	64.7	57.6	57.6	29.174	255	255	1	125
P62264	P62264	6	6	6	40S ribosomal protein S14	Rps14	sp|P62264|RS14_MOUSE 40S ribosomal protein S14 OS=Mus musculus OX=10090 GN=Rps14 PE=1 SV=3	1	6	6	6	3	4	4	4	3	4	3	4	1	5	3	4	4	4	3	4	3	4	1	5	3	4	4	4	3	4	3	4	1	5	64.9	64.9	64.9	16.273	151	151	1	47
P62267	P62267	2	2	2	40S ribosomal protein S23	Rps23	sp|P62267|RS23_MOUSE 40S ribosomal protein S23 OS=Mus musculus OX=10090 GN=Rps23 PE=1 SV=3	1	2	2	2	2	2	2	1	1	2	1	2	1	2	2	2	2	1	1	2	1	2	1	2	2	2	2	1	1	2	1	2	1	2	15.4	15.4	15.4	15.807	143	143	1	21
P62270;F6YVP7;A0A1Y7VKY1	P62270;F6YVP7;A0A1Y7VKY1	11;10;9	11;10;9	11;10;9	40S ribosomal protein S18	Rps18;Gm10260	sp|P62270|RS18_MOUSE 40S ribosomal protein S18 OS=Mus musculus OX=10090 GN=Rps18 PE=1 SV=3;tr|F6YVP7|F6YVP7_MOUSE 40S ribosomal protein S18 OS=Mus musculus OX=10090 GN=Rps18-ps6 PE=3 SV=2;tr|A0A1Y7VKY1|A0A1Y7VKY1_MOUSE 40S ribosomal protein S18 OS=Mus musc	3	11	11	11	6	6	6	5	5	8	9	9	4	9	6	6	6	5	5	8	9	9	4	9	6	6	6	5	5	8	9	9	4	9	61.2	61.2	61.2	17.718	152	152;152;152	1	78
P62274	P62274	2	2	2	40S ribosomal protein S29	Rps29	sp|P62274|RS29_MOUSE 40S ribosomal protein S29 OS=Mus musculus OX=10090 GN=Rps29 PE=1 SV=2	1	2	2	2	1	1	1	0	0	2	1	2	0	2	1	1	1	0	0	2	1	2	0	2	1	1	1	0	0	2	1	2	0	2	32.1	32.1	32.1	6.6767	56	56	1	13
P62281	P62281	8	8	8	40S ribosomal protein S11	Rps11	sp|P62281|RS11_MOUSE 40S ribosomal protein S11 OS=Mus musculus OX=10090 GN=Rps11 PE=1 SV=3	1	8	8	8	5	7	4	5	4	8	8	7	7	6	5	7	4	5	4	8	8	7	7	6	5	7	4	5	4	8	8	7	7	6	39.2	39.2	39.2	18.431	158	158	1	63
P62301	P62301	6	6	6	40S ribosomal protein S13	Rps13	sp|P62301|RS13_MOUSE 40S ribosomal protein S13 OS=Mus musculus OX=10090 GN=Rps13 PE=1 SV=2	1	6	6	6	5	6	5	5	6	6	6	5	5	4	5	6	5	5	6	6	6	5	5	4	5	6	5	5	6	6	6	5	5	4	42.4	42.4	42.4	17.222	151	151	1	56
P62305	P62305	4	4	4	Small nuclear ribonucleoprotein E	Snrpe	sp|P62305|RUXE_MOUSE Small nuclear ribonucleoprotein E OS=Mus musculus OX=10090 GN=Snrpe PE=1 SV=1	1	4	4	4	1	2	2	1	1	2	3	3	0	4	1	2	2	1	1	2	3	3	0	4	1	2	2	1	1	2	3	3	0	4	65.2	65.2	65.2	10.803	92	92	1	26
P62307	P62307	5	5	5	Small nuclear ribonucleoprotein F	Snrpf	sp|P62307|RUXF_MOUSE Small nuclear ribonucleoprotein F OS=Mus musculus OX=10090 GN=Snrpf PE=1 SV=1	1	5	5	5	3	5	4	5	3	4	5	5	2	5	3	5	4	5	3	4	5	5	2	5	3	5	4	5	3	4	5	5	2	5	33.7	33.7	33.7	9.7251	86	86	1	48
P62309	P62309	2	2	2	Small nuclear ribonucleoprotein G	Snrpg	sp|P62309|RUXG_MOUSE Small nuclear ribonucleoprotein G OS=Mus musculus OX=10090 GN=Snrpg PE=1 SV=1	1	2	2	2	2	1	2	2	2	2	2	2	1	2	2	1	2	2	2	2	2	2	1	2	2	1	2	2	2	2	2	2	1	2	17.1	17.1	17.1	8.496	76	76	1	37
P62311;REV__Q9R0L1	P62311	5;1	5;1	5;1	U6 snRNA-associated Sm-like protein LSm3	Lsm3	sp|P62311|LSM3_MOUSE U6 snRNA-associated Sm-like protein LSm3 OS=Mus musculus OX=10090 GN=Lsm3 PE=1 SV=2	2	5	5	5	4	4	4	4	3	5	4	5	4	5	4	4	4	4	3	5	4	5	4	5	4	4	4	4	3	5	4	5	4	5	28.4	28.4	28.4	11.845	102	102;492	1	49
P62313	P62313	5	5	5	U6 snRNA-associated Sm-like protein LSm6	Lsm6	sp|P62313|LSM6_MOUSE U6 snRNA-associated Sm-like protein LSm6 OS=Mus musculus OX=10090 GN=Lsm6 PE=1 SV=1	1	5	5	5	4	4	4	3	3	2	4	3	3	4	4	4	4	3	3	2	4	3	3	4	4	4	4	3	3	2	4	3	3	4	77.5	77.5	77.5	9.1275	80	80	1	34
P62315	P62315	6	6	6	Small nuclear ribonucleoprotein Sm D1	Snrpd1	sp|P62315|SMD1_MOUSE Small nuclear ribonucleoprotein Sm D1 OS=Mus musculus OX=10090 GN=Snrpd1 PE=1 SV=1	1	6	6	6	5	6	6	4	5	5	6	6	5	6	5	6	6	4	5	5	6	6	5	6	5	6	6	4	5	5	6	6	5	6	56.3	56.3	56.3	13.281	119	119	1	88
P62317	P62317	11	11	11	Small nuclear ribonucleoprotein Sm D2	Snrpd2	sp|P62317|SMD2_MOUSE Small nuclear ribonucleoprotein Sm D2 OS=Mus musculus OX=10090 GN=Snrpd2 PE=1 SV=1	1	11	11	11	8	10	7	8	7	10	10	11	8	11	8	10	7	8	7	10	10	11	8	11	8	10	7	8	7	10	10	11	8	11	74.6	74.6	74.6	13.527	118	118	1	130
P62320	P62320	6	6	6	Small nuclear ribonucleoprotein Sm D3	Snrpd3	sp|P62320|SMD3_MOUSE Small nuclear ribonucleoprotein Sm D3 OS=Mus musculus OX=10090 GN=Snrpd3 PE=1 SV=1	1	6	6	6	6	6	5	4	5	6	6	6	5	6	6	6	5	4	5	6	6	6	5	6	6	6	5	4	5	6	6	6	5	6	54.8	54.8	54.8	13.916	126	126	1	119
P62322	P62322	2	2	2	U6 snRNA-associated Sm-like protein LSm5	Lsm5	sp|P62322|LSM5_MOUSE U6 snRNA-associated Sm-like protein LSm5 OS=Mus musculus OX=10090 GN=Lsm5 PE=3 SV=2	1	2	2	2	1	1	1	2	2	2	1	1	2	2	1	1	1	2	2	2	1	1	2	2	1	1	1	2	2	2	1	1	2	2	46.2	46.2	46.2	9.9374	91	91	1	18
P62331	P62331	1	1	1	ADP-ribosylation factor 6	Arf6	sp|P62331|ARF6_MOUSE ADP-ribosylation factor 6 OS=Mus musculus OX=10090 GN=Arf6 PE=1 SV=2	1	1	1	1	1	1	1	0	0	1	0	1	0	1	1	1	1	0	0	1	0	1	0	1	1	1	1	0	0	1	0	1	0	1	6.3	6.3	6.3	20.082	175	175	1	6
P62334	P62334	6	6	6	26S protease regulatory subunit 10B	Psmc6	sp|P62334|PRS10_MOUSE 26S proteasome regulatory subunit 10B OS=Mus musculus OX=10090 GN=Psmc6 PE=1 SV=1	1	6	6	6	1	3	1	0	0	3	2	3	0	5	1	3	1	0	0	3	2	3	0	5	1	3	1	0	0	3	2	3	0	5	23.7	23.7	23.7	44.172	389	389	1	18
P62482	P62482	4	4	4	Voltage-gated potassium channel subunit beta-2	Kcnab2	sp|P62482|KCAB2_MOUSE Voltage-gated potassium channel subunit beta-2 OS=Mus musculus OX=10090 GN=Kcnab2 PE=1 SV=1	1	4	4	4	2	3	2	0	1	2	3	3	1	4	2	3	2	0	1	2	3	3	1	4	2	3	2	0	1	2	3	3	1	4	16.3	16.3	16.3	41.021	367	367	1	21
P62488	P62488	6	6	6	DNA-directed RNA polymerase II subunit RPB7	Polr2g	sp|P62488|RPB7_MOUSE DNA-directed RNA polymerase II subunit RPB7 OS=Mus musculus OX=10090 GN=Polr2g PE=1 SV=1	1	6	6	6	3	4	3	4	2	2	2	3	2	5	3	4	3	4	2	2	2	3	2	5	3	4	3	4	2	2	2	3	2	5	44.2	44.2	44.2	19.294	172	172	1	31
P62627	P62627	6	6	6	Dynein light chain roadblock-type 1	Dynlrb1	sp|P62627|DLRB1_MOUSE Dynein light chain roadblock-type 1 OS=Mus musculus OX=10090 GN=Dynlrb1 PE=1 SV=3	1	6	6	6	3	4	5	4	3	5	5	5	4	5	3	4	5	4	3	5	5	5	4	5	3	4	5	4	3	5	5	5	4	5	81.2	81.2	81.2	10.99	96	96	1	49
P62702;V9GWY0	P62702;V9GWY0	16;8	16;8	16;8	40S ribosomal protein S4, X isoform;40S ribosomal protein S4	Rps4x;Gm15013	sp|P62702|RS4X_MOUSE 40S ribosomal protein S4, X isoform OS=Mus musculus OX=10090 GN=Rps4x PE=1 SV=2;tr|V9GWY0|V9GWY0_MOUSE 40S ribosomal protein S4 OS=Mus musculus OX=10090 GN=Gm15013 PE=3 SV=1	2	16	16	16	11	14	14	8	10	14	13	14	5	13	11	14	14	8	10	14	13	14	5	13	11	14	14	8	10	14	13	14	5	13	48.7	48.7	48.7	29.597	263	263;266	1	140
P62715	P62715	12	1	1	Serine/threonine-protein phosphatase 2A catalytic subunit beta isoform	Ppp2cb	sp|P62715|PP2AB_MOUSE Serine/threonine-protein phosphatase 2A catalytic subunit beta isoform OS=Mus musculus OX=10090 GN=Ppp2cb PE=1 SV=1	1	12	1	1	7	9	6	6	6	11	10	12	7	12	0	0	0	0	0	1	1	1	0	1	0	0	0	0	0	1	1	1	0	1	51.8	4.2	4.2	35.575	309	309	1	4
P62717	P62717	7	7	7	60S ribosomal protein L18a	Rpl18a	sp|P62717|RL18A_MOUSE 60S ribosomal protein L18a OS=Mus musculus OX=10090 GN=Rpl18a PE=1 SV=1	1	7	7	7	6	7	5	6	5	7	5	6	4	5	6	7	5	6	5	7	5	6	4	5	6	7	5	6	5	7	5	6	4	5	38.6	38.6	38.6	20.732	176	176	1	57
P62743	P62743	4	4	4	AP-2 complex subunit sigma	Ap2s1	sp|P62743|AP2S1_MOUSE AP-2 complex subunit sigma OS=Mus musculus OX=10090 GN=Ap2s1 PE=1 SV=1	1	4	4	4	3	3	2	1	3	4	4	4	1	4	3	3	2	1	3	4	4	4	1	4	3	3	2	1	3	4	4	4	1	4	33.8	33.8	33.8	17.018	142	142	1	38
P62748;P84075;Q91X97	P62748	6;2;1	6;2;1	6;2;1	Hippocalcin-like protein 1	Hpcal1	sp|P62748|HPCL1_MOUSE Hippocalcin-like protein 1 OS=Mus musculus OX=10090 GN=Hpcal1 PE=1 SV=2	3	6	6	6	3	5	3	2	3	4	3	4	2	4	3	5	3	2	3	4	3	4	2	4	3	5	3	2	3	4	3	4	2	4	33.7	33.7	33.7	22.338	193	193;193;193	1	37
P62751	P62751	8	8	8	60S ribosomal protein L23a	Rpl23a	sp|P62751|RL23A_MOUSE 60S ribosomal protein L23a OS=Mus musculus OX=10090 GN=Rpl23a PE=1 SV=1	1	8	8	8	8	8	5	6	6	7	7	8	6	8	8	8	5	6	6	7	7	8	6	8	8	8	5	6	6	7	7	8	6	8	41.7	41.7	41.7	17.695	156	156	1	77
P62754	P62754	3	3	3	40S ribosomal protein S6	Rps6	sp|P62754|RS6_MOUSE 40S ribosomal protein S6 OS=Mus musculus OX=10090 GN=Rps6 PE=1 SV=1	1	3	3	3	1	2	1	1	2	2	1	2	0	1	1	2	1	1	2	2	1	2	0	1	1	2	1	1	2	2	1	2	0	1	12.9	12.9	12.9	28.68	249	249	1	13
P62806	P62806	10	10	10	Histone H4	Hist1h4a	sp|P62806|H4_MOUSE Histone H4 OS=Mus musculus OX=10090 GN=H4f16 PE=1 SV=2	1	10	10	10	9	10	9	9	10	9	9	7	6	7	9	10	9	9	10	9	9	7	6	7	9	10	9	9	10	9	9	7	6	7	62.1	62.1	62.1	11.367	103	103	1	124
Q91YH6;P62814	Q91YH6;P62814	1;1	1;1	1;1	V-type proton ATPase subunit B, brain isoform	Atp6v1b1;Atp6v1b2	tr|Q91YH6|Q91YH6_MOUSE Vacuolar proton pump subunit B OS=Mus musculus OX=10090 GN=Atp6v1b1 PE=1 SV=1;sp|P62814|VATB2_MOUSE V-type proton ATPase subunit B, brain isoform OS=Mus musculus OX=10090 GN=Atp6v1b2 PE=1 SV=1	2	1	1	1	1	1	1	1	1	1	1	1	0	1	1	1	1	1	1	1	1	1	0	1	1	1	1	1	1	1	1	1	0	1	3.9	3.9	3.9	56.79	513	513;511	1	9
P62821	P62821	5	5	2	Ras-related protein Rab-1A	Rab1A	sp|P62821|RAB1A_MOUSE Ras-related protein Rab-1A OS=Mus musculus OX=10090 GN=Rab1A PE=1 SV=3	1	5	5	2	3	4	4	4	2	3	3	3	2	2	3	4	4	4	2	3	3	3	2	2	2	2	2	2	1	2	2	2	1	1	30.2	30.2	18	22.677	205	205	1	31
P62827;Q14AA6;Q61820	P62827;Q14AA6	10;6;4	10;6;4	10;6;4	GTP-binding nuclear protein Ran	Ran;1700009N14Rik	sp|P62827|RAN_MOUSE GTP-binding nuclear protein Ran OS=Mus musculus OX=10090 GN=Ran PE=1 SV=3;tr|Q14AA6|Q14AA6_MOUSE GTP-binding nuclear protein Ran OS=Mus musculus OX=10090 GN=1700009N14Rik PE=1 SV=1	3	10	10	10	8	10	8	10	10	9	10	10	4	10	8	10	8	10	10	9	10	10	4	10	8	10	8	10	10	9	10	10	4	10	48.1	48.1	48.1	24.423	216	216;216;216	1	108
P62830	P62830	7	7	7	60S ribosomal protein L23	Rpl23	sp|P62830|RL23_MOUSE 60S ribosomal protein L23 OS=Mus musculus OX=10090 GN=Rpl23 PE=1 SV=1	1	7	7	7	5	6	5	6	6	6	6	6	1	5	5	6	5	6	6	6	6	6	1	5	5	6	5	6	6	6	6	6	1	5	52.1	52.1	52.1	14.865	140	140	1	63
P62843	P62843	3	3	3	40S ribosomal protein S15	Rps15	sp|P62843|RS15_MOUSE 40S ribosomal protein S15 OS=Mus musculus OX=10090 GN=Rps15 PE=1 SV=2	1	3	3	3	0	1	1	0	0	2	2	2	0	3	0	1	1	0	0	2	2	2	0	3	0	1	1	0	0	2	2	2	0	3	40.7	40.7	40.7	17.04	145	145	1	16
P62849	P62849	4	4	4	40S ribosomal protein S24	Rps24	sp|P62849|RS24_MOUSE 40S ribosomal protein S24 OS=Mus musculus OX=10090 GN=Rps24 PE=1 SV=1	1	4	4	4	2	4	4	1	1	4	4	3	1	3	2	4	4	1	1	4	4	3	1	3	2	4	4	1	1	4	4	3	1	3	34.6	34.6	34.6	15.423	133	133	1	27
P62852	P62852	3	3	3	40S ribosomal protein S25	Rps25	sp|P62852|RS25_MOUSE 40S ribosomal protein S25 OS=Mus musculus OX=10090 GN=Rps25 PE=1 SV=1	1	3	3	3	2	2	2	2	2	2	2	2	2	3	2	2	2	2	2	2	2	2	2	3	2	2	2	2	2	2	2	2	2	3	22.4	22.4	22.4	13.742	125	125	1	22
P62855	P62855	3	3	3	40S ribosomal protein S26	Rps26	sp|P62855|RS26_MOUSE 40S ribosomal protein S26 OS=Mus musculus OX=10090 GN=Rps26 PE=1 SV=3	1	3	3	3	3	3	3	1	2	2	2	2	2	2	3	3	3	1	2	2	2	2	2	2	3	3	3	1	2	2	2	2	2	2	31.3	31.3	31.3	13.015	115	115	1	22
P62858	P62858	6	6	6	40S ribosomal protein S28	Rps28	sp|P62858|RS28_MOUSE 40S ribosomal protein S28 OS=Mus musculus OX=10090 GN=Rps28 PE=1 SV=1	1	6	6	6	4	4	6	6	6	6	6	5	4	6	4	4	6	6	6	6	6	5	4	6	4	4	6	6	6	6	6	5	4	6	56.5	56.5	56.5	7.8409	69	69	1	78
P62869;A6PWE0	P62869	8;1	8;1	8;1	Transcription elongation factor B polypeptide 2	Tceb2	sp|P62869|ELOB_MOUSE Elongin-B OS=Mus musculus OX=10090 GN=Elob PE=1 SV=1	2	8	8	8	5	6	6	8	5	8	7	8	7	7	5	6	6	8	5	8	7	8	7	7	5	6	6	8	5	8	7	8	7	7	80.5	80.5	80.5	13.17	118	118;161	1	76
P62876	P62876	2	2	2	DNA-directed RNA polymerases I, II, and III subunit RPABC5	Polr2l	sp|P62876|RPAB5_MOUSE DNA-directed RNA polymerases I, II, and III subunit RPABC5 OS=Mus musculus OX=10090 GN=Polr2l PE=3 SV=1	1	2	2	2	2	2	2	2	2	2	2	1	2	2	2	2	2	2	2	2	2	1	2	2	2	2	2	2	2	2	2	1	2	2	29.9	29.9	29.9	7.645	67	67	1	19
P62878	P62878	3	3	3	E3 ubiquitin-protein ligase RBX1;E3 ubiquitin-protein ligase RBX1, N-terminally processed	Rbx1	sp|P62878|RBX1_MOUSE E3 ubiquitin-protein ligase RBX1 OS=Mus musculus OX=10090 GN=Rbx1 PE=1 SV=1	1	3	3	3	3	3	3	3	2	3	3	3	1	3	3	3	3	3	2	3	3	3	1	3	3	3	3	3	2	3	3	3	1	3	29.6	29.6	29.6	12.274	108	108	1	27
P62880;P29387	P62880;P29387	6;4	6;4	4;2	Guanine nucleotide-binding protein G(I)/G(S)/G(T) subunit beta-2;Guanine nucleotide-binding protein subunit beta-4	Gnb2;Gnb4	sp|P62880|GBB2_MOUSE Guanine nucleotide-binding protein G(I)/G(S)/G(T) subunit beta-2 OS=Mus musculus OX=10090 GN=Gnb2 PE=1 SV=3;sp|P29387|GBB4_MOUSE Guanine nucleotide-binding protein subunit beta-4 OS=Mus musculus OX=10090 GN=Gnb4 PE=1 SV=4	2	6	6	4	3	4	5	2	2	2	4	4	2	5	3	4	5	2	2	2	4	4	2	5	1	3	3	1	1	1	3	3	1	4	26.5	26.5	20.3	37.331	340	340;340	1	33
P62889	P62889	7	7	7	60S ribosomal protein L30	Rpl30	sp|P62889|RL30_MOUSE 60S ribosomal protein L30 OS=Mus musculus OX=10090 GN=Rpl30 PE=1 SV=2	1	7	7	7	6	7	7	5	6	6	7	6	5	6	6	7	7	5	6	6	7	6	5	6	6	7	7	5	6	6	7	6	5	6	63.5	63.5	63.5	12.784	115	115	1	79
P62892	P62892	1	1	1	60S ribosomal protein L39	Rpl39	sp|P62892|RL39_MOUSE 60S ribosomal protein L39 OS=Mus musculus OX=10090 GN=Rpl39 PE=1 SV=2	1	1	1	1	1	1	1	1	1	1	1	1	0	1	1	1	1	1	1	1	1	1	0	1	1	1	1	1	1	1	1	1	0	1	19.6	19.6	19.6	6.4066	51	51	1	9
P62897	P62897	6	6	3	Cytochrome c, somatic	Cycs	sp|P62897|CYC_MOUSE Cytochrome c, somatic OS=Mus musculus OX=10090 GN=Cycs PE=1 SV=2	1	6	6	3	1	3	3	3	3	3	3	2	4	3	1	3	3	3	3	3	3	2	4	3	0	1	2	1	1	1	2	1	3	1	41.9	41.9	23.8	11.605	105	105	1	29
P62900	P62900	5	5	5	60S ribosomal protein L31	Rpl31	sp|P62900|RL31_MOUSE 60S ribosomal protein L31 OS=Mus musculus OX=10090 GN=Rpl31 PE=1 SV=1	1	5	5	5	4	4	4	3	4	4	4	3	3	5	4	4	4	3	4	4	4	3	3	5	4	4	4	3	4	4	4	3	3	5	37.6	37.6	37.6	14.463	125	125	1	48
P62908	P62908	18	18	18	40S ribosomal protein S3	Rps3	sp|P62908|RS3_MOUSE 40S ribosomal protein S3 OS=Mus musculus OX=10090 GN=Rps3 PE=1 SV=1	1	18	18	18	15	17	16	13	14	15	17	17	13	15	15	17	16	13	14	15	17	17	13	15	15	17	16	13	14	15	17	17	13	15	72.4	72.4	72.4	26.674	243	243	1	190
P62911	P62911	4	4	4	60S ribosomal protein L32	Rpl32	sp|P62911|RL32_MOUSE 60S ribosomal protein L32 OS=Mus musculus OX=10090 GN=Rpl32 PE=1 SV=2	1	4	4	4	3	3	4	3	1	4	2	4	2	4	3	3	4	3	1	4	2	4	2	4	3	3	4	3	1	4	2	4	2	4	34.1	34.1	34.1	15.86	135	135	1	39
P62915	P62915	13	13	13	Transcription initiation factor IIB	Gtf2b	sp|P62915|TF2B_MOUSE Transcription initiation factor IIB OS=Mus musculus OX=10090 GN=Gtf2b PE=1 SV=1	1	13	13	13	7	10	7	3	5	12	7	10	4	11	7	10	7	3	5	12	7	10	4	11	7	10	7	3	5	12	7	10	4	11	51.6	51.6	51.6	34.819	316	316	1	79
P62918	P62918	8	8	8	60S ribosomal protein L8	Rpl8	sp|P62918|RL8_MOUSE 60S ribosomal protein L8 OS=Mus musculus OX=10090 GN=Rpl8 PE=1 SV=2	1	8	8	8	6	7	8	6	5	6	7	8	4	8	6	7	8	6	5	6	7	8	4	8	6	7	8	6	5	6	7	8	4	8	42	42	42	28.024	257	257	1	99
P62960	P62960	19	19	13	Nuclease-sensitive element-binding protein 1	Ybx1	sp|P62960|YBOX1_MOUSE Y-box-binding protein 1 OS=Mus musculus OX=10090 GN=Ybx1 PE=1 SV=3	1	19	19	13	11	11	15	13	13	17	15	18	11	18	11	11	15	13	13	17	15	18	11	18	7	7	11	10	9	13	10	12	7	12	62.1	62.1	47.5	35.73	322	322	1	250
P62962;CON__P02584	P62962;CON__P02584	5;3	5;3	5;3	Profilin-1	Pfn1	sp|P62962|PROF1_MOUSE Profilin-1 OS=Mus musculus OX=10090 GN=Pfn1 PE=1 SV=2;	2	5	5	5	2	1	1	0	0	1	2	1	0	4	2	1	1	0	0	1	2	1	0	4	2	1	1	0	0	1	2	1	0	4	44.3	44.3	44.3	14.957	140	140;140	1	12
P62983;A0A0A6YW67;P62984;P0CG49;P0CG50	P62983;A0A0A6YW67;P62984;P0CG49;P0CG50	10;7;7;7;7	10;7;7;7;7	10;7;7;7;7	Ubiquitin-40S ribosomal protein S27a;Ubiquitin;40S ribosomal protein S27a;Ubiquitin-60S ribosomal protein L40;Ubiquitin;60S ribosomal protein L40;Polyubiquitin-B;Ubiquitin;Polyubiquitin-C;Ubiquitin;Ubiquitin-related 1;Ubiquitin-related 2	Rps27a;Gm8797;Uba52;Ubb;Ubc	sp|P62983|RS27A_MOUSE Ubiquitin-40S ribosomal protein S27a OS=Mus musculus OX=10090 GN=Rps27a PE=1 SV=2;tr|A0A0A6YW67|A0A0A6YW67_MOUSE Predicted pseudogene 8797 OS=Mus musculus OX=10090 GN=Gm8797 PE=4 SV=1;sp|P62984|RL40_MOUSE Ubiquitin-60S ribosomal prote	5	10	10	10	7	8	7	7	6	8	9	8	5	9	7	8	7	7	6	8	9	8	5	9	7	8	7	7	6	8	9	8	5	9	56.4	56.4	56.4	17.951	156	156;77;128;305;734	1	119
P62996	P62996	20	20	16	Transformer-2 protein homolog beta	Tra2b	sp|P62996|TRA2B_MOUSE Transformer-2 protein homolog beta OS=Mus musculus OX=10090 GN=Tra2b PE=1 SV=1	1	20	20	16	16	18	15	16	16	18	15	17	15	18	16	18	15	16	16	18	15	17	15	18	12	15	12	13	13	14	13	14	12	14	51.4	51.4	48.3	33.665	288	288	1	227
P63001;P60764;Q05144;P84096;Q8R527;Q9ER71	P63001;P60764	5;3;2;1;1;1	5;3;2;1;1;1	4;2;1;0;0;0	Ras-related C3 botulinum toxin substrate 1;Ras-related C3 botulinum toxin substrate 3	Rac1;Rac3	sp|P63001|RAC1_MOUSE Ras-related C3 botulinum toxin substrate 1 OS=Mus musculus OX=10090 GN=Rac1 PE=1 SV=1;sp|P60764|RAC3_MOUSE Ras-related C3 botulinum toxin substrate 3 OS=Mus musculus OX=10090 GN=Rac3 PE=1 SV=1	6	5	5	4	5	5	3	3	1	4	1	3	1	1	5	5	3	3	1	4	1	3	1	1	4	4	3	3	1	4	1	3	1	1	30.2	30.2	24.5	21.45	192	192;192;192;191;205;214	1	27
P63005	P63005	6	6	6	Platelet-activating factor acetylhydrolase IB subunit alpha	Pafah1b1	sp|P63005|LIS1_MOUSE Platelet-activating factor acetylhydrolase IB subunit beta OS=Mus musculus OX=10090 GN=Pafah1b1 PE=1 SV=2	1	6	6	6	5	4	4	5	5	2	3	4	3	5	5	4	4	5	5	2	3	4	3	5	5	4	4	5	5	2	3	4	3	5	16.3	16.3	16.3	46.67	410	410	1	40
P63017	P63017	52	52	32	Heat shock cognate 71 kDa protein	Hspa8	sp|P63017|HSP7C_MOUSE Heat shock cognate 71 kDa protein OS=Mus musculus OX=10090 GN=Hspa8 PE=1 SV=1	1	52	52	32	40	42	46	45	42	49	46	47	42	39	40	42	46	45	42	49	46	47	42	39	24	27	28	28	26	29	28	29	27	22	72.4	72.4	55.6	70.87	646	646	1	964
P63024;P63044	P63024;P63044	2;1	2;1	2;1	Vesicle-associated membrane protein 3;Vesicle-associated membrane protein 2	Vamp3;Vamp2	sp|P63024|VAMP3_MOUSE Vesicle-associated membrane protein 3 OS=Mus musculus OX=10090 GN=Vamp3 PE=1 SV=1;sp|P63044|VAMP2_MOUSE Vesicle-associated membrane protein 2 OS=Mus musculus OX=10090 GN=Vamp2 PE=1 SV=2	2	2	2	2	0	2	0	0	0	0	0	0	0	1	0	2	0	0	0	0	0	0	0	1	0	2	0	0	0	0	0	0	0	1	38.8	38.8	38.8	11.48	103	103;116	1	3
P63028	P63028	4	4	4	Translationally-controlled tumor protein	Tpt1	sp|P63028|TCTP_MOUSE Translationally-controlled tumor protein OS=Mus musculus OX=10090 GN=Tpt1 PE=1 SV=1	1	4	4	4	2	2	2	0	2	2	4	3	2	2	2	2	2	0	2	2	4	3	2	2	2	2	2	0	2	2	4	3	2	2	23.3	23.3	23.3	19.462	172	172	1	28
P63037	P63037	16	16	15	DnaJ homolog subfamily A member 1	Dnaja1	sp|P63037|DNJA1_MOUSE DnaJ homolog subfamily A member 1 OS=Mus musculus OX=10090 GN=Dnaja1 PE=1 SV=1	1	16	16	15	6	9	8	7	6	13	10	12	5	15	6	9	8	7	6	13	10	12	5	15	5	8	7	6	5	12	9	11	4	15	58.9	58.9	57.4	44.868	397	397	1	132
P63038	P63038	60	60	60	60 kDa heat shock protein, mitochondrial	Hspd1	sp|P63038|CH60_MOUSE 60 kDa heat shock protein, mitochondrial OS=Mus musculus OX=10090 GN=Hspd1 PE=1 SV=1	1	60	60	60	46	52	55	53	54	49	48	47	43	44	46	52	55	53	54	49	48	47	43	44	46	52	55	53	54	49	48	47	43	44	81.2	81.2	81.2	60.955	573	573	1	980
P63073	P63073	6	6	6	Eukaryotic translation initiation factor 4E	Eif4e	sp|P63073|IF4E_MOUSE Eukaryotic translation initiation factor 4E OS=Mus musculus OX=10090 GN=Eif4e PE=1 SV=1	1	6	6	6	6	6	5	3	3	6	6	6	3	6	6	6	5	3	3	6	6	6	3	6	6	6	5	3	3	6	6	6	3	6	28.6	28.6	28.6	25.053	217	217	1	56
P63085	P63085	6	6	6	Mitogen-activated protein kinase 1	Mapk1	sp|P63085|MK01_MOUSE Mitogen-activated protein kinase 1 OS=Mus musculus OX=10090 GN=Mapk1 PE=1 SV=3	1	6	6	6	0	1	1	0	2	3	3	4	0	5	0	1	1	0	2	3	3	4	0	5	0	1	1	0	2	3	3	4	0	5	27.4	27.4	27.4	41.275	358	358	1	19
P63087	P63087	18	2	2	Serine/threonine-protein phosphatase PP1-gamma catalytic subunit	Ppp1cc	sp|P63087|PP1G_MOUSE Serine/threonine-protein phosphatase PP1-gamma catalytic subunit OS=Mus musculus OX=10090 GN=Ppp1cc PE=1 SV=1	1	18	2	2	14	17	16	15	16	15	17	17	15	16	2	2	2	2	2	2	2	2	2	2	2	2	2	2	2	2	2	2	2	2	56.7	5.9	5.9	36.983	323	323	1	26
P63101	P63101	17	17	14	14-3-3 protein zeta/delta	Ywhaz	sp|P63101|1433Z_MOUSE 14-3-3 protein zeta/delta OS=Mus musculus OX=10090 GN=Ywhaz PE=1 SV=1	1	17	17	14	8	11	13	12	14	17	14	17	10	16	8	11	13	12	14	17	14	17	10	16	6	8	10	10	12	14	11	14	9	13	59.2	59.2	51.4	27.771	245	245	1	184
P63139	P63139	3	3	3	Nuclear transcription factor Y subunit beta	Nfyb	sp|P63139|NFYB_MOUSE Nuclear transcription factor Y subunit beta OS=Mus musculus OX=10090 GN=Nfyb PE=1 SV=1	1	3	3	3	1	2	1	1	1	0	0	1	0	2	1	2	1	1	1	0	0	1	0	2	1	2	1	1	1	0	0	1	0	2	18.4	18.4	18.4	22.787	207	207	1	13
P63154	P63154	20	20	20	Crooked neck-like protein 1	Crnkl1	sp|P63154|CRNL1_MOUSE Crooked neck-like protein 1 OS=Mus musculus OX=10090 GN=Crnkl1 PE=1 SV=1	1	20	20	20	7	9	11	5	8	12	12	15	5	16	7	9	11	5	8	12	12	15	5	16	7	9	11	5	8	12	12	15	5	16	27	27	27	83.415	690	690	1	100
P63158	P63158	13	13	9	High mobility group protein B1	Hmgb1	sp|P63158|HMGB1_MOUSE High mobility group protein B1 OS=Mus musculus OX=10090 GN=Hmgb1 PE=1 SV=2	1	13	13	9	11	8	11	12	11	6	12	7	12	7	11	8	11	12	11	6	12	7	12	7	7	5	8	9	8	4	8	5	9	5	49.8	49.8	38.1	24.893	215	215	1	159
P63166	P63166	2	2	2	Small ubiquitin-related modifier 1	Sumo1	sp|P63166|SUMO1_MOUSE Small ubiquitin-related modifier 1 OS=Mus musculus OX=10090 GN=Sumo1 PE=1 SV=1	1	2	2	2	0	2	2	2	2	2	2	2	1	1	0	2	2	2	2	2	2	2	1	1	0	2	2	2	2	2	2	2	1	1	15.8	15.8	15.8	11.557	101	101	1	16
P63168;Q80ZS7	P63168;Q80ZS7	6;3	6;3	3;1	Dynein light chain 1, cytoplasmic	Dynll1;BC048507	sp|P63168|DYL1_MOUSE Dynein light chain 1, cytoplasmic OS=Mus musculus OX=10090 GN=Dynll1 PE=1 SV=1;tr|Q80ZS7|Q80ZS7_MOUSE Dynein light chain OS=Mus musculus OX=10090 GN=BC048507 PE=1 SV=1	2	6	6	3	5	5	5	5	5	6	6	6	5	5	5	5	5	5	5	6	6	6	5	5	2	2	2	2	2	3	3	3	3	2	64	64	38.2	10.366	89	89;89	1	75
P63242;Q8BGY2	P63242	9;4	9;4	9;4	Eukaryotic translation initiation factor 5A-1	Eif5a	sp|P63242|IF5A1_MOUSE Eukaryotic translation initiation factor 5A-1 OS=Mus musculus OX=10090 GN=Eif5a PE=1 SV=2	2	9	9	9	6	6	7	7	7	6	7	8	6	9	6	6	7	7	7	6	7	8	6	9	6	6	7	7	7	6	7	8	6	9	68.8	68.8	68.8	16.832	154	154;153	1	101
P63260	P63260	34	34	2	Actin, cytoplasmic 2;Actin, cytoplasmic 2, N-terminally processed	Actg1	sp|P63260|ACTG_MOUSE Actin, cytoplasmic 2 OS=Mus musculus OX=10090 GN=Actg1 PE=1 SV=1	1	34	34	2	32	30	32	32	32	31	30	29	28	30	32	30	32	32	32	31	30	29	28	30	1	1	1	1	1	2	1	1	1	2	78.7	78.7	4.8	41.792	375	375	1	1194
Q9Z199;P63271	Q9Z199;P63271	2;2	2;2	2;2	Transcription elongation factor SPT4-B;Transcription elongation factor SPT4-A	Supt4h1b;Supt4h1a	sp|Q9Z199|SPT4B_MOUSE Transcription elongation factor SPT4-B OS=Mus musculus OX=10090 GN=Supt4h1b PE=2 SV=1;sp|P63271|SPT4A_MOUSE Transcription elongation factor SPT4-A OS=Mus musculus OX=10090 GN=Supt4h1a PE=2 SV=1	2	2	2	2	1	2	2	1	2	2	1	2	0	2	1	2	2	1	2	2	1	2	0	2	1	2	2	1	2	2	1	2	0	2	15.4	15.4	15.4	13.194	117	117;117	1	15
P63276	P63276	4	4	4	40S ribosomal protein S17	Rps17	sp|P63276|RS17_MOUSE 40S ribosomal protein S17 OS=Mus musculus OX=10090 GN=Rps17 PE=1 SV=2	1	4	4	4	4	4	4	3	3	4	4	4	2	4	4	4	4	3	3	4	4	4	2	4	4	4	4	3	3	4	4	4	2	4	39.3	39.3	39.3	15.524	135	135	1	58
P63280	P63280	6	6	6	SUMO-conjugating enzyme UBC9	Ube2i	sp|P63280|UBC9_MOUSE SUMO-conjugating enzyme UBC9 OS=Mus musculus OX=10090 GN=Ube2i PE=1 SV=1	1	6	6	6	4	3	4	2	2	4	5	4	1	4	4	3	4	2	2	4	5	4	1	4	4	3	4	2	2	4	5	4	1	4	46.8	46.8	46.8	18.007	158	158	1	43
P63323	P63323	7	7	7	40S ribosomal protein S12	Rps12	sp|P63323|RS12_MOUSE 40S ribosomal protein S12 OS=Mus musculus OX=10090 GN=Rps12 PE=1 SV=2	1	7	7	7	7	5	7	7	6	6	7	7	5	7	7	5	7	7	6	6	7	7	5	7	7	5	7	7	6	6	7	7	5	7	59.1	59.1	59.1	14.525	132	132	1	164
P63325	P63325	7	7	7	40S ribosomal protein S10	Rps10	sp|P63325|RS10_MOUSE 40S ribosomal protein S10 OS=Mus musculus OX=10090 GN=Rps10 PE=1 SV=1	1	7	7	7	4	4	4	4	5	5	5	5	5	6	4	4	4	4	5	5	5	5	5	6	4	4	4	4	5	5	5	5	5	6	38.8	38.8	38.8	18.916	165	165	1	57
P63328;P48453	P63328	6;2	6;2	5;2	Serine/threonine-protein phosphatase 2B catalytic subunit alpha isoform	Ppp3ca	sp|P63328|PP2BA_MOUSE Serine/threonine-protein phosphatase 2B catalytic subunit alpha isoform OS=Mus musculus OX=10090 GN=Ppp3ca PE=1 SV=1	2	6	6	5	2	1	0	0	1	2	1	2	0	4	2	1	0	0	1	2	1	2	0	4	2	1	0	0	1	2	1	2	0	3	15	15	13.8	58.643	521	521;525	1	13
P63330	P63330	12	12	1	Serine/threonine-protein phosphatase 2A catalytic subunit alpha isoform	Ppp2ca	sp|P63330|PP2AA_MOUSE Serine/threonine-protein phosphatase 2A catalytic subunit alpha isoform OS=Mus musculus OX=10090 GN=Ppp2ca PE=1 SV=1	1	12	12	1	7	9	6	6	6	10	9	11	7	12	7	9	6	6	6	10	9	11	7	12	0	0	0	0	0	0	0	0	0	1	51.8	51.8	4.2	35.608	309	309	1	102
P67778	P67778	8	8	8	Prohibitin	Phb	sp|P67778|PHB_MOUSE Prohibitin OS=Mus musculus OX=10090 GN=Phb PE=1 SV=1	1	8	8	8	6	7	6	4	4	0	0	0	0	1	6	7	6	4	4	0	0	0	0	1	6	7	6	4	4	0	0	0	0	1	34.9	34.9	34.9	29.82	272	272	1	28
P67871	P67871	10	10	10	Casein kinase II subunit beta	Csnk2b	sp|P67871|CSK2B_MOUSE Casein kinase II subunit beta OS=Mus musculus OX=10090 GN=Csnk2b PE=1 SV=1	1	10	10	10	6	6	6	6	5	8	7	7	4	9	6	6	6	6	5	8	7	7	4	9	6	6	6	6	5	8	7	7	4	9	59.5	59.5	59.5	24.942	215	215	1	76
P67984;Q9D7S7	P67984	6;1	6;1	6;1	60S ribosomal protein L22	Rpl22	sp|P67984|RL22_MOUSE 60S ribosomal protein L22 OS=Mus musculus OX=10090 GN=Rpl22 PE=1 SV=2	2	6	6	6	3	5	3	5	4	5	6	5	5	5	3	5	3	5	4	5	6	5	5	5	3	5	3	5	4	5	6	5	5	5	50.8	50.8	50.8	14.759	128	128;122	1	58
P68134;P68033;P63268;P62737	P68134;P68033;P63268;P62737	19;19;18;18	2;2;2;2	2;2;2;2	Actin, alpha skeletal muscle;Actin, alpha cardiac muscle 1;Actin, gamma-enteric smooth muscle;Actin, aortic smooth muscle	Acta1;Actc1;Actg2;Acta2	sp|P68134|ACTS_MOUSE Actin, alpha skeletal muscle OS=Mus musculus OX=10090 GN=Acta1 PE=1 SV=1;sp|P68033|ACTC_MOUSE Actin, alpha cardiac muscle 1 OS=Mus musculus OX=10090 GN=Actc1 PE=1 SV=1;sp|P63268|ACTH_MOUSE Actin, gamma-enteric smooth muscle OS=Mus musc	4	19	2	2	18	18	18	17	18	16	17	16	15	18	1	2	2	1	1	1	2	2	1	2	1	2	2	1	1	1	2	2	1	2	36.6	6.1	6.1	42.051	377	377;377;376;377	1	56
P68037	P68037	7	7	7	Ubiquitin-conjugating enzyme E2 L3	Ube2l3	sp|P68037|UB2L3_MOUSE Ubiquitin-conjugating enzyme E2 L3 OS=Mus musculus OX=10090 GN=Ube2l3 PE=1 SV=1	1	7	7	7	3	3	4	3	2	4	5	7	5	7	3	3	4	3	2	4	5	7	5	7	3	3	4	3	2	4	5	7	5	7	63.6	63.6	63.6	17.861	154	154	1	50
P68040	P68040	24	24	24	Guanine nucleotide-binding protein subunit beta-2-like 1;Guanine nucleotide-binding protein subunit beta-2-like 1, N-terminally processed	Gnb2l1	sp|P68040|RACK1_MOUSE Receptor of activated protein C kinase 1 OS=Mus musculus OX=10090 GN=Rack1 PE=1 SV=3	1	24	24	24	18	22	21	18	20	23	23	23	17	23	18	22	21	18	20	23	23	23	17	23	18	22	21	18	20	23	23	23	17	23	81.7	81.7	81.7	35.076	317	317	1	311
P68254	P68254	11	8	8	14-3-3 protein theta	Ywhaq	sp|P68254|1433T_MOUSE 14-3-3 protein theta OS=Mus musculus OX=10090 GN=Ywhaq PE=1 SV=1	1	11	8	8	6	9	9	7	8	10	11	11	6	11	4	6	6	5	6	7	8	8	5	8	4	6	6	5	6	7	8	8	5	8	53.1	42	42	27.778	245	245	1	77
P68369;P05214	P68369;P05214	24;17	3;3	1;1	Tubulin alpha-1A chain;Tubulin alpha-3 chain	Tuba1a;Tuba3a	sp|P68369|TBA1A_MOUSE Tubulin alpha-1A chain OS=Mus musculus OX=10090 GN=Tuba1a PE=1 SV=1;sp|P05214|TBA3_MOUSE Tubulin alpha-3 chain OS=Mus musculus OX=10090 GN=Tuba3b PE=1 SV=1	2	24	3	1	17	19	14	17	13	20	17	20	13	22	3	2	2	2	1	3	2	3	0	3	1	0	0	0	0	1	0	1	0	1	65.9	6.2	3.1	50.135	451	451;450	1	27
P68372;Q9D6F9	P68372;Q9D6F9	23;18	23;18	4;3	Tubulin beta-4B chain;Tubulin beta-4A chain	Tubb4b;Tubb4a	sp|P68372|TBB4B_MOUSE Tubulin beta-4B chain OS=Mus musculus OX=10090 GN=Tubb4b PE=1 SV=1;sp|Q9D6F9|TBB4A_MOUSE Tubulin beta-4A chain OS=Mus musculus OX=10090 GN=Tubb4a PE=1 SV=3	2	23	23	4	18	23	20	22	18	22	23	21	19	23	18	23	20	22	18	22	23	21	19	23	4	4	4	4	3	4	4	4	3	4	64.5	64.5	10.3	49.83	445	445;444	1	314
P68510	P68510	15	13	12	14-3-3 protein eta	Ywhah	sp|P68510|1433F_MOUSE 14-3-3 protein eta OS=Mus musculus OX=10090 GN=Ywhah PE=1 SV=2	1	15	13	12	7	10	11	11	9	13	11	15	11	12	6	8	9	10	8	11	9	13	10	10	5	7	8	9	7	10	8	12	9	9	57.3	53.3	49.2	28.211	246	246	1	109
Q6VN19;P69566	Q6VN19;P69566	1;1	1;1	1;1	Ran-binding protein 10;Ran-binding protein 9	Ranbp10;Ranbp9	sp|Q6VN19|RBP10_MOUSE Ran-binding protein 10 OS=Mus musculus OX=10090 GN=Ranbp10 PE=1 SV=2;sp|P69566|RANB9_MOUSE Ran-binding protein 9 OS=Mus musculus OX=10090 GN=Ranbp9 PE=1 SV=1	2	1	1	1	1	1	0	0	0	1	1	1	0	0	1	1	0	0	0	1	1	1	0	0	1	1	0	0	0	1	1	1	0	0	2.7	2.7	2.7	67.188	620	620;653	1	5
P70121	P70121	2	2	2	Zinc fingers and homeoboxes protein 1	Zhx1	sp|P70121|ZHX1_MOUSE Zinc fingers and homeoboxes protein 1 OS=Mus musculus OX=10090 GN=Zhx1 PE=1 SV=2	1	2	2	2	0	2	0	0	0	2	2	1	0	2	0	2	0	0	0	2	2	1	0	2	0	2	0	0	0	2	2	1	0	2	8.8	8.8	8.8	97.55	873	873	1	9
P70122	P70122	10	10	10	Ribosome maturation protein SBDS	Sbds	sp|P70122|SBDS_MOUSE Ribosome maturation protein SBDS OS=Mus musculus OX=10090 GN=Sbds PE=1 SV=4	1	10	10	10	1	3	2	2	2	3	4	5	1	7	1	3	2	2	2	3	4	5	1	7	1	3	2	2	2	3	4	5	1	7	44.8	44.8	44.8	28.78	250	250	1	30
P70168	P70168	42	42	42	Importin subunit beta-1	Kpnb1	sp|P70168|IMB1_MOUSE Importin subunit beta-1 OS=Mus musculus OX=10090 GN=Kpnb1 PE=1 SV=2	1	42	42	42	31	33	34	32	32	33	37	35	22	38	31	33	34	32	32	33	37	35	22	38	31	33	34	32	32	33	37	35	22	38	55.4	55.4	55.4	97.183	876	876	1	504
P70182	P70182	5	5	5	Phosphatidylinositol 4-phosphate 5-kinase type-1 alpha	Pip5k1a	sp|P70182|PI51A_MOUSE Phosphatidylinositol 4-phosphate 5-kinase type-1 alpha OS=Mus musculus OX=10090 GN=Pip5k1a PE=1 SV=2	1	5	5	5	2	1	3	0	1	4	4	3	2	3	2	1	3	0	1	4	4	3	2	3	2	1	3	0	1	4	4	3	2	3	10.6	10.6	10.6	60.484	546	546	1	23
P70195	P70195	2	2	2	Proteasome subunit beta type-7	Psmb7	sp|P70195|PSB7_MOUSE Proteasome subunit beta type-7 OS=Mus musculus OX=10090 GN=Psmb7 PE=1 SV=1	1	2	2	2	0	1	0	1	1	1	1	1	0	2	0	1	0	1	1	1	1	1	0	2	0	1	0	1	1	1	1	1	0	2	7.9	7.9	7.9	29.891	277	277	1	8
P70255	P70255	10	9	9	Nuclear factor 1 C-type	Nfic	sp|P70255|NFIC_MOUSE Nuclear factor 1 C-type OS=Mus musculus OX=10090 GN=Nfic PE=1 SV=1	1	10	9	9	7	7	6	6	7	7	9	7	2	10	7	7	5	5	6	6	8	6	1	9	7	7	5	5	6	6	8	6	1	9	33.7	31.2	31.2	48.768	439	439	1	69
P70257;Q02780	P70257	8;2	7;1	7;1	Nuclear factor 1 X-type	Nfix	sp|P70257|NFIX_MOUSE Nuclear factor 1 X-type OS=Mus musculus OX=10090 GN=Nfix PE=1 SV=2	2	8	7	7	4	6	5	5	7	5	6	6	4	6	4	6	4	4	6	4	5	5	3	5	4	6	4	4	6	4	5	5	3	5	20.3	18	18	53.394	488	488;532	1	48
P70279	P70279	5	5	5	Surfeit locus protein 6	Surf6	sp|P70279|SURF6_MOUSE Surfeit locus protein 6 OS=Mus musculus OX=10090 GN=Surf6 PE=1 SV=1	1	5	5	5	4	4	3	2	2	2	1	4	1	3	4	4	3	2	2	2	1	4	1	3	4	4	3	2	2	2	1	4	1	3	13	13	13	41.234	355	355	1	27
P70288	P70288	21	12	12	Histone deacetylase 2	Hdac2	sp|P70288|HDAC2_MOUSE Histone deacetylase 2 OS=Mus musculus OX=10090 GN=Hdac2 PE=1 SV=1	1	21	12	12	13	17	19	16	16	19	19	20	15	18	6	9	12	10	8	10	11	11	8	11	6	9	12	10	8	10	11	11	8	11	49.6	35.7	35.7	55.302	488	488	1	155
P70296	P70296	6	6	6	Phosphatidylethanolamine-binding protein 1;Hippocampal cholinergic neurostimulating peptide	Pebp1	sp|P70296|PEBP1_MOUSE Phosphatidylethanolamine-binding protein 1 OS=Mus musculus OX=10090 GN=Pebp1 PE=1 SV=3	1	6	6	6	3	2	4	2	6	1	3	1	4	2	3	2	4	2	6	1	3	1	4	2	3	2	4	2	6	1	3	1	4	2	48.1	48.1	48.1	20.83	187	187	1	29
P70297	P70297	7	7	6	Signal transducing adapter molecule 1	Stam	sp|P70297|STAM1_MOUSE Signal transducing adapter molecule 1 OS=Mus musculus OX=10090 GN=Stam PE=1 SV=3	1	7	7	6	2	3	5	3	1	6	6	6	0	6	2	3	5	3	1	6	6	6	0	6	1	2	4	2	0	5	5	6	0	6	17.3	17.3	15.5	59.771	548	548	1	38
P70318	P70318	20	20	16	Nucleolysin TIAR	Tial1	sp|P70318|TIAR_MOUSE Nucleolysin TIAR OS=Mus musculus OX=10090 GN=Tial1 PE=1 SV=1	1	20	20	16	16	18	19	19	17	18	17	19	11	15	16	18	19	19	17	18	17	19	11	15	12	14	15	15	13	14	13	15	9	12	59.7	59.7	49.7	43.388	392	392	1	242
P70333	P70333	18	8	8	Heterogeneous nuclear ribonucleoprotein H2	Hnrnph2	sp|P70333|HNRH2_MOUSE Heterogeneous nuclear ribonucleoprotein H2 OS=Mus musculus OX=10090 GN=Hnrnph2 PE=1 SV=1	1	18	8	8	9	13	11	12	12	15	15	16	13	18	3	6	5	5	5	6	6	7	4	8	3	6	5	5	5	6	6	7	4	8	47.4	25.8	25.8	49.279	449	449	1	90
P70335	P70335	22	15	15	Rho-associated protein kinase 1	Rock1	sp|P70335|ROCK1_MOUSE Rho-associated protein kinase 1 OS=Mus musculus OX=10090 GN=Rock1 PE=1 SV=1	1	22	15	15	8	14	10	10	8	13	10	16	4	17	5	10	6	5	4	7	6	10	2	12	5	10	6	5	4	7	6	10	2	12	17.3	13.1	13.1	158.17	1354	1354	1	67
P70336;REV__Q7M6Z4;P55012	P70336	48;1;1	48;1;1	41;1;1	Rho-associated protein kinase 2	Rock2	sp|P70336|ROCK2_MOUSE Rho-associated protein kinase 2 OS=Mus musculus OX=10090 GN=Rock2 PE=1 SV=1	3	48	48	41	26	33	31	29	25	37	30	40	11	37	26	33	31	29	25	37	30	40	11	37	23	29	27	24	21	31	26	34	9	32	39.1	39.1	35	160.58	1388	1388;1394;1205	1	321
P70349	P70349	1	1	1	Histidine triad nucleotide-binding protein 1	Hint1	sp|P70349|HINT1_MOUSE Histidine triad nucleotide-binding protein 1 OS=Mus musculus OX=10090 GN=Hint1 PE=1 SV=3	1	1	1	1	1	1	1	1	1	1	1	1	1	1	1	1	1	1	1	1	1	1	1	1	1	1	1	1	1	1	1	1	1	1	11.1	11.1	11.1	13.777	126	126	1	10
P70353	P70353	6	6	6	Nuclear transcription factor Y subunit gamma	Nfyc	sp|P70353|NFYC_MOUSE Nuclear transcription factor Y subunit gamma OS=Mus musculus OX=10090 GN=Nfyc PE=1 SV=2	1	6	6	6	4	5	6	5	4	5	4	6	4	6	4	5	6	5	4	5	4	6	4	6	4	5	6	5	4	5	4	6	4	6	18.2	18.2	18.2	37.253	335	335	1	49
P70362	P70362	11	11	11	Ubiquitin fusion degradation protein 1 homolog	Ufd1l	sp|P70362|UFD1_MOUSE Ubiquitin recognition factor in ER-associated degradation protein 1 OS=Mus musculus OX=10090 GN=Ufd1 PE=1 SV=2	1	11	11	11	9	11	11	9	10	11	11	11	8	11	9	11	11	9	10	11	11	11	8	11	9	11	11	9	10	11	11	11	8	11	37.5	37.5	37.5	34.481	307	307	1	163
P70372	P70372	19	19	18	ELAV-like protein 1	Elavl1	sp|P70372|ELAV1_MOUSE ELAV-like protein 1 OS=Mus musculus OX=10090 GN=Elavl1 PE=1 SV=2	1	19	19	18	16	17	17	17	18	17	18	18	16	17	16	17	17	17	18	17	18	18	16	17	15	16	16	16	17	16	17	17	15	16	63.8	63.8	61	36.169	326	326	1	297
P70388	P70388	29	29	29	DNA repair protein RAD50	Rad50	sp|P70388|RAD50_MOUSE DNA repair protein RAD50 OS=Mus musculus OX=10090 GN=Rad50 PE=1 SV=1	1	29	29	29	9	15	12	6	6	19	16	25	9	24	9	15	12	6	6	19	16	25	9	24	9	15	12	6	6	19	16	25	9	24	24.8	24.8	24.8	153.49	1312	1312	1	144
P70398;F8VPU6;REV__O08810;P40753	P70398;F8VPU6	8;4;1;1	8;4;1;1	8;4;1;1	Probable ubiquitin carboxyl-terminal hydrolase FAF-X;Ubiquitin carboxyl-terminal hydrolase	Usp9x;Usp9y	sp|P70398|USP9X_MOUSE Probable ubiquitin carboxyl-terminal hydrolase FAF-X OS=Mus musculus OX=10090 GN=Usp9x PE=1 SV=2;tr|F8VPU6|F8VPU6_MOUSE Ubiquitinyl hydrolase 1 OS=Mus musculus OX=10090 GN=Usp9y PE=1 SV=1	4	8	8	8	2	3	2	2	2	3	3	6	1	8	2	3	2	2	2	3	3	6	1	8	2	3	2	2	2	3	3	6	1	8	3.4	3.4	3.4	290.71	2559	2559;2556;971;121	1	32
P70399	P70399	30	30	30	Tumor suppressor p53-binding protein 1	Tp53bp1	sp|P70399|TP53B_MOUSE TP53-binding protein 1 OS=Mus musculus OX=10090 GN=Tp53bp1 PE=1 SV=3	1	30	30	30	12	16	15	11	10	20	23	24	11	27	12	16	15	11	10	20	23	24	11	27	12	16	15	11	10	20	23	24	11	27	25.9	25.9	25.9	212.73	1969	1969	1	192
P70404	P70404	2	2	2	Isocitrate dehydrogenase [NAD] subunit gamma 1, mitochondrial	Idh3g	sp|P70404|IDHG1_MOUSE Isocitrate dehydrogenase [NAD] subunit gamma 1, mitochondrial OS=Mus musculus OX=10090 GN=Idh3g PE=1 SV=1	1	2	2	2	0	2	0	0	0	0	0	0	0	0	0	2	0	0	0	0	0	0	0	0	0	2	0	0	0	0	0	0	0	0	6.1	6.1	6.1	42.785	393	393	1	2
P70441	P70441	5	5	5	Na(+)/H(+) exchange regulatory cofactor NHE-RF1	Slc9a3r1	sp|P70441|NHRF1_MOUSE Na(+)/H(+) exchange regulatory cofactor NHE-RF1 OS=Mus musculus OX=10090 GN=Slc9a3r1 PE=1 SV=3	1	5	5	5	2	2	2	3	2	3	5	2	2	4	2	2	2	3	2	3	5	2	2	4	2	2	2	3	2	3	5	2	2	4	20.6	20.6	20.6	38.6	355	355	1	28
P70444	P70444	3	3	3	BH3-interacting domain death agonist;BH3-interacting domain death agonist p15;BH3-interacting domain death agonist p13;BH3-interacting domain death agonist p11	Bid	sp|P70444|BID_MOUSE BH3-interacting domain death agonist OS=Mus musculus OX=10090 GN=Bid PE=1 SV=2	1	3	3	3	0	1	0	0	0	3	1	3	0	3	0	1	0	0	0	3	1	3	0	3	0	1	0	0	0	3	1	3	0	3	22.6	22.6	22.6	21.951	195	195	1	11
P70451	P70451	4	4	4	Tyrosine-protein kinase Fer	Fer	sp|P70451|FER_MOUSE Tyrosine-protein kinase Fer OS=Mus musculus OX=10090 GN=Fer PE=1 SV=2	1	4	4	4	0	2	0	1	0	2	0	2	0	4	0	2	0	1	0	2	0	2	0	4	0	2	0	1	0	2	0	2	0	4	7.8	7.8	7.8	94.578	823	823	1	11
P70460	P70460	13	13	13	Vasodilator-stimulated phosphoprotein	Vasp	sp|P70460|VASP_MOUSE Vasodilator-stimulated phosphoprotein OS=Mus musculus OX=10090 GN=Vasp PE=1 SV=4	1	13	13	13	5	7	9	7	6	10	9	11	2	12	5	7	9	7	6	10	9	11	2	12	5	7	9	7	6	10	9	11	2	12	41.6	41.6	41.6	39.666	375	375	1	82
P70662	P70662	4	4	4	LIM domain-binding protein 1	Ldb1	sp|P70662|LDB1_MOUSE LIM domain-binding protein 1 OS=Mus musculus OX=10090 GN=Ldb1 PE=1 SV=2	1	4	4	4	3	2	3	1	0	4	4	3	0	3	3	2	3	1	0	4	4	3	0	3	3	2	3	1	0	4	4	3	0	3	12.4	12.4	12.4	46.502	411	411	1	29
P70670	P70670	6	6	6	Nascent polypeptide-associated complex subunit alpha, muscle-specific form	Naca	sp|P70670|NACAM_MOUSE Nascent polypeptide-associated complex subunit alpha, muscle-specific form OS=Mus musculus OX=10090 GN=Naca PE=1 SV=2	1	6	6	6	3	4	5	4	4	5	5	6	5	6	3	4	5	4	4	5	5	6	5	6	3	4	5	4	4	5	5	6	5	6	3.2	3.2	3.2	220.5	2187	2187	1	62
P70671	P70671	2	2	2	Interferon regulatory factor 3	Irf3	sp|P70671|IRF3_MOUSE Interferon regulatory factor 3 OS=Mus musculus OX=10090 GN=Irf3 PE=1 SV=1	1	2	2	2	1	1	1	1	0	0	0	0	0	2	1	1	1	1	0	0	0	0	0	2	1	1	1	1	0	0	0	0	0	2	9.1	9.1	9.1	46.852	419	419	1	6
P70698	P70698	1	1	1	CTP synthase 1	Ctps1	sp|P70698|PYRG1_MOUSE CTP synthase 1 OS=Mus musculus OX=10090 GN=Ctps1 PE=1 SV=2	1	1	1	1	0	0	0	0	0	1	1	0	1	1	0	0	0	0	0	1	1	0	1	1	0	0	0	0	0	1	1	0	1	1	3	3	3	66.682	591	591	1	4
P70699	P70699	1	1	1	Lysosomal alpha-glucosidase	Gaa	sp|P70699|LYAG_MOUSE Lysosomal alpha-glucosidase OS=Mus musculus OX=10090 GN=Gaa PE=1 SV=2	1	1	1	1	0	1	1	0	0	0	0	0	0	1	0	1	1	0	0	0	0	0	0	1	0	1	1	0	0	0	0	0	0	1	1	1	1	106.25	953	953	1	3
P70700	P70700	15	15	15	DNA-directed RNA polymerase I subunit RPA2	Polr1b	sp|P70700|RPA2_MOUSE DNA-directed RNA polymerase I subunit RPA2 OS=Mus musculus OX=10090 GN=Polr1b PE=1 SV=2	1	15	15	15	9	10	9	8	7	10	7	11	6	11	9	10	9	8	7	10	7	11	6	11	9	10	9	8	7	10	7	11	6	11	16.6	16.6	16.6	128.21	1135	1135	1	88
P80313	P80313	34	34	34	T-complex protein 1 subunit eta	Cct7	sp|P80313|TCPH_MOUSE T-complex protein 1 subunit eta OS=Mus musculus OX=10090 GN=Cct7 PE=1 SV=1	1	34	34	34	18	26	25	19	22	29	28	30	21	32	18	26	25	19	22	29	28	30	21	32	18	26	25	19	22	29	28	30	21	32	66.5	66.5	66.5	59.652	544	544	1	330
P80314	P80314	32	32	32	T-complex protein 1 subunit beta	Cct2	sp|P80314|TCPB_MOUSE T-complex protein 1 subunit beta OS=Mus musculus OX=10090 GN=Cct2 PE=1 SV=4	1	32	32	32	23	26	25	21	23	28	28	30	21	29	23	26	25	21	23	28	28	30	21	29	23	26	25	21	23	28	28	30	21	29	77.8	77.8	77.8	57.477	535	535	1	386
P80315	P80315	26	26	26	T-complex protein 1 subunit delta	Cct4	sp|P80315|TCPD_MOUSE T-complex protein 1 subunit delta OS=Mus musculus OX=10090 GN=Cct4 PE=1 SV=3	1	26	26	26	16	21	23	18	17	23	23	25	18	24	16	21	23	18	17	23	23	25	18	24	16	21	23	18	17	23	23	25	18	24	61	61	61	58.066	539	539	1	287
P80316	P80316	31	31	31	T-complex protein 1 subunit epsilon	Cct5	sp|P80316|TCPE_MOUSE T-complex protein 1 subunit epsilon OS=Mus musculus OX=10090 GN=Cct5 PE=1 SV=1	1	31	31	31	18	30	26	21	20	28	26	30	19	30	18	30	26	21	20	28	26	30	19	30	18	30	26	21	20	28	26	30	19	30	68	68	68	59.623	541	541	1	381
P80317	P80317	29	29	24	T-complex protein 1 subunit zeta	Cct6a	sp|P80317|TCPZ_MOUSE T-complex protein 1 subunit zeta OS=Mus musculus OX=10090 GN=Cct6a PE=1 SV=3	1	29	29	24	17	22	26	23	21	22	22	25	14	27	17	22	26	23	21	22	22	25	14	27	12	17	21	18	17	18	17	21	12	22	69.5	69.5	62.3	58.004	531	531	1	303
P80318	P80318	32	32	32	T-complex protein 1 subunit gamma	Cct3	sp|P80318|TCPG_MOUSE T-complex protein 1 subunit gamma OS=Mus musculus OX=10090 GN=Cct3 PE=1 SV=1	1	32	32	32	22	28	28	23	21	30	29	32	24	31	22	28	28	23	21	30	29	32	24	31	22	28	28	23	21	30	29	32	24	31	69.2	69.2	69.2	60.629	545	545	1	331
P81069	P81069	5	5	4	GA-binding protein subunit beta-2	Gabpb2	sp|P81069|GABP2_MOUSE GA-binding protein subunit beta-2 OS=Mus musculus OX=10090 GN=Gabpb2 PE=1 SV=2	1	5	5	4	0	2	3	3	1	2	3	4	0	4	0	2	3	3	1	2	3	4	0	4	0	1	2	2	1	1	2	3	0	4	22.5	22.5	20.8	45.658	414	414	1	22
P81117	P81117	4	4	4	Nucleobindin-2;Nesfatin-1	Nucb2	sp|P81117|NUCB2_MOUSE Nucleobindin-2 OS=Mus musculus OX=10090 GN=Nucb2 PE=1 SV=2	1	4	4	4	3	3	3	3	4	2	3	2	2	4	3	3	3	3	4	2	3	2	2	4	3	3	3	3	4	2	3	2	2	4	13.8	13.8	13.8	50.304	420	420	1	29
P81269	P81269	4	2	2	Cyclic AMP-dependent transcription factor ATF-1	Atf1	sp|P81269|ATF1_MOUSE Cyclic AMP-dependent transcription factor ATF-1 OS=Mus musculus OX=10090 GN=Atf1 PE=1 SV=1	1	4	2	2	3	3	3	2	2	2	3	2	1	3	1	1	1	0	0	1	1	1	1	2	1	1	1	0	0	1	1	1	1	2	18.6	12.6	12.6	29.237	269	269	1	9
P83870	P83870	9	9	9	PHD finger-like domain-containing protein 5A	Phf5a	sp|P83870|PHF5A_MOUSE PHD finger-like domain-containing protein 5A OS=Mus musculus OX=10090 GN=Phf5a PE=1 SV=1	1	9	9	9	6	7	8	8	7	9	8	9	4	9	6	7	8	8	7	9	8	9	4	9	6	7	8	8	7	9	8	9	4	9	70.9	70.9	70.9	12.405	110	110	1	86
P83877	P83877	10	10	10	Thioredoxin-like protein 4A	Txnl4a	sp|P83877|TXN4A_MOUSE Thioredoxin-like protein 4A OS=Mus musculus OX=10090 GN=Txnl4a PE=1 SV=1	1	10	10	10	6	9	7	5	6	10	9	10	8	10	6	9	7	5	6	10	9	10	8	10	6	9	7	5	6	10	9	10	8	10	88	88	88	16.786	142	142	1	115
P83887;Q8VCK3	P83887;Q8VCK3	8;6	8;6	8;6	Tubulin gamma-1 chain;Tubulin gamma-2 chain	Tubg1;Tubg2	sp|P83887|TBG1_MOUSE Tubulin gamma-1 chain OS=Mus musculus OX=10090 GN=Tubg1 PE=1 SV=1;sp|Q8VCK3|TBG2_MOUSE Tubulin gamma-2 chain OS=Mus musculus OX=10090 GN=Tubg2 PE=1 SV=1	2	8	8	8	1	4	3	3	2	4	5	4	0	8	1	4	3	3	2	4	5	4	0	8	1	4	3	3	2	4	5	4	0	8	32.2	32.2	32.2	51.1	451	451;451	1	34
P83917	P83917	3	2	2	Chromobox protein homolog 1	Cbx1	sp|P83917|CBX1_MOUSE Chromobox protein homolog 1 OS=Mus musculus OX=10090 GN=Cbx1 PE=1 SV=1	1	3	2	2	2	2	3	2	3	2	2	2	2	2	1	1	2	1	2	1	1	1	1	1	1	1	2	1	2	1	1	1	1	1	21.1	12.4	12.4	21.418	185	185	1	12
P83940	P83940	5	5	5	Transcription elongation factor B polypeptide 1	Tceb1	sp|P83940|ELOC_MOUSE Elongin-C OS=Mus musculus OX=10090 GN=Eloc PE=1 SV=1	1	5	5	5	3	5	5	4	4	5	5	5	4	5	3	5	5	4	4	5	5	5	4	5	3	5	5	4	4	5	5	5	4	5	56.2	56.2	56.2	12.473	112	112	1	62
P84084	P84084	4	1	1	ADP-ribosylation factor 5	Arf5	sp|P84084|ARF5_MOUSE ADP-ribosylation factor 5 OS=Mus musculus OX=10090 GN=Arf5 PE=1 SV=2	1	4	1	1	1	3	0	1	1	2	3	3	0	3	0	0	0	0	0	0	1	1	0	1	0	0	0	0	0	0	1	1	0	1	28.9	5.6	5.6	20.529	180	180	1	3
P84089	P84089	7	7	7	Enhancer of rudimentary homolog	Erh	sp|P84089|ERH_MOUSE Enhancer of rudimentary homolog OS=Mus musculus OX=10090 GN=Erh PE=1 SV=1	1	7	7	7	6	7	7	6	7	7	7	7	6	5	6	7	7	6	7	7	7	7	6	5	6	7	7	6	7	7	7	7	6	5	55.8	55.8	55.8	12.259	104	104	1	128
P84091	P84091	17	17	17	AP-2 complex subunit mu	Ap2m1	sp|P84091|AP2M1_MOUSE AP-2 complex subunit mu OS=Mus musculus OX=10090 GN=Ap2m1 PE=1 SV=1	1	17	17	17	10	17	13	10	13	15	15	15	8	13	10	17	13	10	13	15	15	15	8	13	10	17	13	10	13	15	15	15	8	13	43	43	43	49.654	435	435	1	138
P84099	P84099	7	7	7	60S ribosomal protein L19	Rpl19	sp|P84099|RL19_MOUSE 60S ribosomal protein L19 OS=Mus musculus OX=10090 GN=Rpl19 PE=1 SV=1	1	7	7	7	4	7	6	3	4	6	7	7	1	5	4	7	6	3	4	6	7	7	1	5	4	7	6	3	4	6	7	7	1	5	24.5	24.5	24.5	23.466	196	196	1	52
P84104	P84104	10	9	9	Serine/arginine-rich splicing factor 3	Srsf3	sp|P84104|SRSF3_MOUSE Serine/arginine-rich splicing factor 3 OS=Mus musculus OX=10090 GN=Srsf3 PE=1 SV=1	1	10	9	9	6	8	8	8	9	9	10	9	9	8	6	7	7	7	8	8	9	8	8	7	6	7	7	7	8	8	9	8	8	7	46.3	46.3	46.3	19.329	164	164	1	111
P97304	P97304	6	6	6	DNA-directed RNA polymerases I and III subunit RPAC2	Polr1d	sp|P97304|RPAC2_MOUSE DNA-directed RNA polymerases I and III subunit RPAC2 OS=Mus musculus OX=10090 GN=Polr1d PE=1 SV=1	1	6	6	6	4	3	3	4	3	4	2	4	1	5	4	3	3	4	3	4	2	4	1	5	4	3	3	4	3	4	2	4	1	5	64.7	64.7	64.7	15.072	133	133	1	33
P97305	P97305	8	8	8	Nuclear factor of activated T-cells, cytoplasmic 3	Nfatc3	sp|P97305|NFAC3_MOUSE Nuclear factor of activated T-cells, cytoplasmic 3 OS=Mus musculus OX=10090 GN=Nfatc3 PE=1 SV=1	1	8	8	8	1	1	0	0	0	6	6	7	2	6	1	1	0	0	0	6	6	7	2	6	1	1	0	0	0	6	6	7	2	6	11.5	11.5	11.5	115.45	1075	1075	1	29
P97310	P97310	11	11	11	DNA replication licensing factor MCM2	Mcm2	sp|P97310|MCM2_MOUSE DNA replication licensing factor MCM2 OS=Mus musculus OX=10090 GN=Mcm2 PE=1 SV=3	1	11	11	11	6	9	5	5	4	6	7	10	1	7	6	9	5	5	4	6	7	10	1	7	6	9	5	5	4	6	7	10	1	7	13.8	13.8	13.8	102.08	904	904	1	60
P97311	P97311	20	20	20	DNA replication licensing factor MCM6	Mcm6	sp|P97311|MCM6_MOUSE DNA replication licensing factor MCM6 OS=Mus musculus OX=10090 GN=Mcm6 PE=1 SV=1	1	20	20	20	11	14	8	6	5	9	11	15	4	15	11	14	8	6	5	9	11	15	4	15	11	14	8	6	5	9	11	15	4	15	30.1	30.1	30.1	92.866	821	821	1	98
P97315	P97315	5	5	5	Cysteine and glycine-rich protein 1	Csrp1	sp|P97315|CSRP1_MOUSE Cysteine and glycine-rich protein 1 OS=Mus musculus OX=10090 GN=Csrp1 PE=1 SV=3	1	5	5	5	2	4	3	0	4	0	3	1	2	5	2	4	3	0	4	0	3	1	2	5	2	4	3	0	4	0	3	1	2	5	37.8	37.8	37.8	20.583	193	193	1	24
P97350	P97350	1	1	1	Plakophilin-1	Pkp1	sp|P97350|PKP1_MOUSE Plakophilin-1 OS=Mus musculus OX=10090 GN=Pkp1 PE=1 SV=1	1	1	1	1	1	0	0	0	1	1	1	0	0	1	1	0	0	0	1	1	1	0	0	1	1	0	0	0	1	1	1	0	0	1	2.1	2.1	2.1	80.895	728	728	1	5
P97351	P97351	15	15	15	40S ribosomal protein S3a	Rps3a	sp|P97351|RS3A_MOUSE 40S ribosomal protein S3a OS=Mus musculus OX=10090 GN=Rps3a PE=1 SV=3	1	15	15	15	9	10	12	10	12	13	13	14	11	15	9	10	12	10	12	13	13	14	11	15	9	10	12	10	12	13	13	14	11	15	54.2	54.2	54.2	29.885	264	264	1	147
P97357	P97357	2	2	2	TATA box-binding protein-associated factor RNA polymerase I subunit A	Taf1a	sp|P97357|TAF1A_MOUSE TATA box-binding protein-associated factor RNA polymerase I subunit A OS=Mus musculus OX=10090 GN=Taf1a PE=1 SV=1	1	2	2	2	2	2	2	0	1	2	1	1	0	2	2	2	2	0	1	2	1	1	0	2	2	2	2	0	1	2	1	1	0	2	5.5	5.5	5.5	52.717	453	453	1	13
P97360	P97360	18	18	18	Transcription factor ETV6	Etv6	sp|P97360|ETV6_MOUSE Transcription factor ETV6 OS=Mus musculus OX=10090 GN=Etv6 PE=1 SV=1	1	18	18	18	13	16	14	11	14	16	13	17	5	18	13	16	14	11	14	16	13	17	5	18	13	16	14	11	14	16	13	17	5	18	46.6	46.6	46.6	56.405	485	485	1	178
P97371	P97371	11	11	11	Proteasome activator complex subunit 1	Psme1	sp|P97371|PSME1_MOUSE Proteasome activator complex subunit 1 OS=Mus musculus OX=10090 GN=Psme1 PE=1 SV=2	1	11	11	11	4	8	6	4	4	10	6	10	5	9	4	8	6	4	4	10	6	10	5	9	4	8	6	4	4	10	6	10	5	9	57.8	57.8	57.8	28.673	249	249	1	67
P97372	P97372	5	5	5	Proteasome activator complex subunit 2	Psme2	sp|P97372|PSME2_MOUSE Proteasome activator complex subunit 2 OS=Mus musculus OX=10090 GN=Psme2 PE=1 SV=4	1	5	5	5	2	5	4	3	3	5	4	5	1	4	2	5	4	3	3	5	4	5	1	4	2	5	4	3	3	5	4	5	1	4	30.1	30.1	30.1	27.057	239	239	1	45
P97376	P97376	10	10	10	Protein FRG1	Frg1	sp|P97376|FRG1_MOUSE Protein FRG1 OS=Mus musculus OX=10090 GN=Frg1 PE=1 SV=2	1	10	10	10	5	6	9	7	9	9	9	9	8	9	5	6	9	7	9	9	9	9	8	9	5	6	9	7	9	9	9	9	8	9	41.9	41.9	41.9	29.127	258	258	1	86
P97377;Q80YP0	P97377	10;2	9;1	9;1	Cyclin-dependent kinase 2	Cdk2	sp|P97377|CDK2_MOUSE Cyclin-dependent kinase 2 OS=Mus musculus OX=10090 GN=Cdk2 PE=1 SV=2	2	10	9	9	3	7	3	3	2	8	8	8	3	9	2	6	2	2	1	7	7	7	2	8	2	6	2	2	1	7	7	7	2	8	37.9	35.5	35.5	38.978	346	346;303	1	44
P97379	P97379	20	18	18	Ras GTPase-activating protein-binding protein 2	G3bp2	sp|P97379|G3BP2_MOUSE Ras GTPase-activating protein-binding protein 2 OS=Mus musculus OX=10090 GN=G3bp2 PE=1 SV=2	1	20	18	18	12	15	18	14	12	18	16	18	14	20	11	13	16	12	10	16	14	16	12	18	11	13	16	12	10	16	14	16	12	18	49.4	46.9	46.9	54.087	482	482	1	205
P97386	P97386	27	27	27	DNA ligase 3	Lig3	sp|P97386|DNLI3_MOUSE DNA ligase 3 OS=Mus musculus OX=10090 GN=Lig3 PE=1 SV=2	1	27	27	27	15	16	15	14	12	19	17	20	10	21	15	16	15	14	12	19	17	20	10	21	15	16	15	14	12	19	17	20	10	21	33.7	33.7	33.7	113.07	1015	1015	1	162
P97390	P97390	10	10	10	Vacuolar protein sorting-associated protein 45	Vps45	sp|P97390|VPS45_MOUSE Vacuolar protein sorting-associated protein 45 OS=Mus musculus OX=10090 GN=Vps45 PE=1 SV=1	1	10	10	10	2	7	6	3	2	7	4	6	1	9	2	7	6	3	2	7	4	6	1	9	2	7	6	3	2	7	4	6	1	9	23.2	23.2	23.2	65.052	570	570	1	49
P97393	P97393	16	16	16	Rho GTPase-activating protein 5	Arhgap5	sp|P97393|RHG05_MOUSE Rho GTPase-activating protein 5 OS=Mus musculus OX=10090 GN=Arhgap5 PE=1 SV=2	1	16	16	16	3	7	9	9	4	9	6	10	0	14	3	7	9	9	4	9	6	10	0	14	3	7	9	9	4	9	6	10	0	14	13.9	13.9	13.9	172.11	1501	1501	1	71
P97450	P97450	1	1	1	ATP synthase-coupling factor 6, mitochondrial	Atp5j	sp|P97450|ATP5J_MOUSE ATP synthase-coupling factor 6, mitochondrial OS=Mus musculus OX=10090 GN=Atp5pf PE=1 SV=1	1	1	1	1	1	0	1	1	1	0	0	0	0	1	1	0	1	1	1	0	0	0	0	1	1	0	1	1	1	0	0	0	0	1	9.3	9.3	9.3	12.496	108	108	1	5
P97452	P97452	21	21	21	Ribosome biogenesis protein BOP1	Bop1	sp|P97452|BOP1_MOUSE Ribosome biogenesis protein BOP1 OS=Mus musculus OX=10090 GN=Bop1 PE=1 SV=1	1	21	21	21	18	17	18	16	14	14	14	17	3	14	18	17	18	16	14	14	14	17	3	14	18	17	18	16	14	14	14	17	3	14	46	46	46	82.545	732	732	1	174
P97454;P70340	P97454;P70340	2;1	2;1	2;1	Mothers against decapentaplegic homolog 5;Mothers against decapentaplegic homolog 1	Smad5;Smad1	sp|P97454|SMAD5_MOUSE Mothers against decapentaplegic homolog 5 OS=Mus musculus OX=10090 GN=Smad5 PE=1 SV=2;sp|P70340|SMAD1_MOUSE Mothers against decapentaplegic homolog 1 OS=Mus musculus OX=10090 GN=Smad1 PE=1 SV=2	2	2	2	2	1	2	1	0	0	2	2	2	0	2	1	2	1	0	0	2	2	2	0	2	1	2	1	0	0	2	2	2	0	2	6.2	6.2	6.2	52.172	465	465;465	1	12
P97461	P97461	10	10	10	40S ribosomal protein S5;40S ribosomal protein S5, N-terminally processed	Rps5	sp|P97461|RS5_MOUSE 40S ribosomal protein S5 OS=Mus musculus OX=10090 GN=Rps5 PE=1 SV=3	1	10	10	10	6	6	5	3	4	8	5	8	0	7	6	6	5	3	4	8	5	8	0	7	6	6	5	3	4	8	5	8	0	7	32.8	32.8	32.8	22.889	204	204	1	52
P97470	P97470	3	1	1	Serine/threonine-protein phosphatase 4 catalytic subunit	Ppp4c	sp|P97470|PP4C_MOUSE Serine/threonine-protein phosphatase 4 catalytic subunit OS=Mus musculus OX=10090 GN=Ppp4c PE=1 SV=2	1	3	1	1	2	2	2	2	2	2	2	3	2	3	0	0	0	0	0	0	0	1	0	1	0	0	0	0	0	0	0	1	0	1	11.1	6.2	6.2	35.08	307	307	1	2
P97471	P97471	13	13	13	Mothers against decapentaplegic homolog 4	Smad4	sp|P97471|SMAD4_MOUSE Mothers against decapentaplegic homolog 4 OS=Mus musculus OX=10090 GN=Smad4 PE=1 SV=2	1	13	13	13	4	8	7	4	5	9	8	11	2	11	4	8	7	4	5	9	8	11	2	11	4	8	7	4	5	9	8	11	2	11	36.3	36.3	36.3	60.341	551	551	1	75
P97473	P97473	2	2	2	RISC-loading complex subunit TARBP2	Tarbp2	sp|P97473|TRBP2_MOUSE RISC-loading complex subunit TARBP2 OS=Mus musculus OX=10090 GN=Tarbp2 PE=1 SV=2	1	2	2	2	0	1	1	0	0	1	1	1	0	1	0	1	1	0	0	1	1	1	0	1	0	1	1	0	0	1	1	1	0	1	6.8	6.8	6.8	38.842	365	365	1	6
P97477;O70126	P97477	7;1	7;1	7;1	Aurora kinase A	Aurka	sp|P97477|AURKA_MOUSE Aurora kinase A OS=Mus musculus OX=10090 GN=Aurka PE=1 SV=1	2	7	7	7	2	3	1	0	1	7	5	7	1	7	2	3	1	0	1	7	5	7	1	7	2	3	1	0	1	7	5	7	1	7	24.6	24.6	24.6	44.772	395	395;345	1	35
P97480	P97480	2	2	2	Eyes absent homolog 3	Eya3	sp|P97480|EYA3_MOUSE Eyes absent homolog 3 OS=Mus musculus OX=10090 GN=Eya3 PE=1 SV=2	1	2	2	2	0	0	0	0	0	1	1	1	0	2	0	0	0	0	0	1	1	1	0	2	0	0	0	0	0	1	1	1	0	2	5.5	5.5	5.5	55.973	510	510	1	7
P97496	P97496	50	50	36	SWI/SNF complex subunit SMARCC1	Smarcc1	sp|P97496|SMRC1_MOUSE SWI/SNF complex subunit SMARCC1 OS=Mus musculus OX=10090 GN=Smarcc1 PE=1 SV=2	1	50	50	36	31	39	32	34	26	40	35	40	18	44	31	39	32	34	26	40	35	40	18	44	20	26	20	22	18	29	23	28	11	32	52.3	52.3	44	122.89	1104	1104	1	485
P97760	P97760	8	8	8	DNA-directed RNA polymerase II subunit RPB3	Polr2c	sp|P97760|RPB3_MOUSE DNA-directed RNA polymerase II subunit RPB3 OS=Mus musculus OX=10090 GN=Polr2c PE=1 SV=2	1	8	8	8	3	4	4	3	3	3	3	4	3	4	3	4	4	3	3	3	3	4	3	4	3	4	4	3	3	3	3	4	3	4	40.7	40.7	40.7	31.443	275	275	1	34
P97765	P97765	3	3	3	WW domain-binding protein 2	Wbp2	sp|P97765|WBP2_MOUSE WW domain-binding protein 2 OS=Mus musculus OX=10090 GN=Wbp2 PE=1 SV=1	1	3	3	3	0	2	1	2	0	2	0	3	1	3	0	2	1	2	0	2	0	3	1	3	0	2	1	2	0	2	0	3	1	3	16.5	16.5	16.5	28.032	261	261	1	15
P97789	P97789	3	3	3	5-3 exoribonuclease 1	Xrn1	sp|P97789|XRN1_MOUSE 5-3 exoribonuclease 1 OS=Mus musculus OX=10090 GN=Xrn1 PE=1 SV=1	1	3	3	3	0	0	0	0	0	1	0	0	0	3	0	0	0	0	0	1	0	0	0	3	0	0	0	0	0	1	0	0	0	3	2.9	2.9	2.9	194.31	1719	1719	1	4
P97807	P97807	3	3	3	Fumarate hydratase, mitochondrial	Fh	sp|P97807|FUMH_MOUSE Fumarate hydratase, mitochondrial OS=Mus musculus OX=10090 GN=Fh PE=1 SV=3	1	3	3	3	3	3	2	2	2	1	3	1	2	3	3	3	2	2	2	1	3	1	2	3	3	3	2	2	2	1	3	1	2	3	9.7	9.7	9.7	54.356	507	507	1	22
P97820;Q9JM52;P83510	P97820	19;5;5	19;5;5	19;5;5	Mitogen-activated protein kinase kinase kinase kinase 4	Map4k4	sp|P97820|M4K4_MOUSE Mitogen-activated protein kinase kinase kinase kinase 4 OS=Mus musculus OX=10090 GN=Map4k4 PE=1 SV=1	3	19	19	19	8	12	10	7	7	17	16	15	5	17	8	12	10	7	7	17	16	15	5	17	8	12	10	7	7	17	16	15	5	17	20	20	20	140.6	1233	1233;1308;1323	1	120
P97822	P97822	2	2	2	Acidic leucine-rich nuclear phosphoprotein 32 family member E	Anp32e	sp|P97822|AN32E_MOUSE Acidic leucine-rich nuclear phosphoprotein 32 family member E OS=Mus musculus OX=10090 GN=Anp32e PE=1 SV=2	1	2	2	2	1	1	0	1	0	2	2	2	2	1	1	1	0	1	0	2	2	2	2	1	1	1	0	1	0	2	2	2	2	1	11.5	11.5	11.5	29.622	260	260	1	12
P97855	P97855	24	24	22	Ras GTPase-activating protein-binding protein 1	G3bp1	sp|P97855|G3BP1_MOUSE Ras GTPase-activating protein-binding protein 1 OS=Mus musculus OX=10090 GN=G3bp1 PE=1 SV=1	1	24	24	22	16	20	20	18	19	23	24	23	18	20	16	20	20	18	19	23	24	23	18	20	15	18	18	16	17	21	22	21	16	18	58.5	58.5	55.9	51.828	465	465	1	353
P97863	P97863	14	14	13	Nuclear factor 1 B-type	Nfib	sp|P97863|NFIB_MOUSE Nuclear factor 1 B-type OS=Mus musculus OX=10090 GN=Nfib PE=1 SV=2	1	14	14	13	9	10	11	9	5	11	9	10	3	12	9	10	11	9	5	11	9	10	3	12	9	10	10	8	4	10	8	9	2	11	38.9	38.9	37	63.506	570	570	1	100
P97868	P97868	14	14	14	E3 ubiquitin-protein ligase RBBP6	Rbbp6	sp|P97868|RBBP6_MOUSE E3 ubiquitin-protein ligase RBBP6 OS=Mus musculus OX=10090 GN=Rbbp6 PE=1 SV=5	1	14	14	14	7	9	6	6	6	10	7	8	3	11	7	9	6	6	6	10	7	8	3	11	7	9	6	6	6	10	7	8	3	11	11.3	11.3	11.3	199.59	1790	1790	1	80
P98203	P98203	2	2	2	Armadillo repeat protein deleted in velo-cardio-facial syndrome homolog	Arvcf	sp|P98203|ARVC_MOUSE Armadillo repeat protein deleted in velo-cardio-facial syndrome homolog OS=Mus musculus OX=10090 GN=Arvcf PE=1 SV=2	1	2	2	2	0	1	0	0	0	1	1	1	0	2	0	1	0	0	0	1	1	1	0	2	0	1	0	0	0	1	1	1	0	2	3.3	3.3	3.3	105.06	962	962	1	6
P99024	P99024	22	5	4	Tubulin beta-5 chain	Tubb5	sp|P99024|TBB5_MOUSE Tubulin beta-5 chain OS=Mus musculus OX=10090 GN=Tubb5 PE=1 SV=1	1	22	5	4	16	21	18	20	18	20	21	21	18	22	4	4	4	4	4	4	4	5	3	5	3	3	3	3	3	3	3	4	3	4	66.4	19.4	16	49.67	444	444	1	82
P99026	P99026	1	1	1	Proteasome subunit beta type-4	Psmb4	sp|P99026|PSB4_MOUSE Proteasome subunit beta type-4 OS=Mus musculus OX=10090 GN=Psmb4 PE=1 SV=1	1	1	1	1	1	1	1	1	1	1	1	1	1	1	1	1	1	1	1	1	1	1	1	1	1	1	1	1	1	1	1	1	1	1	3.8	3.8	3.8	29.116	264	264	1	10
P99027;A0A5F8MPY2	P99027;A0A5F8MPY2	8;6	8;6	8;6	60S acidic ribosomal protein P2	Rplp2	sp|P99027|RLA2_MOUSE 60S acidic ribosomal protein P2 OS=Mus musculus OX=10090 GN=Rplp2 PE=1 SV=3;tr|A0A5F8MPY2|A0A5F8MPY2_MOUSE 60S acidic ribosomal protein P2 OS=Mus musculus OX=10090 GN=Rplp2-ps1 PE=3 SV=1	2	8	8	8	7	6	6	7	6	7	8	8	5	8	7	6	6	7	6	7	8	8	5	8	7	6	6	7	6	7	8	8	5	8	80	80	80	11.651	115	115;115	1	125
Q00417	Q00417	2	2	2	Transcription factor 7	Tcf7	sp|Q00417|TCF7_MOUSE Transcription factor 7 OS=Mus musculus OX=10090 GN=Tcf7 PE=1 SV=2	1	2	2	2	0	0	2	0	0	2	2	2	0	0	0	0	2	0	0	2	2	2	0	0	0	0	2	0	0	2	2	2	0	0	8.6	8.6	8.6	45.465	419	419	1	8
Q00420	Q00420	4	3	3	GA-binding protein subunit beta-1	Gabpb1	sp|Q00420|GABP1_MOUSE GA-binding protein subunit beta-1 OS=Mus musculus OX=10090 GN=Gabpb1 PE=1 SV=2	1	4	3	3	1	3	3	2	2	2	3	4	0	3	1	2	2	1	2	1	2	3	0	3	1	2	2	1	2	1	2	3	0	3	10.2	8.4	8.4	41.357	383	383	1	18
Q00422	Q00422	16	16	16	GA-binding protein alpha chain	Gabpa	sp|Q00422|GABPA_MOUSE GA-binding protein alpha chain OS=Mus musculus OX=10090 GN=Gabpa PE=1 SV=2	1	16	16	16	9	12	11	10	11	14	14	13	6	13	9	12	11	10	11	14	14	13	6	13	9	12	11	10	11	14	14	13	6	13	44.1	44.1	44.1	51.344	454	454	1	130
Q00547	Q00547	16	16	16	Hyaluronan mediated motility receptor	Hmmr	sp|Q00547|HMMR_MOUSE Hyaluronan mediated motility receptor OS=Mus musculus OX=10090 GN=Hmmr PE=1 SV=4	1	16	16	16	3	6	2	1	3	10	10	14	5	15	3	6	2	1	3	10	10	14	5	15	3	6	2	1	3	10	10	14	5	15	33.5	33.5	33.5	91.784	794	794	1	70
Q00899;Q3TTC2	Q00899	3;1	3;1	3;1	Transcriptional repressor protein YY1	Yy1	sp|Q00899|TYY1_MOUSE Transcriptional repressor protein YY1 OS=Mus musculus OX=10090 GN=Yy1 PE=1 SV=1	2	3	3	3	2	3	2	2	2	2	2	2	0	3	2	3	2	2	2	2	2	2	0	3	2	3	2	2	2	2	2	2	0	3	10.6	10.6	10.6	44.716	414	414;378	1	20
Q00PI9;REV__Q9JJX6	Q00PI9	34;1	34;1	34;1	Heterogeneous nuclear ribonucleoprotein U-like protein 2	Hnrnpul2	sp|Q00PI9|HNRL2_MOUSE Heterogeneous nuclear ribonucleoprotein U-like protein 2 OS=Mus musculus OX=10090 GN=Hnrnpul2 PE=1 SV=2	2	34	34	34	17	23	25	18	14	31	27	29	15	29	17	23	25	18	14	31	27	29	15	29	17	23	25	18	14	31	27	29	15	29	42.7	42.7	42.7	84.939	745	745;388	1	292
Q01147	Q01147	4	4	2	Cyclic AMP-responsive element-binding protein 1	Creb1	sp|Q01147|CREB1_MOUSE Cyclic AMP-responsive element-binding protein 1 OS=Mus musculus OX=10090 GN=Creb1 PE=1 SV=2	1	4	4	2	4	4	4	4	4	3	4	3	2	2	4	4	4	4	4	3	4	3	2	2	2	2	2	2	2	2	2	2	2	1	18.3	18.3	13.5	35.122	327	327	1	34
Q01320	Q01320	68	68	55	DNA topoisomerase 2-alpha	Top2a	sp|Q01320|TOP2A_MOUSE DNA topoisomerase 2-alpha OS=Mus musculus OX=10090 GN=Top2a PE=1 SV=2	1	68	68	55	45	57	47	39	50	64	59	60	42	57	45	57	47	39	50	64	59	60	42	57	36	44	37	31	39	52	47	47	33	45	51.4	51.4	44.2	172.79	1528	1528	1	615
Q01405	Q01405	16	14	14	Protein transport protein Sec23A	Sec23a	sp|Q01405|SC23A_MOUSE Protein transport protein Sec23A OS=Mus musculus OX=10090 GN=Sec23a PE=1 SV=2	1	16	14	14	6	9	7	6	5	13	10	13	5	15	5	7	6	6	5	12	9	11	4	13	5	7	6	6	5	12	9	11	4	13	28.9	26.4	26.4	86.161	765	765	1	80
Q01730	Q01730	9	9	9	Ras suppressor protein 1	Rsu1	sp|Q01730|RSU1_MOUSE Ras suppressor protein 1 OS=Mus musculus OX=10090 GN=Rsu1 PE=1 SV=3	1	9	9	9	5	5	4	1	3	6	5	8	5	7	5	5	4	1	3	6	5	8	5	7	5	5	4	1	3	6	5	8	5	7	36.8	36.8	36.8	31.55	277	277	1	50
Q01768;P15532	Q01768;P15532	3;2	3;2	3;2	Nucleoside diphosphate kinase B;Nucleoside diphosphate kinase A	Nme2;Nme1	sp|Q01768|NDKB_MOUSE Nucleoside diphosphate kinase B OS=Mus musculus OX=10090 GN=Nme2 PE=1 SV=1;sp|P15532|NDKA_MOUSE Nucleoside diphosphate kinase A OS=Mus musculus OX=10090 GN=Nme1 PE=1 SV=1	2	3	3	3	2	1	1	1	2	2	3	2	1	3	2	1	1	1	2	2	3	2	1	3	2	1	1	1	2	2	3	2	1	3	22.4	22.4	22.4	17.363	152	152;152	1	24
Q01853	Q01853	52	52	52	Transitional endoplasmic reticulum ATPase	Vcp	sp|Q01853|TERA_MOUSE Transitional endoplasmic reticulum ATPase OS=Mus musculus OX=10090 GN=Vcp PE=1 SV=4	1	52	52	52	32	40	41	37	37	36	38	41	28	48	32	40	41	37	37	36	38	41	28	48	32	40	41	37	37	36	38	41	28	48	73.3	73.3	73.3	89.321	806	806	1	545
Q02053;P31254	Q02053	27;6	27;6	26;5	Ubiquitin-like modifier-activating enzyme 1	Uba1	sp|Q02053|UBA1_MOUSE Ubiquitin-like modifier-activating enzyme 1 OS=Mus musculus OX=10090 GN=Uba1 PE=1 SV=1	2	27	27	26	4	17	5	4	3	13	16	21	8	25	4	17	5	4	3	13	16	21	8	25	4	16	5	4	3	13	16	21	8	25	36.7	36.7	36.2	117.81	1058	1058;1058	1	130
Q02257;Q02248	Q02257	26;3	26;3	26;3	Junction plakoglobin	Jup	sp|Q02257|PLAK_MOUSE Junction plakoglobin OS=Mus musculus OX=10090 GN=Jup PE=1 SV=3	2	26	26	26	10	1	0	4	25	10	14	2	6	19	10	1	0	4	25	10	14	2	6	19	10	1	0	4	25	10	14	2	6	19	43	43	43	81.8	745	745;781	1	107
Q02614	Q02614	5	5	5	SAP30-binding protein	Sap30bp	sp|Q02614|S30BP_MOUSE SAP30-binding protein OS=Mus musculus OX=10090 GN=Sap30bp PE=1 SV=2	1	5	5	5	1	3	3	2	2	5	2	3	2	5	1	3	3	2	2	5	2	3	2	5	1	3	3	2	2	5	2	3	2	5	23.1	23.1	23.1	33.832	308	308	1	31
Q02819	Q02819	12	12	12	Nucleobindin-1	Nucb1	sp|Q02819|NUCB1_MOUSE Nucleobindin-1 OS=Mus musculus OX=10090 GN=Nucb1 PE=1 SV=2	1	12	12	12	8	11	10	6	11	8	11	10	4	8	8	11	10	6	11	8	11	10	4	8	8	11	10	6	11	8	11	10	4	8	30.5	30.5	30.5	53.408	459	459	1	96
Q03147	Q03147	2	2	2	Cyclin-dependent kinase 7	Cdk7	sp|Q03147|CDK7_MOUSE Cyclin-dependent kinase 7 OS=Mus musculus OX=10090 GN=Cdk7 PE=1 SV=2	1	2	2	2	1	0	0	0	0	1	0	0	0	2	1	0	0	0	0	1	0	0	0	2	1	0	0	0	0	1	0	0	0	2	13.3	13.3	13.3	38.968	346	346	1	4
Q03173	Q03173	25	25	23	Protein enabled homolog	Enah	sp|Q03173|ENAH_MOUSE Protein enabled homolog OS=Mus musculus OX=10090 GN=Enah PE=1 SV=2	1	25	25	23	13	19	17	17	17	20	19	22	7	23	13	19	17	17	17	20	19	22	7	23	13	17	16	17	15	19	18	20	7	22	32.5	32.5	30.7	85.843	802	802	1	225
Q03265;REV__P54729	Q03265	23;1	23;1	22;0	ATP synthase subunit alpha, mitochondrial	Atp5a1	sp|Q03265|ATPA_MOUSE ATP synthase subunit alpha, mitochondrial OS=Mus musculus OX=10090 GN=Atp5f1a PE=1 SV=1	2	23	23	22	16	19	22	18	17	6	5	5	3	5	16	19	22	18	17	6	5	5	3	5	15	18	21	17	16	6	5	5	3	5	46.8	46.8	45.8	59.752	553	553;614	1	124
Q03350	Q03350	1	1	1	Thrombospondin-2	Thbs2	sp|Q03350|TSP2_MOUSE Thrombospondin-2 OS=Mus musculus OX=10090 GN=Thbs2 PE=1 SV=2	1	1	1	1	1	0	1	1	1	0	1	0	1	1	1	0	1	1	1	0	1	0	1	1	1	0	1	1	1	0	1	0	1	1	1.2	1.2	1.2	129.88	1172	1172	1	7
Q03958	Q03958	6	6	6	Prefoldin subunit 6	Pfdn6	sp|Q03958|PFD6_MOUSE Prefoldin subunit 6 OS=Mus musculus OX=10090 GN=Pfdn6 PE=1 SV=1	1	6	6	6	2	4	0	1	1	5	4	5	1	6	2	4	0	1	1	5	4	5	1	6	2	4	0	1	1	5	4	5	1	6	48.8	48.8	48.8	14.454	127	127	1	32
Q03963	Q03963	3	3	3	Interferon-induced, double-stranded RNA-activated protein kinase	Eif2ak2	sp|Q03963|E2AK2_MOUSE Interferon-induced, double-stranded RNA-activated protein kinase OS=Mus musculus OX=10090 GN=Eif2ak2 PE=1 SV=2	1	3	3	3	0	0	2	2	1	2	1	2	2	2	0	0	2	2	1	2	1	2	2	2	0	0	2	2	1	2	1	2	2	2	8.5	8.5	8.5	58.279	515	515	1	14
Q04692	Q04692	2	2	2	SWI/SNF-related matrix-associated actin-dependent regulator of chromatin subfamily A containing DEAD/H box 1	Smarcad1	sp|Q04692|SMRCD_MOUSE SWI/SNF-related matrix-associated actin-dependent regulator of chromatin subfamily A containing DEAD/H box 1 OS=Mus musculus OX=10090 GN=Smarcad1 PE=1 SV=2	1	2	2	2	0	1	0	0	0	2	1	0	0	1	0	1	0	0	0	2	1	0	0	1	0	1	0	0	0	2	1	0	0	1	2.5	2.5	2.5	116.45	1021	1021	1	5
Q04750;Q8R4U6	Q04750	48;3	48;3	48;3	DNA topoisomerase 1	Top1	sp|Q04750|TOP1_MOUSE DNA topoisomerase 1 OS=Mus musculus OX=10090 GN=Top1 PE=1 SV=2	2	48	48	48	33	38	32	32	33	38	40	43	30	44	33	38	32	32	33	38	40	43	30	44	33	38	32	32	33	38	40	43	30	44	56.3	56.3	56.3	90.875	767	767;593	1	478
Q04841	Q04841	7	7	7	DNA-3-methyladenine glycosylase	Mpg	sp|Q04841|3MG_MOUSE DNA-3-methyladenine glycosylase OS=Mus musculus OX=10090 GN=Mpg PE=2 SV=3	1	7	7	7	5	6	5	4	5	5	5	5	3	6	5	6	5	4	5	5	5	5	3	6	5	6	5	4	5	5	5	5	3	6	28.8	28.8	28.8	36.471	333	333	1	49
Q05186	Q05186	10	10	10	Reticulocalbin-1	Rcn1	sp|Q05186|RCN1_MOUSE Reticulocalbin-1 OS=Mus musculus OX=10090 GN=Rcn1 PE=1 SV=1	1	10	10	10	5	6	6	7	5	6	7	7	7	8	5	6	6	7	5	6	7	7	7	8	5	6	6	7	5	6	7	7	7	8	42.2	42.2	42.2	38.113	325	325	1	73
Q05512;Q8CIP4;Q03141;Q8VHJ5	Q05512;Q8CIP4;Q03141;Q8VHJ5	2;1;1;1	2;1;1;1	2;1;1;1	Serine/threonine-protein kinase MARK2;MAP/microtubule affinity-regulating kinase 4;MAP/microtubule affinity-regulating kinase 3;Serine/threonine-protein kinase MARK1	Mark2;Mark4;Mark3;Mark1	sp|Q05512|MARK2_MOUSE Serine/threonine-protein kinase MARK2 OS=Mus musculus OX=10090 GN=Mark2 PE=1 SV=3;sp|Q8CIP4|MARK4_MOUSE MAP/microtubule affinity-regulating kinase 4 OS=Mus musculus OX=10090 GN=Mark4 PE=1 SV=1;sp|Q03141|MARK3_MOUSE MAP/microtubule aff	4	2	2	2	1	0	1	1	1	1	1	0	1	1	1	0	1	1	1	1	1	0	1	1	1	0	1	1	1	1	1	0	1	1	3.7	3.7	3.7	86.305	776	776;752;753;795	1	8
Q05816	Q05816	3	3	3	Fatty acid-binding protein, epidermal	Fabp5	sp|Q05816|FABP5_MOUSE Fatty acid-binding protein 5 OS=Mus musculus OX=10090 GN=Fabp5 PE=1 SV=3	1	3	3	3	0	0	0	1	1	0	1	0	0	2	0	0	0	1	1	0	1	0	0	2	0	0	0	1	1	0	1	0	0	2	28.9	28.9	28.9	15.137	135	135	1	6
Q05920	Q05920	12	12	12	Pyruvate carboxylase, mitochondrial	Pc	sp|Q05920|PYC_MOUSE Pyruvate carboxylase, mitochondrial OS=Mus musculus OX=10090 GN=Pc PE=1 SV=1	1	12	12	12	6	10	5	5	4	2	3	5	2	5	6	10	5	5	4	2	3	5	2	5	6	10	5	5	4	2	3	5	2	5	13.5	13.5	13.5	129.68	1178	1178	1	47
Q05CL8	Q05CL8	24	24	16	La-related protein 7	Larp7	sp|Q05CL8|LARP7_MOUSE La-related protein 7 OS=Mus musculus OX=10090 GN=Larp7 PE=1 SV=2	1	24	24	16	17	21	19	17	20	20	18	23	13	22	17	21	19	17	20	20	18	23	13	22	11	13	13	11	13	13	12	15	11	14	40	40	25.3	64.802	570	570	1	235
Q05D44	Q05D44	32	32	32	Eukaryotic translation initiation factor 5B	Eif5b	sp|Q05D44|IF2P_MOUSE Eukaryotic translation initiation factor 5B OS=Mus musculus OX=10090 GN=Eif5b PE=1 SV=2	1	32	32	32	25	25	26	26	25	27	24	29	22	26	25	25	26	26	25	27	24	29	22	26	25	25	26	26	25	27	24	29	22	26	30.6	30.6	30.6	137.61	1216	1216	1	320
Q06138	Q06138	4	4	3	Calcium-binding protein 39	Cab39	sp|Q06138|CAB39_MOUSE Calcium-binding protein 39 OS=Mus musculus OX=10090 GN=Cab39 PE=1 SV=2	1	4	4	3	1	1	1	1	0	2	1	2	1	4	1	1	1	1	0	2	1	2	1	4	1	1	1	1	0	1	0	1	1	3	10.6	10.6	7.9	39.842	341	341	1	14
Q07139	Q07139	1	1	1	Protein ECT2	Ect2	sp|Q07139|ECT2_MOUSE Protein ECT2 OS=Mus musculus OX=10090 GN=Ect2 PE=1 SV=2	1	1	1	1	0	0	0	0	0	1	1	1	0	1	0	0	0	0	0	1	1	1	0	1	0	0	0	0	0	1	1	1	0	1	1.4	1.4	1.4	103.13	913	913	1	4
Q07231	Q07231	16	16	16	Zinc finger and SCAN domain-containing protein 21	Zscan21	sp|Q07231|ZSC21_MOUSE Zinc finger and SCAN domain-containing protein 21 OS=Mus musculus OX=10090 GN=Zscan21 PE=2 SV=2	1	16	16	16	11	13	13	8	10	14	13	13	3	13	11	13	13	8	10	14	13	13	3	13	11	13	13	8	10	14	13	13	3	13	31.5	31.5	31.5	63.012	555	555	1	126
Q07646	Q07646	6	6	6	Mesoderm-specific transcript protein	Mest	sp|Q07646|MEST_MOUSE Mesoderm-specific transcript protein OS=Mus musculus OX=10090 GN=Mest PE=2 SV=1	1	6	6	6	6	6	5	6	5	4	4	4	2	3	6	6	5	6	5	4	4	4	2	3	6	6	5	6	5	4	4	4	2	3	28.7	28.7	28.7	38.907	335	335	1	52
Q07813	Q07813	1	1	1	Apoptosis regulator BAX	Bax	sp|Q07813|BAX_MOUSE Apoptosis regulator BAX OS=Mus musculus OX=10090 GN=Bax PE=1 SV=1	1	1	1	1	0	1	1	0	1	1	0	1	0	1	0	1	1	0	1	1	0	1	0	1	0	1	1	0	1	1	0	1	0	1	6.8	6.8	6.8	21.394	192	192	1	6
Q07832	Q07832	4	4	4	Serine/threonine-protein kinase PLK1	Plk1	sp|Q07832|PLK1_MOUSE Serine/threonine-protein kinase PLK1 OS=Mus musculus OX=10090 GN=Plk1 PE=1 SV=2	1	4	4	4	1	0	0	0	0	3	2	2	0	4	1	0	0	0	0	3	2	2	0	4	1	0	0	0	0	3	2	2	0	4	9.1	9.1	9.1	68.3	603	603	1	12
Q08093	Q08093	4	3	3	Calponin-2	Cnn2	sp|Q08093|CNN2_MOUSE Calponin-2 OS=Mus musculus OX=10090 GN=Cnn2 PE=1 SV=1	1	4	3	3	2	3	3	2	1	2	2	2	1	3	2	2	2	1	0	1	1	1	0	2	2	2	2	1	0	1	1	1	0	2	17	13.4	13.4	33.155	305	305	1	12
Q08122;Q9WVB2;Q62440;Q62441	Q08122	5;1;1;1	5;1;1;1	5;1;1;1	Transducin-like enhancer protein 3	Tle3	sp|Q08122|TLE3_MOUSE Transducin-like enhancer protein 3 OS=Mus musculus OX=10090 GN=Tle3 PE=1 SV=3	4	5	5	5	2	2	2	0	2	5	3	5	0	3	2	2	2	0	2	5	3	5	0	3	2	2	2	0	2	5	3	5	0	3	7.4	7.4	7.4	83.446	772	772;767;770;773	1	24
Q08189	Q08189	1	1	1	Protein-glutamine gamma-glutamyltransferase E;Protein-glutamine gamma-glutamyltransferase E 50 kDa catalytic chain;Protein-glutamine gamma-glutamyltransferase E 27 kDa non-catalytic chain	Tgm3	sp|Q08189|TGM3_MOUSE Protein-glutamine gamma-glutamyltransferase E OS=Mus musculus OX=10090 GN=Tgm3 PE=1 SV=2	1	1	1	1	0	1	0	0	1	0	1	0	1	1	0	1	0	0	1	0	1	0	1	1	0	1	0	0	1	0	1	0	1	1	1.9	1.9	1.9	77.308	693	693	1	5
Q08288	Q08288	20	20	20	Cell growth-regulating nucleolar protein	Lyar	sp|Q08288|LYAR_MOUSE Cell growth-regulating nucleolar protein OS=Mus musculus OX=10090 GN=Lyar PE=1 SV=2	1	20	20	20	10	12	12	13	12	18	16	18	9	18	10	12	12	13	12	18	16	18	9	18	10	12	12	13	12	18	16	18	9	18	51.3	51.3	51.3	43.735	388	388	1	177
Q08376	Q08376	1	1	1	Zinc finger and BTB domain-containing protein 14	Zbtb14	sp|Q08376|ZBT14_MOUSE Zinc finger and BTB domain-containing protein 14 OS=Mus musculus OX=10090 GN=Zbtb14 PE=2 SV=1	1	1	1	1	0	0	0	0	0	0	0	0	0	1	0	0	0	0	0	0	0	0	0	1	0	0	0	0	0	0	0	0	0	1	3.8	3.8	3.8	50.899	449	449	1	1
Q08639	Q08639	3	3	3	Transcription factor Dp-1	Tfdp1	sp|Q08639|TFDP1_MOUSE Transcription factor Dp-1 OS=Mus musculus OX=10090 GN=Tfdp1 PE=1 SV=1	1	3	3	3	2	2	3	0	1	2	1	2	0	2	2	2	3	0	1	2	1	2	0	2	2	2	3	0	1	2	1	2	0	2	10	10	10	45.23	410	410	1	17
Q08943	Q08943	9	9	9	FACT complex subunit SSRP1	Ssrp1	sp|Q08943|SSRP1_MOUSE FACT complex subunit SSRP1 OS=Mus musculus OX=10090 GN=Ssrp1 PE=1 SV=2	1	9	9	9	0	2	0	0	2	7	4	5	2	6	0	2	0	0	2	7	4	5	2	6	0	2	0	0	2	7	4	5	2	6	15.3	15.3	15.3	80.859	708	708	1	28
Q09XV5	Q09XV5	14	9	9	Chromodomain-helicase-DNA-binding protein 8	Chd8	sp|Q09XV5|CHD8_MOUSE Chromodomain-helicase-DNA-binding protein 8 OS=Mus musculus OX=10090 GN=Chd8 PE=1 SV=1	1	14	9	9	4	7	4	4	3	11	8	6	3	12	2	4	1	1	0	7	5	3	2	9	2	4	1	1	0	7	5	3	2	9	8.2	6.3	6.3	290.84	2582	2582	1	34
Q0P5V2	Q0P5V2	1	1	1	Sine oculis-binding protein homolog	Sobp	sp|Q0P5V2|SOBP_MOUSE Sine oculis-binding protein homolog OS=Mus musculus OX=10090 GN=Sobp PE=1 SV=1	1	1	1	1	0	0	1	0	1	0	1	1	0	1	0	0	1	0	1	0	1	1	0	1	0	0	1	0	1	0	1	1	0	1	1.2	1.2	1.2	91.783	864	864	1	5
Q0P678;REV__Q0P678	Q0P678	16;1	16;1	16;1	Zinc finger CCCH domain-containing protein 18	Zc3h18	sp|Q0P678|ZCH18_MOUSE Zinc finger CCCH domain-containing protein 18 OS=Mus musculus OX=10090 GN=Zc3h18 PE=1 SV=1	2	16	16	16	7	5	8	4	7	11	10	12	7	15	7	5	8	4	7	11	10	12	7	15	7	5	8	4	7	11	10	12	7	15	21.9	21.9	21.9	105.69	948	948;948	1	87
Q0VBL3;Q6PHZ5;Q8BKT2;Q9D952	Q0VBL3	18;2;1;1	18;2;1;1	18;2;1;1		Rbm15	sp|Q0VBL3|RBM15_MOUSE RNA-binding protein 15 OS=Mus musculus OX=10090 GN=Rbm15 PE=1 SV=1	4	18	18	18	11	15	13	10	11	17	10	15	4	16	11	15	13	10	11	17	10	15	4	16	11	15	13	10	11	17	10	15	4	16	27.4	27.4	27.4	105.72	962	962;887;225;2035	1	124
Q0VGY8	Q0VGY8	12	12	12	Protein TANC1	Tanc1	sp|Q0VGY8|TANC1_MOUSE Protein TANC1 OS=Mus musculus OX=10090 GN=Tanc1 PE=1 SV=2	1	12	12	12	2	4	2	1	2	10	6	6	2	11	2	4	2	1	2	10	6	6	2	11	2	4	2	1	2	10	6	6	2	11	10.3	10.3	10.3	200.8	1856	1856	1	47
Q0ZLH2	Q0ZLH2	1	1	1	Pejvakin	Pjvk	sp|Q0ZLH2|PJVK_MOUSE Pejvakin OS=Mus musculus OX=10090 GN=Pjvk PE=1 SV=1	1	1	1	1	0	1	1	0	0	1	1	1	0	1	0	1	1	0	0	1	1	1	0	1	0	1	1	0	0	1	1	1	0	1	4.3	4.3	4.3	39.858	352	352	1	6
Q14AI0	Q14AI0	2	2	2	Sister chromatid cohesion protein DCC1	DSCC1	sp|Q14AI0|DCC1_MOUSE Sister chromatid cohesion protein DCC1 OS=Mus musculus OX=10090 GN=DSCC1 PE=2 SV=1	1	2	2	2	0	1	0	1	0	1	0	1	0	2	0	1	0	1	0	1	0	1	0	2	0	1	0	1	0	1	0	1	0	2	5.3	5.3	5.3	45.521	399	399	1	6
Q14AX6;P49615;Q64261;Q3V3A1;Q04899;O35495;Q04735;Q8K0D0	Q14AX6	7;1;1;1;1;1;1;1	6;0;0;0;0;0;0;0	5;0;0;0;0;0;0;0	Cyclin-dependent kinase 12	Cdk12	sp|Q14AX6|CDK12_MOUSE Cyclin-dependent kinase 12 OS=Mus musculus OX=10090 GN=Cdk12 PE=1 SV=2	8	7	6	5	3	5	5	3	3	6	5	5	2	6	2	4	4	2	2	5	4	4	1	5	1	3	3	2	2	4	3	3	1	4	7.7	7.1	6	163.68	1484	1484;292;326;433;451;469;496;523	1	35
Q14B71	Q14B71	4	4	4	Cell division cycle-associated protein 2	Cdca2	sp|Q14B71|CDCA2_MOUSE Cell division cycle-associated protein 2 OS=Mus musculus OX=10090 GN=Cdca2 PE=1 SV=2	1	4	4	4	2	1	0	0	0	3	3	1	0	1	2	1	0	0	0	3	3	1	0	1	2	1	0	0	0	3	3	1	0	1	5.7	5.7	5.7	106.36	982	982	1	11
Q1HFZ0	Q1HFZ0	21	21	21	tRNA (cytosine(34)-C(5))-methyltransferase	Nsun2	sp|Q1HFZ0|NSUN2_MOUSE RNA cytosine C(5)-methyltransferase NSUN2 OS=Mus musculus OX=10090 GN=Nsun2 PE=1 SV=2	1	21	21	21	12	15	8	5	4	7	13	16	5	14	12	15	8	5	4	7	13	16	5	14	12	15	8	5	4	7	13	16	5	14	39.4	39.4	39.4	85.451	757	757	1	101
Q2KN98	Q2KN98	30	30	30	Cytospin-A	Specc1l	sp|Q2KN98|CYTSA_MOUSE Cytospin-A OS=Mus musculus OX=10090 GN=Specc1l PE=1 SV=1	1	30	30	30	20	22	23	20	23	27	24	24	15	22	20	22	23	20	23	27	24	24	15	22	20	22	23	20	23	27	24	24	15	22	36.1	36.1	36.1	124.49	1118	1118	1	235
Q2NL51	Q2NL51	3	3	3	Glycogen synthase kinase-3 alpha	Gsk3a	sp|Q2NL51|GSK3A_MOUSE Glycogen synthase kinase-3 alpha OS=Mus musculus OX=10090 GN=Gsk3a PE=1 SV=2	1	3	3	3	1	1	0	0	0	3	1	1	1	3	1	1	0	0	0	3	1	1	1	3	1	1	0	0	0	3	1	1	1	3	8.2	8.2	8.2	51.66	490	490	1	11
Q2TPA8	Q2TPA8	2	2	2	Hydroxysteroid dehydrogenase-like protein 2	Hsdl2	sp|Q2TPA8|HSDL2_MOUSE Hydroxysteroid dehydrogenase-like protein 2 OS=Mus musculus OX=10090 GN=Hsdl2 PE=1 SV=1	1	2	2	2	1	2	2	2	2	2	1	2	0	0	1	2	2	2	2	2	1	2	0	0	1	2	2	2	2	2	1	2	0	0	4.9	4.9	4.9	54.208	490	490	1	14
Q2YDW2	Q2YDW2	4	4	4	Protein misato homolog 1	Msto1	sp|Q2YDW2|MSTO1_MOUSE Protein misato homolog 1 OS=Mus musculus OX=10090 GN=Msto1 PE=1 SV=1	1	4	4	4	2	2	2	3	2	3	1	2	0	3	2	2	2	3	2	3	1	2	0	3	2	2	2	3	2	3	1	2	0	3	8.3	8.3	8.3	61.23	556	556	1	20
Q3B7Z2;Q5QNQ6	Q3B7Z2	12;1	12;1	12;1	Oxysterol-binding protein 1	Osbp	sp|Q3B7Z2|OSBP1_MOUSE Oxysterol-binding protein 1 OS=Mus musculus OX=10090 GN=Osbp PE=1 SV=3	2	12	12	12	6	8	7	5	5	10	6	11	1	10	6	8	7	5	5	10	6	11	1	10	6	8	7	5	5	10	6	11	1	10	21.2	21.2	21.2	88.796	805	805;908	1	71
Q3TAQ9	Q3TAQ9	11	11	11		Wdr36	tr|Q3TAQ9|Q3TAQ9_MOUSE WD repeat domain 36 OS=Mus musculus OX=10090 GN=Wdr36 PE=1 SV=1	1	11	11	11	8	9	7	7	4	5	2	5	1	7	8	9	7	7	4	5	2	5	1	7	8	9	7	7	4	5	2	5	1	7	17.7	17.7	17.7	99.719	899	899	1	56
Q3TC46	Q3TC46	4	4	4	Protein PAT1 homolog 1	Patl1	sp|Q3TC46|PATL1_MOUSE Protein PAT1 homolog 1 OS=Mus musculus OX=10090 GN=Patl1 PE=1 SV=2	1	4	4	4	2	2	4	2	3	4	4	3	0	4	2	2	4	2	3	4	4	3	0	4	2	2	4	2	3	4	4	3	0	4	8.8	8.8	8.8	86.769	770	770	1	28
Q3TCX3	Q3TCX3	15	15	15	UPF0469 protein KIAA0907	Kiaa0907	sp|Q3TCX3|KHDC4_MOUSE KH homology domain-containing protein 4 OS=Mus musculus OX=10090 GN=Khdc4 PE=1 SV=1	1	15	15	15	9	11	10	9	7	14	14	14	4	13	9	11	10	9	7	14	14	14	4	13	9	11	10	9	7	14	14	14	4	13	40.4	40.4	40.4	64.562	612	612	1	123
Q3TDD9	Q3TDD9	1	1	1	Protein phosphatase 1 regulatory subunit 21	Ppp1r21	sp|Q3TDD9|PPR21_MOUSE Protein phosphatase 1 regulatory subunit 21 OS=Mus musculus OX=10090 GN=Ppp1r21 PE=1 SV=2	1	1	1	1	0	0	0	0	0	0	1	1	0	1	0	0	0	0	0	0	1	1	0	1	0	0	0	0	0	0	1	1	0	1	1.9	1.9	1.9	88.337	780	780	1	3
Q3TDE8	Q3TDE8	3	3	3	Zinc finger protein 691	Znf691	sp|Q3TDE8|ZN691_MOUSE Zinc finger protein 691 OS=Mus musculus OX=10090 GN=Znf691 PE=2 SV=1	1	3	3	3	2	3	3	1	1	3	1	1	0	1	2	3	3	1	1	3	1	1	0	1	2	3	3	1	1	3	1	1	0	1	9.5	9.5	9.5	32.198	283	283	1	16
Q3TDN2	Q3TDN2	2	2	2	FAS-associated factor 2	Faf2	sp|Q3TDN2|FAF2_MOUSE FAS-associated factor 2 OS=Mus musculus OX=10090 GN=Faf2 PE=1 SV=2	1	2	2	2	1	1	1	0	1	1	1	1	0	1	1	1	1	0	1	1	1	1	0	1	1	1	1	0	1	1	1	1	0	1	6.1	6.1	6.1	52.471	445	445	1	8
Q3TDQ1	Q3TDQ1	7	7	6	Dolichyl-diphosphooligosaccharide--protein glycosyltransferase subunit STT3B	Stt3b	sp|Q3TDQ1|STT3B_MOUSE Dolichyl-diphosphooligosaccharide--protein glycosyltransferase subunit STT3B OS=Mus musculus OX=10090 GN=Stt3b PE=1 SV=2	1	7	7	6	7	7	6	5	5	0	1	0	1	0	7	7	6	5	5	0	1	0	1	0	6	6	5	4	4	0	1	0	0	0	8.3	8.3	7.4	93.245	823	823	1	32
Q3TEA8	Q3TEA8	8	8	8	Heterochromatin protein 1-binding protein 3	Hp1bp3	sp|Q3TEA8|HP1B3_MOUSE Heterochromatin protein 1-binding protein 3 OS=Mus musculus OX=10090 GN=Hp1bp3 PE=1 SV=1	1	8	8	8	2	4	3	4	2	6	5	5	3	5	2	4	3	4	2	6	5	5	3	5	2	4	3	4	2	6	5	5	3	5	19.7	19.7	19.7	60.866	554	554	1	39
Q3TFK5	Q3TFK5	3	3	3	G patch domain-containing protein 4	Gpatch4	sp|Q3TFK5|GPTC4_MOUSE G patch domain-containing protein 4 OS=Mus musculus OX=10090 GN=Gpatch4 PE=1 SV=1	1	3	3	3	2	2	3	2	1	3	3	3	1	3	2	2	3	2	1	3	3	3	1	3	2	2	3	2	1	3	3	3	1	3	9.9	9.9	9.9	46.553	415	415	1	23
Q3THE2;Q9CQ19	Q3THE2;Q9CQ19	6;3	6;3	6;3	Myosin regulatory light chain 12B;Myosin regulatory light polypeptide 9	Myl12b;Myl9	sp|Q3THE2|ML12B_MOUSE Myosin regulatory light chain 12B OS=Mus musculus OX=10090 GN=Myl12b PE=1 SV=2;sp|Q9CQ19|MYL9_MOUSE Myosin regulatory light polypeptide 9 OS=Mus musculus OX=10090 GN=Myl9 PE=1 SV=3	2	6	6	6	2	4	3	3	4	4	6	5	5	5	2	4	3	3	4	4	6	5	5	5	2	4	3	3	4	4	6	5	5	5	33.7	33.7	33.7	19.779	172	172;172	1	42
Q3THK3	Q3THK3	10	10	10	General transcription factor IIF subunit 1	Gtf2f1	sp|Q3THK3|T2FA_MOUSE General transcription factor IIF subunit 1 OS=Mus musculus OX=10090 GN=Gtf2f1 PE=1 SV=2	1	10	10	10	7	6	7	6	5	9	6	9	4	7	7	6	7	6	5	9	6	9	4	7	7	6	7	6	5	9	6	9	4	7	26.2	26.2	26.2	57.241	508	508	1	72
Q3THK7	Q3THK7	12	12	12	GMP synthase [glutamine-hydrolyzing]	Gmps	sp|Q3THK7|GUAA_MOUSE GMP synthase [glutamine-hydrolyzing] OS=Mus musculus OX=10090 GN=Gmps PE=1 SV=2	1	12	12	12	1	8	4	0	0	5	6	10	1	12	1	8	4	0	0	5	6	10	1	12	1	8	4	0	0	5	6	10	1	12	31.7	31.7	31.7	76.723	693	693	1	51
Q3TIV5	Q3TIV5	12	12	12	Zinc finger CCCH domain-containing protein 15	Zc3h15	sp|Q3TIV5|ZC3HF_MOUSE Zinc finger CCCH domain-containing protein 15 OS=Mus musculus OX=10090 GN=Zc3h15 PE=1 SV=2	1	12	12	12	9	9	9	7	6	7	11	11	5	11	9	9	9	7	6	7	11	11	5	11	9	9	9	7	6	7	11	11	5	11	29.6	29.6	29.6	48.327	426	426	1	92
Q3TIX6	Q3TIX6	29	28	28		Fubp3	tr|Q3TIX6|Q3TIX6_MOUSE Far upstream element (FUSE)-binding protein 3 OS=Mus musculus OX=10090 GN=Fubp3 PE=1 SV=1	1	29	28	28	22	27	24	23	21	27	29	28	13	29	22	26	24	23	21	27	28	27	13	28	22	26	24	23	21	27	28	27	13	28	57.2	55.8	55.8	61.959	575	575	1	296
Q3TIX9	Q3TIX9	17	17	17	U4/U6.U5 tri-snRNP-associated protein 2	Usp39	sp|Q3TIX9|SNUT2_MOUSE U4/U6.U5 tri-snRNP-associated protein 2 OS=Mus musculus OX=10090 GN=Usp39 PE=1 SV=2	1	17	17	17	12	12	16	12	13	16	15	15	12	14	12	12	16	12	13	16	15	15	12	14	12	12	16	12	13	16	15	15	12	14	39	39	39	65.146	564	564	1	183
Q3TJZ6	Q3TJZ6	9	7	7	Protein FAM98A	Fam98a	sp|Q3TJZ6|FA98A_MOUSE Protein FAM98A OS=Mus musculus OX=10090 GN=Fam98a PE=1 SV=1	1	9	7	7	3	4	4	1	4	7	6	7	1	9	3	2	3	0	2	5	4	5	0	7	3	2	3	0	2	5	4	5	0	7	27.2	20.8	20.8	55.055	515	515	1	31
Q3TKR3	Q3TKR3	3	3	3	NACHT, LRR and PYD domains-containing protein 4C	Nlrp4c	sp|Q3TKR3|NAL4C_MOUSE NACHT, LRR and PYD domains-containing protein 4C OS=Mus musculus OX=10090 GN=Nlrp4c PE=2 SV=1	1	3	3	3	0	1	0	0	0	1	0	2	0	2	0	1	0	0	0	1	0	2	0	2	0	1	0	0	0	1	0	2	0	2	4.1	4.1	4.1	112.67	982	982	1	6
Q3TKT4;REV__Q9QZS8	Q3TKT4	54;1	54;1	34;0	Transcription activator BRG1	Smarca4	sp|Q3TKT4|SMCA4_MOUSE Transcription activator BRG1 OS=Mus musculus OX=10090 GN=Smarca4 PE=1 SV=1	2	54	54	34	30	37	37	32	29	45	36	43	17	50	30	37	37	32	29	45	36	43	17	50	16	20	22	17	14	26	20	26	8	31	34.2	34.2	23.4	181.43	1613	1613;854	1	417
Q3TKY6	Q3TKY6	11	11	11	Peptidyl-prolyl cis-trans isomerase CWC27 homolog	Cwc27	sp|Q3TKY6|CWC27_MOUSE Spliceosome-associated protein CWC27 homolog OS=Mus musculus OX=10090 GN=Cwc27 PE=1 SV=1	1	11	11	11	5	7	7	7	6	8	9	10	7	8	5	7	7	7	6	8	9	10	7	8	5	7	7	7	6	8	9	10	7	8	31.6	31.6	31.6	53.542	469	469	1	79
Q3TLD5	Q3TLD5	11	11	11	Unconventional prefoldin RPB5 interactor	Uri1	sp|Q3TLD5|RMP_MOUSE Unconventional prefoldin RPB5 interactor OS=Mus musculus OX=10090 GN=Uri1 PE=1 SV=2	1	11	11	11	4	5	8	8	6	5	5	7	6	7	4	5	8	8	6	5	5	7	6	7	4	5	8	8	6	5	5	7	6	7	30.9	30.9	30.9	59.083	531	531	1	61
Q3TLH4	Q3TLH4	29	29	28	Protein PRRC2C	Prrc2c	sp|Q3TLH4|PRC2C_MOUSE Protein PRRC2C OS=Mus musculus OX=10090 GN=Prrc2c PE=1 SV=3	1	29	29	28	13	19	15	13	10	24	20	24	14	26	13	19	15	13	10	24	20	24	14	26	13	18	15	12	10	23	19	23	13	25	16.3	16.3	15.9	310.89	2846	2846	1	182
Q3TLP5	Q3TLP5	1	1	1	Enoyl-CoA hydratase domain-containing protein 2, mitochondrial	Echdc2	sp|Q3TLP5|ECHD2_MOUSE Enoyl-CoA hydratase domain-containing protein 2, mitochondrial OS=Mus musculus OX=10090 GN=Echdc2 PE=1 SV=2	1	1	1	1	1	1	1	1	1	1	0	1	0	1	1	1	1	1	1	1	0	1	0	1	1	1	1	1	1	1	0	1	0	1	5.1	5.1	5.1	31.852	296	296	1	8
Q3TLR7	Q3TLR7	2	2	2	Denticleless protein homolog	Dtl	sp|Q3TLR7|DTL_MOUSE Denticleless protein homolog OS=Mus musculus OX=10090 GN=Dtl PE=1 SV=2	1	2	2	2	0	0	0	0	0	1	0	1	0	2	0	0	0	0	0	1	0	1	0	2	0	0	0	0	0	1	0	1	0	2	3.3	3.3	3.3	79.13	729	729	1	4
Q3TMP1	Q3TMP1	20	20	20		Gtf3c3	tr|Q3TMP1|Q3TMP1_MOUSE General transcription factor IIIC, polypeptide 3 OS=Mus musculus OX=10090 GN=Gtf3c3 PE=1 SV=1	1	20	20	20	6	6	8	5	7	16	12	12	3	13	6	6	8	5	7	16	12	12	3	13	6	6	8	5	7	16	12	12	3	13	31.3	31.3	31.3	100.62	882	882	1	88
Q3TN34	Q3TN34	11	11	10	MICAL-like protein 2	Micall2	sp|Q3TN34|MILK2_MOUSE MICAL-like protein 2 OS=Mus musculus OX=10090 GN=Micall2 PE=1 SV=1	1	11	11	10	0	2	0	0	1	6	4	7	2	11	0	2	0	0	1	6	4	7	2	11	0	2	0	0	1	6	4	7	2	10	15.5	15.5	14.4	108.29	1009	1009	1	33
Q3TPX4	Q3TPX4	8	8	8	Exocyst complex component 5	Exoc5	sp|Q3TPX4|EXOC5_MOUSE Exocyst complex component 5 OS=Mus musculus OX=10090 GN=Exoc5 PE=1 SV=2	1	8	8	8	3	4	4	3	3	5	4	5	0	5	3	4	4	3	3	5	4	5	0	5	3	4	4	3	3	5	4	5	0	5	20.1	20.1	20.1	81.737	708	708	1	36
Q3TQI7	Q3TQI7	5	5	5	Uncharacterized protein C9orf78 homolog		sp|Q3TQI7|TLS1_MOUSE Telomere length and silencing protein 1 homolog OS=Mus musculus OX=10090 PE=1 SV=2	1	5	5	5	1	2	2	1	2	3	3	4	1	4	1	2	2	1	2	3	3	4	1	4	1	2	2	1	2	3	3	4	1	4	23.9	23.9	23.9	33.543	289	289	1	25
Q3TRR0	Q3TRR0	5	5	5	Microtubule-associated protein 9	Map9	sp|Q3TRR0|MAP9_MOUSE Microtubule-associated protein 9 OS=Mus musculus OX=10090 GN=Map9 PE=1 SV=2	1	5	5	5	1	3	2	4	3	4	4	3	2	2	1	3	2	4	3	4	4	3	2	2	1	3	2	4	3	4	4	3	2	2	9	9	9	73.51	646	646	1	28
Q3TSG4	Q3TSG4	16	16	16	RNA demethylase ALKBH5	Alkbh5	sp|Q3TSG4|ALKB5_MOUSE RNA demethylase ALKBH5 OS=Mus musculus OX=10090 GN=Alkbh5 PE=1 SV=2	1	16	16	16	10	11	11	8	10	15	13	14	9	12	10	11	11	8	10	15	13	14	9	12	10	11	11	8	10	15	13	14	9	12	49.9	49.9	49.9	44.41	395	395	1	130
Q3TUF7	Q3TUF7	3	3	3	YEATS domain-containing protein 2	Yeats2	sp|Q3TUF7|YETS2_MOUSE YEATS domain-containing protein 2 OS=Mus musculus OX=10090 GN=Yeats2 PE=1 SV=2	1	3	3	3	1	2	0	0	2	3	2	3	0	3	1	2	0	0	2	3	2	3	0	3	1	2	0	0	2	3	2	3	0	3	3.7	3.7	3.7	148.95	1407	1407	1	16
Q3TUU5	Q3TUU5	1	1	1	Testis-expressed sequence 30 protein	Tex30	sp|Q3TUU5|TEX30_MOUSE Testis-expressed protein 30 OS=Mus musculus OX=10090 GN=Tex30 PE=1 SV=1	1	1	1	1	0	1	0	0	0	1	1	1	0	1	0	1	0	0	0	1	1	1	0	1	0	1	0	0	0	1	1	1	0	1	4	4	4	25.263	225	225	1	5
Q3TVI4	Q3TVI4	2	2	2	Protein HEXIM2	Hexim2	sp|Q3TVI4|HEXI2_MOUSE Protein HEXIM2 OS=Mus musculus OX=10090 GN=Hexim2 PE=1 SV=1	1	2	2	2	0	1	0	1	2	1	1	1	1	2	0	1	0	1	2	1	1	1	1	2	0	1	0	1	2	1	1	1	1	2	8.6	8.6	8.6	35.396	313	313	1	10
Q3TWW8	Q3TWW8	17	17	13	Serine/arginine-rich splicing factor 6	Srsf6	sp|Q3TWW8|SRSF6_MOUSE Serine/arginine-rich splicing factor 6 OS=Mus musculus OX=10090 GN=Srsf6 PE=1 SV=1	1	17	17	13	15	15	15	13	13	14	13	13	12	15	15	15	15	13	13	14	13	13	12	15	11	12	11	10	11	11	10	10	9	12	37.2	37.2	30.4	39.025	339	339	1	174
Q3TXS7	Q3TXS7	11	11	11	26S proteasome non-ATPase regulatory subunit 1	Psmd1	sp|Q3TXS7|PSMD1_MOUSE 26S proteasome non-ATPase regulatory subunit 1 OS=Mus musculus OX=10090 GN=Psmd1 PE=1 SV=1	1	11	11	11	2	6	5	2	2	5	3	8	0	9	2	6	5	2	2	5	3	8	0	9	2	6	5	2	2	5	3	8	0	9	17.4	17.4	17.4	105.73	953	953	1	44
Q3TXT3	Q3TXT3	3	3	3	SOSS complex subunit C	Inip	sp|Q3TXT3|SOSSC_MOUSE SOSS complex subunit C OS=Mus musculus OX=10090 GN=Inip PE=3 SV=1	1	3	3	3	3	3	3	2	2	3	3	3	2	3	3	3	3	2	2	3	3	3	2	3	3	3	3	2	2	3	3	3	2	3	50	50	50	11.411	104	104	1	38
Q3TYA6	Q3TYA6	4	4	4	M-phase phosphoprotein 8	Mphosph8	sp|Q3TYA6|MPP8_MOUSE M-phase phosphoprotein 8 OS=Mus musculus OX=10090 GN=Mphosph8 PE=1 SV=1	1	4	4	4	2	2	2	4	2	4	3	4	0	1	2	2	2	4	2	4	3	4	0	1	2	2	2	4	2	4	3	4	0	1	5.1	5.1	5.1	97.466	858	858	1	24
Q3U0J8	Q3U0J8	1	1	1	TBC1 domain family member 2B	Tbc1d2b	sp|Q3U0J8|TBD2B_MOUSE TBC1 domain family member 2B OS=Mus musculus OX=10090 GN=Tbc1d2b PE=1 SV=2	1	1	1	1	1	1	1	1	1	0	1	1	0	1	1	1	1	1	1	0	1	1	0	1	1	1	1	1	1	0	1	1	0	1	1.1	1.1	1.1	109.95	965	965	1	8
Q3U0V1	Q3U0V1	35	35	31	Far upstream element-binding protein 2	Khsrp	sp|Q3U0V1|FUBP2_MOUSE Far upstream element-binding protein 2 OS=Mus musculus OX=10090 GN=Khsrp PE=1 SV=2	1	35	35	31	24	32	26	24	28	31	30	33	19	32	24	32	26	24	28	31	30	33	19	32	22	28	24	22	25	28	26	29	18	28	57.5	57.5	53.3	76.775	748	748	1	357
Q3U0X6	Q3U0X6	4	4	4		Zfp217	tr|Q3U0X6|Q3U0X6_MOUSE Zinc finger protein 217 OS=Mus musculus OX=10090 GN=Zfp217 PE=1 SV=1	1	4	4	4	1	2	0	0	1	4	4	4	1	4	1	2	0	0	1	4	4	4	1	4	1	2	0	0	1	4	4	4	1	4	7.1	7.1	7.1	113.6	1041	1041	1	21
Q3U1J4	Q3U1J4	37	37	37	DNA damage-binding protein 1	Ddb1	sp|Q3U1J4|DDB1_MOUSE DNA damage-binding protein 1 OS=Mus musculus OX=10090 GN=Ddb1 PE=1 SV=2	1	37	37	37	23	30	31	28	22	32	32	36	20	31	23	30	31	28	22	32	32	36	20	31	23	30	31	28	22	32	32	36	20	31	40	40	40	126.85	1140	1140	1	305
Q3U1T3	Q3U1T3	6	6	6	Breast cancer metastasis-suppressor 1-like protein	Brms1l	sp|Q3U1T3|BRM1L_MOUSE Breast cancer metastasis-suppressor 1-like protein OS=Mus musculus OX=10090 GN=Brms1l PE=2 SV=1	1	6	6	6	1	3	3	0	0	5	4	4	1	5	1	3	3	0	0	5	4	4	1	5	1	3	3	0	0	5	4	4	1	5	19.8	19.8	19.8	37.657	323	323	1	26
Q3U2P1	Q3U2P1	3	3	3	Protein transport protein Sec24A	Sec24a	sp|Q3U2P1|SC24A_MOUSE Protein transport protein Sec24A OS=Mus musculus OX=10090 GN=Sec24a PE=1 SV=1	1	3	3	3	1	0	0	0	0	1	0	0	0	3	1	0	0	0	0	1	0	0	0	3	1	0	0	0	0	1	0	0	0	3	5.4	5.4	5.4	118.78	1090	1090	1	5
Q3U319;REV__Q9WVQ0;Q3U5Q7	Q3U319	24;1;1	20;1;1	20;1;1	E3 ubiquitin-protein ligase BRE1B	Rnf40	sp|Q3U319|BRE1B_MOUSE E3 ubiquitin-protein ligase BRE1B OS=Mus musculus OX=10090 GN=Rnf40 PE=1 SV=2	3	24	20	20	10	14	15	12	10	17	17	21	10	20	8	12	13	10	9	16	15	18	9	17	8	12	13	10	9	16	15	18	9	17	26.4	23.3	23.3	113.97	1001	1001;1022;447	1	132
Q3U3C9	Q3U3C9	8	8	8	Genetic suppressor element 1	Gse1	sp|Q3U3C9|GSE1_MOUSE Genetic suppressor element 1 OS=Mus musculus OX=10090 GN=Gse1 PE=1 SV=2	1	8	8	8	3	2	0	0	0	6	5	5	1	7	3	2	0	0	0	6	5	5	1	7	3	2	0	0	0	6	5	5	1	7	11.4	11.4	11.4	136.23	1213	1213	1	30
Q3U3R4	Q3U3R4	3	3	3	Lipase maturation factor 1	Lmf1	sp|Q3U3R4|LMF1_MOUSE Lipase maturation factor 1 OS=Mus musculus OX=10090 GN=Lmf1 PE=1 SV=1	1	3	3	3	1	3	2	2	1	0	0	0	0	0	1	3	2	2	1	0	0	0	0	0	1	3	2	2	1	0	0	0	0	0	8	8	8	65.877	574	574	1	9
Q3U7R1	Q3U7R1	5	5	5	Extended synaptotagmin-1	Esyt1	sp|Q3U7R1|ESYT1_MOUSE Extended synaptotagmin-1 OS=Mus musculus OX=10090 GN=Esyt1 PE=1 SV=2	1	5	5	5	4	5	4	4	4	3	2	1	1	5	4	5	4	4	4	3	2	1	1	5	4	5	4	4	4	3	2	1	1	5	6	6	6	121.55	1092	1092	1	33
Q3U821	Q3U821	4	4	4		Wdr75	sp|Q3U821|WDR75_MOUSE WD repeat-containing protein 75 OS=Mus musculus OX=10090 GN=Wdr75 PE=1 SV=1	1	4	4	4	4	4	3	3	3	3	1	3	0	0	4	4	3	3	3	3	1	3	0	0	4	4	3	3	3	3	1	3	0	0	7.6	7.6	7.6	94.036	830	830	1	24
Q3U9G9	Q3U9G9	5	5	5	Lamin-B receptor	Lbr	sp|Q3U9G9|LBR_MOUSE Delta(14)-sterol reductase LBR OS=Mus musculus OX=10090 GN=Lbr PE=1 SV=2	1	5	5	5	4	5	4	5	5	1	1	2	0	1	4	5	4	5	5	1	1	2	0	1	4	5	4	5	5	1	1	2	0	1	8.3	8.3	8.3	71.439	626	626	1	28
Q3UA16	Q3UA16	4	4	4	Kinetochore protein Spc25	Spc25	sp|Q3UA16|SPC25_MOUSE Kinetochore protein Spc25 OS=Mus musculus OX=10090 GN=Spc25 PE=2 SV=1	1	4	4	4	0	1	1	1	0	1	1	4	0	4	0	1	1	1	0	1	1	4	0	4	0	1	1	1	0	1	1	4	0	4	26.5	26.5	26.5	26.457	226	226	1	14
Q3UA37	Q3UA37	6	6	6	Glutamine-rich protein 1	Qrich1	sp|Q3UA37|QRIC1_MOUSE Glutamine-rich protein 1 OS=Mus musculus OX=10090 GN=Qrich1 PE=1 SV=1	1	6	6	6	3	4	3	2	1	5	4	6	0	6	3	4	3	2	1	5	4	6	0	6	3	4	3	2	1	5	4	6	0	6	12.7	12.7	12.7	86.555	777	777	1	34
Q3UB74	Q3UB74	1	1	1	Transforming growth factor beta regulator 1	Tbrg1	sp|Q3UB74|TBRG1_MOUSE Transforming growth factor beta regulator 1 OS=Mus musculus OX=10090 GN=Tbrg1 PE=1 SV=2	1	1	1	1	0	0	0	0	0	0	0	0	0	1	0	0	0	0	0	0	0	0	0	1	0	0	0	0	0	0	0	0	0	1	2.7	2.7	2.7	44.881	406	406	1	1
Q3UCQ1	Q3UCQ1	11	8	7	Forkhead box protein K2	Foxk2	sp|Q3UCQ1|FOXK2_MOUSE Forkhead box protein K2 OS=Mus musculus OX=10090 GN=Foxk2 PE=1 SV=3	1	11	8	7	2	8	7	7	4	8	9	8	2	7	2	5	6	6	3	7	7	7	2	6	2	5	6	6	3	7	7	7	2	6	21.8	19.5	14.6	68.446	651	651	1	56
Q3UDE2	Q3UDE2	4	4	4	Tubulin--tyrosine ligase-like protein 12	Ttll12	sp|Q3UDE2|TTL12_MOUSE Tubulin--tyrosine ligase-like protein 12 OS=Mus musculus OX=10090 GN=Ttll12 PE=1 SV=1	1	4	4	4	0	2	1	0	0	1	1	2	0	4	0	2	1	0	0	1	1	2	0	4	0	2	1	0	0	1	1	2	0	4	6.7	6.7	6.7	74.042	639	639	1	11
Q3UEB3	Q3UEB3	26	26	26	Poly(U)-binding-splicing factor PUF60	Puf60	sp|Q3UEB3|PUF60_MOUSE Poly(U)-binding-splicing factor PUF60 OS=Mus musculus OX=10090 GN=Puf60 PE=1 SV=2	1	26	26	26	15	20	20	19	19	24	24	23	17	26	15	20	20	19	19	24	24	23	17	26	15	20	20	19	19	24	24	23	17	26	70.2	70.2	70.2	60.248	564	564	1	324
Q3UFS4	Q3UFS4	3	3	3	G patch domain-containing protein 11	Gpatch11	sp|Q3UFS4|GPT11_MOUSE G patch domain-containing protein 11 OS=Mus musculus OX=10090 GN=Gpatch11 PE=1 SV=2	1	3	3	3	3	2	2	2	2	3	2	3	2	2	3	2	2	2	2	3	2	3	2	2	3	2	2	2	2	3	2	3	2	2	9.5	9.5	9.5	30.608	262	262	1	24
Q3UGC7;Q66JS6	Q3UGC7;Q66JS6	10;10	10;10	10;10	Eukaryotic translation initiation factor 3 subunit J-A;Eukaryotic translation initiation factor 3 subunit J-B	Eif3j1;Eif3j2	sp|Q3UGC7|EI3JA_MOUSE Eukaryotic translation initiation factor 3 subunit J-A OS=Mus musculus OX=10090 GN=Eif3j1 PE=2 SV=1;sp|Q66JS6|EI3JB_MOUSE Eukaryotic translation initiation factor 3 subunit J-B OS=Mus musculus OX=10090 GN=Eif3j2 PE=1 SV=1	2	10	10	10	4	6	5	9	9	9	9	8	5	7	4	6	5	9	9	9	9	8	5	7	4	6	5	9	9	9	9	8	5	7	34.5	34.5	34.5	29.343	261	261;263	1	85
Q3UGS4	Q3UGS4	3	3	3	Protein FAM195B	Fam195b	sp|Q3UGS4|MCRI1_MOUSE Mapk-regulated corepressor-interacting protein 1 OS=Mus musculus OX=10090 GN=Mcrip1 PE=1 SV=1	1	3	3	3	1	3	2	2	3	3	3	3	2	3	1	3	2	2	3	3	3	3	2	3	1	3	2	2	3	3	3	3	2	3	46.4	46.4	46.4	11.101	97	97	1	25
Q3UH06	Q3UH06	1	1	1	Ras-responsive element-binding protein 1	Rreb1	sp|Q3UH06|RREB1_MOUSE Ras-responsive element-binding protein 1 OS=Mus musculus OX=10090 GN=Rreb1 PE=1 SV=2	1	1	1	1	1	1	1	1	1	1	1	1	1	1	1	1	1	1	1	1	1	1	1	1	1	1	1	1	1	1	1	1	1	1	0.9	0.9	0.9	184.15	1700	1700	1	19
Q3UH68	Q3UH68	50	50	50	LIM and calponin homology domains-containing protein 1	Limch1	sp|Q3UH68|LIMC1_MOUSE LIM and calponin homology domains-containing protein 1 OS=Mus musculus OX=10090 GN=Limch1 PE=1 SV=2	1	50	50	50	27	35	36	35	35	45	43	43	29	43	27	35	36	35	35	45	43	43	29	43	27	35	36	35	35	45	43	43	29	43	63.1	63.1	63.1	118.19	1057	1057	1	425
Q3UHC0;Q3UHK8	Q3UHC0;Q3UHK8	2;1	2;1	2;1	Trinucleotide repeat-containing gene 6C protein;Trinucleotide repeat-containing gene 6A protein	Tnrc6c;Tnrc6a	sp|Q3UHC0|TNR6C_MOUSE Trinucleotide repeat-containing gene 6C protein OS=Mus musculus OX=10090 GN=Tnrc6c PE=1 SV=2;sp|Q3UHK8|TNR6A_MOUSE Trinucleotide repeat-containing gene 6A protein OS=Mus musculus OX=10090 GN=Tnrc6a PE=1 SV=2	2	2	2	2	0	0	1	0	0	2	0	0	0	1	0	0	1	0	0	2	0	0	0	1	0	0	1	0	0	2	0	0	0	1	2.2	2.2	2.2	175.77	1690	1690;1896	1	4
Q3UHD6;Q91VY6	Q3UHD6	25;1	25;1	25;1	Sorting nexin-27	Snx27	sp|Q3UHD6|SNX27_MOUSE Sorting nexin-27 OS=Mus musculus OX=10090 GN=Snx27 PE=1 SV=2	2	25	25	25	9	15	15	12	10	21	17	22	7	23	9	15	15	12	10	21	17	22	7	23	9	15	15	12	10	21	17	22	7	23	57.9	57.9	57.9	60.988	539	539;359	1	159
Q3UHJ0	Q3UHJ0	7	7	6	AP2-associated protein kinase 1	Aak1	sp|Q3UHJ0|AAK1_MOUSE AP2-associated protein kinase 1 OS=Mus musculus OX=10090 GN=Aak1 PE=1 SV=2	1	7	7	6	3	4	3	2	2	6	2	5	0	5	3	4	3	2	2	6	2	5	0	5	2	3	2	1	2	5	2	4	0	4	11.5	11.5	10.2	103.35	959	959	1	32
Q3UHU5	Q3UHU5	9	8	8	Microtubule cross-linking factor 1	Mtcl1	sp|Q3UHU5|MTCL1_MOUSE Microtubule cross-linking factor 1 OS=Mus musculus OX=10090 GN=Mtcl1 PE=1 SV=1	1	9	8	8	3	6	3	4	4	4	5	4	2	5	3	6	3	4	3	4	5	4	1	5	3	6	3	4	3	4	5	4	1	5	5.3	5	5	213.86	1945	1945	1	38
Q3UHX0	Q3UHX0	9	9	9	Nucleolar protein 8	Nol8	sp|Q3UHX0|NOL8_MOUSE Nucleolar protein 8 OS=Mus musculus OX=10090 GN=Nol8 PE=1 SV=2	1	9	9	9	5	4	6	3	2	8	7	6	1	8	5	4	6	3	2	8	7	6	1	8	5	4	6	3	2	8	7	6	1	8	10.6	10.6	10.6	128.63	1147	1147	1	51
Q3UHX2	Q3UHX2	3	3	3	28 kDa heat- and acid-stable phosphoprotein	Pdap1	sp|Q3UHX2|HAP28_MOUSE 28 kDa heat- and acid-stable phosphoprotein OS=Mus musculus OX=10090 GN=Pdap1 PE=1 SV=1	1	3	3	3	0	1	1	1	2	2	3	2	3	2	0	1	1	1	2	2	3	2	3	2	0	1	1	1	2	2	3	2	3	2	21.5	21.5	21.5	20.605	181	181	1	18
Q3UHX9	Q3UHX9	12	12	12	Putative methyltransferase C9orf114 homolog	D2Wsu81e	sp|Q3UHX9|CI114_MOUSE Putative methyltransferase C9orf114 homolog OS=Mus musculus OX=10090 GN=Spout1 PE=1 SV=1	1	12	12	12	8	9	9	7	7	11	7	12	5	10	8	9	9	7	7	11	7	12	5	10	8	9	9	7	7	11	7	12	5	10	37.1	37.1	37.1	42.957	385	385	1	88
Q3UI43	Q3UI43	9	9	9	BRISC and BRCA1-A complex member 1	Babam1	sp|Q3UI43|BABA1_MOUSE BRISC and BRCA1-A complex member 1 OS=Mus musculus OX=10090 GN=Babam1 PE=1 SV=1	1	9	9	9	8	6	7	7	6	7	9	7	5	7	8	6	7	7	6	7	9	7	5	7	8	6	7	7	6	7	9	7	5	7	39.9	39.9	39.9	36.793	333	333	1	76
Q3UIK4	Q3UIK4	2	2	2	N6-adenosine-methyltransferase subunit METTL14	Mettl14	sp|Q3UIK4|MET14_MOUSE N6-adenosine-methyltransferase non-catalytic subunit OS=Mus musculus OX=10090 GN=Mettl14 PE=1 SV=1	1	2	2	2	0	2	2	2	0	1	1	1	0	1	0	2	2	2	0	1	1	1	0	1	0	2	2	2	0	1	1	1	0	1	8.8	8.8	8.8	52.122	456	456	1	10
Q3UJB0	Q3UJB0	39	39	39		Sf3b2	tr|Q3UJB0|Q3UJB0_MOUSE Splicing factor 3b, subunit 2 OS=Mus musculus OX=10090 GN=Sf3b2 PE=1 SV=1	1	39	39	39	23	31	33	30	29	37	31	35	22	36	23	31	33	30	29	37	31	35	22	36	23	31	33	30	29	37	31	35	22	36	48.7	48.7	48.7	98.197	878	878	1	430
Q3UJB9	Q3UJB9	33	33	33	Enhancer of mRNA-decapping protein 4	Edc4	sp|Q3UJB9|EDC4_MOUSE Enhancer of mRNA-decapping protein 4 OS=Mus musculus OX=10090 GN=Edc4 PE=1 SV=2	1	33	33	33	23	24	23	17	13	22	23	24	10	26	23	24	23	17	13	22	23	24	10	26	23	24	23	17	13	22	23	24	10	26	37.1	37.1	37.1	152.48	1406	1406	1	218
Q3UJD6	Q3UJD6	3	3	3	Ubiquitin carboxyl-terminal hydrolase 19	Usp19	sp|Q3UJD6|UBP19_MOUSE Ubiquitin carboxyl-terminal hydrolase 19 OS=Mus musculus OX=10090 GN=Usp19 PE=1 SV=1	1	3	3	3	1	2	1	1	1	2	1	2	0	3	1	2	1	1	1	2	1	2	0	3	1	2	1	1	1	2	1	2	0	3	3.3	3.3	3.3	150.55	1360	1360	1	14
Q3UKJ7	Q3UKJ7	19	19	19	WD40 repeat-containing protein SMU1;WD40 repeat-containing protein SMU1, N-terminally processed	Smu1	sp|Q3UKJ7|SMU1_MOUSE WD40 repeat-containing protein SMU1 OS=Mus musculus OX=10090 GN=Smu1 PE=2 SV=2	1	19	19	19	11	15	14	17	16	17	15	17	16	17	11	15	14	17	16	17	15	17	16	17	11	15	14	17	16	17	15	17	16	17	49.5	49.5	49.5	57.543	513	513	1	226
Q3UL36	Q3UL36	7	7	7	Arginine and glutamate-rich protein 1	Arglu1	sp|Q3UL36|ARGL1_MOUSE Arginine and glutamate-rich protein 1 OS=Mus musculus OX=10090 GN=Arglu1 PE=1 SV=2	1	7	7	7	3	5	6	5	6	7	6	6	6	4	3	5	6	5	6	7	6	6	6	4	3	5	6	5	6	7	6	6	6	4	19.6	19.6	19.6	32.887	271	271	1	55
Q3ULL6	Q3ULL6	11	11	11		Upf3b	tr|Q3ULL6|Q3ULL6_MOUSE UPF3 regulator of nonsense transcripts homolog B (yeast) OS=Mus musculus OX=10090 GN=Upf3b PE=1 SV=1	1	11	11	11	2	5	7	2	2	8	7	9	2	9	2	5	7	2	2	8	7	9	2	9	2	5	7	2	2	8	7	9	2	9	29	29	29	57.065	472	472	1	53
Q3UM18	Q3UM18	16	16	16	Large subunit GTPase 1 homolog	Lsg1	sp|Q3UM18|LSG1_MOUSE Large subunit GTPase 1 homolog OS=Mus musculus OX=10090 GN=Lsg1 PE=1 SV=2	1	16	16	16	7	8	7	8	7	9	9	13	2	13	7	8	7	8	7	9	9	13	2	13	7	8	7	8	7	9	9	13	2	13	32.3	32.3	32.3	73.156	644	644	1	84
Q3UMB9	Q3UMB9	6	6	6	WASH complex subunit 7	Kiaa1033	sp|Q3UMB9|WASC4_MOUSE WASH complex subunit 4 OS=Mus musculus OX=10090 GN=Washc4 PE=1 SV=2	1	6	6	6	1	4	2	1	1	4	3	2	1	5	1	4	2	1	1	4	3	2	1	5	1	4	2	1	1	4	3	2	1	5	6.9	6.9	6.9	136.37	1173	1173	1	24
Q3UMC0;Q9D3R6	Q3UMC0	5;1	5;1	5;1	Spermatogenesis-associated protein 5	Spata5	sp|Q3UMC0|AFG2H_MOUSE ATPase family protein 2 homolog OS=Mus musculus OX=10090 GN=Spata5 PE=1 SV=2	2	5	5	5	2	5	1	2	1	4	2	2	1	3	2	5	1	2	1	4	2	2	1	3	2	5	1	2	1	4	2	2	1	3	9	9	9	97.255	893	893;539	1	23
Q3UMQ8	Q3UMQ8	1	1	1	H/ACA ribonucleoprotein complex non-core subunit NAF1	Naf1	sp|Q3UMQ8|NAF1_MOUSE H/ACA ribonucleoprotein complex non-core subunit NAF1 OS=Mus musculus OX=10090 GN=Naf1 PE=1 SV=2	1	1	1	1	0	0	0	0	0	0	0	0	0	1	0	0	0	0	0	0	0	0	0	1	0	0	0	0	0	0	0	0	0	1	3.3	3.3	3.3	53.245	489	489	1	1
Q3UMT1	Q3UMT1	3	3	3	Protein phosphatase 1 regulatory subunit 12C	Ppp1r12c	sp|Q3UMT1|PP12C_MOUSE Protein phosphatase 1 regulatory subunit 12C OS=Mus musculus OX=10090 GN=Ppp1r12c PE=1 SV=1	1	3	3	3	0	0	0	0	0	1	1	3	0	1	0	0	0	0	0	1	1	3	0	1	0	0	0	0	0	1	1	3	0	1	5.5	5.5	5.5	84.684	782	782	1	6
Q3UMU9	Q3UMU9	8	7	6	Hepatoma-derived growth factor-related protein 2	Hdgfrp2	sp|Q3UMU9|HDGR2_MOUSE Hepatoma-derived growth factor-related protein 2 OS=Mus musculus OX=10090 GN=Hdgfl2 PE=1 SV=1	1	8	7	6	6	5	5	3	4	7	6	4	3	6	5	4	4	2	3	6	5	3	2	5	4	3	3	2	3	5	4	3	2	4	14.8	13.6	13.6	74.29	669	669	1	43
Q3UMY5	Q3UMY5	8	8	8	Echinoderm microtubule-associated protein-like 4	Eml4	sp|Q3UMY5|EMAL4_MOUSE Echinoderm microtubule-associated protein-like 4 OS=Mus musculus OX=10090 GN=Eml4 PE=1 SV=1	1	8	8	8	2	5	4	1	1	4	6	4	2	6	2	5	4	1	1	4	6	4	2	6	2	5	4	1	1	4	6	4	2	6	10.7	10.7	10.7	110.03	988	988	1	35
Q3UPF5	Q3UPF5	6	6	6	Zinc finger CCCH-type antiviral protein 1	Zc3hav1	sp|Q3UPF5|ZCCHV_MOUSE Zinc finger CCCH-type antiviral protein 1 OS=Mus musculus OX=10090 GN=Zc3hav1 PE=1 SV=1	1	6	6	6	4	4	4	3	2	6	4	4	1	4	4	4	4	3	2	6	4	4	1	4	4	4	4	3	2	6	4	4	1	4	7.5	7.5	7.5	106.69	946	946	1	36
Q3UPH1	Q3UPH1	4	4	4	Protein PRRC1	Prrc1	sp|Q3UPH1|PRRC1_MOUSE Protein PRRC1 OS=Mus musculus OX=10090 GN=Prrc1 PE=1 SV=1	1	4	4	4	1	4	4	0	2	3	4	4	0	4	1	4	4	0	2	3	4	4	0	4	1	4	4	0	2	3	4	4	0	4	16.9	16.9	16.9	46.297	443	443	1	26
Q3UPL0	Q3UPL0	37	37	37	Protein transport protein Sec31A	Sec31a	sp|Q3UPL0|SC31A_MOUSE Protein transport protein Sec31A OS=Mus musculus OX=10090 GN=Sec31a PE=1 SV=2	1	37	37	37	15	27	21	19	17	31	28	34	11	31	15	27	21	19	17	31	28	34	11	31	15	27	21	19	17	31	28	34	11	31	37.6	37.6	37.6	133.57	1230	1230	1	297
Q3UQ44	Q3UQ44	1	1	1	Ras GTPase-activating-like protein IQGAP2	Iqgap2	sp|Q3UQ44|IQGA2_MOUSE Ras GTPase-activating-like protein IQGAP2 OS=Mus musculus OX=10090 GN=Iqgap2 PE=1 SV=2	1	1	1	1	1	1	1	0	1	1	0	1	0	1	1	1	1	0	1	1	0	1	0	1	1	1	1	0	1	1	0	1	0	1	0.8	0.8	0.8	180.53	1575	1575	1	7
Q3UQN2	Q3UQN2	5	5	5	F-BAR domain only protein 2	Fcho2	sp|Q3UQN2|FCHO2_MOUSE F-BAR domain only protein 2 OS=Mus musculus OX=10090 GN=Fcho2 PE=1 SV=1	1	5	5	5	1	2	2	0	0	4	4	3	0	4	1	2	2	0	0	4	4	3	0	4	1	2	2	0	0	4	4	3	0	4	11.7	11.7	11.7	88.733	809	809	1	20
Q3URQ0	Q3URQ0	2	2	2	Testis-expressed sequence 10 protein	Tex10	sp|Q3URQ0|TEX10_MOUSE Testis-expressed protein 10 OS=Mus musculus OX=10090 GN=Tex10 PE=1 SV=1	1	2	2	2	1	1	0	1	2	2	1	1	1	2	1	1	0	1	2	2	1	1	1	2	1	1	0	1	2	2	1	1	1	2	2.5	2.5	2.5	105.21	928	928	1	12
Q3URQ7	Q3URQ7	4	4	4	Methenyltetrahydrofolate synthase domain-containing protein	Mthfsd	sp|Q3URQ7|MTHSD_MOUSE Methenyltetrahydrofolate synthase domain-containing protein OS=Mus musculus OX=10090 GN=Mthfsd PE=2 SV=1	1	4	4	4	2	2	1	1	1	2	2	3	0	3	2	2	1	1	1	2	2	3	0	3	2	2	1	1	1	2	2	3	0	3	15.3	15.3	15.3	40.789	372	372	1	17
Q3USH5	Q3USH5	22	21	21	Splicing factor, suppressor of white-apricot homolog	Sfswap	sp|Q3USH5|SFSWA_MOUSE Splicing factor, suppressor of white-apricot homolog OS=Mus musculus OX=10090 GN=Sfswap PE=1 SV=2	1	22	21	21	14	12	15	15	13	15	16	17	8	19	13	11	14	15	13	14	16	17	8	18	13	11	14	15	13	14	16	17	8	18	27.6	27	27	104.19	945	945	1	165
Q3UTQ7	Q3UTQ7	1	1	1	PR domain zinc finger protein 10	Prdm10	sp|Q3UTQ7|PRD10_MOUSE PR domain zinc finger protein 10 OS=Mus musculus OX=10090 GN=Prdm10 PE=1 SV=2	1	1	1	1	1	1	1	1	1	1	1	1	0	1	1	1	1	1	1	1	1	1	0	1	1	1	1	1	1	1	1	1	0	1	1.4	1.4	1.4	133.74	1184	1184	1	9
Q3UV17;CON__Q7RTS7;CON__Q32MB2;CON__Q3SY84	Q3UV17	11;4;4;3	2;0;0;0	2;0;0;0	Keratin, type II cytoskeletal 2 oral	Krt76	sp|Q3UV17|K22O_MOUSE Keratin, type II cytoskeletal 2 oral OS=Mus musculus OX=10090 GN=Krt76 PE=1 SV=1	4	11	2	2	8	5	7	8	8	6	7	5	5	10	2	1	1	2	1	1	1	1	1	1	2	1	1	2	1	1	1	1	1	1	11.1	1.9	1.9	62.844	594	594;529;540;523	1	15
Q3UVG3	Q3UVG3	1	1	1	Protein FAM91A1	Fam91a1	sp|Q3UVG3|F91A1_MOUSE Protein FAM91A1 OS=Mus musculus OX=10090 GN=Fam91a1 PE=1 SV=1	1	1	1	1	1	1	1	0	0	1	1	1	0	1	1	1	1	0	0	1	1	1	0	1	1	1	1	0	0	1	1	1	0	1	1.4	1.4	1.4	93.462	837	837	1	7
Q3UVK0	Q3UVK0	7	7	7	Endoplasmic reticulum metallopeptidase 1	Ermp1	sp|Q3UVK0|ERMP1_MOUSE Endoplasmic reticulum metallopeptidase 1 OS=Mus musculus OX=10090 GN=Ermp1 PE=1 SV=2	1	7	7	7	5	7	4	4	3	2	1	1	0	1	5	7	4	4	3	2	1	1	0	1	5	7	4	4	3	2	1	1	0	1	11.6	11.6	11.6	100.15	898	898	1	28
Q3UVL3	Q3UVL3	1	1	1		Zfp872	tr|Q3UVL3|Q3UVL3_MOUSE Zinc finger protein 872 OS=Mus musculus OX=10090 GN=Zfp872 PE=2 SV=1	1	1	1	1	1	0	1	1	1	1	1	0	1	0	1	0	1	1	1	1	1	0	1	0	1	0	1	1	1	1	1	0	1	0	2.8	2.8	2.8	54.056	465	465	1	7
Q3UVL4	Q3UVL4	2	2	2	Vacuolar protein sorting-associated protein 51 homolog	Vps51	sp|Q3UVL4|VPS51_MOUSE Vacuolar protein sorting-associated protein 51 homolog OS=Mus musculus OX=10090 GN=Vps51 PE=1 SV=2	1	2	2	2	0	2	0	1	1	1	1	1	1	1	0	2	0	1	1	1	1	1	1	1	0	2	0	1	1	1	1	1	1	1	2.7	2.7	2.7	86.186	782	782	1	9
Q3UW53	Q3UW53	9	9	9	Protein Niban	Fam129a	sp|Q3UW53|NIBA1_MOUSE Protein Niban 1 OS=Mus musculus OX=10090 GN=Niban1 PE=1 SV=2	1	9	9	9	3	5	6	3	5	4	3	6	0	6	3	5	6	3	5	4	3	6	0	6	3	5	6	3	5	4	3	6	0	6	14	14	14	102.65	926	926	1	47
Q3UWL8	Q3UWL8	2	2	2	Prefoldin subunit 4	Pfdn4	tr|Q3UWL8|Q3UWL8_MOUSE Prefoldin subunit 4 OS=Mus musculus OX=10090 GN=Pfdn4 PE=1 SV=1	1	2	2	2	0	0	0	0	0	1	2	1	1	1	0	0	0	0	0	1	2	1	1	1	0	0	0	0	0	1	2	1	1	1	20.1	20.1	20.1	15.238	134	134	1	6
Q3UY34	Q3UY34	9	9	9	Uncharacterized protein C12orf43 homolog		sp|Q3UY34|CSTOS_MOUSE Protein CUSTOS OS=Mus musculus OX=10090 GN=Custos PE=2 SV=1	1	9	9	9	6	7	8	8	8	8	9	9	6	9	6	7	8	8	8	8	9	9	6	9	6	7	8	8	8	8	9	9	6	9	54.3	54.3	54.3	27.631	256	256	1	83
Q3UYV9	Q3UYV9	30	30	30	Nuclear cap-binding protein subunit 1	Ncbp1	sp|Q3UYV9|NCBP1_MOUSE Nuclear cap-binding protein subunit 1 OS=Mus musculus OX=10090 GN=Ncbp1 PE=1 SV=2	1	30	30	30	12	20	18	14	14	27	23	28	13	26	12	20	18	14	14	27	23	28	13	26	12	20	18	14	14	27	23	28	13	26	58.5	58.5	58.5	91.926	790	790	1	243
Q3UZ18	Q3UZ18	3	3	3	Little elongation complex subunit 2	Ice2	sp|Q3UZ18|ICE2_MOUSE Little elongation complex subunit 2 OS=Mus musculus OX=10090 GN=Ice2 PE=1 SV=2	1	3	3	3	0	2	1	0	0	2	2	3	0	2	0	2	1	0	0	2	2	3	0	2	0	2	1	0	0	2	2	3	0	2	2.7	2.7	2.7	109.88	988	988	1	12
Q3V009	Q3V009	1	1	1	Transmembrane emp24 domain-containing protein 1	Tmed1	sp|Q3V009|TMED1_MOUSE Transmembrane emp24 domain-containing protein 1 OS=Mus musculus OX=10090 GN=Tmed1 PE=1 SV=1	1	1	1	1	1	1	1	0	0	0	0	0	0	0	1	1	1	0	0	0	0	0	0	0	1	1	1	0	0	0	0	0	0	0	4	4	4	25.262	227	227	1	3
Q3V0C5	Q3V0C5	9	9	9	Ubiquitin carboxyl-terminal hydrolase 48	Usp48	sp|Q3V0C5|UBP48_MOUSE Ubiquitin carboxyl-terminal hydrolase 48 OS=Mus musculus OX=10090 GN=Usp48 PE=1 SV=2	1	9	9	9	1	8	8	3	3	5	5	8	0	8	1	8	8	3	3	5	5	8	0	8	1	8	8	3	3	5	5	8	0	8	12.5	12.5	12.5	120.63	1052	1052	1	49
Q3V1T4	Q3V1T4	8	8	8	Prolyl 3-hydroxylase 1	Lepre1	sp|Q3V1T4|P3H1_MOUSE Prolyl 3-hydroxylase 1 OS=Mus musculus OX=10090 GN=P3h1 PE=1 SV=2	1	8	8	8	2	6	7	3	6	7	5	5	1	4	2	6	7	3	6	7	5	5	1	4	2	6	7	3	6	7	5	5	1	4	14.7	14.7	14.7	83.65	739	739	1	46
Q3V3R1	Q3V3R1	46	46	46	Monofunctional C1-tetrahydrofolate synthase, mitochondrial	Mthfd1l	sp|Q3V3R1|C1TM_MOUSE Monofunctional C1-tetrahydrofolate synthase, mitochondrial OS=Mus musculus OX=10090 GN=Mthfd1l PE=1 SV=2	1	46	46	46	30	43	41	34	35	31	24	39	6	39	30	43	41	34	35	31	24	39	6	39	30	43	41	34	35	31	24	39	6	39	54.6	54.6	54.6	105.73	977	977	1	393
Q3V3W4	Q3V3W4	1	1	1		Zbtb2	tr|Q3V3W4|Q3V3W4_MOUSE Zinc finger and BTB domain-containing 2 OS=Mus musculus OX=10090 GN=Zbtb2 PE=1 SV=1	1	1	1	1	0	0	1	0	0	1	1	1	0	0	0	0	1	0	0	1	1	1	0	0	0	0	1	0	0	1	1	1	0	0	2.7	2.7	2.7	57.281	514	514	1	4
Q3V4B5	Q3V4B5	4	4	4	COMM domain-containing protein 6	Commd6	sp|Q3V4B5|COMD6_MOUSE COMM domain-containing protein 6 OS=Mus musculus OX=10090 GN=Commd6 PE=1 SV=1	1	4	4	4	2	0	3	2	1	2	1	1	0	4	2	0	3	2	1	2	1	1	0	4	2	0	3	2	1	2	1	1	0	4	59.8	59.8	59.8	9.7951	87	87	1	16
Q497V5	Q497V5	19	19	19	S1 RNA-binding domain-containing protein 1	Srbd1	sp|Q497V5|SRBD1_MOUSE S1 RNA-binding domain-containing protein 1 OS=Mus musculus OX=10090 GN=Srbd1 PE=2 SV=3	1	19	19	19	5	7	5	4	2	12	8	12	4	17	5	7	5	4	2	12	8	12	4	17	5	7	5	4	2	12	8	12	4	17	27.5	27.5	27.5	110.28	982	982	1	78
Q4FK66	Q4FK66	7	7	7	Pre-mRNA-splicing factor 38A	Prpf38a	sp|Q4FK66|PR38A_MOUSE Pre-mRNA-splicing factor 38A OS=Mus musculus OX=10090 GN=Prpf38a PE=1 SV=1	1	7	7	7	4	6	6	5	5	6	5	5	4	5	4	6	6	5	5	6	5	5	4	5	4	6	6	5	5	6	5	5	4	5	22.4	22.4	22.4	37.436	312	312	1	51
Q4FZF3	Q4FZF3	3	3	3	Probable ATP-dependent RNA helicase DDX49	Ddx49	sp|Q4FZF3|DDX49_MOUSE Probable ATP-dependent RNA helicase DDX49 OS=Mus musculus OX=10090 GN=Ddx49 PE=2 SV=1	1	3	3	3	0	3	2	1	2	3	1	3	1	3	0	3	2	1	2	3	1	3	1	3	0	3	2	1	2	3	1	3	1	3	10.8	10.8	10.8	54.093	480	480	1	19
Q4JIM5	Q4JIM5	3	3	1	Abelson tyrosine-protein kinase 2	Abl2	sp|Q4JIM5|ABL2_MOUSE Tyrosine-protein kinase ABL2 OS=Mus musculus OX=10090 GN=Abl2 PE=1 SV=1	1	3	3	1	1	2	2	2	2	3	2	2	1	3	1	2	2	2	2	3	2	2	1	3	0	1	1	1	1	1	1	1	1	1	2.7	2.7	0.8	128.19	1182	1182	1	21
Q4KML4	Q4KML4	1	1	1	Costars family protein ABRACL	Abracl	sp|Q4KML4|ABRAL_MOUSE Costars family protein ABRACL OS=Mus musculus OX=10090 GN=Abracl PE=1 SV=1	1	1	1	1	0	0	0	0	0	0	1	1	0	1	0	0	0	0	0	0	1	1	0	1	0	0	0	0	0	0	1	1	0	1	19.8	19.8	19.8	9.0303	81	81	1	3
Q4PJX1	Q4PJX1	3	3	3	Protein odr-4 homolog	Odr4	sp|Q4PJX1|ODR4_MOUSE Protein odr-4 homolog OS=Mus musculus OX=10090 GN=Odr4 PE=1 SV=2	1	3	3	3	2	1	1	3	1	0	1	1	1	1	2	1	1	3	1	0	1	1	1	1	2	1	1	3	1	0	1	1	1	1	9.4	9.4	9.4	49.997	447	447	1	12
Q4VA53	Q4VA53	37	35	35	Sister chromatid cohesion protein PDS5 homolog B	Pds5b	sp|Q4VA53|PDS5B_MOUSE Sister chromatid cohesion protein PDS5 homolog B OS=Mus musculus OX=10090 GN=Pds5b PE=1 SV=1	1	37	35	35	17	25	26	25	22	27	29	29	12	34	16	24	25	24	21	25	28	28	12	32	16	24	25	24	21	25	28	28	12	32	34	32.6	32.6	164.42	1446	1446	1	255
Q4VAA2	Q4VAA2	2	2	2	Protein CDV3	Cdv3	sp|Q4VAA2|CDV3_MOUSE Protein CDV3 OS=Mus musculus OX=10090 GN=Cdv3 PE=1 SV=2	1	2	2	2	2	1	2	1	0	1	2	1	1	0	2	1	2	1	0	1	2	1	1	0	2	1	2	1	0	1	2	1	1	0	13.5	13.5	13.5	29.729	281	281	1	11
Q4VBE8	Q4VBE8	10	10	10	WD repeat-containing protein 18	Wdr18	sp|Q4VBE8|WDR18_MOUSE WD repeat-containing protein 18 OS=Mus musculus OX=10090 GN=Wdr18 PE=1 SV=1	1	10	10	10	7	9	9	5	5	7	5	7	1	9	7	9	9	5	5	7	5	7	1	9	7	9	9	5	5	7	5	7	1	9	29.7	29.7	29.7	47.211	431	431	1	65
Q4VGL6	Q4VGL6	1	1	1	Roquin-1	Rc3h1	sp|Q4VGL6|RC3H1_MOUSE Roquin-1 OS=Mus musculus OX=10090 GN=Rc3h1 PE=1 SV=1	1	1	1	1	0	1	0	0	0	1	0	1	1	1	0	1	0	0	0	1	0	1	1	1	0	1	0	0	0	1	0	1	1	1	1.8	1.8	1.8	125.38	1130	1130	1	5
Q4ZGD9	Q4ZGD9	3	3	3		Nxf3	tr|Q4ZGD9|Q4ZGD9_MOUSE Nuclear RNA export factor 3 OS=Mus musculus OX=10090 GN=Nxf3 PE=1 SV=1	1	3	3	3	1	2	1	1	1	3	2	2	0	1	1	2	1	1	1	3	2	2	0	1	1	2	1	1	1	3	2	2	0	1	6.9	6.9	6.9	63.652	553	553	1	14
Q501J6	Q501J6	36	27	27	Probable ATP-dependent RNA helicase DDX17	Ddx17	sp|Q501J6|DDX17_MOUSE Probable ATP-dependent RNA helicase DDX17 OS=Mus musculus OX=10090 GN=Ddx17 PE=1 SV=1	1	36	27	27	28	34	34	25	26	35	33	33	26	33	21	26	25	17	18	26	24	24	18	24	21	26	25	17	18	26	24	24	18	24	51.4	42	42	72.399	650	650	1	271
Q505F5	Q505F5	3	3	3	Leucine-rich repeat-containing protein 47	Lrrc47	sp|Q505F5|LRC47_MOUSE Leucine-rich repeat-containing protein 47 OS=Mus musculus OX=10090 GN=Lrrc47 PE=1 SV=1	1	3	3	3	1	2	2	0	2	2	2	3	0	2	1	2	2	0	2	2	2	3	0	2	1	2	2	0	2	2	2	3	0	2	6.2	6.2	6.2	63.589	581	581	1	16
Q52KE7	Q52KE7	1	1	1	Cyclin-L1	Ccnl1	sp|Q52KE7|CCNL1_MOUSE Cyclin-L1 OS=Mus musculus OX=10090 GN=Ccnl1 PE=1 SV=1	1	1	1	1	0	0	0	0	0	1	0	0	0	1	0	0	0	0	0	1	0	0	0	1	0	0	0	0	0	1	0	0	0	1	2.8	2.8	2.8	60.132	532	532	1	2
Q52KI8	Q52KI8	13	13	13	Serine/arginine repetitive matrix protein 1	Srrm1	sp|Q52KI8|SRRM1_MOUSE Serine/arginine repetitive matrix protein 1 OS=Mus musculus OX=10090 GN=Srrm1 PE=1 SV=2	1	13	13	13	8	7	7	6	7	10	8	9	6	13	8	7	7	6	7	10	8	9	6	13	8	7	7	6	7	10	8	9	6	13	14.7	14.7	14.7	106.86	946	946	1	91
Q569Z5	Q569Z5	36	36	36	Probable ATP-dependent RNA helicase DDX46	Ddx46	sp|Q569Z5|DDX46_MOUSE Probable ATP-dependent RNA helicase DDX46 OS=Mus musculus OX=10090 GN=Ddx46 PE=1 SV=2	1	36	36	36	17	27	26	19	14	30	27	32	13	32	17	27	26	19	14	30	27	32	13	32	17	27	26	19	14	30	27	32	13	32	43.2	43.2	43.2	117.45	1032	1032	1	245
Q569Z6	Q569Z6	28	28	27	Thyroid hormone receptor-associated protein 3	Thrap3	sp|Q569Z6|TR150_MOUSE Thyroid hormone receptor-associated protein 3 OS=Mus musculus OX=10090 GN=Thrap3 PE=1 SV=1	1	28	28	27	13	16	17	16	14	22	16	21	14	22	13	16	17	16	14	22	16	21	14	22	13	16	17	16	14	22	16	21	14	21	27.9	27.9	27.9	108.18	951	951	1	204
Q56A08	Q56A08	6	6	6	G patch domain and KOW motifs-containing protein	Gpkow	sp|Q56A08|GPKOW_MOUSE G-patch domain and KOW motifs-containing protein OS=Mus musculus OX=10090 GN=Gpkow PE=1 SV=2	1	6	6	6	1	3	2	1	0	2	2	4	1	6	1	3	2	1	0	2	2	4	1	6	1	3	2	1	0	2	2	4	1	6	15.6	15.6	15.6	53.831	488	488	1	22
Q571G4	Q571G4	6	6	6	Protein lin-54 homolog	Lin54	sp|Q571G4|LIN54_MOUSE Protein lin-54 homolog OS=Mus musculus OX=10090 GN=Lin54 PE=2 SV=2	1	6	6	6	0	4	1	1	1	5	2	6	1	6	0	4	1	1	1	5	2	6	1	6	0	4	1	1	1	5	2	6	1	6	13.2	13.2	13.2	79.565	749	749	1	27
Q571H0	Q571H0	5	5	5	Nucleolar pre-ribosomal-associated protein 1	Urb1	sp|Q571H0|NPA1P_MOUSE Nucleolar pre-ribosomal-associated protein 1 OS=Mus musculus OX=10090 GN=Urb1 PE=1 SV=2	1	5	5	5	3	3	3	1	0	3	3	4	2	5	3	3	3	1	0	3	3	4	2	5	3	3	3	1	0	3	3	4	2	5	3.3	3.3	3.3	254.61	2274	2274	1	27
Q5DTM8	Q5DTM8	33	33	29	E3 ubiquitin-protein ligase BRE1A	Rnf20	sp|Q5DTM8|BRE1A_MOUSE E3 ubiquitin-protein ligase BRE1A OS=Mus musculus OX=10090 GN=Rnf20 PE=1 SV=2	1	33	33	29	10	20	21	14	13	23	21	26	5	26	10	20	21	14	13	23	21	26	5	26	8	18	19	12	12	22	19	23	4	23	40.5	40.5	37.3	113.52	973	973	1	193
Q5DTT3	Q5DTT3	2	2	2	Protein FAM208B	Fam208b	sp|Q5DTT3|TASO2_MOUSE Protein TASOR 2 OS=Mus musculus OX=10090 GN=Tasor2 PE=1 SV=2	1	2	2	2	1	1	1	0	0	2	1	1	0	1	1	1	1	0	0	2	1	1	0	1	1	1	1	0	0	2	1	1	0	1	1.1	1.1	1.1	264.28	2382	2382	1	8
Q5DTT8;Q9ERH6;Q8C1C8	Q5DTT8	21;1;1	21;1;1	21;1;1	Paraneoplastic antigen-like protein 5	Pnma5	sp|Q5DTT8|PNMA5_MOUSE Paraneoplastic antigen-like protein 5 OS=Mus musculus OX=10090 GN=Pnma5 PE=1 SV=2	3	21	21	21	13	15	15	14	12	17	13	17	5	14	13	15	15	14	12	17	13	17	5	14	13	15	15	14	12	17	13	17	5	14	51	51	51	69.136	618	618;352;353	1	151
Q5DW34	Q5DW34	9	9	9	Histone-lysine N-methyltransferase EHMT1	Ehmt1	sp|Q5DW34|EHMT1_MOUSE Histone-lysine N-methyltransferase EHMT1 OS=Mus musculus OX=10090 GN=Ehmt1 PE=1 SV=2	1	9	9	9	3	7	6	4	5	8	8	6	3	7	3	7	6	4	5	8	8	6	3	7	3	7	6	4	5	8	8	6	3	7	11.1	11.1	11.1	142	1296	1296	1	57
Q5EG47;Q8BRK8	Q5EG47	13;2	13;2	13;2	5-AMP-activated protein kinase catalytic subunit alpha-1	Prkaa1	sp|Q5EG47|AAPK1_MOUSE 5-AMP-activated protein kinase catalytic subunit alpha-1 OS=Mus musculus OX=10090 GN=Prkaa1 PE=1 SV=2	2	13	13	13	11	9	10	10	11	11	13	12	8	9	11	9	10	10	11	11	13	12	8	9	11	9	10	10	11	11	13	12	8	9	29.9	29.9	29.9	63.928	559	559;552	1	116
Q5F2E7	Q5F2E7	14	14	14	Nuclear fragile X mental retardation-interacting protein 2	Nufip2	sp|Q5F2E7|NUFP2_MOUSE Nuclear fragile X mental retardation-interacting protein 2 OS=Mus musculus OX=10090 GN=Nufip2 PE=1 SV=1	1	14	14	14	6	7	7	5	3	9	8	10	1	11	6	7	7	5	3	9	8	10	1	11	6	7	7	5	3	9	8	10	1	11	32.8	32.8	32.8	75.656	692	692	1	74
Q5HZG4	Q5HZG4	2	2	2	Transcription initiation factor TFIID subunit 3	Taf3	sp|Q5HZG4|TAF3_MOUSE Transcription initiation factor TFIID subunit 3 OS=Mus musculus OX=10090 GN=Taf3 PE=1 SV=2	1	2	2	2	0	0	0	0	0	1	1	0	0	2	0	0	0	0	0	1	1	0	0	2	0	0	0	0	0	1	1	0	0	2	4.4	4.4	4.4	105.11	932	932	1	5
Q5HZJ0	Q5HZJ0	4	4	4	Ribonuclease 3	Drosha	sp|Q5HZJ0|RNC_MOUSE Ribonuclease 3 OS=Mus musculus OX=10090 GN=Drosha PE=1 SV=1	1	4	4	4	0	0	0	1	0	3	2	3	0	4	0	0	0	1	0	3	2	3	0	4	0	0	0	1	0	3	2	3	0	4	3.6	3.6	3.6	158.83	1373	1373	1	13
Q5I0W6;Q8C6B0;G3X9G9	Q5I0W6;Q8C6B0;G3X9G9	2;2;1	2;2;1	2;2;1		Mettl7a2;Mettl7a1;Mettl7a3	tr|Q5I0W6|Q5I0W6_MOUSE Methyltransferase-like 7A2 OS=Mus musculus OX=10090 GN=Mettl7a2 PE=2 SV=1;tr|Q8C6B0|Q8C6B0_MOUSE Methyltransferase-like 7A1 OS=Mus musculus OX=10090 GN=Mettl7a1 PE=1 SV=1;tr|G3X9G9|G3X9G9_MOUSE Methyltransferase-like 7A3 OS=Mus muscu	3	2	2	2	2	1	1	0	2	0	0	0	0	0	2	1	1	0	2	0	0	0	0	0	2	1	1	0	2	0	0	0	0	0	12.7	12.7	12.7	28.046	244	244;244;244	1	6
Q5NC05	Q5NC05	2	2	2	Transcription termination factor 2	Ttf2	sp|Q5NC05|TTF2_MOUSE Transcription termination factor 2 OS=Mus musculus OX=10090 GN=Ttf2 PE=1 SV=2	1	2	2	2	0	1	0	1	1	2	0	1	0	1	0	1	0	1	1	2	0	1	0	1	0	1	0	1	1	2	0	1	0	1	1.7	1.7	1.7	125.53	1138	1138	1	7
Q5NC83	Q5NC83	1	1	1	Uncharacterized protein C7orf72 homolog		sp|Q5NC83|SPT48_MOUSE Spermatogenesis-associated protein 48 OS=Mus musculus OX=10090 GN=Spata48 PE=2 SV=2	1	1	1	1	1	1	1	0	1	0	0	0	0	0	1	1	1	0	1	0	0	0	0	0	1	1	1	0	1	0	0	0	0	0	2.3	2.3	2.3	50.4	441	441	1	4
Q5NCR9	Q5NCR9	10	10	10	Nuclear speckle splicing regulatory protein 1	Nsrp1	sp|Q5NCR9|NSRP1_MOUSE Nuclear speckle splicing regulatory protein 1 OS=Mus musculus OX=10090 GN=Nsrp1 PE=1 SV=1	1	10	10	10	6	6	5	5	5	8	5	9	4	6	6	6	5	5	5	8	5	9	4	6	6	6	5	5	5	8	5	9	4	6	20.8	20.8	20.8	63.798	542	542	1	59
Q5PRE5	Q5PRE5	2	2	2	Proline and serine-rich protein 1	Proser1	sp|Q5PRE5|PRSR1_MOUSE Proline and serine-rich protein 1 OS=Mus musculus OX=10090 GN=Proser1 PE=1 SV=1	1	2	2	2	0	0	1	1	1	2	2	2	0	2	0	0	1	1	1	2	2	2	0	2	0	0	1	1	1	2	2	2	0	2	3.9	3.9	3.9	91.977	913	913	1	11
Q5PSV9	Q5PSV9	46	46	46	Mediator of DNA damage checkpoint protein 1	Mdc1	sp|Q5PSV9|MDC1_MOUSE Mediator of DNA damage checkpoint protein 1 OS=Mus musculus OX=10090 GN=Mdc1 PE=1 SV=1	1	46	46	46	28	34	29	31	29	37	37	39	20	37	28	34	29	31	29	37	37	39	20	37	28	34	29	31	29	37	37	39	20	37	43.1	43.1	43.1	184.67	1707	1707	1	343
Q5RJG1	Q5RJG1	2	2	2	Nucleolar protein 10	Nol10	sp|Q5RJG1|NOL10_MOUSE Nucleolar protein 10 OS=Mus musculus OX=10090 GN=Nol10 PE=2 SV=1	1	2	2	2	1	2	2	2	2	2	0	0	0	0	1	2	2	2	2	2	0	0	0	0	1	2	2	2	2	2	0	0	0	0	2.9	2.9	2.9	80.076	687	687	1	12
Q5RL79	Q5RL79	1	1	1	Keratinocyte-associated protein 2	Krtcap2	sp|Q5RL79|KTAP2_MOUSE Keratinocyte-associated protein 2 OS=Mus musculus OX=10090 GN=Krtcap2 PE=1 SV=2	1	1	1	1	0	1	0	0	0	0	1	0	0	0	0	1	0	0	0	0	1	0	0	0	0	1	0	0	0	0	1	0	0	0	12.5	12.5	12.5	14.674	136	136	1	2
Q5SFM8	Q5SFM8	4	3	3	RNA-binding protein 27	Rbm27	sp|Q5SFM8|RBM27_MOUSE RNA-binding protein 27 OS=Mus musculus OX=10090 GN=Rbm27 PE=1 SV=3	1	4	3	3	0	3	2	1	1	2	2	2	1	3	0	2	2	1	0	1	1	1	0	2	0	2	2	1	0	1	1	1	0	2	4.5	3.4	3.4	118.55	1060	1060	1	10
Q5SQF8	Q5SQF8	2	2	2	Histone deacetylase complex subunit SAP30L	Sap30l	sp|Q5SQF8|SP30L_MOUSE Histone deacetylase complex subunit SAP30L OS=Mus musculus OX=10090 GN=Sap30l PE=1 SV=1	1	2	2	2	0	1	0	0	0	1	0	0	0	0	0	1	0	0	0	1	0	0	0	0	0	1	0	0	0	1	0	0	0	0	10.4	10.4	10.4	20.745	182	182	1	2
Q5SRX1	Q5SRX1	6	6	5	TOM1-like protein 2	Tom1l2	sp|Q5SRX1|TM1L2_MOUSE TOM1-like protein 2 OS=Mus musculus OX=10090 GN=Tom1l2 PE=1 SV=1	1	6	6	5	2	4	1	2	1	4	3	2	0	4	2	4	1	2	1	4	3	2	0	4	2	4	1	2	1	4	3	2	0	4	19.3	19.3	15.6	55.662	507	507	1	23
Q5SSI6	Q5SSI6	8	8	8	U3 small nucleolar RNA-associated protein 18 homolog	Utp18	sp|Q5SSI6|UTP18_MOUSE U3 small nucleolar RNA-associated protein 18 homolog OS=Mus musculus OX=10090 GN=Utp18 PE=1 SV=1	1	8	8	8	5	5	5	7	6	5	5	5	2	7	5	5	5	7	6	5	5	5	2	7	5	5	5	7	6	5	5	5	2	7	17	17	17	61.217	552	552	1	52
Q5SU73	Q5SU73	4	4	4	Coilin	Coil	sp|Q5SU73|COIL_MOUSE Coilin OS=Mus musculus OX=10090 GN=Coil PE=1 SV=1	1	4	4	4	2	2	2	2	1	4	3	1	0	3	2	2	2	2	1	4	3	1	0	3	2	2	2	2	1	4	3	1	0	3	8.8	8.8	8.8	61.916	570	570	1	20
Q5SUF2;REV__Q9Z218;Q9CXP8;P63213	Q5SUF2	16;1;1;1	16;1;1;1	16;1;1;1	Luc7-like protein 3	Luc7l3	sp|Q5SUF2|LC7L3_MOUSE Luc7-like protein 3 OS=Mus musculus OX=10090 GN=Luc7l3 PE=1 SV=1	4	16	16	16	11	15	14	14	15	14	16	16	8	15	11	15	14	14	15	14	16	16	8	15	11	15	14	14	15	14	16	16	8	15	37	37	37	51.45	432	432;804;68;71	1	177
Q5SW19	Q5SW19	3	3	3	Clustered mitochondria protein homolog	Cluh	sp|Q5SW19|CLU_MOUSE Clustered mitochondria protein homolog OS=Mus musculus OX=10090 GN=Cluh PE=1 SV=2	1	3	3	3	0	0	0	0	1	1	1	3	0	2	0	0	0	0	1	1	1	3	0	2	0	0	0	0	1	1	1	3	0	2	2.2	2.2	2.2	148.07	1315	1315	1	9
Q5SWD9	Q5SWD9	14	14	14	Pre-rRNA-processing protein TSR1 homolog	Tsr1	sp|Q5SWD9|TSR1_MOUSE Pre-rRNA-processing protein TSR1 homolog OS=Mus musculus OX=10090 GN=Tsr1 PE=1 SV=1	1	14	14	14	9	11	9	7	5	8	9	11	2	13	9	11	9	7	5	8	9	11	2	13	9	11	9	7	5	8	9	11	2	13	23	23	23	92.104	803	803	1	100
Q5SWU9	Q5SWU9	1	1	1	Acetyl-CoA carboxylase 1;Biotin carboxylase	Acaca	sp|Q5SWU9|ACACA_MOUSE Acetyl-CoA carboxylase 1 OS=Mus musculus OX=10090 GN=Acaca PE=1 SV=1	1	1	1	1	0	0	0	0	1	1	1	1	0	1	0	0	0	0	1	1	1	1	0	1	0	0	0	0	1	1	1	1	0	1	0.6	0.6	0.6	265.25	2345	2345	1	5
Q5SWW4	Q5SWW4	1	1	1	Mediator of RNA polymerase II transcription subunit 13	Med13	sp|Q5SWW4|MED13_MOUSE Mediator of RNA polymerase II transcription subunit 13 OS=Mus musculus OX=10090 GN=Med13 PE=1 SV=1	1	1	1	1	0	0	0	0	0	0	0	0	0	1	0	0	0	0	0	0	0	0	0	1	0	0	0	0	0	0	0	0	0	1	1.3	1.3	1.3	238.59	2171	2171	1	1
Q5SXC4	Q5SXC4	2	1	1		Vezf1	tr|Q5SXC4|Q5SXC4_MOUSE Vascular endothelial zinc finger 1 OS=Mus musculus OX=10090 GN=Vezf1 PE=1 SV=1	1	2	1	1	2	2	2	2	2	2	2	2	0	2	1	1	1	1	1	1	1	1	0	1	1	1	1	1	1	1	1	1	0	1	3.7	2.3	2.3	56.556	518	518	1	9
Q5U4D9	Q5U4D9	18	18	18	THO complex subunit 6 homolog	Thoc6	sp|Q5U4D9|THOC6_MOUSE THO complex subunit 6 homolog OS=Mus musculus OX=10090 GN=Thoc6 PE=1 SV=1	1	18	18	18	12	15	10	11	11	14	14	17	9	17	12	15	10	11	11	14	14	17	9	17	12	15	10	11	11	14	14	17	9	17	76.2	76.2	76.2	37.314	341	341	1	161
Q5U5Q9	Q5U5Q9	16	16	16	BRCA1-A complex subunit RAP80	Uimc1	sp|Q5U5Q9|UIMC1_MOUSE BRCA1-A complex subunit RAP80 OS=Mus musculus OX=10090 GN=Uimc1 PE=1 SV=2	1	16	16	16	8	9	10	12	9	13	11	13	9	13	8	9	10	12	9	13	11	13	9	13	8	9	10	12	9	13	11	13	9	13	33.4	33.4	33.4	81.477	727	727	1	109
Q5XG69	Q5XG69	2	2	2	Soluble lamin-associated protein of 75 kDa	Fam169a	sp|Q5XG69|F169A_MOUSE Soluble lamin-associated protein of 75 kDa OS=Mus musculus OX=10090 GN=Fam169a PE=1 SV=3	1	2	2	2	0	1	0	1	1	0	0	1	0	1	0	1	0	1	1	0	0	1	0	1	0	1	0	1	1	0	0	1	0	1	3.5	3.5	3.5	73.239	665	665	1	5
Q5XJE5	Q5XJE5	9	9	9	RNA polymerase-associated protein LEO1	Leo1	sp|Q5XJE5|LEO1_MOUSE RNA polymerase-associated protein LEO1 OS=Mus musculus OX=10090 GN=Leo1 PE=1 SV=2	1	9	9	9	5	4	5	6	5	8	8	8	7	7	5	4	5	6	5	8	8	8	7	7	5	4	5	6	5	8	8	8	7	7	17.7	17.7	17.7	75.596	667	667	1	69
Q5XJY5	Q5XJY5	29	29	29	Coatomer subunit delta	Arcn1	sp|Q5XJY5|COPD_MOUSE Coatomer subunit delta OS=Mus musculus OX=10090 GN=Arcn1 PE=1 SV=2	1	29	29	29	21	18	21	20	17	24	18	25	11	25	21	18	21	20	17	24	18	25	11	25	21	18	21	20	17	24	18	25	11	25	61.1	61.1	61.1	57.229	511	511	1	216
Q5XKN4	Q5XKN4	2	2	2	Protein jagunal homolog 1	Jagn1	sp|Q5XKN4|JAGN1_MOUSE Protein jagunal homolog 1 OS=Mus musculus OX=10090 GN=Jagn1 PE=1 SV=2	1	2	2	2	1	1	1	2	2	0	0	0	0	0	1	1	1	2	2	0	0	0	0	0	1	1	1	2	2	0	0	0	0	0	13.1	13.1	13.1	21.102	183	183	1	7
Q60520	Q60520	43	43	42	Paired amphipathic helix protein Sin3a	Sin3a	sp|Q60520|SIN3A_MOUSE Paired amphipathic helix protein Sin3a OS=Mus musculus OX=10090 GN=Sin3a PE=1 SV=3	1	43	43	42	26	31	34	28	28	34	31	37	15	38	26	31	34	28	28	34	31	37	15	38	26	31	34	28	28	34	30	36	15	37	44.3	44.3	42.5	145.09	1274	1274	1	365
Q60596;REV__O35625	Q60596	21;1	21;1	21;1	DNA repair protein XRCC1	Xrcc1	sp|Q60596|XRCC1_MOUSE DNA repair protein XRCC1 OS=Mus musculus OX=10090 GN=Xrcc1 PE=1 SV=2	2	21	21	21	13	12	13	8	14	15	17	17	8	19	13	12	13	8	14	15	17	17	8	19	13	12	13	8	14	15	17	17	8	19	47.1	47.1	47.1	68.97	631	631;863	1	140
Q60597;E9Q7L0	Q60597	6;2	6;2	6;2	2-oxoglutarate dehydrogenase, mitochondrial	Ogdh	sp|Q60597|ODO1_MOUSE 2-oxoglutarate dehydrogenase, mitochondrial OS=Mus musculus OX=10090 GN=Ogdh PE=1 SV=3	2	6	6	6	5	5	4	5	3	2	2	3	1	3	5	5	4	5	3	2	2	3	1	3	5	5	4	5	3	2	2	3	1	3	6.7	6.7	6.7	116.45	1023	1023;1029	1	34
Q60598	Q60598	22	22	22	Src substrate cortactin	Cttn	sp|Q60598|SRC8_MOUSE Src substrate cortactin OS=Mus musculus OX=10090 GN=Cttn PE=1 SV=2	1	22	22	22	18	20	20	18	20	21	22	20	18	17	18	20	20	18	20	21	22	20	18	17	18	20	20	18	20	21	22	20	18	17	30.8	30.8	30.8	61.249	546	546	1	246
Q60605;Q8CI43	Q60605	7;1	7;1	7;1	Myosin light polypeptide 6	Myl6	sp|Q60605|MYL6_MOUSE Myosin light polypeptide 6 OS=Mus musculus OX=10090 GN=Myl6 PE=1 SV=3	2	7	7	7	4	4	4	4	3	5	6	6	6	5	4	4	4	4	3	5	6	6	6	5	4	4	4	4	3	5	6	6	6	5	50.3	50.3	50.3	16.93	151	151;207	1	64
Q60611;Q8VI24	Q60611	17;3	17;3	17;3	DNA-binding protein SATB1	Satb1	sp|Q60611|SATB1_MOUSE DNA-binding protein SATB1 OS=Mus musculus OX=10090 GN=Satb1 PE=1 SV=2	2	17	17	17	7	10	12	9	4	12	14	10	2	15	7	10	12	9	4	12	14	10	2	15	7	10	12	9	4	12	14	10	2	15	33.5	33.5	33.5	85.879	764	764;733	1	95
Q60631	Q60631	3	3	3	Growth factor receptor-bound protein 2	Grb2	sp|Q60631|GRB2_MOUSE Growth factor receptor-bound protein 2 OS=Mus musculus OX=10090 GN=Grb2 PE=1 SV=1	1	3	3	3	3	1	3	1	2	1	2	1	2	1	3	1	3	1	2	1	2	1	2	1	3	1	3	1	2	1	2	1	2	1	12.4	12.4	12.4	25.238	217	217	1	17
Q60649	Q60649	10	10	10	Caseinolytic peptidase B protein homolog	Clpb	sp|Q60649|CLPB_MOUSE Caseinolytic peptidase B protein homolog OS=Mus musculus OX=10090 GN=Clpb PE=1 SV=1	1	10	10	10	5	7	5	4	4	6	5	7	2	10	5	7	5	4	4	6	5	7	2	10	5	7	5	4	4	6	5	7	2	10	20.7	20.7	20.7	76.003	677	677	1	55
Q60668;Q9D3U4	Q60668	15;1	15;1	13;0	Heterogeneous nuclear ribonucleoprotein D0	Hnrnpd	sp|Q60668|HNRPD_MOUSE Heterogeneous nuclear ribonucleoprotein D0 OS=Mus musculus OX=10090 GN=Hnrnpd PE=1 SV=2	2	15	15	13	7	11	12	10	10	13	14	14	9	15	7	11	12	10	10	13	14	14	9	15	6	9	10	8	8	11	12	12	8	13	34.6	34.6	31.8	38.354	355	355;565	1	158
Q60676	Q60676	1	1	1	Serine/threonine-protein phosphatase 5	Ppp5c	sp|Q60676|PPP5_MOUSE Serine/threonine-protein phosphatase 5 OS=Mus musculus OX=10090 GN=Ppp5c PE=1 SV=3	1	1	1	1	0	0	1	0	0	0	0	0	0	1	0	0	1	0	0	0	0	0	0	1	0	0	1	0	0	0	0	0	0	1	2.6	2.6	2.6	56.876	499	499	1	2
Q60692	Q60692	1	1	1	Proteasome subunit beta type-6	Psmb6	sp|Q60692|PSB6_MOUSE Proteasome subunit beta type-6 OS=Mus musculus OX=10090 GN=Psmb6 PE=1 SV=3	1	1	1	1	1	0	0	0	1	1	1	1	0	0	1	0	0	0	1	1	1	1	0	0	1	0	0	0	1	1	1	1	0	0	4.6	4.6	4.6	25.378	238	238	1	5
Q60715	Q60715	8	8	8	Prolyl 4-hydroxylase subunit alpha-1	P4ha1	sp|Q60715|P4HA1_MOUSE Prolyl 4-hydroxylase subunit alpha-1 OS=Mus musculus OX=10090 GN=P4ha1 PE=1 SV=2	1	8	8	8	3	6	4	3	3	5	1	6	0	4	3	6	4	3	3	5	1	6	0	4	3	6	4	3	3	5	1	6	0	4	16.9	16.9	16.9	60.909	534	534	1	35
Q60722	Q60722	15	15	13	Transcription factor 4	Tcf4	sp|Q60722|ITF2_MOUSE Transcription factor 4 OS=Mus musculus OX=10090 GN=Tcf4 PE=1 SV=1	1	15	15	13	8	8	10	9	8	12	11	11	6	13	8	8	10	9	8	12	11	11	6	13	7	6	8	7	6	10	9	9	6	11	39	39	36.3	71.624	670	670	1	101
Q60737;P30275;Q6P8J7	Q60737	15;1;1	15;1;1	14;0;0	Casein kinase II subunit alpha	Csnk2a1	sp|Q60737|CSK21_MOUSE Casein kinase II subunit alpha OS=Mus musculus OX=10090 GN=Csnk2a1 PE=1 SV=2	3	15	15	14	13	12	12	13	13	15	13	12	6	12	13	12	12	13	13	15	13	12	6	12	12	11	11	12	12	14	12	11	6	11	51.4	51.4	49.9	45.133	391	391;418;419	1	184
Q60739	Q60739	4	4	4	BAG family molecular chaperone regulator 1	Bag1	sp|Q60739|BAG1_MOUSE BAG family molecular chaperone regulator 1 OS=Mus musculus OX=10090 GN=Bag1 PE=1 SV=3	1	4	4	4	1	1	2	1	1	2	2	2	1	4	1	1	2	1	1	2	2	2	1	4	1	1	2	1	1	2	2	2	1	4	13	13	13	39.74	355	355	1	17
Q60749;Q9WU01;Q9R226	Q60749	17;3;2	17;3;2	17;3;2	KH domain-containing, RNA-binding, signal transduction-associated protein 1	Khdrbs1	sp|Q60749|KHDR1_MOUSE KH domain-containing, RNA-binding, signal transduction-associated protein 1 OS=Mus musculus OX=10090 GN=Khdrbs1 PE=1 SV=2	3	17	17	17	12	15	13	12	16	16	16	17	11	16	12	15	13	12	16	16	16	17	11	16	12	15	13	12	16	16	16	17	11	16	36.6	36.6	36.6	48.37	443	443;349;346	1	204
Q60775	Q60775	8	7	7	ETS-related transcription factor Elf-1	Elf1	sp|Q60775|ELF1_MOUSE ETS-related transcription factor Elf-1 OS=Mus musculus OX=10090 GN=Elf1 PE=1 SV=1	1	8	7	7	3	6	6	7	7	7	8	7	1	7	2	5	6	6	6	7	7	7	1	7	2	5	6	6	6	7	7	7	1	7	26.6	25.7	25.7	66.22	612	612	1	56
Q60809	Q60809	3	3	3	CCR4-NOT transcription complex subunit 7	Cnot7	sp|Q60809|CNOT7_MOUSE CCR4-NOT transcription complex subunit 7 OS=Mus musculus OX=10090 GN=Cnot7 PE=1 SV=1	1	3	3	3	2	2	1	0	1	3	2	2	1	3	2	2	1	0	1	3	2	2	1	3	2	2	1	0	1	3	2	2	1	3	15.4	15.4	15.4	32.718	285	285	1	17
Q60821	Q60821	3	3	3	Zinc finger and BTB domain-containing protein 17	Zbtb17	sp|Q60821|ZBT17_MOUSE Zinc finger and BTB domain-containing protein 17 OS=Mus musculus OX=10090 GN=Zbtb17 PE=1 SV=2	1	3	3	3	3	2	1	2	1	2	1	2	0	3	3	2	1	2	1	2	1	2	0	3	3	2	1	2	1	2	1	2	0	3	3.9	3.9	3.9	86.757	794	794	1	17
Q60848	Q60848	3	3	3	Lymphocyte-specific helicase	Hells	sp|Q60848|HELLS_MOUSE Lymphocyte-specific helicase OS=Mus musculus OX=10090 GN=Hells PE=1 SV=2	1	3	3	3	2	1	1	1	1	2	1	1	1	3	2	1	1	1	1	2	1	1	1	3	2	1	1	1	1	2	1	1	1	3	4.9	4.9	4.9	95.125	821	821	1	14
Q60862	Q60862	11	11	11	Origin recognition complex subunit 2	Orc2	sp|Q60862|ORC2_MOUSE Origin recognition complex subunit 2 OS=Mus musculus OX=10090 GN=Orc2 PE=1 SV=1	1	11	11	11	5	6	4	8	4	7	4	6	4	10	5	6	4	8	4	7	4	6	4	10	5	6	4	8	4	7	4	6	4	10	23.8	23.8	23.8	65.893	576	576	1	59
Q60864	Q60864	39	39	39	Stress-induced-phosphoprotein 1	Stip1	sp|Q60864|STIP1_MOUSE Stress-induced-phosphoprotein 1 OS=Mus musculus OX=10090 GN=Stip1 PE=1 SV=1	1	39	39	39	30	31	34	35	37	38	37	37	28	36	30	31	34	35	37	38	37	37	28	36	30	31	34	35	37	38	37	37	28	36	62.6	62.6	62.6	62.581	543	543	1	491
Q60865	Q60865	21	21	21	Caprin-1	Caprin1	sp|Q60865|CAPR1_MOUSE Caprin-1 OS=Mus musculus OX=10090 GN=Caprin1 PE=1 SV=2	1	21	21	21	13	16	15	16	14	18	17	18	11	17	13	16	15	16	14	18	17	18	11	17	13	16	15	16	14	18	17	18	11	17	44.8	44.8	44.8	78.168	707	707	1	207
Q60870	Q60870	3	3	3	Receptor expression-enhancing protein 5	Reep5	sp|Q60870|REEP5_MOUSE Receptor expression-enhancing protein 5 OS=Mus musculus OX=10090 GN=Reep5 PE=1 SV=1	1	3	3	3	2	3	3	3	2	1	0	2	1	3	2	3	3	3	2	1	0	2	1	3	2	3	3	3	2	1	0	2	1	3	14.6	14.6	14.6	21.05	185	185	1	20
Q60872;Q8BX20;Q3UTA4;Q3TQZ4;J3QP87;A0A1Y7VK80;A0A1Y7VJE9;Q3UT53;J3QQ02;J3QPI8;J3QMW5;A0A1Y7VLT7	Q60872;Q8BX20;Q3UTA4;Q3TQZ4;J3QP87;A0A1Y7VK80;A0A1Y7VJE9;Q3UT53;J3QQ02;J3QPI8;J3QMW5;A0A1Y7VLT7	4;3;3;3;3;3;3;2;2;2;2;2	2;2;2;2;2;2;2;1;1;1;1;1	1;1;1;1;1;1;1;1;1;1;1;1	Eukaryotic translation initiation factor 1A	Eif1a;Gm5662;Gm8300;Gm2016;Gm2035;Gm4027;Gm2056;Gm6803;Gm2075	sp|Q60872|IF1A_MOUSE Eukaryotic translation initiation factor 1A OS=Mus musculus OX=10090 GN=Eif1a PE=2 SV=3;tr|Q8BX20|Q8BX20_MOUSE Eukaryotic translation initiation factor 4C OS=Mus musculus OX=10090 GN=Eif1ad7 PE=2 SV=1;tr|Q3UTA4|Q3UTA4_MOUSE Eukaryotic	12	4	2	1	3	2	3	2	2	4	4	2	1	4	1	1	2	1	1	2	2	2	0	2	1	1	1	0	1	1	1	1	0	1	31.9	17.4	9.7	16.502	144	144;144;144;144;144;144;144;144;144;144;144;144	1	14
Q60875	Q60875	15	15	15	Rho guanine nucleotide exchange factor 2	Arhgef2	sp|Q60875|ARHG2_MOUSE Rho guanine nucleotide exchange factor 2 OS=Mus musculus OX=10090 GN=Arhgef2 PE=1 SV=4	1	15	15	15	10	13	5	7	4	14	8	7	3	12	10	13	5	7	4	14	8	7	3	12	10	13	5	7	4	14	8	7	3	12	22.3	22.3	22.3	111.97	985	985	1	87
Q60899;Q61701;Q60900	Q60899;Q61701	14;8;5	13;7;5	13;7;5	ELAV-like protein 2;ELAV-like protein 4	Elavl2;Elavl4	sp|Q60899|ELAV2_MOUSE ELAV-like protein 2 OS=Mus musculus OX=10090 GN=Elavl2 PE=1 SV=1;sp|Q61701|ELAV4_MOUSE ELAV-like protein 4 OS=Mus musculus OX=10090 GN=Elavl4 PE=1 SV=1	3	14	13	13	9	11	9	8	7	12	11	12	7	10	8	10	8	7	6	11	10	11	6	9	8	10	8	7	6	11	10	11	6	9	44.4	41.9	41.9	39.577	360	360;385;367	1	93
Q60902	Q60902	25	25	25	Epidermal growth factor receptor substrate 15-like 1	Eps15l1	sp|Q60902|EP15R_MOUSE Epidermal growth factor receptor substrate 15-like 1 OS=Mus musculus OX=10090 GN=Eps15l1 PE=1 SV=3	1	25	25	25	11	17	16	11	10	19	21	21	5	19	11	17	16	11	10	19	21	21	5	19	11	17	16	11	10	19	21	21	5	19	35.7	35.7	35.7	99.307	907	907	1	156
Q60930	Q60930	8	8	8	Voltage-dependent anion-selective channel protein 2	Vdac2	sp|Q60930|VDAC2_MOUSE Voltage-dependent anion-selective channel protein 2 OS=Mus musculus OX=10090 GN=Vdac2 PE=1 SV=2	1	8	8	8	8	8	8	7	6	6	4	1	1	5	8	8	8	7	6	6	4	1	1	5	8	8	8	7	6	6	4	1	1	5	35.6	35.6	35.6	31.732	295	295	1	55
Q60931	Q60931	10	10	10	Voltage-dependent anion-selective channel protein 3	Vdac3	sp|Q60931|VDAC3_MOUSE Voltage-dependent anion-selective channel protein 3 OS=Mus musculus OX=10090 GN=Vdac3 PE=1 SV=1	1	10	10	10	9	8	7	7	7	4	3	4	3	2	9	8	7	7	7	4	3	4	3	2	9	8	7	7	7	4	3	4	3	2	47.3	47.3	47.3	30.752	283	283	1	54
Q60932	Q60932	12	12	12	Voltage-dependent anion-selective channel protein 1	Vdac1	sp|Q60932|VDAC1_MOUSE Voltage-dependent anion-selective channel protein 1 OS=Mus musculus OX=10090 GN=Vdac1 PE=1 SV=3	1	12	12	12	9	10	11	10	9	8	6	3	4	5	9	10	11	10	9	8	6	3	4	5	9	10	11	10	9	8	6	3	4	5	48.3	48.3	48.3	32.351	296	296	1	77
Q60954;P97367;P97368	Q60954;P97367	13;7;4	13;7;4	13;7;4	Homeobox protein Meis1;Homeobox protein Meis2	Meis1;Meis2	sp|Q60954|MEIS1_MOUSE Homeobox protein Meis1 OS=Mus musculus OX=10090 GN=Meis1 PE=1 SV=1;sp|P97367|MEIS2_MOUSE Homeobox protein Meis2 OS=Mus musculus OX=10090 GN=Meis2 PE=1 SV=2	3	13	13	13	9	8	11	8	7	12	8	10	1	10	9	8	11	8	7	12	8	10	1	10	9	8	11	8	7	12	8	10	1	10	46.2	46.2	46.2	43.002	390	390;477;378	1	90
Q60960	Q60960	11	5	5	Importin subunit alpha-5;Importin subunit alpha-5, N-terminally processed	Kpna1	sp|Q60960|IMA5_MOUSE Importin subunit alpha-5 OS=Mus musculus OX=10090 GN=Kpna1 PE=1 SV=2	1	11	5	5	7	7	7	8	6	8	6	7	2	8	2	2	2	3	1	3	1	2	0	4	2	2	2	3	1	3	1	2	0	4	28.4	17.5	17.5	60.182	538	538	1	20
Q60972	Q60972	19	14	14	Histone-binding protein RBBP4	Rbbp4	sp|Q60972|RBBP4_MOUSE Histone-binding protein RBBP4 OS=Mus musculus OX=10090 GN=Rbbp4 PE=1 SV=5	1	19	14	14	13	14	15	15	15	16	16	16	17	17	8	9	10	10	10	11	11	11	12	12	8	9	10	10	10	11	11	11	12	12	71.8	66.4	66.4	47.655	425	425	1	157
Q60973	Q60973	20	20	15	Histone-binding protein RBBP7	Rbbp7	sp|Q60973|RBBP7_MOUSE Histone-binding protein RBBP7 OS=Mus musculus OX=10090 GN=Rbbp7 PE=1 SV=1	1	20	20	15	13	15	16	14	15	17	17	18	14	20	13	15	16	14	15	17	17	18	14	20	8	10	11	9	10	12	12	13	9	15	74.4	74.4	68.9	47.789	425	425	1	234
Q60974	Q60974	15	13	13	Nuclear receptor corepressor 1	Ncor1	sp|Q60974|NCOR1_MOUSE Nuclear receptor corepressor 1 OS=Mus musculus OX=10090 GN=Ncor1 PE=1 SV=1	1	15	13	13	3	4	5	2	2	10	6	9	1	13	2	3	4	1	1	9	5	7	0	12	2	3	4	1	1	9	5	7	0	12	8.4	7.7	7.7	270.64	2453	2453	1	44
Q60996;Q7TNL5	Q60996	4;1	4;1	3;1	Serine/threonine-protein phosphatase 2A 56 kDa regulatory subunit gamma isoform	Ppp2r5c	sp|Q60996|2A5G_MOUSE Serine/threonine-protein phosphatase 2A 56 kDa regulatory subunit gamma isoform OS=Mus musculus OX=10090 GN=Ppp2r5c PE=1 SV=2	2	4	4	3	1	0	2	1	2	3	3	3	1	4	1	0	2	1	2	3	3	3	1	4	1	0	2	1	2	3	3	3	1	3	9.7	9.7	6.5	60.824	524	524;595	1	20
Q61009	Q61009	1	1	1	Scavenger receptor class B member 1	Scarb1	sp|Q61009|SCRB1_MOUSE Scavenger receptor class B member 1 OS=Mus musculus OX=10090 GN=Scarb1 PE=1 SV=1	1	1	1	1	1	1	0	0	1	1	0	1	0	1	1	1	0	0	1	1	0	1	0	1	1	1	0	0	1	1	0	1	0	1	6.1	6.1	6.1	56.753	509	509	1	6
Q61024	Q61024	11	11	11	Asparagine synthetase [glutamine-hydrolyzing]	Asns	sp|Q61024|ASNS_MOUSE Asparagine synthetase [glutamine-hydrolyzing] OS=Mus musculus OX=10090 GN=Asns PE=1 SV=3	1	11	11	11	4	7	5	3	4	5	4	7	2	11	4	7	5	3	4	5	4	7	2	11	4	7	5	3	4	5	4	7	2	11	30.7	30.7	30.7	64.282	561	561	1	55
Q61033	Q61033	31	31	31	Lamina-associated polypeptide 2, isoforms alpha/zeta	Tmpo	sp|Q61033|LAP2A_MOUSE Lamina-associated polypeptide 2, isoforms alpha/zeta OS=Mus musculus OX=10090 GN=Tmpo PE=1 SV=4	1	31	31	31	22	25	22	18	21	26	27	28	17	26	22	25	22	18	21	26	27	28	17	26	22	25	22	18	21	26	27	28	17	26	66.5	66.5	66.5	75.167	693	693	1	275
Q61039;Q64279	Q61039	5;1	5;1	5;1	Heart- and neural crest derivatives-expressed protein 2	Hand2	sp|Q61039|HAND2_MOUSE Heart- and neural crest derivatives-expressed protein 2 OS=Mus musculus OX=10090 GN=Hand2 PE=1 SV=3	2	5	5	5	2	4	3	1	1	4	2	3	1	3	2	4	3	1	1	4	2	3	1	3	2	4	3	1	1	4	2	3	1	3	35.9	35.9	35.9	23.665	217	217;216	1	24
Q61048	Q61048	4	4	4	WW domain-binding protein 4	Wbp4	sp|Q61048|WBP4_MOUSE WW domain-binding protein 4 OS=Mus musculus OX=10090 GN=Wbp4 PE=1 SV=4	1	4	4	4	2	3	4	1	2	4	3	4	1	3	2	3	4	1	2	4	3	4	1	3	2	3	4	1	2	4	3	4	1	3	14.6	14.6	14.6	42.136	376	376	1	27
Q61069	Q61069	6	6	5	Upstream stimulatory factor 1	Usf1	sp|Q61069|USF1_MOUSE Upstream stimulatory factor 1 OS=Mus musculus OX=10090 GN=Usf1 PE=1 SV=1	1	6	6	5	4	3	4	4	4	5	4	4	2	4	4	3	4	4	4	5	4	4	2	4	3	3	3	3	3	4	3	3	1	3	21.9	21.9	18.7	33.57	310	310	1	43
Q61081	Q61081	6	6	6	Hsp90 co-chaperone Cdc37;Hsp90 co-chaperone Cdc37, N-terminally processed	Cdc37	sp|Q61081|CDC37_MOUSE Hsp90 co-chaperone Cdc37 OS=Mus musculus OX=10090 GN=Cdc37 PE=1 SV=1	1	6	6	6	2	4	4	3	2	5	6	5	2	5	2	4	4	3	2	5	6	5	2	5	2	4	4	3	2	5	6	5	2	5	18.7	18.7	18.7	44.593	379	379	1	38
Q61103	Q61103	14	14	13	Zinc finger protein ubi-d4	Dpf2	sp|Q61103|REQU_MOUSE Zinc finger protein ubi-d4 OS=Mus musculus OX=10090 GN=Dpf2 PE=1 SV=1	1	14	14	13	9	10	9	8	8	10	10	11	3	9	9	10	9	8	8	10	10	11	3	9	8	9	8	7	7	9	9	10	2	8	46.5	46.5	44.8	44.229	391	391	1	90
Q61122;Q61127	Q61122	4;1	4;1	4;1	NGFI-A-binding protein 1	Nab1	sp|Q61122|NAB1_MOUSE NGFI-A-binding protein 1 OS=Mus musculus OX=10090 GN=Nab1 PE=1 SV=2	2	4	4	4	0	1	0	0	0	1	2	2	1	4	0	1	0	0	0	1	2	2	1	4	0	1	0	0	0	1	2	2	1	4	9.3	9.3	9.3	54.009	486	486;525	1	11
Q61136	Q61136	14	14	14	Serine/threonine-protein kinase PRP4 homolog	Prpf4b	sp|Q61136|PRP4B_MOUSE Serine/threonine-protein kinase PRP4 homolog OS=Mus musculus OX=10090 GN=Prpf4b PE=1 SV=3	1	14	14	14	9	8	8	9	9	10	10	10	2	13	9	8	8	9	9	10	10	10	2	13	9	8	8	9	9	10	10	10	2	13	17.8	17.8	17.8	116.97	1007	1007	1	102
Q61166	Q61166	17	17	15	Microtubule-associated protein RP/EB family member 1	Mapre1	sp|Q61166|MARE1_MOUSE Microtubule-associated protein RP/EB family member 1 OS=Mus musculus OX=10090 GN=Mapre1 PE=1 SV=3	1	17	17	15	9	13	12	13	13	13	12	13	8	16	9	13	12	13	13	13	12	13	8	16	8	11	10	12	11	12	11	11	7	14	74.3	74.3	70.9	30.016	268	268	1	154
Q61171	Q61171	14	14	14	Peroxiredoxin-2	Prdx2	sp|Q61171|PRDX2_MOUSE Peroxiredoxin-2 OS=Mus musculus OX=10090 GN=Prdx2 PE=1 SV=3	1	14	14	14	5	12	10	5	7	10	11	14	7	12	5	12	10	5	7	10	11	14	7	12	5	12	10	5	7	10	11	14	7	12	74.7	74.7	74.7	21.778	198	198	1	98
Q61176	Q61176	1	1	1	Arginase-1	Arg1	sp|Q61176|ARGI1_MOUSE Arginase-1 OS=Mus musculus OX=10090 GN=Arg1 PE=1 SV=1	1	1	1	1	0	0	0	0	1	0	1	0	1	1	0	0	0	0	1	0	1	0	1	1	0	0	0	0	1	0	1	0	1	1	3.4	3.4	3.4	34.807	323	323	1	4
Q61187	Q61187	13	13	13	Tumor susceptibility gene 101 protein	Tsg101	sp|Q61187|TS101_MOUSE Tumor susceptibility gene 101 protein OS=Mus musculus OX=10090 GN=Tsg101 PE=1 SV=2	1	13	13	13	7	8	9	6	5	11	10	10	2	9	7	8	9	6	5	11	10	10	2	9	7	8	9	6	5	11	10	10	2	9	32.7	32.7	32.7	44.123	391	391	1	81
Q61189	Q61189	1	1	1	Methylosome subunit pICln	Clns1a	sp|Q61189|ICLN_MOUSE Methylosome subunit pICln OS=Mus musculus OX=10090 GN=Clns1a PE=1 SV=1	1	1	1	1	1	0	0	1	1	1	1	1	0	1	1	0	0	1	1	1	1	1	0	1	1	0	0	1	1	1	1	1	0	1	5.5	5.5	5.5	26.021	236	236	1	7
Q61191	Q61191	57	57	56	Host cell factor 1;HCF N-terminal chain 1;HCF N-terminal chain 2;HCF N-terminal chain 3;HCF N-terminal chain 4;HCF N-terminal chain 5;HCF N-terminal chain 6;HCF C-terminal chain 1;HCF C-terminal chain 2;HCF C-terminal chain 3;HCF C-terminal chain 4;HCF C-terminal chain 5;HCF C-terminal chain 6	Hcfc1	sp|Q61191|HCFC1_MOUSE Host cell factor 1 OS=Mus musculus OX=10090 GN=Hcfc1 PE=1 SV=2	1	57	57	56	32	44	40	37	31	49	47	50	40	52	32	44	40	37	31	49	47	50	40	52	31	43	39	36	30	48	46	49	39	51	39.9	39.9	39.5	210.43	2045	2045	1	557
Q61205	Q61205	3	3	3	Platelet-activating factor acetylhydrolase IB subunit gamma	Pafah1b3	sp|Q61205|PA1B3_MOUSE Platelet-activating factor acetylhydrolase IB subunit alpha1 OS=Mus musculus OX=10090 GN=Pafah1b3 PE=1 SV=1	1	3	3	3	0	1	0	0	0	1	0	1	0	3	0	1	0	0	0	1	0	1	0	3	0	1	0	0	0	1	0	1	0	3	17.7	17.7	17.7	25.853	232	232	1	6
Q61206	Q61206	2	2	2	Platelet-activating factor acetylhydrolase IB subunit beta	Pafah1b2	sp|Q61206|PA1B2_MOUSE Platelet-activating factor acetylhydrolase IB subunit alpha2 OS=Mus musculus OX=10090 GN=Pafah1b2 PE=1 SV=2	1	2	2	2	1	2	2	0	0	1	1	1	0	2	1	2	2	0	0	1	1	1	0	2	1	2	2	0	0	1	1	1	0	2	12.2	12.2	12.2	25.581	229	229	1	10
Q61207	Q61207	12	12	12	Prosaposin	Psap	sp|Q61207|SAP_MOUSE Prosaposin OS=Mus musculus OX=10090 GN=Psap PE=1 SV=2	1	12	12	12	8	12	11	8	9	12	11	11	6	10	8	12	11	8	9	12	11	11	6	10	8	12	11	8	9	12	11	11	6	10	25.3	25.3	25.3	61.422	557	557	1	110
Q61211	Q61211	2	2	2	Eukaryotic translation initiation factor 2D	Eif2d	sp|Q61211|EIF2D_MOUSE Eukaryotic translation initiation factor 2D OS=Mus musculus OX=10090 GN=Eif2d PE=1 SV=3	1	2	2	2	0	0	0	0	0	0	0	0	0	2	0	0	0	0	0	0	0	0	0	2	0	0	0	0	0	0	0	0	0	2	7.4	7.4	7.4	62.829	570	570	1	2
Q61216	Q61216	18	18	18	Double-strand break repair protein MRE11A	Mre11a	sp|Q61216|MRE11_MOUSE Double-strand break repair protein MRE11 OS=Mus musculus OX=10090 GN=Mre11 PE=1 SV=1	1	18	18	18	10	15	13	11	11	16	14	17	6	16	10	15	13	11	11	16	14	17	6	16	10	15	13	11	11	16	14	17	6	16	31.3	31.3	31.3	80.222	706	706	1	134
Q61234	Q61234	2	2	2	Alpha-1-syntrophin	Snta1	sp|Q61234|SNTA1_MOUSE Alpha-1-syntrophin OS=Mus musculus OX=10090 GN=Snta1 PE=1 SV=1	1	2	2	2	2	2	1	1	0	2	2	2	1	2	2	2	1	1	0	2	2	2	1	2	2	2	1	1	0	2	2	2	1	2	3.6	3.6	3.6	53.664	503	503	1	16
Q61235	Q61235	5	5	5	Beta-2-syntrophin	Sntb2	sp|Q61235|SNTB2_MOUSE Beta-2-syntrophin OS=Mus musculus OX=10090 GN=Sntb2 PE=1 SV=2	1	5	5	5	1	2	2	1	1	3	2	3	1	4	1	2	2	1	1	3	2	3	1	4	1	2	2	1	1	3	2	3	1	4	11.9	11.9	11.9	56.381	520	520	1	20
Q61239	Q61239	1	1	1	Protein farnesyltransferase/geranylgeranyltransferase type-1 subunit alpha	Fnta	sp|Q61239|FNTA_MOUSE Protein farnesyltransferase/geranylgeranyltransferase type-1 subunit alpha OS=Mus musculus OX=10090 GN=Fnta PE=1 SV=1	1	1	1	1	0	0	0	0	0	0	0	0	0	1	0	0	0	0	0	0	0	0	0	1	0	0	0	0	0	0	0	0	0	1	4.8	4.8	4.8	44.013	377	377	1	1
Q61249;Q9QZ29	Q61249	6;1	6;1	6;1	Immunoglobulin-binding protein 1	Igbp1	sp|Q61249|IGBP1_MOUSE Immunoglobulin-binding protein 1 OS=Mus musculus OX=10090 GN=Igbp1 PE=1 SV=1	2	6	6	6	2	4	3	2	4	5	4	5	1	4	2	4	3	2	4	5	4	5	1	4	2	4	3	2	4	5	4	5	1	4	22.9	22.9	22.9	38.97	340	340;343	1	34
Q61301	Q61301	4	1	1	Catenin alpha-2	Ctnna2	sp|Q61301|CTNA2_MOUSE Catenin alpha-2 OS=Mus musculus OX=10090 GN=Ctnna2 PE=1 SV=3	1	4	1	1	2	4	3	2	3	4	4	4	2	4	0	1	1	1	1	1	1	1	1	1	0	1	1	1	1	1	1	1	1	1	5.1	1.9	1.9	105.28	953	953	1	15
Q61316;REV__Q9DBV3	Q61316	25;1	24;1	23;1	Heat shock 70 kDa protein 4	Hspa4	sp|Q61316|HSP74_MOUSE Heat shock 70 kDa protein 4 OS=Mus musculus OX=10090 GN=Hspa4 PE=1 SV=1	2	25	24	23	11	10	14	12	10	19	19	17	8	22	10	9	13	11	9	18	18	16	7	21	9	9	12	11	9	17	18	16	7	20	43.8	42.1	40.2	94.132	841	841;1145	1	143
Q61321;P70178	Q61321	4;1	4;1	4;1	Homeobox protein SIX4	Six4	sp|Q61321|SIX4_MOUSE Homeobox protein SIX4 OS=Mus musculus OX=10090 GN=Six4 PE=1 SV=1	2	4	4	4	1	2	1	0	0	3	3	4	0	4	1	2	1	0	0	3	3	4	0	4	1	2	1	0	0	3	3	4	0	4	7.1	7.1	7.1	82.262	775	775;719	1	18
Q61334	Q61334	1	1	1	B-cell receptor-associated protein 29	Bcap29	sp|Q61334|BAP29_MOUSE B-cell receptor-associated protein 29 OS=Mus musculus OX=10090 GN=Bcap29 PE=1 SV=1	1	1	1	1	1	1	1	1	0	1	1	0	0	0	1	1	1	1	0	1	1	0	0	0	1	1	1	1	0	1	1	0	0	0	3.8	3.8	3.8	27.964	240	240	1	6
Q61335	Q61335	6	6	6	B-cell receptor-associated protein 31	Bcap31	sp|Q61335|BAP31_MOUSE B-cell receptor-associated protein 31 OS=Mus musculus OX=10090 GN=Bcap31 PE=1 SV=4	1	6	6	6	4	6	4	4	4	4	5	5	2	5	4	6	4	4	4	4	5	5	2	5	4	6	4	4	4	4	5	5	2	5	22.9	22.9	22.9	27.956	245	245	1	60
Q61390	Q61390	7	2	2	T-complex protein 1 subunit zeta-2	Cct6b	sp|Q61390|TCPW_MOUSE T-complex protein 1 subunit zeta-2 OS=Mus musculus OX=10090 GN=Cct6b PE=1 SV=4	1	7	2	2	6	7	7	5	5	6	6	6	2	7	1	2	2	0	1	2	1	2	0	2	1	2	2	0	1	2	1	2	0	2	13.7	4.9	4.9	58.184	531	531	1	13
Q61425	Q61425	1	1	1	Hydroxyacyl-coenzyme A dehydrogenase, mitochondrial	Hadh	sp|Q61425|HCDH_MOUSE Hydroxyacyl-coenzyme A dehydrogenase, mitochondrial OS=Mus musculus OX=10090 GN=Hadh PE=1 SV=2	1	1	1	1	1	1	1	0	0	1	1	1	0	1	1	1	1	0	0	1	1	1	0	1	1	1	1	0	0	1	1	1	0	1	3.5	3.5	3.5	34.463	314	314	1	7
Q61458	Q61458	1	1	1	Cyclin-H	Ccnh	sp|Q61458|CCNH_MOUSE Cyclin-H OS=Mus musculus OX=10090 GN=Ccnh PE=1 SV=2	1	1	1	1	0	0	0	0	0	0	0	0	0	1	0	0	0	0	0	0	0	0	0	1	0	0	0	0	0	0	0	0	0	1	3.4	3.4	3.4	37.506	323	323	1	1
Q61464	Q61464	21	21	21	Zinc finger protein 638	Znf638	sp|Q61464|ZN638_MOUSE Zinc finger protein 638 OS=Mus musculus OX=10090 GN=Znf638 PE=1 SV=2	1	21	21	21	9	12	13	12	8	18	12	18	5	20	9	12	13	12	8	18	12	18	5	20	9	12	13	12	8	18	12	18	5	20	17.3	17.3	17.3	218.13	1960	1960	1	135
Q61466	Q61466	26	26	21	SWI/SNF-related matrix-associated actin-dependent regulator of chromatin subfamily D member 1	Smarcd1	sp|Q61466|SMRD1_MOUSE SWI/SNF-related matrix-associated actin-dependent regulator of chromatin subfamily D member 1 OS=Mus musculus OX=10090 GN=Smarcd1 PE=1 SV=3	1	26	26	21	17	21	19	18	19	24	18	22	9	23	17	21	19	18	19	24	18	22	9	23	14	18	16	15	15	20	15	18	8	18	56.3	56.3	48.7	58.244	515	515	1	213
Q61474	Q61474	13	13	12	RNA-binding protein Musashi homolog 1	Msi1	sp|Q61474|MSI1H_MOUSE RNA-binding protein Musashi homolog 1 OS=Mus musculus OX=10090 GN=Msi1 PE=1 SV=1	1	13	13	12	8	9	9	7	4	12	12	10	4	11	8	9	9	7	4	12	12	10	4	11	7	8	8	6	3	11	11	9	4	10	56.4	56.4	53	39.119	362	362	1	103
Q7TSF1;Q61495;Q7TSF0	Q7TSF1;Q61495;Q7TSF0	4;4;2	4;4;2	4;4;2	Desmoglein-1-beta;Desmoglein-1-alpha;Desmoglein-1-gamma	Dsg1b;Dsg1a;Dsg1c	sp|Q7TSF1|DSG1B_MOUSE Desmoglein-1-beta OS=Mus musculus OX=10090 GN=Dsg1b PE=1 SV=1;sp|Q61495|DSG1A_MOUSE Desmoglein-1-alpha OS=Mus musculus OX=10090 GN=Dsg1a PE=2 SV=2;sp|Q7TSF0|DSG1C_MOUSE Desmoglein-1-gamma OS=Mus musculus OX=10090 GN=Dsg1c PE=1 SV=1	3	4	4	4	2	1	0	0	2	1	3	0	0	4	2	1	0	0	2	1	3	0	0	4	2	1	0	0	2	1	3	0	0	4	3.3	3.3	3.3	114.45	1060	1060;1057;911	1	13
Q61502	Q61502	2	2	2	Transcription factor E2F5	E2f5	sp|Q61502|E2F5_MOUSE Transcription factor E2F5 OS=Mus musculus OX=10090 GN=E2f5 PE=1 SV=2	1	2	2	2	0	2	1	2	1	2	1	2	0	1	0	2	1	2	1	2	1	2	0	1	0	2	1	2	1	2	1	2	0	1	6.9	6.9	6.9	36.555	335	335	1	12
Q61510	Q61510	1	1	1	E3 ubiquitin/ISG15 ligase TRIM25	Trim25	sp|Q61510|TRI25_MOUSE E3 ubiquitin/ISG15 ligase TRIM25 OS=Mus musculus OX=10090 GN=Trim25 PE=1 SV=2	1	1	1	1	0	0	0	0	0	0	0	0	0	1	0	0	0	0	0	0	0	0	0	1	0	0	0	0	0	0	0	0	0	1	2.8	2.8	2.8	71.726	634	634	1	1
Q61543	Q61543	7	7	7	Golgi apparatus protein 1	Glg1	sp|Q61543|GSLG1_MOUSE Golgi apparatus protein 1 OS=Mus musculus OX=10090 GN=Glg1 PE=1 SV=1	1	7	7	7	5	6	5	3	3	3	2	3	1	6	5	6	5	3	3	3	2	3	1	6	5	6	5	3	3	3	2	3	1	6	7.4	7.4	7.4	133.73	1175	1175	1	37
Q61545	Q61545	5	5	5	RNA-binding protein EWS	Ewsr1	sp|Q61545|EWS_MOUSE RNA-binding protein EWS OS=Mus musculus OX=10090 GN=Ewsr1 PE=1 SV=2	1	5	5	5	4	4	4	4	4	4	4	4	4	4	4	4	4	4	4	4	4	4	4	4	4	4	4	4	4	4	4	4	4	4	10.1	10.1	10.1	68.461	655	655	1	64
Q61548	Q61548	6	5	5	Clathrin coat assembly protein AP180	Snap91	sp|Q61548|AP180_MOUSE Clathrin coat assembly protein AP180 OS=Mus musculus OX=10090 GN=Snap91 PE=1 SV=1	1	6	5	5	2	6	4	4	1	4	4	4	1	6	2	5	4	3	1	4	3	4	0	5	2	5	4	3	1	4	3	4	0	5	10.7	9.3	9.3	91.85	901	901	1	36
Q61550;A2AU37	Q61550	15;1	15;1	15;1	Double-strand-break repair protein rad21 homolog	Rad21	sp|Q61550|RAD21_MOUSE Double-strand-break repair protein rad21 homolog OS=Mus musculus OX=10090 GN=Rad21 PE=1 SV=3	2	15	15	15	7	7	8	8	7	9	9	10	6	14	7	7	8	8	7	9	9	10	6	14	7	7	8	8	7	9	9	10	6	14	29.3	29.3	29.3	72.082	635	635;552	1	90
Q61553	Q61553	4	4	4	Fascin	Fscn1	sp|Q61553|FSCN1_MOUSE Fascin OS=Mus musculus OX=10090 GN=Fscn1 PE=1 SV=4	1	4	4	4	3	0	1	1	1	0	3	0	3	0	3	0	1	1	1	0	3	0	3	0	3	0	1	1	1	0	3	0	3	0	9.1	9.1	9.1	54.507	493	493	1	12
Q61576	Q61576	13	13	13	Peptidyl-prolyl cis-trans isomerase FKBP10	Fkbp10	sp|Q61576|FKB10_MOUSE Peptidyl-prolyl cis-trans isomerase FKBP10 OS=Mus musculus OX=10090 GN=Fkbp10 PE=1 SV=2	1	13	13	13	10	13	12	9	9	9	8	11	3	11	10	13	12	9	9	9	8	11	3	11	10	13	12	9	9	9	8	11	3	11	28.6	28.6	28.6	64.697	581	581	1	101
Q61584	Q61584	39	39	38	Fragile X mental retardation syndrome-related protein 1	Fxr1	sp|Q61584|FXR1_MOUSE Fragile X mental retardation syndrome-related protein 1 OS=Mus musculus OX=10090 GN=Fxr1 PE=1 SV=2	1	39	39	38	25	30	30	29	27	34	32	37	27	37	25	30	30	29	27	34	32	37	27	37	24	29	29	28	26	33	31	36	26	36	51.4	51.4	50.2	76.221	677	677	1	418
Q61595	Q61595	4	4	4	Kinectin	Ktn1	sp|Q61595|KTN1_MOUSE Kinectin OS=Mus musculus OX=10090 GN=Ktn1 PE=1 SV=1	1	4	4	4	3	2	3	3	3	1	1	2	1	2	3	2	3	3	3	1	1	2	1	2	3	2	3	3	3	1	1	2	1	2	3.8	3.8	3.8	152.59	1327	1327	1	21
Q61598;P50396	Q61598	4;1	4;1	4;1	Rab GDP dissociation inhibitor beta	Gdi2	sp|Q61598|GDIB_MOUSE Rab GDP dissociation inhibitor beta OS=Mus musculus OX=10090 GN=Gdi2 PE=1 SV=1	2	4	4	4	2	0	2	1	3	3	4	3	2	3	2	0	2	1	3	3	4	3	2	3	2	0	2	1	3	3	4	3	2	3	13.7	13.7	13.7	50.537	445	445;447	1	23
Q61624	Q61624	16	16	16	Zinc finger protein 148	Znf148	sp|Q61624|ZN148_MOUSE Zinc finger protein 148 OS=Mus musculus OX=10090 GN=Znf148 PE=1 SV=2	1	16	16	16	12	12	15	11	11	16	14	15	6	15	12	12	15	11	11	16	14	15	6	15	12	12	15	11	11	16	14	15	6	15	34.1	34.1	34.1	88.75	794	794	1	134
Q61655;Q9QY15	Q61655	13;2	1;1	1;1	ATP-dependent RNA helicase DDX19A	Ddx19a	sp|Q61655|DD19A_MOUSE ATP-dependent RNA helicase DDX19A OS=Mus musculus OX=10090 GN=Ddx19a PE=1 SV=2	2	13	1	1	9	10	10	8	7	10	8	9	1	10	0	1	0	0	0	1	0	0	0	0	0	1	0	0	0	1	0	0	0	0	32	2.3	2.3	53.932	478	478;484	1	2
Q61656	Q61656	48	48	39	Probable ATP-dependent RNA helicase DDX5	Ddx5	sp|Q61656|DDX5_MOUSE Probable ATP-dependent RNA helicase DDX5 OS=Mus musculus OX=10090 GN=Ddx5 PE=1 SV=2	1	48	48	39	36	38	38	38	37	43	44	42	40	45	36	38	38	38	37	43	44	42	40	45	29	30	29	30	29	34	35	33	32	36	70.8	70.8	60.6	69.289	614	614	1	551
Q61686	Q61686	7	7	6	Chromobox protein homolog 5	Cbx5	sp|Q61686|CBX5_MOUSE Chromobox protein homolog 5 OS=Mus musculus OX=10090 GN=Cbx5 PE=1 SV=1	1	7	7	6	7	6	6	7	6	7	7	7	4	5	7	6	6	7	6	7	7	7	4	5	6	5	5	6	5	6	6	6	3	4	46.1	46.1	39.8	22.186	191	191	1	64
Q61699	Q61699	27	27	25	Heat shock protein 105 kDa	Hsph1	sp|Q61699|HS105_MOUSE Heat shock protein 105 kDa OS=Mus musculus OX=10090 GN=Hsph1 PE=1 SV=2	1	27	27	25	22	20	21	18	16	22	23	23	17	26	22	20	21	18	16	22	23	23	17	26	20	18	19	17	15	20	22	22	16	24	38.3	38.3	36	96.406	858	858	1	247
Q61733	Q61733	2	2	2	28S ribosomal protein S31, mitochondrial	Mrps31	sp|Q61733|RT31_MOUSE 28S ribosomal protein S31, mitochondrial OS=Mus musculus OX=10090 GN=Mrps31 PE=1 SV=1	1	2	2	2	1	2	2	1	2	2	2	1	0	2	1	2	2	1	2	2	2	1	0	2	1	2	2	1	2	2	2	1	0	2	9.6	9.6	9.6	43.88	384	384	1	15
Q61749	Q61749	2	2	2	Translation initiation factor eIF-2B subunit delta	Eif2b4	sp|Q61749|EI2BD_MOUSE Translation initiation factor eIF-2B subunit delta OS=Mus musculus OX=10090 GN=Eif2b4 PE=1 SV=2	1	2	2	2	0	2	2	2	1	2	2	2	0	2	0	2	2	2	1	2	2	2	0	2	0	2	2	2	1	2	2	2	0	2	6.3	6.3	6.3	57.624	524	524	1	16
Q61753	Q61753	20	20	19	D-3-phosphoglycerate dehydrogenase	Phgdh	sp|Q61753|SERA_MOUSE D-3-phosphoglycerate dehydrogenase OS=Mus musculus OX=10090 GN=Phgdh PE=1 SV=3	1	20	20	19	15	17	16	15	16	18	17	18	10	19	15	17	16	15	16	18	17	18	10	19	14	16	15	14	15	17	16	17	9	18	43.7	43.7	42.6	56.585	533	533	1	183
Q61768;P28738;P33175	Q61768;P28738;P33175	2;1;1	2;1;1	2;1;1	Kinesin-1 heavy chain;Kinesin heavy chain isoform 5C;Kinesin heavy chain isoform 5A	Kif5b;Kif5c;Kif5a	sp|Q61768|KINH_MOUSE Kinesin-1 heavy chain OS=Mus musculus OX=10090 GN=Kif5b PE=1 SV=3;sp|P28738|KIF5C_MOUSE Kinesin heavy chain isoform 5C OS=Mus musculus OX=10090 GN=Kif5c PE=1 SV=3;sp|P33175|KIF5A_MOUSE Kinesin heavy chain isoform 5A OS=Mus musculus OX=	3	2	2	2	0	1	0	0	0	1	1	2	0	2	0	1	0	0	0	1	1	2	0	2	0	1	0	0	0	1	1	2	0	2	2.3	2.3	2.3	109.55	963	963;956;1027	1	7
Q61792	Q61792	2	2	2	LIM and SH3 domain protein 1	Lasp1	sp|Q61792|LASP1_MOUSE LIM and SH3 domain protein 1 OS=Mus musculus OX=10090 GN=Lasp1 PE=1 SV=1	1	2	2	2	1	1	1	0	0	1	2	1	1	1	1	1	1	0	0	1	2	1	1	1	1	1	1	0	0	1	2	1	1	1	10.3	10.3	10.3	29.994	263	263	1	9
Q61818	Q61818	3	3	3	Retinoic acid-induced protein 1	Rai1	sp|Q61818|RAI1_MOUSE Retinoic acid-induced protein 1 OS=Mus musculus OX=10090 GN=Rai1 PE=1 SV=3	1	3	3	3	1	2	2	2	2	2	1	2	0	2	1	2	2	2	2	2	1	2	0	2	1	2	2	2	2	2	1	2	0	2	3	3	3	201.57	1889	1889	1	17
Q61823	Q61823	12	12	12	Programmed cell death protein 4	Pdcd4	sp|Q61823|PDCD4_MOUSE Programmed cell death protein 4 OS=Mus musculus OX=10090 GN=Pdcd4 PE=1 SV=1	1	12	12	12	8	9	8	7	6	8	7	10	5	10	8	9	8	7	6	8	7	10	5	10	8	9	8	7	6	8	7	10	5	10	39.7	39.7	39.7	51.702	469	469	1	80
Q61879;B1AR69;P13542;Q02566;Q5SX39;P13541;A2AQP0;Q5SX40	Q61879	52;1;1;1;1;1;1;1	35;0;0;0;0;0;0;0	31;0;0;0;0;0;0;0	Myosin-10	Myh10	sp|Q61879|MYH10_MOUSE Myosin-10 OS=Mus musculus OX=10090 GN=Myh10 PE=1 SV=2	8	52	35	31	33	32	33	41	43	51	43	35	31	25	17	19	18	24	27	34	28	23	19	14	15	17	16	21	24	30	25	22	16	13	31.1	22.9	20.9	228.99	1976	1976;1938;1937;1938;1939;1940;1941;1942	1	235
Q61881	Q61881	9	9	9	DNA replication licensing factor MCM7	Mcm7	sp|Q61881|MCM7_MOUSE DNA replication licensing factor MCM7 OS=Mus musculus OX=10090 GN=Mcm7 PE=1 SV=1	1	9	9	9	3	7	6	3	4	5	4	4	2	9	3	7	6	3	4	5	4	4	2	9	3	7	6	3	4	5	4	4	2	9	19.6	19.6	19.6	81.21	719	719	1	49
Q61937	Q61937	17	17	17	Nucleophosmin	Npm1	sp|Q61937|NPM_MOUSE Nucleophosmin OS=Mus musculus OX=10090 GN=Npm1 PE=1 SV=1	1	17	17	17	15	12	16	15	15	12	17	16	14	14	15	12	16	15	15	12	17	16	14	14	15	12	16	15	15	12	17	16	14	14	54.1	54.1	54.1	32.56	292	292	1	553
Q61990	Q61990	18	11	11	Poly(rC)-binding protein 2	Pcbp2	sp|Q61990|PCBP2_MOUSE Poly(rC)-binding protein 2 OS=Mus musculus OX=10090 GN=Pcbp2 PE=1 SV=1	1	18	11	11	16	17	16	16	14	17	16	17	15	18	10	10	10	10	8	10	9	10	9	11	10	10	10	10	8	10	9	10	9	11	67.4	48.6	48.6	38.221	362	362	1	186
Q62018	Q62018	32	32	32	RNA polymerase-associated protein CTR9 homolog	Ctr9	sp|Q62018|CTR9_MOUSE RNA polymerase-associated protein CTR9 homolog OS=Mus musculus OX=10090 GN=Ctr9 PE=1 SV=2	1	32	32	32	18	19	11	13	8	26	21	21	15	28	18	19	11	13	8	26	21	21	15	28	18	19	11	13	8	26	21	21	15	28	35.5	35.5	35.5	133.41	1173	1173	1	187
Q62036	Q62036	2	2	2	Centrosomal protein of 131 kDa	Cep131	sp|Q62036|CP131_MOUSE Centrosomal protein of 131 kDa OS=Mus musculus OX=10090 GN=Cep131 PE=1 SV=2	1	2	2	2	2	2	1	1	1	2	1	2	1	1	2	2	1	1	1	2	1	2	1	1	2	2	1	1	1	2	1	2	1	1	2.4	2.4	2.4	120.31	1060	1060	1	14
Q62066	Q62066	10	10	6	Paired mesoderm homeobox protein 2A	Phox2a	sp|Q62066|PHX2A_MOUSE Paired mesoderm homeobox protein 2A OS=Mus musculus OX=10090 GN=Phox2a PE=2 SV=1	1	10	10	6	6	8	6	7	3	10	7	9	5	7	6	8	6	7	3	10	7	9	5	7	3	5	3	3	1	6	4	5	4	5	53.9	53.9	41.1	29.417	280	280	1	81
Q62084	Q62084	2	2	2	Protein phosphatase 1 regulatory subunit 14B	Ppp1r14b	sp|Q62084|PP14B_MOUSE Protein phosphatase 1 regulatory subunit 14B OS=Mus musculus OX=10090 GN=Ppp1r14b PE=1 SV=2	1	2	2	2	0	1	1	0	1	1	1	2	0	2	0	1	1	0	1	1	1	2	0	2	0	1	1	0	1	1	1	2	0	2	23.1	23.1	23.1	15.957	147	147	1	9
Q62093	Q62093	7	7	7	Serine/arginine-rich splicing factor 2	Srsf2	sp|Q62093|SRSF2_MOUSE Serine/arginine-rich splicing factor 2 OS=Mus musculus OX=10090 GN=Srsf2 PE=1 SV=4	1	7	7	7	5	5	5	4	5	5	5	6	4	7	5	5	5	4	5	5	5	6	4	7	5	5	5	4	5	5	5	6	4	7	32.1	32.1	32.1	25.476	221	221	1	56
Q62095;Q61496	Q62095	32;2	1;0	1;0	ATP-dependent RNA helicase DDX3Y	Ddx3y	sp|Q62095|DDX3Y_MOUSE ATP-dependent RNA helicase DDX3Y OS=Mus musculus OX=10090 GN=Ddx3y PE=1 SV=2	2	32	1	1	21	25	22	19	20	25	26	23	20	27	0	0	0	1	1	1	1	1	0	1	0	0	0	1	1	1	1	1	0	1	44.7	1.4	1.4	73.427	658	658;702	1	6
Q62141	Q62141	2	1	1	Paired amphipathic helix protein Sin3b	Sin3b	sp|Q62141|SIN3B_MOUSE Paired amphipathic helix protein Sin3b OS=Mus musculus OX=10090 GN=Sin3b PE=1 SV=2	1	2	1	1	1	1	1	1	1	1	2	1	1	2	1	1	1	1	1	1	1	0	1	1	1	1	1	1	1	1	1	0	1	1	3	0.9	0.9	126.4	1098	1098	1	12
Q62167;P16381	Q62167;P16381	42;34	41;33	11;5	ATP-dependent RNA helicase DDX3X;Putative ATP-dependent RNA helicase Pl10	Ddx3x;D1Pas1	sp|Q62167|DDX3X_MOUSE ATP-dependent RNA helicase DDX3X OS=Mus musculus OX=10090 GN=Ddx3x PE=1 SV=3;sp|P16381|DDX3L_MOUSE Putative ATP-dependent RNA helicase Pl10 OS=Mus musculus OX=10090 GN=D1Pas1 PE=1 SV=1	2	42	41	11	25	31	29	23	24	34	34	32	28	35	24	30	28	22	23	33	33	31	27	34	4	6	7	5	5	10	9	10	8	9	65.7	65.7	22.7	73.101	662	662;660	1	352
Q62172	Q62172	2	2	2	RalA-binding protein 1	Ralbp1	sp|Q62172|RBP1_MOUSE RalA-binding protein 1 OS=Mus musculus OX=10090 GN=Ralbp1 PE=1 SV=4	1	2	2	2	1	0	2	2	2	1	2	0	1	1	1	0	2	2	2	1	2	0	1	1	1	0	2	2	2	1	2	0	1	1	3.1	3.1	3.1	75.042	648	648	1	12
Q62186	Q62186	6	6	6	Translocon-associated protein subunit delta	Ssr4	sp|Q62186|SSRD_MOUSE Translocon-associated protein subunit delta OS=Mus musculus OX=10090 GN=Ssr4 PE=1 SV=1	1	6	6	6	5	5	4	5	4	0	0	1	1	1	5	5	4	5	4	0	0	1	1	1	5	5	4	5	4	0	0	1	1	1	37.2	37.2	37.2	18.936	172	172	1	26
Q62188	Q62188	12	12	9	Dihydropyrimidinase-related protein 3	Dpysl3	sp|Q62188|DPYL3_MOUSE Dihydropyrimidinase-related protein 3 OS=Mus musculus OX=10090 GN=Dpysl3 PE=1 SV=1	1	12	12	9	8	10	9	7	5	9	10	8	6	10	8	10	9	7	5	9	10	8	6	10	6	7	6	4	3	6	7	5	3	7	28.9	28.9	23.5	61.936	570	570	1	82
Q62189	Q62189	13	10	10	U1 small nuclear ribonucleoprotein A	Snrpa	sp|Q62189|SNRPA_MOUSE U1 small nuclear ribonucleoprotein A OS=Mus musculus OX=10090 GN=Snrpa PE=1 SV=3	1	13	10	10	11	12	12	9	11	12	10	11	11	11	9	9	9	7	8	9	7	8	8	8	9	9	9	7	8	9	7	8	8	8	43.6	40.4	40.4	31.835	287	287	1	147
Q62193	Q62193	6	6	6	Replication protein A 32 kDa subunit	Rpa2	sp|Q62193|RFA2_MOUSE Replication protein A 32 kDa subunit OS=Mus musculus OX=10090 GN=Rpa2 PE=1 SV=1	1	6	6	6	4	4	4	5	4	4	6	5	3	4	4	4	4	5	4	4	6	5	3	4	4	4	4	5	4	4	6	5	3	4	33.7	33.7	33.7	29.718	270	270	1	52
Q62203	Q62203	11	11	11	Splicing factor 3A subunit 2	Sf3a2	sp|Q62203|SF3A2_MOUSE Splicing factor 3A subunit 2 OS=Mus musculus OX=10090 GN=Sf3a2 PE=1 SV=2	1	11	11	11	10	10	10	9	8	9	9	11	5	10	10	10	10	9	8	9	9	11	5	10	10	10	10	9	8	9	9	11	5	10	28	28	28	49.911	475	475	1	165
Q62241	Q62241	4	4	4	U1 small nuclear ribonucleoprotein C	Snrpc	sp|Q62241|RU1C_MOUSE U1 small nuclear ribonucleoprotein C OS=Mus musculus OX=10090 GN=Snrpc PE=1 SV=1	1	4	4	4	3	3	3	3	3	3	3	3	3	4	3	3	3	3	3	3	3	3	3	4	3	3	3	3	3	3	3	3	3	4	25.2	25.2	25.2	17.364	159	159	1	43
Q62255;Q9ER74;Q8BX22	Q62255	19;4;1	19;4;1	18;3;1	Sal-like protein 3	Sall3	sp|Q62255|SALL3_MOUSE Sal-like protein 3 OS=Mus musculus OX=10090 GN=Sall3 PE=1 SV=2	3	19	19	18	11	15	13	8	9	16	13	17	1	17	11	15	13	8	9	16	13	17	1	17	10	14	12	7	8	15	12	16	1	16	19.2	19.2	18.3	138.76	1320	1320;1322;1067	1	120
Q62261;P15508;REV__H3BKQ3	Q62261	147;6;1	147;6;1	138;2;1	Spectrin beta chain, non-erythrocytic 1	Sptbn1	sp|Q62261|SPTB2_MOUSE Spectrin beta chain, non-erythrocytic 1 OS=Mus musculus OX=10090 GN=Sptbn1 PE=1 SV=2	3	147	147	138	80	114	113	104	95	120	113	137	76	144	80	114	113	104	95	120	113	137	76	144	73	107	106	98	88	112	105	128	73	135	68.9	68.9	64.9	274.22	2363	2363;2128;808	1	1489
Q62276	Q62276	5	5	5	Mediator of RNA polymerase II transcription subunit 22	Med22	sp|Q62276|MED22_MOUSE Mediator of RNA polymerase II transcription subunit 22 OS=Mus musculus OX=10090 GN=Med22 PE=1 SV=2	1	5	5	5	1	3	3	2	3	5	4	4	3	4	1	3	3	2	3	5	4	4	3	4	1	3	3	2	3	5	4	4	3	4	27.5	27.5	27.5	22.282	200	200	1	35
Q62280	Q62280	3	3	3	Protein SSXT	Ss18	sp|Q62280|SSXT_MOUSE Protein SSXT OS=Mus musculus OX=10090 GN=Ss18 PE=1 SV=2	1	3	3	3	2	2	2	2	1	2	2	2	1	3	2	2	2	2	1	2	2	2	1	3	2	2	2	2	1	2	2	2	1	3	8.6	8.6	8.6	45.864	418	418	1	19
Q62311	Q62311	16	16	16	Transcription initiation factor TFIID subunit 6	Taf6	sp|Q62311|TAF6_MOUSE Transcription initiation factor TFIID subunit 6 OS=Mus musculus OX=10090 GN=Taf6 PE=1 SV=1	1	16	16	16	5	7	8	6	2	13	13	11	5	14	5	7	8	6	2	13	13	11	5	14	5	7	8	6	2	13	13	11	5	14	36	36	36	72.673	678	678	1	85
Q62318	Q62318	32	32	32	Transcription intermediary factor 1-beta	Trim28	sp|Q62318|TIF1B_MOUSE Transcription intermediary factor 1-beta OS=Mus musculus OX=10090 GN=Trim28 PE=1 SV=3	1	32	32	32	21	28	26	27	23	28	27	28	22	29	21	28	26	27	23	28	27	28	22	29	21	28	26	27	23	28	27	28	22	29	63.4	63.4	63.4	88.846	834	834	1	380
Q62348	Q62348	4	4	4	Translin	Tsn	sp|Q62348|TSN_MOUSE Translin OS=Mus musculus OX=10090 GN=Tsn PE=1 SV=1	1	4	4	4	1	4	3	1	1	4	2	4	0	3	1	4	3	1	1	4	2	4	0	3	1	4	3	1	1	4	2	4	0	3	17.1	17.1	17.1	26.201	228	228	1	23
Q62351	Q62351	19	19	19	Transferrin receptor protein 1	Tfrc	sp|Q62351|TFR1_MOUSE Transferrin receptor protein 1 OS=Mus musculus OX=10090 GN=Tfrc PE=1 SV=1	1	19	19	19	14	16	14	16	12	13	13	13	11	14	14	16	14	16	12	13	13	13	11	14	14	16	14	16	12	13	13	13	11	14	27	27	27	85.73	763	763	1	142
Q62376	Q62376	16	16	16	U1 small nuclear ribonucleoprotein 70 kDa	Snrnp70	sp|Q62376|RU17_MOUSE U1 small nuclear ribonucleoprotein 70 kDa OS=Mus musculus OX=10090 GN=Snrnp70 PE=1 SV=2	1	16	16	16	3	9	8	6	7	13	9	14	1	13	3	9	8	6	7	13	9	14	1	13	3	9	8	6	7	13	9	14	1	13	36.8	36.8	36.8	51.991	448	448	1	95
Q62383	Q62383	6	6	5	Transcription elongation factor SPT6	Supt6h	sp|Q62383|SPT6H_MOUSE Transcription elongation factor SPT6 OS=Mus musculus OX=10090 GN=Supt6h PE=1 SV=2	1	6	6	5	3	4	4	4	3	3	0	2	0	2	3	4	4	4	3	3	0	2	0	2	3	3	3	4	2	2	0	1	0	1	4.3	4.3	3.9	199.08	1726	1726	1	25
Q62384	Q62384	7	7	7	Zinc finger protein ZPR1	Zpr1	sp|Q62384|ZPR1_MOUSE Zinc finger protein ZPR1 OS=Mus musculus OX=10090 GN=Zpr1 PE=1 SV=1	1	7	7	7	2	3	2	0	1	5	3	6	0	6	2	3	2	0	1	5	3	6	0	6	2	3	2	0	1	5	3	6	0	6	21.6	21.6	21.6	50.714	459	459	1	28
Q62393	Q62393	2	2	2	Tumor protein D52	Tpd52	sp|Q62393|TPD52_MOUSE Tumor protein D52 OS=Mus musculus OX=10090 GN=Tpd52 PE=1 SV=2	1	2	2	2	2	2	2	1	0	1	2	2	0	2	2	2	2	1	0	1	2	2	0	2	2	2	2	1	0	1	2	2	0	2	11.2	11.2	11.2	24.313	224	224	1	14
Q62418	Q62418	16	16	16	Drebrin-like protein	Dbnl	sp|Q62418|DBNL_MOUSE Drebrin-like protein OS=Mus musculus OX=10090 GN=Dbnl PE=1 SV=2	1	16	16	16	7	8	10	8	7	8	8	11	3	14	7	8	10	8	7	8	8	11	3	14	7	8	10	8	7	8	8	11	3	14	42.7	42.7	42.7	48.699	436	436	1	100
Q62419;Q62420	Q62419	8;1	8;1	8;1	Endophilin-A2	Sh3gl1	sp|Q62419|SH3G1_MOUSE Endophilin-A2 OS=Mus musculus OX=10090 GN=Sh3gl1 PE=1 SV=1	2	8	8	8	2	2	1	1	0	4	2	5	0	6	2	2	1	1	0	4	2	5	0	6	2	2	1	1	0	4	2	5	0	6	35.9	35.9	35.9	41.518	368	368;352	1	23
Q62425	Q62425	1	1	1	Cytochrome c oxidase subunit NDUFA4	Ndufa4	sp|Q62425|NDUA4_MOUSE Cytochrome c oxidase subunit NDUFA4 OS=Mus musculus OX=10090 GN=Ndufa4 PE=1 SV=2	1	1	1	1	1	1	1	0	1	0	0	0	0	0	1	1	1	0	1	0	0	0	0	0	1	1	1	0	1	0	0	0	0	0	12.2	12.2	12.2	9.3267	82	82	1	4
Q62432;Q8BUN5;Q9JIW5	Q62432	3;1;1	3;1;1	3;1;1	Mothers against decapentaplegic homolog 2	Smad2	sp|Q62432|SMAD2_MOUSE Mothers against decapentaplegic homolog 2 OS=Mus musculus OX=10090 GN=Smad2 PE=1 SV=2	3	3	3	3	0	3	1	0	0	2	0	1	0	2	0	3	1	0	0	2	0	1	0	2	0	3	1	0	0	2	0	1	0	2	10.7	10.7	10.7	52.265	467	467;425;430	1	9
Q62446	Q62446	9	9	9	Peptidyl-prolyl cis-trans isomerase FKBP3	Fkbp3	sp|Q62446|FKBP3_MOUSE Peptidyl-prolyl cis-trans isomerase FKBP3 OS=Mus musculus OX=10090 GN=Fkbp3 PE=1 SV=2	1	9	9	9	6	6	6	6	5	7	8	8	5	9	6	6	6	6	5	7	8	8	5	9	6	6	6	6	5	7	8	8	5	9	47.3	47.3	47.3	25.147	224	224	1	90
Q62447	Q62447	3	3	3	Cyclin-C	Ccnc	sp|Q62447|CCNC_MOUSE Cyclin-C OS=Mus musculus OX=10090 GN=Ccnc PE=2 SV=4	1	3	3	3	0	1	0	0	0	2	0	3	0	3	0	1	0	0	0	2	0	3	0	3	0	1	0	0	0	2	0	3	0	3	18	18	18	33.24	283	283	1	9
Q62448	Q62448	9	9	9	Eukaryotic translation initiation factor 4 gamma 2	Eif4g2	sp|Q62448|IF4G2_MOUSE Eukaryotic translation initiation factor 4 gamma 2 OS=Mus musculus OX=10090 GN=Eif4g2 PE=1 SV=2	1	9	9	9	4	5	1	1	2	5	2	6	0	9	4	5	1	1	2	5	2	6	0	9	4	5	1	1	2	5	2	6	0	9	13	13	13	102.1	906	906	1	35
Q62465	Q62465	20	20	20	Synaptic vesicle membrane protein VAT-1 homolog	Vat1	sp|Q62465|VAT1_MOUSE Synaptic vesicle membrane protein VAT-1 homolog OS=Mus musculus OX=10090 GN=Vat1 PE=1 SV=3	1	20	20	20	14	15	16	15	15	17	17	15	11	17	14	15	16	15	15	17	17	15	11	17	14	15	16	15	15	17	17	15	11	17	59.1	59.1	59.1	43.096	406	406	1	194
Q62481	Q62481	3	3	3	Vacuolar protein sorting-associated protein 72 homolog	Vps72	sp|Q62481|VPS72_MOUSE Vacuolar protein sorting-associated protein 72 homolog OS=Mus musculus OX=10090 GN=Vps72 PE=2 SV=2	1	3	3	3	1	2	1	0	0	1	2	1	0	2	1	2	1	0	0	1	2	1	0	2	1	2	1	0	0	1	2	1	0	2	14.9	14.9	14.9	40.783	368	368	1	10
Q62504	Q62504	14	14	14	Msx2-interacting protein	Spen	sp|Q62504|MINT_MOUSE Msx2-interacting protein OS=Mus musculus OX=10090 GN=Spen PE=1 SV=2	1	14	14	14	8	9	8	3	6	11	9	11	3	12	8	9	8	3	6	11	9	11	3	12	8	9	8	3	6	11	9	11	3	12	6	6	6	398.75	3644	3644	1	82
Q63810	Q63810	1	1	1	Calcineurin subunit B type 1	Ppp3r1	sp|Q63810|CANB1_MOUSE Calcineurin subunit B type 1 OS=Mus musculus OX=10090 GN=Ppp3r1 PE=1 SV=3	1	1	1	1	0	1	0	0	0	0	0	1	0	1	0	1	0	0	0	0	0	1	0	1	0	1	0	0	0	0	0	1	0	1	10	10	10	19.3	170	170	1	3
Q63829	Q63829	6	6	6	COMM domain-containing protein 3	Commd3	sp|Q63829|COMD3_MOUSE COMM domain-containing protein 3 OS=Mus musculus OX=10090 GN=Commd3 PE=1 SV=1	1	6	6	6	4	4	4	3	4	5	5	5	1	5	4	4	4	3	4	5	5	5	1	5	4	4	4	3	4	5	5	5	1	5	37.4	37.4	37.4	22.037	195	195	1	46
Q63850	Q63850	9	9	9	Nuclear pore glycoprotein p62	Nup62	sp|Q63850|NUP62_MOUSE Nuclear pore glycoprotein p62 OS=Mus musculus OX=10090 GN=Nup62 PE=1 SV=2	1	9	9	9	5	7	7	7	6	8	7	6	0	5	5	7	7	7	6	8	7	6	0	5	5	7	7	7	6	8	7	6	0	5	27.2	27.2	27.2	53.254	526	526	1	83
Q63871	Q63871	3	3	3	DNA-directed RNA polymerases I, II, and III subunit RPABC4	Polr2k	sp|Q63871|RPAB4_MOUSE DNA-directed RNA polymerases I, II, and III subunit RPABC4 OS=Mus musculus OX=10090 GN=Polr2k PE=3 SV=2	1	3	3	3	2	3	3	3	3	3	3	3	2	1	2	3	3	3	3	3	3	3	2	1	2	3	3	3	3	3	3	3	2	1	44.8	44.8	44.8	6.9741	58	58	1	26
Q63918	Q63918	9	9	9	Serum deprivation-response protein	Sdpr	sp|Q63918|CAVN2_MOUSE Caveolae-associated protein 2 OS=Mus musculus OX=10090 GN=Cavin2 PE=1 SV=3	1	9	9	9	5	5	6	6	5	7	8	8	5	7	5	5	6	6	5	7	8	8	5	7	5	5	6	6	5	7	8	8	5	7	25.6	25.6	25.6	46.763	418	418	1	62
Q63943;Q8CFN5;Q60929	Q63943	3;1;1	3;1;1	3;1;1	Myocyte-specific enhancer factor 2D	Mef2d	sp|Q63943|MEF2D_MOUSE Myocyte-specific enhancer factor 2D OS=Mus musculus OX=10090 GN=Mef2d PE=1 SV=2	3	3	3	3	2	2	1	2	2	2	2	2	2	3	2	2	1	2	2	2	2	2	2	3	2	2	1	2	2	2	2	2	2	3	8.9	8.9	8.9	55.064	514	514;474;498	1	21
Q64012	Q64012	11	11	11	RNA-binding protein Raly	Raly	sp|Q64012|RALY_MOUSE RNA-binding protein Raly OS=Mus musculus OX=10090 GN=Raly PE=1 SV=3	1	11	11	11	8	7	7	7	8	11	10	10	7	9	8	7	7	7	8	11	10	10	7	9	8	7	7	7	8	11	10	10	7	9	36.9	36.9	36.9	33.188	312	312	1	88
Q64092;Q9WTW4;Q08874	Q64092	3;1;1	3;1;1	3;1;1	Transcription factor E3	Tfe3	sp|Q64092|TFE3_MOUSE Transcription factor E3 OS=Mus musculus OX=10090 GN=Tfe3 PE=1 SV=2	3	3	3	3	2	1	2	1	1	3	1	1	1	2	2	1	2	1	1	3	1	1	1	2	2	1	2	1	1	3	1	1	1	2	4.9	4.9	4.9	61.535	572	572;317;526	1	15
Q640M1	Q640M1	1	1	1	U3 small nucleolar RNA-associated protein 14 homolog A	Utp14a	sp|Q640M1|UT14A_MOUSE U3 small nucleolar RNA-associated protein 14 homolog A OS=Mus musculus OX=10090 GN=Utp14a PE=1 SV=1	1	1	1	1	1	1	1	1	1	1	0	0	0	1	1	1	1	1	1	1	0	0	0	1	1	1	1	1	1	1	0	0	0	1	2.2	2.2	2.2	87.264	767	767	1	7
Q64152	Q64152	6	6	6	Transcription factor BTF3	Btf3	sp|Q64152|BTF3_MOUSE Transcription factor BTF3 OS=Mus musculus OX=10090 GN=Btf3 PE=1 SV=3	1	6	6	6	2	4	2	3	2	6	3	5	2	6	2	4	2	3	2	6	3	5	2	6	2	4	2	3	2	6	3	5	2	6	40.7	40.7	40.7	22.031	204	204	1	39
Q641P0	Q641P0	5	2	2	Actin-related protein 3B	Actr3b	sp|Q641P0|ARP3B_MOUSE Actin-related protein 3B OS=Mus musculus OX=10090 GN=Actr3b PE=1 SV=1	1	5	2	2	1	3	3	2	1	3	4	4	2	5	0	1	1	0	0	1	1	1	0	2	0	1	1	0	0	1	1	1	0	2	17.2	9.6	9.6	47.579	418	418	1	7
Q64213	Q64213	17	17	17	Splicing factor 1	Sf1	sp|Q64213|SF01_MOUSE Splicing factor 1 OS=Mus musculus OX=10090 GN=Sf1 PE=1 SV=6	1	17	17	17	10	16	15	14	14	15	15	17	15	16	10	16	15	14	14	15	15	17	15	16	10	16	15	14	14	15	15	17	15	16	33.8	33.8	33.8	70.402	653	653	1	214
Q64310	Q64310	3	3	3	Surfeit locus protein 4	Surf4	sp|Q64310|SURF4_MOUSE Surfeit locus protein 4 OS=Mus musculus OX=10090 GN=Surf4 PE=1 SV=1	1	3	3	3	2	3	3	3	3	3	3	2	0	2	2	3	3	3	3	3	3	2	0	2	2	3	3	3	3	3	3	2	0	2	14.5	14.5	14.5	30.381	269	269	1	27
Q64318	Q64318	12	12	9	Zinc finger E-box-binding homeobox 1	Zeb1	sp|Q64318|ZEB1_MOUSE Zinc finger E-box-binding homeobox 1 OS=Mus musculus OX=10090 GN=Zeb1 PE=1 SV=1	1	12	12	9	6	8	9	5	6	9	9	10	1	7	6	8	9	5	6	9	9	10	1	7	5	5	6	4	6	7	7	8	1	6	17.2	17.2	13.2	122.46	1117	1117	1	70
Q64321	Q64321	1	1	1	Zinc finger and BTB domain-containing protein 7B	Zbtb7b	sp|Q64321|ZBT7B_MOUSE Zinc finger and BTB domain-containing protein 7B OS=Mus musculus OX=10090 GN=Zbtb7b PE=1 SV=2	1	1	1	1	0	1	1	1	1	1	1	1	0	1	0	1	1	1	1	1	1	1	0	1	0	1	1	1	1	1	1	1	0	1	2	2	2	58.917	544	544	1	8
Q64331	Q64331	2	2	2	Unconventional myosin-VI	Myo6	sp|Q64331|MYO6_MOUSE Unconventional myosin-VI OS=Mus musculus OX=10090 GN=Myo6 PE=1 SV=1	1	2	2	2	1	1	2	1	1	2	1	2	1	1	1	1	2	1	1	2	1	2	1	1	1	1	2	1	1	2	1	2	1	1	1.5	1.5	1.5	146.41	1265	1265	1	15
Q64332	Q64332	2	2	2	Synapsin-2	Syn2	sp|Q64332|SYN2_MOUSE Synapsin-2 OS=Mus musculus OX=10090 GN=Syn2 PE=1 SV=2	1	2	2	2	0	1	1	2	0	2	2	2	0	2	0	1	1	2	0	2	2	2	0	2	0	1	1	2	0	2	2	2	0	2	3.9	3.9	3.9	63.372	586	586	1	12
Q64337	Q64337	5	5	5	Sequestosome-1	Sqstm1	sp|Q64337|SQSTM_MOUSE Sequestosome-1 OS=Mus musculus OX=10090 GN=Sqstm1 PE=1 SV=1	1	5	5	5	3	3	3	4	2	3	4	4	0	5	3	3	3	4	2	3	4	4	0	5	3	3	3	4	2	3	4	4	0	5	19.7	19.7	19.7	48.162	442	442	1	31
Q64364	Q64364	1	1	1	Tumor suppressor ARF	Cdkn2a	sp|Q64364|ARF_MOUSE Tumor suppressor ARF OS=Mus musculus OX=10090 GN=Cdkn2a PE=1 SV=1	1	1	1	1	1	1	0	0	1	1	0	1	0	1	1	1	0	0	1	1	0	1	0	1	1	1	0	0	1	1	0	1	0	1	8.3	8.3	8.3	19.238	169	169	1	8
Q64378	Q64378	15	15	15	Peptidyl-prolyl cis-trans isomerase FKBP5;Peptidyl-prolyl cis-trans isomerase FKBP5, N-terminally processed	Fkbp5	sp|Q64378|FKBP5_MOUSE Peptidyl-prolyl cis-trans isomerase FKBP5 OS=Mus musculus OX=10090 GN=Fkbp5 PE=1 SV=1	1	15	15	15	9	12	10	10	6	13	12	15	4	11	9	12	10	10	6	13	12	15	4	11	9	12	10	10	6	13	12	15	4	11	38.8	38.8	38.8	50.966	456	456	1	104
Q64433;Q9JI95	Q64433;Q9JI95	8;7	8;7	8;7	10 kDa heat shock protein, mitochondrial	Hspe1;Cpn10-rs1	sp|Q64433|CH10_MOUSE 10 kDa heat shock protein, mitochondrial OS=Mus musculus OX=10090 GN=Hspe1 PE=1 SV=2;tr|Q9JI95|Q9JI95_MOUSE CPN10-like protein OS=Mus musculus OX=10090 GN=Hspe1-rs1 PE=3 SV=1	2	8	8	8	7	5	5	5	6	4	5	2	7	4	7	5	5	5	6	4	5	2	7	4	7	5	5	5	6	4	5	2	7	4	56.9	56.9	56.9	10.963	102	102;102	1	51
Q64511	Q64511	34	21	21	DNA topoisomerase 2-beta	Top2b	sp|Q64511|TOP2B_MOUSE DNA topoisomerase 2-beta OS=Mus musculus OX=10090 GN=Top2b PE=1 SV=2	1	34	21	21	16	25	18	13	18	29	20	23	19	28	7	12	8	5	7	17	8	10	10	16	7	12	8	5	7	17	8	10	10	16	23.4	16.9	16.9	181.91	1612	1612	1	100
Q64514	Q64514	1	1	1	Tripeptidyl-peptidase 2	Tpp2	sp|Q64514|TPP2_MOUSE Tripeptidyl-peptidase 2 OS=Mus musculus OX=10090 GN=Tpp2 PE=1 SV=3	1	1	1	1	0	1	1	1	1	1	1	1	1	1	0	1	1	1	1	1	1	1	1	1	0	1	1	1	1	1	1	1	1	1	0.8	0.8	0.8	139.88	1262	1262	1	9
Q64701	Q64701	4	4	4	Retinoblastoma-like protein 1	Rbl1	sp|Q64701|RBL1_MOUSE Retinoblastoma-like protein 1 OS=Mus musculus OX=10090 GN=Rbl1 PE=1 SV=3	1	4	4	4	1	2	3	2	2	4	2	3	1	3	1	2	3	2	2	4	2	3	1	3	1	2	3	2	2	4	2	3	1	3	3.6	3.6	3.6	119.46	1063	1063	1	23
Q64705	Q64705	6	5	5	Upstream stimulatory factor 2	Usf2	sp|Q64705|USF2_MOUSE Upstream stimulatory factor 2 OS=Mus musculus OX=10090 GN=Usf2 PE=1 SV=1	1	6	5	5	4	5	5	4	5	6	5	6	1	6	3	5	4	3	4	5	4	5	0	5	3	5	4	3	4	5	4	5	0	5	18.8	15.9	15.9	36.953	346	346	1	45
Q64727	Q64727	23	23	23	Vinculin	Vcl	sp|Q64727|VINC_MOUSE Vinculin OS=Mus musculus OX=10090 GN=Vcl PE=1 SV=4	1	23	23	23	1	12	5	3	3	11	9	17	1	22	1	12	5	3	3	11	9	17	1	22	1	12	5	3	3	11	9	17	1	22	35	35	35	116.72	1066	1066	1	90
Q64737	Q64737	2	2	2	Trifunctional purine biosynthetic protein adenosine-3;Phosphoribosylamine--glycine ligase;Phosphoribosylformylglycinamidine cyclo-ligase;Phosphoribosylglycinamide formyltransferase	Gart	sp|Q64737|PUR2_MOUSE Trifunctional purine biosynthetic protein adenosine-3 OS=Mus musculus OX=10090 GN=Gart PE=1 SV=3	1	2	2	2	0	0	0	0	0	0	0	0	0	2	0	0	0	0	0	0	0	0	0	2	0	0	0	0	0	0	0	0	0	2	4.1	4.1	4.1	107.5	1010	1010	1	2
Q65Z40	Q65Z40	22	22	22	Wings apart-like protein homolog	Wapal	sp|Q65Z40|WAPL_MOUSE Wings apart-like protein homolog OS=Mus musculus OX=10090 GN=Wapl PE=1 SV=2	1	22	22	22	9	15	14	8	9	11	11	15	0	14	9	15	14	8	9	11	11	15	0	14	9	15	14	8	9	11	11	15	0	14	25.4	25.4	25.4	134.07	1200	1200	1	109
Q66JX5;P0CAX8	Q66JX5;P0CAX8	2;1	2;1	2;1	FGFR1 oncogene partner;T-cell activation GTPase-activating protein 1	Fgfr1op;Tagap1	sp|Q66JX5|CEP43_MOUSE Centrosomal protein 43 OS=Mus musculus OX=10090 GN=Cep43 PE=1 SV=1;sp|P0CAX8|TGAP1_MOUSE T-cell activation GTPase-activating protein 1 OS=Mus musculus OX=10090 GN=Tagap1 PE=2 SV=1	2	2	2	2	0	0	0	0	1	1	1	1	0	2	0	0	0	0	1	1	1	1	0	2	0	0	0	0	1	1	1	1	0	2	11	11	11	42.758	399	399;505	1	6
Q68FD5	Q68FD5	91	91	91	Clathrin heavy chain 1	Cltc	sp|Q68FD5|CLH1_MOUSE Clathrin heavy chain 1 OS=Mus musculus OX=10090 GN=Cltc PE=1 SV=3	1	91	91	91	68	76	82	69	70	83	80	87	62	89	68	76	82	69	70	83	80	87	62	89	68	76	82	69	70	83	80	87	62	89	64.1	64.1	64.1	191.55	1675	1675	1	1042
Q68FF6	Q68FF6	4	3	3	ARF GTPase-activating protein GIT1	Git1	sp|Q68FF6|GIT1_MOUSE ARF GTPase-activating protein GIT1 OS=Mus musculus OX=10090 GN=Git1 PE=1 SV=1	1	4	3	3	0	1	0	2	1	1	2	1	0	3	0	1	0	1	0	1	1	0	0	3	0	1	0	1	0	1	1	0	0	3	8.4	6.5	6.5	85.299	770	770	1	7
Q68FG2	Q68FG2	10	1	1		Sptbn2	tr|Q68FG2|Q68FG2_MOUSE Spectrin beta chain OS=Mus musculus OX=10090 GN=Sptbn2 PE=1 SV=1	1	10	1	1	8	8	8	7	8	9	9	10	3	10	1	1	1	1	1	1	1	1	0	1	1	1	1	1	1	1	1	1	0	1	4.2	0.3	0.3	270.92	2388	2388	1	9
Q68FG3	Q68FG3	5	5	5	Protein SPT2 homolog	Spty2d1	sp|Q68FG3|SPT2_MOUSE Protein SPT2 homolog OS=Mus musculus OX=10090 GN=Spty2d1 PE=2 SV=1	1	5	5	5	1	2	3	3	3	3	3	2	4	3	1	2	3	3	3	3	3	2	4	3	1	2	3	3	3	3	3	2	4	3	8.1	8.1	8.1	74.817	682	682	1	28
Q68FL6	Q68FL6	7	7	7	Methionine--tRNA ligase, cytoplasmic	Mars	sp|Q68FL6|SYMC_MOUSE Methionine--tRNA ligase, cytoplasmic OS=Mus musculus OX=10090 GN=Mars1 PE=1 SV=1	1	7	7	7	3	4	2	2	1	6	5	6	0	5	3	4	2	2	1	6	5	6	0	5	3	4	2	2	1	6	5	6	0	5	10.3	10.3	10.3	101.43	902	902	1	36
Q69Z66	Q69Z66	2	2	2	Histone H2A deubiquitinase MYSM1	Mysm1	sp|Q69Z66|MYSM1_MOUSE Deubiquitinase MYSM1 OS=Mus musculus OX=10090 GN=Mysm1 PE=1 SV=2	1	2	2	2	0	1	0	0	0	0	0	0	0	1	0	1	0	0	0	0	0	0	0	1	0	1	0	0	0	0	0	0	0	1	3.2	3.2	3.2	93.474	819	819	1	2
Q69Z99	Q69Z99	2	2	2	Zinc finger protein 512	Znf512	sp|Q69Z99|ZN512_MOUSE Zinc finger protein 512 OS=Mus musculus OX=10090 GN=Znf512 PE=2 SV=2	1	2	2	2	2	2	2	0	1	2	1	2	1	1	2	2	2	0	1	2	1	2	1	1	2	2	2	0	1	2	1	2	1	1	5.3	5.3	5.3	63.908	562	562	1	14
Q69ZA1	Q69ZA1	4	2	2	Cyclin-dependent kinase 13	Cdk13	sp|Q69ZA1|CDK13_MOUSE Cyclin-dependent kinase 13 OS=Mus musculus OX=10090 GN=Cdk13 PE=1 SV=3	1	4	2	2	3	3	3	2	2	3	3	2	1	3	1	1	1	1	1	1	1	0	0	1	1	1	1	1	1	1	1	0	0	1	4.1	2.4	2.4	164.55	1511	1511	1	8
Q69ZK6	Q69ZK6	17	17	17	Probable JmjC domain-containing histone demethylation protein 2C	Jmjd1c	sp|Q69ZK6|JHD2C_MOUSE Probable JmjC domain-containing histone demethylation protein 2C OS=Mus musculus OX=10090 GN=Jmjd1c PE=1 SV=3	1	17	17	17	5	7	7	6	6	12	9	11	1	15	5	7	7	6	6	12	9	11	1	15	5	7	7	6	6	12	9	11	1	15	10	10	10	260.64	2350	2350	1	83
Q69ZQ2	Q69ZQ2	9	9	9	Pre-mRNA-splicing factor ISY1 homolog	Isy1	sp|Q69ZQ2|ISY1_MOUSE Pre-mRNA-splicing factor ISY1 homolog OS=Mus musculus OX=10090 GN=Isy1 PE=1 SV=2	1	9	9	9	7	9	6	5	8	7	7	6	6	7	7	9	6	5	8	7	7	6	6	7	7	9	6	5	8	7	7	6	6	7	36.8	36.8	36.8	32.989	285	285	1	70
Q69ZS7	Q69ZS7	2	2	2	HBS1-like protein	Hbs1l	sp|Q69ZS7|HBS1L_MOUSE HBS1-like protein OS=Mus musculus OX=10090 GN=Hbs1l PE=1 SV=2	1	2	2	2	0	2	0	0	0	1	0	0	0	1	0	2	0	0	0	1	0	0	0	1	0	2	0	0	0	1	0	0	0	1	5.3	5.3	5.3	75.1	682	682	1	4
Q69ZX6;Q8C5W4	Q69ZX6	16;2	16;2	16;2	MORC family CW-type zinc finger protein 2A	Morc2a	sp|Q69ZX6|MOR2A_MOUSE ATPase MORC2A OS=Mus musculus OX=10090 GN=Morc2a PE=1 SV=2	2	16	16	16	10	14	12	9	11	13	9	13	2	14	10	14	12	9	11	13	9	13	2	14	10	14	12	9	11	13	9	13	2	14	17.8	17.8	17.8	117.33	1030	1030;1022	1	107
Q6A026	Q6A026	48	48	46	Sister chromatid cohesion protein PDS5 homolog A	Pds5a	sp|Q6A026|PDS5A_MOUSE Sister chromatid cohesion protein PDS5 homolog A OS=Mus musculus OX=10090 GN=Pds5a PE=1 SV=3	1	48	48	46	19	31	26	19	22	34	29	36	6	41	19	31	26	19	22	34	29	36	6	41	18	30	25	18	21	32	28	35	6	39	45.9	45.9	44.4	150.33	1332	1332	1	290
Q6A028	Q6A028	3	3	3	Switch-associated protein 70	Swap70	sp|Q6A028|SWP70_MOUSE Switch-associated protein 70 OS=Mus musculus OX=10090 GN=Swap70 PE=1 SV=2	1	3	3	3	0	2	1	0	0	1	1	1	0	1	0	2	1	0	0	1	1	1	0	1	0	2	1	0	0	1	1	1	0	1	6.3	6.3	6.3	68.995	585	585	1	7
Q6A065;Q80U49	Q6A065	34;2	34;2	34;2	Centrosomal protein of 170 kDa	Cep170	sp|Q6A065|CE170_MOUSE Centrosomal protein of 170 kDa OS=Mus musculus OX=10090 GN=Cep170 PE=1 SV=2	2	34	34	34	19	22	22	18	21	31	28	25	10	28	19	22	22	18	21	31	28	25	10	28	19	22	22	18	21	31	28	25	10	28	32.2	32.2	32.2	175.05	1588	1588;1574	1	245
Q6A068;A0A1W2P7Z8;A0A1W2P7H4;A0A1W2P855;A0A1W2P6Q8;A0A1W2P7S8	Q6A068;A0A1W2P7Z8;A0A1W2P7H4;A0A1W2P855;A0A1W2P6Q8;A0A1W2P7S8	31;24;24;23;23;22	31;24;24;23;23;22	31;24;24;23;23;22	Cell division cycle 5-like protein	Cdc5l	sp|Q6A068|CDC5L_MOUSE Cell division cycle 5-like protein OS=Mus musculus OX=10090 GN=Cdc5l PE=1 SV=2;tr|A0A1W2P7Z8|A0A1W2P7Z8_MOUSE Predicted gene 9045 OS=Mus musculus OX=10090 GN=Gm9045 PE=3 SV=1;tr|A0A1W2P7H4|A0A1W2P7H4_MOUSE Predicted gene 9048 OS=Mus m	6	31	31	31	20	23	24	23	23	26	25	29	15	25	20	23	24	23	23	26	25	29	15	25	20	23	24	23	23	26	25	29	15	25	49.3	49.3	49.3	92.188	802	802;802;802;802;802;802	1	283
Q6A085	Q6A085	2	2	2	Zinc finger protein 629	Znf629	sp|Q6A085|ZN629_MOUSE Zinc finger protein 629 OS=Mus musculus OX=10090 GN=Znf629 PE=2 SV=2	1	2	2	2	0	1	1	0	0	0	1	1	0	1	0	1	1	0	0	0	1	1	0	1	0	1	1	0	0	0	1	1	0	1	2.5	2.5	2.5	96.032	867	867	1	5
Q6A0A2	Q6A0A2	14	14	14	La-related protein 4B	Larp4b	sp|Q6A0A2|LAR4B_MOUSE La-related protein 4B OS=Mus musculus OX=10090 GN=Larp4b PE=1 SV=2	1	14	14	14	5	9	10	6	5	12	14	12	4	14	5	9	10	6	5	12	14	12	4	14	5	9	10	6	5	12	14	12	4	14	26.6	26.6	26.6	81.626	741	741	1	95
Q6A0A9	Q6A0A9	2	2	2	Constitutive coactivator of PPAR-gamma-like protein 1	FAM120A	sp|Q6A0A9|F120A_MOUSE Constitutive coactivator of PPAR-gamma-like protein 1 OS=Mus musculus OX=10090 GN=FAM120A PE=1 SV=2	1	2	2	2	1	0	0	0	0	1	1	1	1	1	1	0	0	0	0	1	1	1	1	1	1	0	0	0	0	1	1	1	1	1	2.6	2.6	2.6	121.64	1112	1112	1	6
Q6A4J8	Q6A4J8	21	21	21	Ubiquitin carboxyl-terminal hydrolase 7	Usp7	sp|Q6A4J8|UBP7_MOUSE Ubiquitin carboxyl-terminal hydrolase 7 OS=Mus musculus OX=10090 GN=Usp7 PE=1 SV=1	1	21	21	21	6	9	8	8	7	13	14	15	2	15	6	9	8	8	7	13	14	15	2	15	6	9	8	8	7	13	14	15	2	15	28	28	28	128.47	1103	1103	1	98
Q6DFV1	Q6DFV1	7	7	7	Condensin-2 complex subunit G2	Ncapg2	sp|Q6DFV1|CNDG2_MOUSE Condensin-2 complex subunit G2 OS=Mus musculus OX=10090 GN=Ncapg2 PE=1 SV=2	1	7	7	7	1	4	0	0	0	3	2	3	1	6	1	4	0	0	0	3	2	3	1	6	1	4	0	0	0	3	2	3	1	6	8	8	8	130.89	1138	1138	1	20
Q6DFV5	Q6DFV5	7	7	7	Probable helicase with zinc finger domain	Helz	sp|Q6DFV5|HELZ_MOUSE Probable helicase with zinc finger domain OS=Mus musculus OX=10090 GN=Helz PE=1 SV=2	1	7	7	7	2	2	1	0	1	4	2	3	0	5	2	2	1	0	1	4	2	3	0	5	2	2	1	0	1	4	2	3	0	5	4.8	4.8	4.8	219.88	1964	1964	1	20
Q6DFW4	Q6DFW4	16	16	16	Nucleolar protein 58	Nop58	sp|Q6DFW4|NOP58_MOUSE Nucleolar protein 58 OS=Mus musculus OX=10090 GN=Nop58 PE=1 SV=1	1	16	16	16	11	14	14	14	13	13	14	14	10	11	11	14	14	14	13	13	14	14	10	11	11	14	14	14	13	13	14	14	10	11	40.1	40.1	40.1	60.342	536	536	1	173
Q6DIB4	Q6DIB4	9	9	9	Nucleolar protein 4-like	Nol4l	sp|Q6DIB4|NOL4L_MOUSE Nucleolar protein 4-like OS=Mus musculus OX=10090 GN=Nol4l PE=2 SV=1	1	9	9	9	1	4	1	3	2	7	4	6	0	7	1	4	1	3	2	7	4	6	0	7	1	4	1	3	2	7	4	6	0	7	24.9	24.9	24.9	53.912	494	494	1	36
Q6DIC0	Q6DIC0	23	3	3	Probable global transcription activator SNF2L2	Smarca2	sp|Q6DIC0|SMCA2_MOUSE Probable global transcription activator SNF2L2 OS=Mus musculus OX=10090 GN=Smarca2 PE=1 SV=1	1	23	3	3	16	18	17	17	17	21	18	20	9	21	2	1	2	2	2	2	2	3	0	2	2	1	2	2	2	2	2	3	0	2	13.7	2.7	2.7	180.25	1577	1577	1	18
Q6DID3	Q6DID3	15	15	12	Protein SCAF8	Scaf8	sp|Q6DID3|SCAF8_MOUSE SR-related and CTD-associated factor 8 OS=Mus musculus OX=10090 GN=Scaf8 PE=1 SV=1	1	15	15	12	10	14	11	7	12	13	15	12	3	9	10	14	11	7	12	13	15	12	3	9	8	11	8	4	9	11	12	10	2	8	15.8	15.8	13.7	139.57	1268	1268	1	118
Q6DID5	Q6DID5	6	6	6	PWWP domain-containing protein MUM1	Mum1	sp|Q6DID5|PWP3A_MOUSE PWWP domain-containing DNA repair factor 3A OS=Mus musculus OX=10090 GN=Pwwp3a PE=1 SV=1	1	6	6	6	1	2	3	2	2	4	4	4	0	6	1	2	3	2	2	4	4	4	0	6	1	2	3	2	2	4	4	4	0	6	12.6	12.6	12.6	76.068	682	682	1	28
Q6GQT9	Q6GQT9	9	9	9	Nodal modulator 1	Nomo1	sp|Q6GQT9|NOMO1_MOUSE Nodal modulator 1 OS=Mus musculus OX=10090 GN=Nomo1 PE=1 SV=1	1	9	9	9	6	8	8	6	4	0	0	0	0	2	6	8	8	6	4	0	0	0	0	2	6	8	8	6	4	0	0	0	0	2	9.1	9.1	9.1	133.42	1214	1214	1	34
Q6GU68	Q6GU68	2	2	2	Immunoglobulin superfamily containing leucine-rich repeat protein	Islr	sp|Q6GU68|ISLR_MOUSE Immunoglobulin superfamily containing leucine-rich repeat protein OS=Mus musculus OX=10090 GN=Islr PE=1 SV=1	1	2	2	2	1	1	1	1	1	1	1	1	1	0	1	1	1	1	1	1	1	1	1	0	1	1	1	1	1	1	1	1	1	0	5.6	5.6	5.6	45.614	428	428	1	9
Q6IQX8	Q6IQX8	3	3	3		Zfp219	sp|Q6IQX8|ZN219_MOUSE Zinc finger protein 219 OS=Mus musculus OX=10090 GN=Znf219 PE=1 SV=1	1	3	3	3	2	2	2	1	0	2	2	2	0	1	2	2	2	1	0	2	2	2	0	1	2	2	2	1	0	2	2	2	0	1	7.7	7.7	7.7	77.795	726	726	1	14
Q6IR34;Q8VDU0	Q6IR34	5;1	5;1	5;1	G-protein-signaling modulator 1	Gpsm1	sp|Q6IR34|GPSM1_MOUSE G-protein-signaling modulator 1 OS=Mus musculus OX=10090 GN=Gpsm1 PE=1 SV=3	2	5	5	5	1	3	4	0	0	3	2	3	0	4	1	3	4	0	0	3	2	3	0	4	1	3	4	0	0	3	2	3	0	4	10	10	10	74.361	673	673;679	1	20
Q6IRU2	Q6IRU2	3	3	3	Tropomyosin alpha-4 chain	Tpm4	sp|Q6IRU2|TPM4_MOUSE Tropomyosin alpha-4 chain OS=Mus musculus OX=10090 GN=Tpm4 PE=1 SV=3	1	3	3	3	1	1	1	2	3	2	3	3	2	3	1	1	1	2	3	2	3	3	2	3	1	1	1	2	3	2	3	3	2	3	15.7	15.7	15.7	28.467	248	248	1	21
Q6IRU5	Q6IRU5	8	8	8	Clathrin light chain B	Cltb	sp|Q6IRU5|CLCB_MOUSE Clathrin light chain B OS=Mus musculus OX=10090 GN=Cltb PE=1 SV=1	1	8	8	8	5	4	6	4	5	5	5	6	6	7	5	4	6	4	5	5	5	6	6	7	5	4	6	4	5	5	5	6	6	7	27.5	27.5	27.5	25.171	229	229	1	57
Q6JPI3	Q6JPI3	5	5	5	Mediator of RNA polymerase II transcription subunit 13-like	Med13l	sp|Q6JPI3|MD13L_MOUSE Mediator of RNA polymerase II transcription subunit 13-like OS=Mus musculus OX=10090 GN=Med13l PE=1 SV=2	1	5	5	5	1	1	2	0	1	2	2	2	0	5	1	1	2	0	1	2	2	2	0	5	1	1	2	0	1	2	2	2	0	5	3.5	3.5	3.5	241.76	2207	2207	1	16
Q6KAR6	Q6KAR6	3	3	3	Exocyst complex component 3	Exoc3	sp|Q6KAR6|EXOC3_MOUSE Exocyst complex component 3 OS=Mus musculus OX=10090 GN=Exoc3 PE=1 SV=2	1	3	3	3	0	3	1	1	0	3	1	2	1	2	0	3	1	1	0	3	1	2	1	2	0	3	1	1	0	3	1	2	1	2	5.6	5.6	5.6	86.454	755	755	1	14
Q6NS46	Q6NS46	30	30	30	Protein RRP5 homolog	Pdcd11	sp|Q6NS46|RRP5_MOUSE Protein RRP5 homolog OS=Mus musculus OX=10090 GN=Pdcd11 PE=1 SV=2	1	30	30	30	25	23	20	17	21	25	15	12	4	20	25	23	20	17	21	25	15	12	4	20	25	23	20	17	21	25	15	12	4	20	20.6	20.6	20.6	207.78	1862	1862	1	198
Q6NSQ7	Q6NSQ7	2	2	2	Protein LTV1 homolog	Ltv1	sp|Q6NSQ7|LTV1_MOUSE Protein LTV1 homolog OS=Mus musculus OX=10090 GN=Ltv1 PE=1 SV=2	1	2	2	2	1	2	2	1	1	1	1	2	2	0	1	2	2	1	1	1	1	2	2	0	1	2	2	1	1	1	1	2	2	0	3.6	3.6	3.6	54.022	470	470	1	13
Q6NSQ9	Q6NSQ9	2	2	2	Glucose-6-phosphatase 3	G6pc3	sp|Q6NSQ9|G6PC3_MOUSE Glucose-6-phosphatase 3 OS=Mus musculus OX=10090 GN=G6pc3 PE=1 SV=1	1	2	2	2	1	2	0	1	0	0	0	0	0	0	1	2	0	1	0	0	0	0	0	0	1	2	0	1	0	0	0	0	0	0	10.4	10.4	10.4	38.781	346	346	1	4
Q6NV83	Q6NV83	37	37	37	U2 snRNP-associated SURP motif-containing protein	U2surp	sp|Q6NV83|SR140_MOUSE U2 snRNP-associated SURP motif-containing protein OS=Mus musculus OX=10090 GN=U2surp PE=1 SV=3	1	37	37	37	20	26	24	21	23	30	27	28	9	34	20	26	24	21	23	30	27	28	9	34	20	26	24	21	23	30	27	28	9	34	43.2	43.2	43.2	118.26	1029	1029	1	293
Q6NV99	Q6NV99	8	8	8		Haus6	tr|Q6NV99|Q6NV99_MOUSE HAUS augmin-like complex, subunit 6 OS=Mus musculus OX=10090 GN=Haus6 PE=1 SV=1	1	8	8	8	0	2	2	1	1	5	4	4	0	6	0	2	2	1	1	5	4	4	0	6	0	2	2	1	1	5	4	4	0	6	10.6	10.6	10.6	105.6	933	933	1	25
Q6NVF9	Q6NVF9	12	12	12	Cleavage and polyadenylation specificity factor subunit 6	Cpsf6	sp|Q6NVF9|CPSF6_MOUSE Cleavage and polyadenylation specificity factor subunit 6 OS=Mus musculus OX=10090 GN=Cpsf6 PE=1 SV=1	1	12	12	12	8	9	9	8	7	10	9	10	5	11	8	9	9	8	7	10	9	10	5	11	8	9	9	8	7	10	9	10	5	11	26.9	26.9	26.9	59.152	551	551	1	110
Q6NXI6	Q6NXI6	15	15	15	Regulation of nuclear pre-mRNA domain-containing protein 2	Rprd2	sp|Q6NXI6|RPRD2_MOUSE Regulation of nuclear pre-mRNA domain-containing protein 2 OS=Mus musculus OX=10090 GN=Rprd2 PE=1 SV=1	1	15	15	15	6	9	9	6	7	12	7	7	2	12	6	9	9	6	7	12	7	7	2	12	6	9	9	6	7	12	7	7	2	12	18.9	18.9	18.9	156.58	1469	1469	1	78
Q6NXL1	Q6NXL1	2	2	2		Sec24d	tr|Q6NXL1|Q6NXL1_MOUSE Sec24-related gene family, member D (S. cerevisiae) OS=Mus musculus OX=10090 GN=Sec24d PE=1 SV=1	1	2	2	2	1	2	2	2	1	2	2	1	0	2	1	2	2	2	1	2	2	1	0	2	1	2	2	2	1	2	2	1	0	2	2.2	2.2	2.2	112.67	1032	1032	1	15
Q6NZB0	Q6NZB0	13	13	13	DnaJ homolog subfamily C member 8	Dnajc8	sp|Q6NZB0|DNJC8_MOUSE DnaJ homolog subfamily C member 8 OS=Mus musculus OX=10090 GN=Dnajc8 PE=1 SV=2	1	13	13	13	7	9	11	10	10	12	12	12	7	12	7	9	11	10	10	12	12	12	7	12	7	9	11	10	10	12	12	12	7	12	41.5	41.5	41.5	29.812	253	253	1	137
Q6NZC7	Q6NZC7	4	4	4	SEC23-interacting protein	Sec23ip	sp|Q6NZC7|S23IP_MOUSE SEC23-interacting protein OS=Mus musculus OX=10090 GN=Sec23ip PE=1 SV=2	1	4	4	4	0	1	1	1	0	1	0	1	0	4	0	1	1	1	0	1	0	1	0	4	0	1	1	1	0	1	0	1	0	4	6.1	6.1	6.1	110.78	998	998	1	9
Q6NZF1	Q6NZF1	21	21	21	Zinc finger CCCH domain-containing protein 11A	Zc3h11a	sp|Q6NZF1|ZC11A_MOUSE Zinc finger CCCH domain-containing protein 11A OS=Mus musculus OX=10090 GN=Zc3h11a PE=1 SV=1	1	21	21	21	9	11	9	7	9	13	13	14	10	18	9	11	9	7	9	13	13	14	10	18	9	11	9	7	9	13	13	14	10	18	40.8	40.8	40.8	86.491	792	792	1	119
Q6NZJ6	Q6NZJ6	51	51	46	Eukaryotic translation initiation factor 4 gamma 1	Eif4g1	sp|Q6NZJ6|IF4G1_MOUSE Eukaryotic translation initiation factor 4 gamma 1 OS=Mus musculus OX=10090 GN=Eif4g1 PE=1 SV=1	1	51	51	46	21	30	35	29	26	45	43	46	14	44	21	30	35	29	26	45	43	46	14	44	17	26	30	25	21	40	38	41	11	40	37.7	37.7	34.6	176.07	1600	1600	1	380
Q6NZN0	Q6NZN0	21	21	20	RNA-binding protein 26	Rbm26	sp|Q6NZN0|RBM26_MOUSE RNA-binding protein 26 OS=Mus musculus OX=10090 GN=Rbm26 PE=1 SV=2	1	21	21	20	9	15	14	10	10	16	15	16	4	19	9	15	14	10	10	16	15	16	4	19	9	14	14	10	9	15	14	15	3	18	24.9	24.9	23.7	114.14	1012	1012	1	140
Q6NZQ2	Q6NZQ2	5	5	5		Ddx31	sp|Q6NZQ2|DDX31_MOUSE Probable ATP-dependent RNA helicase DDX31 OS=Mus musculus OX=10090 GN=Ddx31 PE=2 SV=2	1	5	5	5	4	5	2	0	1	2	2	2	0	5	4	5	2	0	1	2	2	2	0	5	4	5	2	0	1	2	2	2	0	5	10.8	10.8	10.8	76.912	687	687	1	23
Q6NZQ4	Q6NZQ4	5	5	5	PAX-interacting protein 1	Paxip1	sp|Q6NZQ4|PAXI1_MOUSE PAX-interacting protein 1 OS=Mus musculus OX=10090 GN=Paxip1 PE=1 SV=1	1	5	5	5	0	1	1	0	0	3	1	2	0	3	0	1	1	0	0	3	1	2	0	3	0	1	1	0	0	3	1	2	0	3	7.6	7.6	7.6	119.27	1056	1056	1	11
Q6NZR5	Q6NZR5	4	4	4		Skiv2l	tr|Q6NZR5|Q6NZR5_MOUSE Superkiller viralicidic activity 2-like (S. cerevisiae) OS=Mus musculus OX=10090 GN=Skiv2l PE=1 SV=1	1	4	4	4	2	2	1	1	0	2	2	2	0	4	2	2	1	1	0	2	2	2	0	4	2	2	1	1	0	2	2	2	0	4	4.7	4.7	4.7	137.52	1244	1244	1	19
Q6P069	Q6P069	2	2	2	Sorcin	Sri	sp|Q6P069|SORCN_MOUSE Sorcin OS=Mus musculus OX=10090 GN=Sri PE=1 SV=1	1	2	2	2	1	0	0	0	1	0	0	2	0	1	1	0	0	0	1	0	0	2	0	1	1	0	0	0	1	0	0	2	0	1	9.1	9.1	9.1	21.627	198	198	1	5
Q6P1D7	Q6P1D7	1	1	1	Structure-specific endonuclease subunit SLX4	Slx4	sp|Q6P1D7|SLX4_MOUSE Structure-specific endonuclease subunit SLX4 OS=Mus musculus OX=10090 GN=Slx4 PE=1 SV=1	1	1	1	1	0	0	0	0	0	0	0	0	0	1	0	0	0	0	0	0	0	0	0	1	0	0	0	0	0	0	0	0	0	1	0.6	0.6	0.6	172.41	1565	1565	1	1
[truncated: 1,687 more rows]
[truncated: 80 more columns]

## Sheet: perseus_result_nuclear Proteins
UniProt Accession							FDR correction + indicates significance	Overall Identified peptides	Identification Score			log2 transformed LFQ intensities of full length RNA interactome					log2 transformed LFQ intensities of mutant RNA interactome					Number of identified unique peptides
[truncated: 885 more rows]
